# Supplementary material for: Genetic Diversity of Transcription Factor Genes in Triticum and Mining for Promising Haplotypes for Beneficial Agronomic Traits
Source: Front Plant Sci. 2022 Jul 8;13:899292. doi: 10.3389/fpls.2022.899292 (PMC9305608; doi:10.3389/fpls.2022.899292)
Supplement: Supplementary file 3 [file Data_Sheet_1.xlsx]

## Sheet: Table 1
Table S1. Summary of all TF genes.
TF	Chrom	Gene ID	Start	End	Strand	Family	Exon number	cDNA length	Protein length	pI	Mw	PO and TO annotation	Tissue specificity index	Cluster
TraesCS1A02G110200.1	1A	TraesCS1A02G110200	109573740	109578560	+	Alfin-like	6	1195	257	5.62	28811.1	-	0.234039	Cluster1
TraesCS1A02G262200.1	1A	TraesCS1A02G262200	456924749	456931844	+	Alfin-like	3	2671	219	5.53	24973.1	TO:0000495:chlorophyll content	0.277958	Cluster1
TraesCS1B02G129400.1	1B	TraesCS1B02G129400	159631936	159638274	-	Alfin-like	6	1281	257	5.62	28781	-	0.323135	Cluster1
TraesCS1B02G272800.1	1B	TraesCS1B02G272800	478708742	478716064	+	Alfin-like	4	1352	206	6.75	23208.4	TO:0000495:chlorophyll content	0.289859	Cluster1
TraesCS1D02G111700.1	1D	TraesCS1D02G111700	107172112	107176808	+	Alfin-like	6	995	257	5.62	28781	-	0.266551	Cluster2
TraesCS1D02G262200.1	1D	TraesCS1D02G262200	356135856	356142481	+	Alfin-like	5	1346	262	5.45	29545.2	TO:0000495:chlorophyll content	0.280447	Cluster1
TraesCS2A02G172100.1	2A	TraesCS2A02G172100	128251392	128256773	-	Alfin-like	5	1237	272	5.49	30062.4	TO:0000495:chlorophyll content	0.310192	Cluster1
TraesCS2B02G198500.1	2B	TraesCS2B02G198500	176167693	176172815	-	Alfin-like	5	1250	272	5.49	30032.4	TO:0000495:chlorophyll content	0.486047	Cluster1
TraesCS2D02G179400.1	2D	TraesCS2D02G179400	123213068	123218221	-	Alfin-like	5	1230	272	5.49	30032.4	TO:0000495:chlorophyll content	0.371757	Cluster1
TraesCS3A02G403600.1	3A	TraesCS3A02G403600	648854391	648859372	+	Alfin-like	5	1254	263	5.36	29523.1	TO:0000495:chlorophyll content	0.374117	Cluster1
TraesCS3B02G437100.1	3B	TraesCS3B02G437100	676206548	676211484	+	Alfin-like	5	1299	263	5.36	29523.1	TO:0000495:chlorophyll content	0.351994	Cluster2
TraesCS3D02G398800.1	3D	TraesCS3D02G398800	513882905	513887908	+	Alfin-like	5	1264	262	5.37	29410	TO:0000495:chlorophyll content	0.364862	Cluster1
TraesCS4A02G227900.1	4A	TraesCS4A02G227900	536202316	536211275	-	Alfin-like	5	1314	254	5.74	28585.1	TO:0000495:chlorophyll content	0.390289	Cluster1
TraesCS4B02G088200.1	4B	TraesCS4B02G088200	89285872	89294859	+	Alfin-like	5	1420	254	5.74	28558.1	TO:0000495:chlorophyll content	0.416899	Cluster1
TraesCS4D02G085300.1	4D	TraesCS4D02G085300	60119850	60129277	+	Alfin-like	5	1578	254	5.74	28585.1	TO:0000495:chlorophyll content	0.438536	Cluster1
TraesCS5B02G486600.1	5B	TraesCS5B02G486600	657883797	657887816	-	Alfin-like	5	1040	251	5.94	28397.7	TO:0000495:chlorophyll content	0.363343	Cluster2
TraesCS5D02G486400.1	5D	TraesCS5D02G486400	521521412	521525767	-	Alfin-like	5	1324	250	5.8	28334.6	TO:0000495:chlorophyll content	0.432029	Cluster2
TraesCS1A02G058400.1	1A	TraesCS1A02G058400	38728807	38733500	-	AP2/ERF-AP2	10	2217	510	6.58	55492.7	-	0.747343	Cluster7
TraesCS1A02G357800.1	1A	TraesCS1A02G357800	540134248	540135929	-	AP2/ERF-AP2	4	1375	413	9.15	44652.2	-	1	Cluster6
TraesCS1B02G076300.1	1B	TraesCS1B02G076300	59192914	59197530	+	AP2/ERF-AP2	10	2227	512	6.47	55729.9	-	0.832568	Cluster7
TraesCS1D02G059200.1	1D	TraesCS1D02G059200	39287710	39292285	-	AP2/ERF-AP2	10	2174	511	6.61	55674.9	-	0.671813	Cluster7
TraesCS1D02G362500.1	1D	TraesCS1D02G362500	444845403	444846959	-	AP2/ERF-AP2	4	1236	411	9.15	44524.1	-	0.928391	Cluster1
TraesCS2A02G267600.1	2A	TraesCS2A02G267600	428908059	428911931	+	AP2/ERF-AP2	7	2322	598	6.98	63536.1	-	0.853627	Cluster1
TraesCS2A02G505600.1	2A	TraesCS2A02G505600	733853915	733858319	-	AP2/ERF-AP2	9	2177	478	5.81	51787	-	0.77376	Cluster1
TraesCS2A02G514200.1	2A	TraesCS2A02G514200	738436440	738439082	-	AP2/ERF-AP2	10	1110	369	6.26	38629.6	-	0.534761	Cluster3
TraesCS2B02G268100.1	2B	TraesCS2B02G268100	361422652	361426297	-	AP2/ERF-AP2	7	2365	597	6.99	63337.9	-	0.853629	Cluster1
TraesCS2B02G378100.1	2B	TraesCS2B02G378100	541006184	541010425	+	AP2/ERF-AP2	9	2351	660	6.09	69652.2	-	0.857162	Cluster1
TraesCS2B02G534000.1	2B	TraesCS2B02G534000	730298365	730302983	-	AP2/ERF-AP2	9	2242	483	5.95	52143.4	-	0.787257	Cluster1
TraesCS2B02G542400.1	2B	TraesCS2B02G542400	740215359	740218373	+	AP2/ERF-AP2	10	1555	456	6.47	47756.4	-	0.505212	Cluster5
TraesCS2D02G256600.1	2D	TraesCS2D02G256600	311715447	311719061	+	AP2/ERF-AP2	7	2421	597	6.86	63613.1	-	0.858709	Cluster1
TraesCS2D02G357600.1	2D	TraesCS2D02G357600	459772289	459776600	+	AP2/ERF-AP2	9	2417	655	5.99	69376.9	-	0.847712	Cluster1
TraesCS2D02G506500.1	2D	TraesCS2D02G506500	600318433	600322117	-	AP2/ERF-AP2	8	1431	476	5.81	51401.5	-	0.956212	Cluster4
TraesCS2D02G515800.1	2D	TraesCS2D02G515800	606752469	606756015	-	AP2/ERF-AP2	10	2222	486	6.6	51070.2	-	0.681287	Cluster5
TraesCS3A02G395500.1	3A	TraesCS3A02G395500	642918422	642923266	+	AP2/ERF-AP2	9	2650	702	6.67	73677.2	-	0.905539	Cluster1
TraesCS3B02G368400.1	3B	TraesCS3B02G368400	580782603	580785431	+	AP2/ERF-AP2	7	1543	385	8.67	42669	-	0.918413	Cluster6
TraesCS3B02G427300.1	3B	TraesCS3B02G427300	666441768	666448134	+	AP2/ERF-AP2	10	2790	749	7.08	78657.8	-	0.914479	Cluster1
TraesCS3D02G330400.1	3D	TraesCS3D02G330400	442971488	442973787	+	AP2/ERF-AP2	6	1134	377	8.71	41558.5	-	0.966289	Cluster6
TraesCS3D02G389100.1	3D	TraesCS3D02G389100	504728169	504733856	+	AP2/ERF-AP2	10	2247	748	6.94	78494.6	-	0.915805	Cluster1
TraesCS4A02G011600.1	4A	TraesCS4A02G011600	6634296	6637822	-	AP2/ERF-AP2	9	2041	528	7.43	56370.4	-	0.810896	Cluster1
TraesCS4A02G060400.1	4A	TraesCS4A02G060400	57163130	57167196	+	AP2/ERF-AP2	9	2302	627	6.6	67531.8	-	0.891084	Cluster1
TraesCS4A02G123800.1	4A	TraesCS4A02G123800	156135118	156140811	-	AP2/ERF-AP2	8	1652	378	6.8	41228.2	-	0.850524	Cluster2
TraesCS4A02G395400.1	4A	TraesCS4A02G395400	670146027	670148458	-	AP2/ERF-AP2	5	1230	409	8.49	43765	-	0.990656	Cluster1
TraesCS4B02G136400.1	4B	TraesCS4B02G136400	179848236	179850147	-	AP2/ERF-AP2	6	993	330	7	36687.2	-	0.98668	Cluster7
TraesCS4B02G180600.1	4B	TraesCS4B02G180600	395605116	395609932	+	AP2/ERF-AP2	8	1128	375	7.8	40882.7	-	0.896902	Cluster2
TraesCS4B02G235900.1	4B	TraesCS4B02G235900	493527081	493531148	+	AP2/ERF-AP2	9	2302	631	6.6	68021.3	-	0.880335	Cluster1
TraesCS4B02G292900.1	4B	TraesCS4B02G292900	578223909	578227846	+	AP2/ERF-AP2	9	2059	528	7.75	56663.8	-	0.847944	Cluster1
TraesCS4D02G131200.1	4D	TraesCS4D02G131200	117732657	117734867	-	AP2/ERF-AP2	5	1463	355	8.01	39304.4	-	0.87828	Cluster6
TraesCS4D02G182100.1	4D	TraesCS4D02G182100	318285136	318292079	+	AP2/ERF-AP2	8	1671	376	6.76	41060.1	-	0.857644	Cluster2
TraesCS4D02G237300.1	4D	TraesCS4D02G237300	399530943	399535136	+	AP2/ERF-AP2	9	2405	630	6.6	67887.2	-	0.867802	Cluster1
TraesCS4D02G291300.1	4D	TraesCS4D02G291300	462743918	462748070	-	AP2/ERF-AP2	9	2446	526	8.07	56236.3	-	0.432684	Cluster6
TraesCS5A02G141700.1	5A	TraesCS5A02G141700	314663870	314668304	+	AP2/ERF-AP2	7	1521	428	5.64	46950.8	-	0.763492	Cluster1
TraesCS5A02G221600.1	5A	TraesCS5A02G221600	437912766	437916854	-	AP2/ERF-AP2	8	1665	396	6.43	43065.9	-	0.852718	Cluster6
TraesCS5A02G405400.1	5A	TraesCS5A02G405400	597254003	597257922	+	AP2/ERF-AP2	8	2509	629	6.5	66233.2	-	0.886422	Cluster1
TraesCS5A02G473800.1	5A	TraesCS5A02G473800	650127258	650130900	-	AP2/ERF-AP2	10	1758	447	6.68	48861.3	PO:0006343:axillary shoot system, PO:0009036:lodicule, PO:0009037:lemma, PO:0009039:glume, PO:0020048:microspore, PO:0009082:spikelet floret, TO:0000225:stamen number, TO:0000436:spikelet sterility	0.575985	Cluster6
TraesCS5B02G220400.1	5B	TraesCS5B02G220400	394743473	394748109	-	AP2/ERF-AP2	7	1808	394	6.43	42805.6	-	0.784853	Cluster6
TraesCS5B02G410200.1	5B	TraesCS5B02G410200	585472766	585476384	+	AP2/ERF-AP2	8	2211	628	6.67	66037	-	0.923711	Cluster6
TraesCS5D02G150500.1	5D	TraesCS5D02G150500	239277408	239281850	-	AP2/ERF-AP2	7	1519	427	5.46	46758.7	-	0.762104	Cluster1
TraesCS5D02G229400.1	5D	TraesCS5D02G229400	336422253	336426483	-	AP2/ERF-AP2	8	1745	396	6.57	42972.8	-	0.757593	Cluster2
TraesCS5D02G415500.1	5D	TraesCS5D02G415500	477983623	477987069	+	AP2/ERF-AP2	8	2077	626	6.75	65599.6	-	0.944167	Cluster6
TraesCS5D02G486600.1	5D	TraesCS5D02G486600	521712820	521716475	-	AP2/ERF-AP2	10	1749	448	6.71	49001.5	PO:0006343:axillary shoot system, PO:0009036:lodicule, PO:0009037:lemma, PO:0009039:glume, PO:0020048:microspore, PO:0009082:spikelet floret, TO:0000225:stamen number, TO:0000436:spikelet sterility	0.474292	Cluster5
TraesCS6A02G125700.1	6A	TraesCS6A02G125700	99062693	99067677	-	AP2/ERF-AP2	7	1050	349	9.47	38394	-	0.937489	Cluster6
TraesCS6A02G229500.1	6A	TraesCS6A02G229500	432253328	432258184	-	AP2/ERF-AP2	9	2426	659	5.84	70613.5	-	0.874881	Cluster1
TraesCS6A02G306300.1	6A	TraesCS6A02G306300	540042373	540047793	+	AP2/ERF-AP2	8	2044	372	5.28	40555.8	-	0.393938	Cluster3
TraesCS6B02G153800.1	6B	TraesCS6B02G153800	157554399	157559854	-	AP2/ERF-AP2	7	1014	337	9.22	37602.7	-	0.954566	Cluster4
TraesCS6B02G158500.1	6B	TraesCS6B02G158500	160922400	160923617	-	AP2/ERF-AP2	1	1218	293	5.93	31195.5	-	0.921386	Cluster2
TraesCS6B02G252000.1	6B	TraesCS6B02G252000	452171125	452177168	+	AP2/ERF-AP2	8	2200	662	5.77	70407.1	-	0.93114	Cluster1
TraesCS6B02G334700.1	6B	TraesCS6B02G334700	588831559	588836560	+	AP2/ERF-AP2	9	2027	375	5.7	40946.4	-	0.315385	Cluster3
TraesCS6D02G205300.1	6D	TraesCS6D02G205300	291231588	291236709	+	AP2/ERF-AP2	10	2445	661	5.74	70628.4	-	0.872782	Cluster1
TraesCS6D02G285400.1	6D	TraesCS6D02G285400	393651379	393656482	+	AP2/ERF-AP2	8	2060	372	5.36	40665	-	0.288175	Cluster3
TraesCS7A02G095100.1	7A	TraesCS7A02G095100	57978439	57981439	-	AP2/ERF-AP2	5	1439	408	8.69	43609.8	-	0.98851	Cluster1
TraesCS7A02G292900.1	7A	TraesCS7A02G292900	370540636	370543534	+	AP2/ERF-AP2	8	1610	387	5.25	42260.1	-	0.264408	Cluster3
TraesCS7A02G495800.1	7A	TraesCS7A02G495800	686019255	686022221	-	AP2/ERF-AP2	9	1722	469	6.05	50664.6	-	0.903712	Cluster1
TraesCS7B02G186900.1	7B	TraesCS7B02G186900	312441078	312443860	-	AP2/ERF-AP2	8	1495	353	5.65	38438.9	-	0.288575	Cluster3
TraesCS7B02G401400.1	7B	TraesCS7B02G401400	667746817	667749787	+	AP2/ERF-AP2	9	1706	467	6.01	50423.4	-	0.881758	Cluster1
TraesCS7B02G440400.1	7B	TraesCS7B02G440400	705964884	705967724	-	AP2/ERF-AP2	10	1777	405	7.71	43700	-	0.960041	Cluster6
TraesCS7D02G091100.1	7D	TraesCS7D02G091100	54437323	54439758	-	AP2/ERF-AP2	5	1233	410	8.2	43817	-	0.980634	Cluster2
TraesCS7D02G292500.1	7D	TraesCS7D02G292500	358473307	358476106	+	AP2/ERF-AP2	8	1510	351	5.78	38291.7	-	0.477949	Cluster1
TraesCS7D02G483200.1	7D	TraesCS7D02G483200	593236383	593239374	-	AP2/ERF-AP2	9	1763	469	6.01	50629.6	-	0.867834	Cluster1
TraesCS7D02G512600.1	7D	TraesCS7D02G512600	614165669	614168999	-	AP2/ERF-AP2	10	2281	434	9.11	46380.1	-	0.946857	Cluster6
TraesCS1A02G141800.1	1A	TraesCS1A02G141800	241377201	241377560	-	AP2/ERF-ERF	1	360	119	5.24	12618.8	-	-	#N/A
TraesCS1A02G187900.1	1A	TraesCS1A02G187900	339097721	339099065	-	AP2/ERF-ERF	1	1345	190	5.07	20387.8	PO:0020122:inflorescence axis	0.911144	Cluster6
TraesCS1A02G218100.1	1A	TraesCS1A02G218100	386479232	386480418	-	AP2/ERF-ERF	1	1187	236	5.5	26381.7	-	0.69944	Cluster5
TraesCS1A02G220000.1	1A	TraesCS1A02G220000	388849047	388850291	+	AP2/ERF-ERF	1	1245	282	4.74	29815.8	-	0.836652	Cluster6
TraesCS1A02G221900.1	1A	TraesCS1A02G221900	391256779	391259159	-	AP2/ERF-ERF	3	1509	407	5.01	44449	-	0.299814	Cluster7
TraesCS1A02G223400.1	1A	TraesCS1A02G223400	393612319	393613101	+	AP2/ERF-ERF	1	783	260	9.15	27741	PO:0020149:quiescent center	0.842369	Cluster1
TraesCS1A02G231200.1	1A	TraesCS1A02G231200	403830277	403831326	-	AP2/ERF-ERF	2	920	180	7.83	18775.2	-	0.628605	Cluster1
TraesCS1A02G242800.1	1A	TraesCS1A02G242800	430617268	430622212	+	AP2/ERF-ERF	9	1257	418	9.12	45898.8	-	0.670465	Cluster1
TraesCS1A02G244800.1	1A	TraesCS1A02G244800	432852085	432853063	+	AP2/ERF-ERF	1	979	232	5.91	24456.4	-	0.909856	Cluster7
TraesCS1A02G263100.1	1A	TraesCS1A02G263100	458510480	458511031	-	AP2/ERF-ERF	1	552	183	8.55	18898.2	-	0.965151	Cluster4
TraesCS1A02G272300.1	1A	TraesCS1A02G272300	465495668	465497672	+	AP2/ERF-ERF	2	1308	321	5.09	32742.7	-	0.978772	Cluster4
TraesCS1A02G314200.1	1A	TraesCS1A02G314200	505680794	505681360	-	AP2/ERF-ERF	1	567	188	10.43	20357	PO:0009062:gynoecium	0.887374	Cluster6
TraesCS1A02G314300.1	1A	TraesCS1A02G314300	505924971	505926207	-	AP2/ERF-ERF	1	1237	236	8.87	24220	PO:0025034:leaf	0.571862	Cluster2
TraesCS1A02G328800.1	1A	TraesCS1A02G328800	517519807	517520544	+	AP2/ERF-ERF	1	738	245	8.5	25990.9	-	0.923622	Cluster4
TraesCS1A02G370400.1	1A	TraesCS1A02G370400	547863784	547865124	+	AP2/ERF-ERF	1	1341	260	7.62	28512.2	-	0.942187	Cluster4
TraesCS1A02G370600.1	1A	TraesCS1A02G370600	547886643	547887899	+	AP2/ERF-ERF	1	1257	256	5.69	27792	-	0.87703	Cluster4
TraesCS1A02G370700.1	1A	TraesCS1A02G370700	547907223	547908642	-	AP2/ERF-ERF	1	1420	265	5.99	28656.9	-	0.867713	Cluster4
TraesCS1A02G399500.1	1A	TraesCS1A02G399500	564039745	564040901	-	AP2/ERF-ERF	1	1157	290	7.92	31497.3	-	0.919017	Cluster1
TraesCS1A02G411100.1	1A	TraesCS1A02G411100	571893799	571895896	-	AP2/ERF-ERF	2	2026	285	9.86	31018.8	-	0.860845	Cluster2
TraesCS1B02G158400.1	1B	TraesCS1B02G158400	268899061	268899420	-	AP2/ERF-ERF	1	360	119	5.24	12636.9	-	1	Cluster4
TraesCS1B02G195700.1	1B	TraesCS1B02G195700	350875711	350876696	-	AP2/ERF-ERF	1	986	197	5.02	21180.7	PO:0020122:inflorescence axis	0.947738	Cluster6
TraesCS1B02G231500.1	1B	TraesCS1B02G231500	415743802	415744572	-	AP2/ERF-ERF	1	771	256	6	28052.5	-	0.675861	Cluster5
TraesCS1B02G233300.1	1B	TraesCS1B02G233300	418821112	418822477	+	AP2/ERF-ERF	1	1366	275	4.72	29384.4	-	0.891536	Cluster6
TraesCS1B02G235100.1	1B	TraesCS1B02G235100	421096799	421100560	-	AP2/ERF-ERF	2	1431	341	4.88	37242.3	-	0.237973	Cluster3
TraesCS1B02G236700.1	1B	TraesCS1B02G236700	423823534	423824304	+	AP2/ERF-ERF	1	771	256	9.12	27117.2	PO:0020149:quiescent center	0.887846	Cluster1
TraesCS1B02G243200.1	1B	TraesCS1B02G243200	432116599	432117724	+	AP2/ERF-ERF	2	926	185	8.81	19238.6	-	0.710929	Cluster2
TraesCS1B02G254300.1	1B	TraesCS1B02G254300	448525597	448532139	+	AP2/ERF-ERF	10	1770	422	9.12	46262.2	-	0.707814	Cluster1
TraesCS1B02G256000.1	1B	TraesCS1B02G256000	451134276	451135517	+	AP2/ERF-ERF	2	1095	230	5.91	24299.2	-	0.927913	Cluster1
TraesCS1B02G273700.1	1B	TraesCS1B02G273700	480826056	480826897	-	AP2/ERF-ERF	1	842	181	8.95	18985.3	-	0.971778	Cluster4
TraesCS1B02G282300.1	1B	TraesCS1B02G282300	491231072	491233471	+	AP2/ERF-ERF	2	1437	323	5.08	33215.1	-	0.838323	Cluster1
TraesCS1B02G307000.1	1B	TraesCS1B02G307000	530045461	530048165	+	AP2/ERF-ERF	3	1186	385	5.66	42114.8	-	0.788166	Cluster1
TraesCS1B02G326500.1	1B	TraesCS1B02G326500	551869725	551870279	-	AP2/ERF-ERF	1	555	184	10.26	19917.5	PO:0009062:gynoecium	0.893724	Cluster6
TraesCS1B02G326600.1	1B	TraesCS1B02G326600	552473380	552474529	-	AP2/ERF-ERF	1	1150	240	8.87	24430.2	PO:0025034:leaf	0.560193	Cluster4
TraesCS1B02G335100.1	1B	TraesCS1B02G335100	562432802	562433838	-	AP2/ERF-ERF	2	919	222	6.53	24392.5	-	0.955294	Cluster6
TraesCS1B02G342500.1	1B	TraesCS1B02G342500	570525909	570526718	+	AP2/ERF-ERF	1	810	269	8.32	28489.9	-	0.958523	Cluster6
TraesCS1B02G389700.1	1B	TraesCS1B02G389700	623672473	623673479	+	AP2/ERF-ERF	1	1007	251	5.25	27306.6	-	0.894323	Cluster4
TraesCS1B02G389800.1	1B	TraesCS1B02G389800	623679499	623680818	+	AP2/ERF-ERF	1	1320	259	8.47	28202.7	-	0.897203	Cluster4
TraesCS1B02G389900.1	1B	TraesCS1B02G389900	623688073	623689509	-	AP2/ERF-ERF	2	1004	267	5.62	28802.1	-	0.865646	Cluster4
TraesCS1B02G427500.1	1B	TraesCS1B02G427500	652924921	652925848	-	AP2/ERF-ERF	1	928	282	7.04	30443	-	0.968183	Cluster4
TraesCS1B02G427600.1	1B	TraesCS1B02G427600	653038941	653039813	-	AP2/ERF-ERF	1	873	290	6.14	31488.1	-	0.988858	Cluster4
TraesCS1B02G441300.1	1B	TraesCS1B02G441300	662192978	662194258	-	AP2/ERF-ERF	2	1249	282	9.79	30703.5	-	0.869519	Cluster6
TraesCS1D02G140900.1	1D	TraesCS1D02G140900	194201765	194202124	-	AP2/ERF-ERF	1	360	119	5.53	12631.8	-	-	#N/A
TraesCS1D02G188700.1	1D	TraesCS1D02G188700	261206913	261207515	+	AP2/ERF-ERF	1	603	200	4.87	21419.8	PO:0020122:inflorescence axis	0.950315	Cluster6
TraesCS1D02G221500.1	1D	TraesCS1D02G221500	309087830	309088666	+	AP2/ERF-ERF	1	837	278	4.69	29601.6	-	0.851093	Cluster6
TraesCS1D02G223600.1	1D	TraesCS1D02G223600	311366169	311369554	-	AP2/ERF-ERF	2	1429	344	4.93	37532.6	-	0.30121	Cluster3
TraesCS1D02G225000.1	1D	TraesCS1D02G225000	313617470	313618243	+	AP2/ERF-ERF	1	774	257	9.12	27247.3	PO:0020149:quiescent center	0.899226	Cluster1
TraesCS1D02G230900.1	1D	TraesCS1D02G230900	319429401	319430475	+	AP2/ERF-ERF	2	892	184	6.63	19321.7	-	0.648474	Cluster1
TraesCS1D02G242800.1	1D	TraesCS1D02G242800	332996355	333002440	+	AP2/ERF-ERF	10	1675	422	9.12	46290.3	-	0.740614	Cluster1
TraesCS1D02G244500.1	1D	TraesCS1D02G244500	335287142	335287837	+	AP2/ERF-ERF	1	696	231	5.92	24328.2	-	0.934729	Cluster1
TraesCS1D02G263200.1	1D	TraesCS1D02G263200	357437888	357438448	-	AP2/ERF-ERF	1	561	186	7.84	19365.7	-	0.967316	Cluster4
TraesCS1D02G272600.1	1D	TraesCS1D02G272600	366475114	366476973	-	AP2/ERF-ERF	2	972	323	5.32	33139.2	-	0.96943	Cluster4
TraesCS1D02G314700.1	1D	TraesCS1D02G314700	409798580	409799369	-	AP2/ERF-ERF	1	790	184	10.08	19757.3	PO:0009062:gynoecium	0.818434	Cluster6
TraesCS1D02G314800.1	1D	TraesCS1D02G314800	410071174	410072405	-	AP2/ERF-ERF	1	1232	236	8.87	24242.1	PO:0025034:leaf	0.569492	Cluster2
TraesCS1D02G331100.1	1D	TraesCS1D02G331100	421226124	421227361	+	AP2/ERF-ERF	1	1238	279	9.54	29265.7	-	0.939724	Cluster7
TraesCS1D02G331200.1	1D	TraesCS1D02G331200	421464934	421465644	+	AP2/ERF-ERF	1	711	236	8.91	24784.7	-	0.998398	Cluster4
TraesCS1D02G376500.1	1D	TraesCS1D02G376500	453134529	453135796	+	AP2/ERF-ERF	1	1268	271	5.53	29636.4	-	0.891825	Cluster4
TraesCS1D02G376600.1	1D	TraesCS1D02G376600	453181576	453182804	+	AP2/ERF-ERF	1	1229	265	4.98	28969.4	-	0.860245	Cluster4
TraesCS1D02G376700.1	1D	TraesCS1D02G376700	453199514	453200733	+	AP2/ERF-ERF	1	1220	266	6	28747.1	-	0.856311	Cluster4
TraesCS1D02G376800.1	1D	TraesCS1D02G376800	453209874	453211347	-	AP2/ERF-ERF	1	1474	267	5.65	28867.2	-	0.85773	Cluster4
TraesCS1D02G407000.1	1D	TraesCS1D02G407000	470311161	470312000	-	AP2/ERF-ERF	1	840	279	6.93	30183.8	-	0.99229	Cluster4
TraesCS1D02G407100.1	1D	TraesCS1D02G407100	470338499	470339609	-	AP2/ERF-ERF	1	1111	290	9.19	31525.2	-	0.948295	Cluster1
TraesCS1D02G418900.1	1D	TraesCS1D02G418900	475980326	475981685	-	AP2/ERF-ERF	1	1360	283	9.74	30901.7	-	0.853531	Cluster2
TraesCS1D02G425800.1	1D	TraesCS1D02G425800	479342740	479343111	-	AP2/ERF-ERF	1	372	123	9.56	13989.9	-	-	#N/A
TraesCS2A02G041500.1	2A	TraesCS2A02G041500	16745853	16746524	+	AP2/ERF-ERF	1	672	223	6.32	24057.9	-	0.99934	Cluster4
TraesCS2A02G041600.1	2A	TraesCS2A02G041600	16750988	16751809	+	AP2/ERF-ERF	1	822	253	9.08	27139.4	-	1	Cluster6
TraesCS2A02G109800.1	2A	TraesCS2A02G109800	61488001	61488927	+	AP2/ERF-ERF	2	820	194	6.07	21538	-	0.914295	Cluster2
TraesCS2A02G116900.1	2A	TraesCS2A02G116900	66848645	66849948	+	AP2/ERF-ERF	1	1304	299	6.59	31694.7	PO:0000229:flower meristem, PO:0009062:gynoecium, PO:0007602:floral organ primordium development stage	0.929683	Cluster1
TraesCS2A02G185600.1	2A	TraesCS2A02G185600	146824168	146825463	-	AP2/ERF-ERF	1	1296	304	7.59	32478.5	-	0.646616	Cluster2
TraesCS2A02G282500.1	2A	TraesCS2A02G282500	473414199	473414780	+	AP2/ERF-ERF	1	582	193	5.46	23042.4	-	0.941058	Cluster4
TraesCS2A02G288000.1	2A	TraesCS2A02G288000	493832187	493834351	+	AP2/ERF-ERF	3	1244	251	9.61	26751.9	-	0.826178	Cluster5
TraesCS2A02G288700.1	2A	TraesCS2A02G288700	496562803	496563591	+	AP2/ERF-ERF	1	789	262	4.54	27701.1	-	0.968896	Cluster6
TraesCS2A02G310700.1	2A	TraesCS2A02G310700	534318127	534318660	-	AP2/ERF-ERF	1	534	177	5.06	19374.5	-	0.950017	Cluster6
TraesCS2A02G373700.1	2A	TraesCS2A02G373700	616992163	616993535	+	AP2/ERF-ERF	2	1365	454	9.21	48894.8	-	0.755922	Cluster5
TraesCS2A02G393500.1	2A	TraesCS2A02G393500	643230104	643231184	-	AP2/ERF-ERF	1	1081	280	6.37	30060.4	-	0.930739	Cluster7
TraesCS2A02G399500.1	2A	TraesCS2A02G399500	652570186	652571095	-	AP2/ERF-ERF	1	910	218	6.18	23744.5	PO:0009062:gynoecium	0.820762	Cluster7
TraesCS2A02G399600.1	2A	TraesCS2A02G399600	652594227	652594948	-	AP2/ERF-ERF	1	722	198	5.91	20562.9	-	0.843694	Cluster5
TraesCS2A02G415100.1	2A	TraesCS2A02G415100	672234346	672234990	-	AP2/ERF-ERF	1	645	214	5.49	22658.3	-	0.840307	Cluster2
TraesCS2A02G415200.1	2A	TraesCS2A02G415200	672265105	672265833	-	AP2/ERF-ERF	1	729	242	4.74	25873.8	-	0.944987	Cluster2
TraesCS2A02G415300.1	2A	TraesCS2A02G415300	672291703	672292796	-	AP2/ERF-ERF	1	1094	277	5.25	29117.1	-	0.792194	Cluster2
TraesCS2A02G417100.1	2A	TraesCS2A02G417100	673194842	673196226	-	AP2/ERF-ERF	1	1385	345	5.14	37025.3	-	0.900907	Cluster1
TraesCS2A02G417200.1	2A	TraesCS2A02G417200	673276475	673277485	-	AP2/ERF-ERF	1	1011	336	5.51	35913.3	-	0.980309	Cluster2
TraesCS2A02G417300.1	2A	TraesCS2A02G417300	673326836	673328368	+	AP2/ERF-ERF	1	1533	298	5.68	31376.1	-	0.621236	Cluster5
TraesCS2A02G427700.1	2A	TraesCS2A02G427700	680356634	680357869	-	AP2/ERF-ERF	1	1236	210	9.2	21441.5	-	0.520781	Cluster4
TraesCS2A02G463400.1	2A	TraesCS2A02G463400	709184809	709185790	-	AP2/ERF-ERF	1	982	252	8.62	26987.1	-	1	Cluster2
TraesCS2A02G503100.1	2A	TraesCS2A02G503100	732580211	732581104	+	AP2/ERF-ERF	2	766	157	8.76	17116.4	-	0.789591	Cluster2
TraesCS2A02G514300.1	2A	TraesCS2A02G514300	738921580	738923004	+	AP2/ERF-ERF	1	1425	243	9.43	25990.1	-	0.787652	Cluster4
TraesCS2A02G524600.1	2A	TraesCS2A02G524600	745388709	745389290	-	AP2/ERF-ERF	1	582	193	9.12	22887.5	-	-	#N/A
TraesCS2A02G542700.1	2A	TraesCS2A02G542700	753115291	753116653	-	AP2/ERF-ERF	1	1363	193	9.19	20031.7	-	0.721498	Cluster4
TraesCS2B02G002700.1	2B	TraesCS2B02G002700	1706362	1707167	+	AP2/ERF-ERF	1	806	190	4.85	20191.5	-	0.993003	Cluster4
TraesCS2B02G053900.1	2B	TraesCS2B02G053900	26348596	26349485	+	AP2/ERF-ERF	1	890	204	9.24	21878.6	-	0.994615	Cluster4
TraesCS2B02G054000.1	2B	TraesCS2B02G054000	26354237	26355125	+	AP2/ERF-ERF	1	889	260	8.84	27741.9	-	0.975457	Cluster3
TraesCS2B02G054100.1	2B	TraesCS2B02G054100	26449222	26450133	+	AP2/ERF-ERF	1	912	199	9.4	21517.3	-	1	Cluster5
TraesCS2B02G127800.1	2B	TraesCS2B02G127800	95794615	95797096	+	AP2/ERF-ERF	2	2364	201	6.13	22660.1	-	0.894769	Cluster2
TraesCS2B02G136100.1	2B	TraesCS2B02G136100	103195663	103196586	+	AP2/ERF-ERF	1	924	307	6.66	32349.5	PO:0000229:flower meristem, PO:0009062:gynoecium, PO:0007602:floral organ primordium development stage	0.953477	Cluster6
TraesCS2B02G221700.1	2B	TraesCS2B02G221700	211613871	211615323	+	AP2/ERF-ERF	1	1453	307	7.59	32887.8	-	0.779716	Cluster2
TraesCS2B02G304800.1	2B	TraesCS2B02G304800	434099239	434101274	+	AP2/ERF-ERF	2	1606	253	9.73	26999.2	-	0.822783	Cluster5
TraesCS2B02G305500.1	2B	TraesCS2B02G305500	435629368	435630156	+	AP2/ERF-ERF	1	789	262	4.54	27707	-	0.982571	Cluster6
TraesCS2B02G327700.1	2B	TraesCS2B02G327700	469613350	469613883	-	AP2/ERF-ERF	1	534	177	5.16	19398.5	-	0.964993	Cluster6
TraesCS2B02G390800.1	2B	TraesCS2B02G390800	555384305	555386006	+	AP2/ERF-ERF	1	1702	454	8.79	48927.9	-	0.779891	Cluster3
TraesCS2B02G411500.1	2B	TraesCS2B02G411500	585756356	585757543	-	AP2/ERF-ERF	1	1188	279	6.46	30053.5	-	0.941434	Cluster6
TraesCS2B02G417500.1	2B	TraesCS2B02G417500	597002268	597002909	-	AP2/ERF-ERF	1	642	213	9.29	23251.3	PO:0009062:gynoecium	0.906561	Cluster7
TraesCS2B02G417600.1	2B	TraesCS2B02G417600	597224198	597225511	-	AP2/ERF-ERF	1	1314	198	5.91	20649.9	-	0.646069	Cluster3
TraesCS2B02G434100.1	2B	TraesCS2B02G434100	623869027	623870146	-	AP2/ERF-ERF	1	1120	214	5.49	22627.3	-	0.742215	Cluster2
TraesCS2B02G434200.1	2B	TraesCS2B02G434200	624286246	624287589	-	AP2/ERF-ERF	1	1344	239	4.81	25709.7	-	0.984732	Cluster4
TraesCS2B02G434300.1	2B	TraesCS2B02G434300	624354707	624355828	-	AP2/ERF-ERF	1	1122	275	5.16	28928	-	0.815171	Cluster1
TraesCS2B02G436100.1	2B	TraesCS2B02G436100	626650526	626652000	-	AP2/ERF-ERF	1	1475	341	5.05	36251.5	-	0.894038	Cluster1
TraesCS2B02G436200.1	2B	TraesCS2B02G436200	626883071	626884401	-	AP2/ERF-ERF	1	1331	335	5.88	35578.8	-	0.911897	Cluster1
TraesCS2B02G436300.1	2B	TraesCS2B02G436300	627073001	627074499	+	AP2/ERF-ERF	1	1499	290	5.68	30666.3	-	0.616164	Cluster6
TraesCS2B02G448100.1	2B	TraesCS2B02G448100	640764275	640765476	-	AP2/ERF-ERF	1	1202	219	7.9	22278.4	-	0.561725	Cluster4
TraesCS2B02G485200.1	2B	TraesCS2B02G485200	682226357	682227381	-	AP2/ERF-ERF	1	1025	249	6.71	26835.2	-	0.998095	Cluster4
TraesCS2B02G485400.1	2B	TraesCS2B02G485400	682572757	682573515	-	AP2/ERF-ERF	1	759	252	9.59	26887.3	-	1	Cluster4
TraesCS2B02G529200.1	2B	TraesCS2B02G529200	723962714	723963618	+	AP2/ERF-ERF	1	905	193	8.93	21397.1	-	0.905414	Cluster2
TraesCS2B02G530800.1	2B	TraesCS2B02G530800	726135808	726136590	+	AP2/ERF-ERF	2	659	151	7.69	16618.9	-	0.974964	Cluster1
TraesCS2B02G531100.1	2B	TraesCS2B02G531100	726545695	726546716	+	AP2/ERF-ERF	2	883	155	8.66	16964.3	-	0.703522	Cluster3
TraesCS2B02G542300.1	2B	TraesCS2B02G542300	739368363	739370249	-	AP2/ERF-ERF	1	1887	245	9.81	26086.3	-	0.76334	Cluster4
TraesCS2B02G572500.1	2B	TraesCS2B02G572500	762213310	762214734	-	AP2/ERF-ERF	1	1425	191	9.19	19957.5	-	0.730042	Cluster4
TraesCS2D02G015200.1	2D	TraesCS2D02G015200	7227297	7228142	-	AP2/ERF-ERF	1	846	191	4.93	20573.7	-	0.968864	Cluster2
TraesCS2D02G039800.1	2D	TraesCS2D02G039800	14443231	14443818	+	AP2/ERF-ERF	1	588	195	9.6	20914.5	-	1	Cluster4
TraesCS2D02G040100.1	2D	TraesCS2D02G040100	14642259	14642864	+	AP2/ERF-ERF	1	606	201	8.73	21625.5	-	-	#N/A
TraesCS2D02G040200.1	2D	TraesCS2D02G040200	14647515	14648285	+	AP2/ERF-ERF	1	771	256	8.45	27142.2	-	0.975518	Cluster4
TraesCS2D02G040300.1	2D	TraesCS2D02G040300	14711769	14712380	+	AP2/ERF-ERF	1	612	203	6.32	21925.5	-	0.908869	Cluster4
TraesCS2D02G110000.1	2D	TraesCS2D02G110000	61021444	61022517	+	AP2/ERF-ERF	2	962	199	6.16	22043.5	-	0.917819	Cluster2
TraesCS2D02G118200.1	2D	TraesCS2D02G118200	67496011	67496898	-	AP2/ERF-ERF	1	888	295	6.45	31286.2	PO:0000229:flower meristem, PO:0009062:gynoecium, PO:0007602:floral organ primordium development stage	0.976998	Cluster6
TraesCS2D02G202100.1	2D	TraesCS2D02G202100	154170793	154172088	+	AP2/ERF-ERF	1	1296	306	7.59	32586.5	-	0.707763	Cluster2
TraesCS2D02G286300.1	2D	TraesCS2D02G286300	365778049	365782480	+	AP2/ERF-ERF	4	1367	253	9.55	26961.1	-	0.788594	Cluster5
TraesCS2D02G286900.1	2D	TraesCS2D02G286900	367089039	367089827	+	AP2/ERF-ERF	1	789	262	4.56	27789.2	-	0.937183	Cluster6
TraesCS2D02G300700.1	2D	TraesCS2D02G300700	383093295	383094206	-	AP2/ERF-ERF	1	912	261	9.78	27106.6	-	0.885197	Cluster5
TraesCS2D02G308900.1	2D	TraesCS2D02G308900	396424659	396425579	-	AP2/ERF-ERF	1	921	177	5.57	19411.6	-	0.890033	Cluster6
TraesCS2D02G369900.1	2D	TraesCS2D02G369900	474511766	474513405	+	AP2/ERF-ERF	1	1640	455	9.01	48875.8	-	0.864067	Cluster5
TraesCS2D02G391400.1	2D	TraesCS2D02G391400	498531944	498533001	-	AP2/ERF-ERF	1	1058	279	6.35	29886.2	-	0.91931	Cluster7
TraesCS2D02G397000.1	2D	TraesCS2D02G397000	508063150	508064078	-	AP2/ERF-ERF	1	929	217	7.05	23471.4	PO:0009062:gynoecium	0.850657	Cluster4
TraesCS2D02G397100.1	2D	TraesCS2D02G397100	508092003	508093300	-	AP2/ERF-ERF	1	1298	198	5.91	20592.9	-	0.667327	Cluster3
TraesCS2D02G412200.1	2D	TraesCS2D02G412200	527003686	527004330	-	AP2/ERF-ERF	1	645	214	5.49	22625.3	-	0.846132	Cluster2
TraesCS2D02G412300.1	2D	TraesCS2D02G412300	527271990	527272712	-	AP2/ERF-ERF	1	723	240	4.7	25736.8	-	0.969869	Cluster4
TraesCS2D02G412400.1	2D	TraesCS2D02G412400	527293094	527294128	-	AP2/ERF-ERF	1	1035	273	5.24	28609.6	-	0.850125	Cluster2
TraesCS2D02G414300.1	2D	TraesCS2D02G414300	528472502	528473867	-	AP2/ERF-ERF	1	1366	343	5.23	36588.9	-	0.886757	Cluster1
TraesCS2D02G414500.1	2D	TraesCS2D02G414500	528588877	528590154	-	AP2/ERF-ERF	1	1278	336	5.89	35912.2	-	0.945545	Cluster7
TraesCS2D02G414600.1	2D	TraesCS2D02G414600	528635190	528637621	+	AP2/ERF-ERF	2	2351	289	5.75	30589.2	-	0.603691	Cluster6
TraesCS2D02G425700.1	2D	TraesCS2D02G425700	538054304	538055427	-	AP2/ERF-ERF	1	1124	217	9.2	22065.2	-	0.543473	Cluster4
TraesCS2D02G464400.1	2D	TraesCS2D02G464400	570061956	570063114	-	AP2/ERF-ERF	1	1159	263	8.81	28245.8	-	0.988	Cluster4
TraesCS2D02G464600.1	2D	TraesCS2D02G464600	570088953	570089921	-	AP2/ERF-ERF	1	969	252	7.91	27386.6	-	1	Cluster4
TraesCS2D02G503100.1	2D	TraesCS2D02G503100	597322477	597323258	+	AP2/ERF-ERF	2	660	150	7.67	16511.9	-	-	#N/A
TraesCS2D02G503900.1	2D	TraesCS2D02G503900	598712612	598713618	+	AP2/ERF-ERF	2	864	156	8.76	17003.3	-	0.877405	Cluster2
TraesCS2D02G511600.1	2D	TraesCS2D02G511600	603137299	603142307	-	AP2/ERF-ERF	3	4547	1189	9.03	132787	-	-	#N/A
TraesCS2D02G515900.1	2D	TraesCS2D02G515900	607283456	607284936	+	AP2/ERF-ERF	1	1481	239	9.59	25710.8	-	0.891083	Cluster4
TraesCS2D02G543900.1	2D	TraesCS2D02G543900	621404177	621405692	-	AP2/ERF-ERF	1	1516	193	8.72	20057.5	-	0.716538	Cluster4
TraesCS3A02G041200.1	3A	TraesCS3A02G041200	21786689	21788782	+	AP2/ERF-ERF	2	1951	350	4.76	37231.7	-	0.358051	Cluster1
TraesCS3A02G087200.1	3A	TraesCS3A02G087200	56389147	56389793	-	AP2/ERF-ERF	1	647	193	6.04	22821.5	-	0.958845	Cluster7
TraesCS3A02G099200.1	3A	TraesCS3A02G099200	64028173	64030017	-	AP2/ERF-ERF	3	1040	278	7.65	30394.6	-	0.549868	Cluster1
TraesCS3A02G149000.1	3A	TraesCS3A02G149000	132581440	132582495	+	AP2/ERF-ERF	1	1056	351	4.59	38357.3	-	0.805828	Cluster2
TraesCS3A02G197400.1	3A	TraesCS3A02G197400	308674350	308674721	+	AP2/ERF-ERF	1	372	123	9.74	13958	-	-	#N/A
TraesCS3A02G238300.1	3A	TraesCS3A02G238300	445279609	445281322	-	AP2/ERF-ERF	1	1714	295	4.54	31477.3	-	0.907775	Cluster7
TraesCS3A02G291400.1	3A	TraesCS3A02G291400	521629276	521629836	+	AP2/ERF-ERF	1	561	186	9.87	18840.3	-	0.909316	Cluster5
TraesCS3A02G313100.1	3A	TraesCS3A02G313100	552640455	552641726	-	AP2/ERF-ERF	1	1272	327	6.18	34907.9	-	0.842495	Cluster2
TraesCS3A02G313900.1	3A	TraesCS3A02G313900	554021136	554021873	+	AP2/ERF-ERF	1	738	207	4.71	22028.3	-	1	Cluster4
TraesCS3A02G328000.1	3A	TraesCS3A02G328000	573112352	573113516	+	AP2/ERF-ERF	1	1165	247	9.01	25057.1	PO:0025034:leaf	0.62267	Cluster4
TraesCS3A02G328100.1	3A	TraesCS3A02G328100	573832334	573833504	+	AP2/ERF-ERF	1	1171	173	9.89	18116.5	PO:0009062:gynoecium	0.847459	Cluster4
TraesCS3A02G379900.1	3A	TraesCS3A02G379900	629227375	629228208	-	AP2/ERF-ERF	1	834	277	8.69	28824.4	-	0.870409	Cluster4
TraesCS3A02G404400.1	3A	TraesCS3A02G404400	649540667	649541242	-	AP2/ERF-ERF	1	576	191	5.82	19621.5	-	0.943052	Cluster4
TraesCS3B02G115400.1	3B	TraesCS3B02G115400	82039696	82053894	-	AP2/ERF-ERF	16	5533	1401	6.4	155805	-	0.501202	Cluster1
TraesCS3B02G158000.1	3B	TraesCS3B02G158000	152834816	152835610	-	AP2/ERF-ERF	1	795	223	4.83	23968.5	-	0.996043	Cluster4
TraesCS3B02G158800.1	3B	TraesCS3B02G158800	154195711	154197010	+	AP2/ERF-ERF	1	1300	345	6.22	37080.7	-	0.873496	Cluster2
TraesCS3B02G176200.1	3B	TraesCS3B02G176200	178927738	178928793	+	AP2/ERF-ERF	1	1056	351	4.66	38456.6	-	0.814818	Cluster2
TraesCS3B02G266800.1	3B	TraesCS3B02G266800	427589485	427591042	-	AP2/ERF-ERF	2	1431	293	4.53	31407.2	-	0.856281	Cluster6
TraesCS3B02G309800.1	3B	TraesCS3B02G309800	498354271	498354642	-	AP2/ERF-ERF	1	372	123	9.43	14043.9	-	1	Cluster3
TraesCS3B02G326000.1	3B	TraesCS3B02G326000	526938538	526939086	+	AP2/ERF-ERF	1	549	182	10.09	18620	-	0.908432	Cluster4
TraesCS3B02G357500.1	3B	TraesCS3B02G357500	567806997	567807728	+	AP2/ERF-ERF	1	732	243	9.24	24751.7	PO:0025034:leaf	0.657233	Cluster4
TraesCS3B02G357600.1	3B	TraesCS3B02G357600	568282829	568283613	+	AP2/ERF-ERF	1	785	174	9.88	18425.8	-	0.839202	Cluster4
TraesCS3B02G412500.1	3B	TraesCS3B02G412500	648745878	648749209	-	AP2/ERF-ERF	2	1733	386	5.87	39854.2	-	0.794457	Cluster4
TraesCS3B02G413300.1	3B	TraesCS3B02G413300	650351973	650352554	+	AP2/ERF-ERF	1	582	193	6.16	22831.6	-	0.810205	Cluster3
TraesCS3B02G437900.1	3B	TraesCS3B02G437900	676943838	676944586	-	AP2/ERF-ERF	1	749	188	6.31	19359.3	-	0.950726	Cluster4
TraesCS3D02G039000.1	3D	TraesCS3D02G039000	14554414	14556491	-	AP2/ERF-ERF	2	1961	346	4.78	36939.4	-	0.381288	Cluster1
TraesCS3D02G099500.1	3D	TraesCS3D02G099500	51089961	51102210	-	AP2/ERF-ERF	15	4938	1225	5.71	135846	-	0.695295	Cluster1
TraesCS3D02G140500.1	3D	TraesCS3D02G140500	101854705	101855448	-	AP2/ERF-ERF	1	744	223	5.1	24063.9	-	1	Cluster4
TraesCS3D02G141200.1	3D	TraesCS3D02G141200	103621253	103622350	+	AP2/ERF-ERF	1	1098	244	5.52	26103	-	0.865095	Cluster2
TraesCS3D02G157100.1	3D	TraesCS3D02G157100	124865301	124866995	+	AP2/ERF-ERF	1	1695	348	4.63	37895.8	-	0.737081	Cluster1
TraesCS3D02G238600.1	3D	TraesCS3D02G238600	330062052	330063710	-	AP2/ERF-ERF	1	1659	293	4.47	31324.1	-	0.764389	Cluster6
TraesCS3D02G291100.1	3D	TraesCS3D02G291100	401171166	401172261	+	AP2/ERF-ERF	1	1096	181	9.64	18476.8	-	0.853227	Cluster1
TraesCS3D02G321500.1	3D	TraesCS3D02G321500	434210827	434211962	+	AP2/ERF-ERF	1	1136	246	9.24	24977.9	PO:0025034:leaf	0.614945	Cluster4
TraesCS3D02G321700.1	3D	TraesCS3D02G321700	434895749	434896979	+	AP2/ERF-ERF	1	1231	173	10.07	18343.7	PO:0009062:gynoecium	0.794893	Cluster4
TraesCS3D02G372900.1	3D	TraesCS3D02G372900	486049480	486052634	-	AP2/ERF-ERF	2	1886	382	5.67	39148.4	-	0.839296	Cluster4
TraesCS3D02G399600.1	3D	TraesCS3D02G399600	514651388	514651957	-	AP2/ERF-ERF	1	570	189	5.65	19511.4	-	0.933852	Cluster4
TraesCS4A02G001300.1	4A	TraesCS4A02G001300	932349	933682	-	AP2/ERF-ERF	1	1334	340	6.4	36511.7	-	0.972071	Cluster7
TraesCS4A02G001400.1	4A	TraesCS4A02G001400	1076557	1076952	+	AP2/ERF-ERF	1	396	131	6.42	14623.9	-	1	Cluster6
TraesCS4A02G005400.1	4A	TraesCS4A02G005400	3276287	3278085	+	AP2/ERF-ERF	1	1799	330	4.56	35081.7	-	0.803565	Cluster4
TraesCS4A02G005500.1	4A	TraesCS4A02G005500	3341895	3343139	+	AP2/ERF-ERF	1	1245	296	4.45	31792	-	0.768134	Cluster4
TraesCS4A02G005600.1	4A	TraesCS4A02G005600	3370312	3371892	+	AP2/ERF-ERF	3	1435	316	5.41	33938.9	-	0.925786	Cluster4
TraesCS4A02G013600.1	4A	TraesCS4A02G013600	7749033	7749995	-	AP2/ERF-ERF	1	963	320	6.36	33395.2	-	0.974519	Cluster6
TraesCS4A02G035400.1	4A	TraesCS4A02G035400	27589178	27590317	+	AP2/ERF-ERF	2	1002	235	6.06	25848	-	0.758622	Cluster5
TraesCS4A02G088400.1	4A	TraesCS4A02G088400	93897441	93898455	-	AP2/ERF-ERF	1	1015	243	5.2	25098.8	-	0.862162	Cluster6
TraesCS4A02G181300.1	4A	TraesCS4A02G181300	456290171	456292378	+	AP2/ERF-ERF	5	1462	361	6.62	39819.7	-	0.886941	Cluster1
TraesCS4A02G193100.1	4A	TraesCS4A02G193100	474494136	474495065	+	AP2/ERF-ERF	1	930	309	8.68	32069.5	-	0.7915	Cluster4
TraesCS4A02G227400.1	4A	TraesCS4A02G227400	535818939	535819861	+	AP2/ERF-ERF	1	923	185	4.85	20319.8	-	0.972129	Cluster4
TraesCS4A02G236300.1	4A	TraesCS4A02G236300	545105545	545107103	-	AP2/ERF-ERF	1	1559	414	4.76	44383.7	PO:0003015:primary root differentiation zone	0.99071	Cluster4
TraesCS4A02G259200.1	4A	TraesCS4A02G259200	571971770	571972432	+	AP2/ERF-ERF	1	663	220	5.96	23239.9	-	-	#N/A
TraesCS4A02G314500.1	4A	TraesCS4A02G314500	604856731	604857654	+	AP2/ERF-ERF	1	924	209	6.71	22776.7	-	0.98838	Cluster4
TraesCS4A02G314600.1	4A	TraesCS4A02G314600	604940912	604941475	+	AP2/ERF-ERF	1	564	187	8.62	20400	-	0.992657	Cluster4
TraesCS4A02G326400.1	4A	TraesCS4A02G326400	613543124	613544389	-	AP2/ERF-ERF	2	1138	280	6.83	29624.1	-	0.942333	Cluster4
TraesCS4A02G412200.1	4A	TraesCS4A02G412200	684175530	684176105	-	AP2/ERF-ERF	1	576	191	8.5	20372.1	-	1	Cluster6
TraesCS4A02G416000.1	4A	TraesCS4A02G416000	685826784	685827155	+	AP2/ERF-ERF	1	372	123	6.37	13527	-	0.919158	Cluster1
TraesCS4A02G433200.1	4A	TraesCS4A02G433200	703931982	703933123	+	AP2/ERF-ERF	1	1142	228	5.77	23654.1	-	0.846203	Cluster4
TraesCS4A02G433300.1	4A	TraesCS4A02G433300	704153360	704154010	-	AP2/ERF-ERF	1	651	216	7.68	22846.7	-	0.901043	Cluster6
TraesCS4B02G001900.1	4B	TraesCS4B02G001900	1080301	1080693	-	AP2/ERF-ERF	1	393	130	6.07	14396.6	-	1	Cluster6
TraesCS4B02G002000.1	4B	TraesCS4B02G002000	1101906	1102898	+	AP2/ERF-ERF	1	993	330	6.67	35789.2	-	0.985186	Cluster7
TraesCS4B02G055500.1	4B	TraesCS4B02G055500	44082669	44083562	+	AP2/ERF-ERF	1	894	267	6.54	27978.2	-	0.991891	Cluster6
TraesCS4B02G078700.1	4B	TraesCS4B02G078700	75756840	75758295	+	AP2/ERF-ERF	1	1456	412	4.81	44237.5	PO:0003015:primary root differentiation zone	0.99159	Cluster4
TraesCS4B02G088900.1	4B	TraesCS4B02G088900	89929092	89929646	+	AP2/ERF-ERF	1	555	184	4.78	20295.8	-	0.966622	Cluster4
TraesCS4B02G122100.1	4B	TraesCS4B02G122100	144787319	144788311	-	AP2/ERF-ERF	1	993	330	8.83	34213.1	-	0.712587	Cluster6
TraesCS4B02G215800.1	4B	TraesCS4B02G215800	455615441	455616792	+	AP2/ERF-ERF	1	1352	243	5.33	25140.8	-	0.867757	Cluster2
TraesCS4B02G268100.1	4B	TraesCS4B02G268100	541910310	541911565	+	AP2/ERF-ERF	1	1256	264	5.98	28825.6	-	0.805179	Cluster5
TraesCS4B02G290100.1	4B	TraesCS4B02G290100	574948889	574949836	+	AP2/ERF-ERF	1	948	315	6.14	32974.7	-	0.979143	Cluster6
TraesCS4B02G299400.1	4B	TraesCS4B02G299400	585821390	585823024	-	AP2/ERF-ERF	3	1420	313	5.35	33550.5	-	0.906247	Cluster4
TraesCS4B02G299500.1	4B	TraesCS4B02G299500	585962983	585964402	-	AP2/ERF-ERF	3	1252	316	5.41	34055	-	0.92046	Cluster4
TraesCS4B02G299600.1	4B	TraesCS4B02G299600	586069128	586070377	-	AP2/ERF-ERF	1	1250	293	4.74	31586.9	-	0.848487	Cluster4
TraesCS4B02G299700.1	4B	TraesCS4B02G299700	586236466	586237476	-	AP2/ERF-ERF	1	1011	336	4.67	35956.6	-	0.562379	Cluster4
TraesCS4B02G312400.1	4B	TraesCS4B02G312400	602038622	602039362	-	AP2/ERF-ERF	1	741	246	6.5	26637.9	-	-	#N/A
TraesCS4B02G316800.1	4B	TraesCS4B02G316800	606755147	606755515	+	AP2/ERF-ERF	1	369	122	6.37	13453.9	-	0.943003	Cluster5
TraesCS4B02G354400.1	4B	TraesCS4B02G354400	646129250	646129816	-	AP2/ERF-ERF	1	567	188	5.04	19515.8	PO:0020122:inflorescence axis	0.906892	Cluster2
TraesCS4D02G001200.1	4D	TraesCS4D02G001200	738967	739353	+	AP2/ERF-ERF	1	387	128	6.42	14310.5	-	0.996941	Cluster6
TraesCS4D02G002400.1	4D	TraesCS4D02G002400	1288444	1290808	+	AP2/ERF-ERF	3	1725	574	7.63	62892.4	-	0.736703	Cluster6
TraesCS4D02G077500.1	4D	TraesCS4D02G077500	51608464	51609747	+	AP2/ERF-ERF	1	1284	410	4.7	44036.3	PO:0003015:primary root differentiation zone	0.997591	Cluster4
TraesCS4D02G087000.1	4D	TraesCS4D02G087000	62303659	62304525	+	AP2/ERF-ERF	1	867	185	4.85	20319.8	-	0.921272	Cluster6
TraesCS4D02G120200.1	4D	TraesCS4D02G120200	101388793	101390389	-	AP2/ERF-ERF	1	1597	305	8.66	31937.6	-	0.71189	Cluster4
TraesCS4D02G216300.1	4D	TraesCS4D02G216300	370530579	370531307	+	AP2/ERF-ERF	1	729	242	5.2	24936.6	-	0.861698	Cluster5
TraesCS4D02G267500.1	4D	TraesCS4D02G267500	438153023	438153868	+	AP2/ERF-ERF	1	846	281	6.24	30791.8	-	0.822911	Cluster5
TraesCS4D02G268700.1	4D	TraesCS4D02G268700	439772798	439773187	-	AP2/ERF-ERF	1	390	129	9.6	14345.4	-	-	#N/A
TraesCS4D02G289200.1	4D	TraesCS4D02G289200	460479727	460480686	+	AP2/ERF-ERF	1	960	319	6.36	33432.2	-	0.97694	Cluster6
TraesCS4D02G298400.1	4D	TraesCS4D02G298400	467635163	467636763	-	AP2/ERF-ERF	3	1407	315	5.19	33694.8	-	0.873304	Cluster4
TraesCS4D02G298600.1	4D	TraesCS4D02G298600	467949018	467950391	-	AP2/ERF-ERF	1	1374	342	4.6	36512.1	-	0.65145	Cluster4
TraesCS4D02G310000.1	4D	TraesCS4D02G310000	477362905	477363639	-	AP2/ERF-ERF	1	735	244	6.44	26367.5	-	-	#N/A
TraesCS4D02G313400.1	4D	TraesCS4D02G313400	479525172	479525540	+	AP2/ERF-ERF	1	369	122	5.62	13426.8	-	0.953435	Cluster5
TraesCS4D02G315000.1	4D	TraesCS4D02G315000	480920143	480920769	-	AP2/ERF-ERF	1	627	208	7.75	21996.8	-	-	#N/A
TraesCS4D02G348100.1	4D	TraesCS4D02G348100	502030741	502031277	-	AP2/ERF-ERF	1	537	178	5.13	18589.9	PO:0020122:inflorescence axis	0.893044	Cluster2
TraesCS5A02G065400.1	5A	TraesCS5A02G065400	70676153	70676518	-	AP2/ERF-ERF	1	366	121	6.59	13189.4	-	0.970613	Cluster5
TraesCS5A02G071300.1	5A	TraesCS5A02G071300	80154708	80156579	-	AP2/ERF-ERF	2	1317	417	4.39	45291	PO:0003015:primary root differentiation zone	0.969498	Cluster4
TraesCS5A02G112600.1	5A	TraesCS5A02G112600	219694819	219696861	-	AP2/ERF-ERF	2	1312	328	5.66	34124.5	-	0.965703	Cluster4
TraesCS5A02G174700.1	5A	TraesCS5A02G174700	367754507	367755446	-	AP2/ERF-ERF	1	940	227	6.96	24508.1	-	0.943844	Cluster6
TraesCS5A02G180800.1	5A	TraesCS5A02G180800	379353913	379354845	-	AP2/ERF-ERF	1	933	310	4.79	34417.7	-	0.482538	Cluster3
TraesCS5A02G215900.1	5A	TraesCS5A02G215900	432033398	432036973	-	AP2/ERF-ERF	3	1773	377	5.2	40538.4	-	0.435353	Cluster2
TraesCS5A02G238400.1	5A	TraesCS5A02G238400	454732609	454733787	+	AP2/ERF-ERF	1	1179	241	6.59	25372.2	-	0.925859	Cluster4
TraesCS5A02G308000.1	5A	TraesCS5A02G308000	520531612	520532355	-	AP2/ERF-ERF	1	744	247	7.12	26120.2	-	0.983787	Cluster2
TraesCS5A02G310000.1	5A	TraesCS5A02G310000	522066500	522067668	+	AP2/ERF-ERF	1	1169	290	4.53	30457.8	-	0.929229	Cluster7
TraesCS5A02G310100.1	5A	TraesCS5A02G310100	522082741	522083550	+	AP2/ERF-ERF	1	810	269	8.73	28742.3	-	0.947077	Cluster4
TraesCS5A02G310200.1	5A	TraesCS5A02G310200	522104268	522104906	+	AP2/ERF-ERF	1	639	212	6.91	22953.1	-	0.969346	Cluster4
TraesCS5A02G310400.1	5A	TraesCS5A02G310400	522123926	522124618	-	AP2/ERF-ERF	1	693	230	5.31	25464.2	-	-	#N/A
TraesCS5A02G310500.1	5A	TraesCS5A02G310500	522223637	522224855	+	AP2/ERF-ERF	1	1219	275	7.79	29234.5	-	0.885439	Cluster4
TraesCS5A02G310600.1	5A	TraesCS5A02G310600	522356755	522357704	-	AP2/ERF-ERF	1	950	225	5.21	25169.8	-	0.971526	Cluster1
TraesCS5A02G310700.1	5A	TraesCS5A02G310700	522425187	522426058	+	AP2/ERF-ERF	1	872	222	5.97	24221.4	-	0.908931	Cluster6
TraesCS5A02G310800.1	5A	TraesCS5A02G310800	522604914	522605561	-	AP2/ERF-ERF	1	648	215	9.12	23723.7	-	0.988673	Cluster7
TraesCS5A02G311000.1	5A	TraesCS5A02G311000	522868163	522868825	-	AP2/ERF-ERF	1	663	220	4.98	24580.2	-	1	Cluster6
TraesCS5A02G311100.1	5A	TraesCS5A02G311100	522882741	522883445	-	AP2/ERF-ERF	1	705	234	5.01	25129.4	PO:0020048:microspore	0.881452	Cluster6
TraesCS5A02G311300.1	5A	TraesCS5A02G311300	523015457	523016095	-	AP2/ERF-ERF	1	639	212	6.22	23278.4	-	0.866446	Cluster6
TraesCS5A02G311500.1	5A	TraesCS5A02G311500	523136705	523137421	+	AP2/ERF-ERF	1	717	238	5.38	25214.1	PO:0020048:microspore	0.948218	Cluster6
TraesCS5A02G311600.1	5A	TraesCS5A02G311600	523147896	523148920	-	AP2/ERF-ERF	1	1025	245	5.91	25741.5	PO:0020048:microspore	0.989902	Cluster4
TraesCS5A02G311700.1	5A	TraesCS5A02G311700	523450084	523450785	+	AP2/ERF-ERF	1	702	233	4.96	24448	PO:0020048:microspore	1	Cluster2
TraesCS5A02G311800.1	5A	TraesCS5A02G311800	523587327	523588067	-	AP2/ERF-ERF	1	741	246	4.68	26000.7	PO:0020048:microspore	0.867293	Cluster5
TraesCS5A02G311900.1	5A	TraesCS5A02G311900	523608682	523609634	-	AP2/ERF-ERF	1	953	239	5.02	25265.1	PO:0020048:microspore	0.918536	Cluster4
TraesCS5A02G312000.1	5A	TraesCS5A02G312000	523615616	523616562	-	AP2/ERF-ERF	1	947	242	4.95	25935.9	-	0.796664	Cluster4
TraesCS5A02G312400.1	5A	TraesCS5A02G312400	523878982	523879659	-	AP2/ERF-ERF	1	678	225	8.98	23513.2	-	0.983724	Cluster4
TraesCS5A02G314600.1	5A	TraesCS5A02G314600	525025721	525026755	+	AP2/ERF-ERF	2	954	204	6.44	22096	-	0.815285	Cluster2
TraesCS5A02G386100.1	5A	TraesCS5A02G386100	583686468	583687052	-	AP2/ERF-ERF	1	585	194	6.29	20214.5	-	0.918909	Cluster3
TraesCS5A02G424600.1	5A	TraesCS5A02G424600	609955125	609956658	-	AP2/ERF-ERF	1	1534	292	8.88	31925.7	-	0.571275	Cluster6
TraesCS5A02G468800.1	5A	TraesCS5A02G468800	646006202	646010969	-	AP2/ERF-ERF	4	1370	362	9.07	38176.4	-	0.299365	Cluster2
TraesCS5A02G523700.1	5A	TraesCS5A02G523700	684665984	684666517	-	AP2/ERF-ERF	1	534	177	4.99	18453.7	PO:0020122:inflorescence axis	0.916185	Cluster2
TraesCS5B02G072200.1	5B	TraesCS5B02G072200	83905409	83905897	-	AP2/ERF-ERF	1	489	121	6.59	13159.4	-	0.990038	Cluster6
TraesCS5B02G077300.1	5B	TraesCS5B02G077300	93211246	93212656	-	AP2/ERF-ERF	1	1411	416	4.45	44920.5	PO:0003015:primary root differentiation zone	0.841884	Cluster3
TraesCS5B02G118200.1	5B	TraesCS5B02G118200	208701414	208703518	+	AP2/ERF-ERF	2	1404	341	5.87	35526.2	-	0.967957	Cluster4
TraesCS5B02G178600.1	5B	TraesCS5B02G178600	326572514	326573661	-	AP2/ERF-ERF	1	1148	309	4.83	34192.5	-	0.390653	Cluster3
TraesCS5B02G193200.1	5B	TraesCS5B02G193200	348570451	348572272	-	AP2/ERF-ERF	2	1561	284	6.38	30580	-	0.361503	Cluster7
TraesCS5B02G214400.1	5B	TraesCS5B02G214400	387173279	387176604	-	AP2/ERF-ERF	3	1669	386	5	41642.5	-	0.37279	Cluster2
TraesCS5B02G236900.1	5B	TraesCS5B02G236900	417885840	417886872	+	AP2/ERF-ERF	1	1033	242	5.87	25664.5	-	0.905508	Cluster4
TraesCS5B02G304700.1	5B	TraesCS5B02G304700	488719269	488720038	-	AP2/ERF-ERF	1	770	192	6.36	22389.5	-	0.981484	Cluster4
TraesCS5B02G308400.1	5B	TraesCS5B02G308400	491173192	491173821	-	AP2/ERF-ERF	1	630	209	6.08	21801.4	-	1	Cluster1
TraesCS5B02G310800.1	5B	TraesCS5B02G310800	492782423	492783421	+	AP2/ERF-ERF	1	999	269	8.4	29053.5	-	0.913714	Cluster4
TraesCS5B02G311200.1	5B	TraesCS5B02G311200	492819504	492820187	-	AP2/ERF-ERF	1	684	227	5.19	25156.1	-	0.971157	Cluster4
TraesCS5B02G311300.1	5B	TraesCS5B02G311300	493085859	493086718	-	AP2/ERF-ERF	1	860	286	11.9	31508	-	0.841072	Cluster6
TraesCS5B02G311400.1	5B	TraesCS5B02G311400	493140553	493141218	+	AP2/ERF-ERF	1	666	221	11.65	23956.2	-	0.958066	Cluster6
TraesCS5B02G311500.1	5B	TraesCS5B02G311500	493159433	493159852	-	AP2/ERF-ERF	1	420	139	4.59	15015.7	-	0.965833	Cluster7
TraesCS5B02G311600.1	5B	TraesCS5B02G311600	493168269	493169247	-	AP2/ERF-ERF	1	979	202	8.62	22161.8	-	0.960643	Cluster7
TraesCS5B02G311700.1	5B	TraesCS5B02G311700	493285961	493286623	-	AP2/ERF-ERF	1	663	220	5.07	24631.5	-	0.940674	Cluster7
TraesCS5B02G311900.1	5B	TraesCS5B02G311900	493480369	493481322	-	AP2/ERF-ERF	1	954	234	5.03	25253.6	PO:0020048:microspore	0.913535	Cluster6
TraesCS5B02G312000.1	5B	TraesCS5B02G312000	493630369	493631231	-	AP2/ERF-ERF	1	863	214	6.53	23597.8	-	0.943596	Cluster6
TraesCS5B02G312100.1	5B	TraesCS5B02G312100	493673951	493674960	+	AP2/ERF-ERF	1	1010	239	5.12	25527.5	PO:0020048:microspore	0.948682	Cluster2
TraesCS5B02G312200.1	5B	TraesCS5B02G312200	493694642	493695611	-	AP2/ERF-ERF	1	970	245	5.74	25782.6	PO:0020048:microspore	0.981162	Cluster4
TraesCS5B02G312300.1	5B	TraesCS5B02G312300	493931307	493932282	+	AP2/ERF-ERF	1	976	233	4.96	24423.9	PO:0020048:microspore	0.995375	Cluster6
TraesCS5B02G312500.1	5B	TraesCS5B02G312500	494026199	494026933	-	AP2/ERF-ERF	1	735	244	5.18	26005	PO:0020048:microspore	0.881982	Cluster5
TraesCS5B02G312700.1	5B	TraesCS5B02G312700	494032899	494033794	-	AP2/ERF-ERF	1	896	235	4.86	24891.4	PO:0020048:microspore	0.791057	Cluster4
TraesCS5B02G312800.1	5B	TraesCS5B02G312800	494044571	494045570	-	AP2/ERF-ERF	1	1000	240	4.78	25123.8	PO:0020048:microspore	0.818108	Cluster4
TraesCS5B02G312900.1	5B	TraesCS5B02G312900	494295889	494296623	-	AP2/ERF-ERF	1	735	244	5.13	25619.4	PO:0020048:microspore	0.916898	Cluster4
TraesCS5B02G313000.1	5B	TraesCS5B02G313000	494315159	494316116	-	AP2/ERF-ERF	1	958	236	5.01	25332.1	-	0.784526	Cluster4
TraesCS5B02G313300.1	5B	TraesCS5B02G313300	495472687	495473580	-	AP2/ERF-ERF	1	894	226	8.83	23652.5	-	0.999292	Cluster4
TraesCS5B02G315500.1	5B	TraesCS5B02G315500	497504283	497505423	+	AP2/ERF-ERF	2	1054	207	5.73	22490.3	-	0.763487	Cluster2
TraesCS5B02G344200.1	5B	TraesCS5B02G344200	527335229	527341760	-	AP2/ERF-ERF	4	4625	1409	7.95	156242	-	-	#N/A
TraesCS5B02G391100.1	5B	TraesCS5B02G391100	570379862	570380458	-	AP2/ERF-ERF	1	597	198	5.79	20556.7	-	0.966247	Cluster3
TraesCS5B02G426600.1	5B	TraesCS5B02G426600	602339971	602342001	-	AP2/ERF-ERF	1	2031	294	6.24	32010.7	-	0.428502	Cluster6
TraesCS5B02G481300.1	5B	TraesCS5B02G481300	653806565	653809922	-	AP2/ERF-ERF	3	2056	351	9.39	37242.6	-	0.294816	Cluster2
TraesCS5B02G486900.1	5B	TraesCS5B02G486900	658092415	658095219	-	AP2/ERF-ERF	7	1124	261	6.59	28917.1	PO:0006343:axillary shoot system, PO:0009036:lodicule, PO:0009037:lemma, PO:0009039:glume, PO:0020048:microspore, PO:0009082:spikelet floret, TO:0000225:stamen number, TO:0000436:spikelet sterility	0.588424	Cluster5
TraesCS5B02G565300.1	5B	TraesCS5B02G565300	710313393	710314470	-	AP2/ERF-ERF	1	1078	247	8.61	26956.2	-	0.981202	Cluster4
TraesCS5B02G565400.1	5B	TraesCS5B02G565400	710325045	710326028	-	AP2/ERF-ERF	1	984	227	5.91	24440.3	-	0.992034	Cluster4
TraesCS5D02G076200.1	5D	TraesCS5D02G076200	75418939	75419304	-	AP2/ERF-ERF	1	366	121	7.88	13101.4	-	1	Cluster1
TraesCS5D02G083500.1	5D	TraesCS5D02G083500	87172472	87174033	-	AP2/ERF-ERF	1	1562	416	4.44	44901.6	PO:0003015:primary root differentiation zone	0.845799	Cluster3
TraesCS5D02G129400.1	5D	TraesCS5D02G129400	203057554	203059824	-	AP2/ERF-ERF	2	1603	327	5.57	33880.1	-	0.950197	Cluster4
TraesCS5D02G180900.1	5D	TraesCS5D02G180900	281169858	281170557	-	AP2/ERF-ERF	2	639	212	5.95	22164.3	-	0.946632	Cluster6
TraesCS5D02G185300.1	5D	TraesCS5D02G185300	287441394	287442543	-	AP2/ERF-ERF	1	1150	310	4.84	34356.8	-	0.612474	Cluster1
TraesCS5D02G200900.1	5D	TraesCS5D02G200900	304162641	304163495	-	AP2/ERF-ERF	2	759	252	8.99	27345.6	-	0.367153	Cluster3
TraesCS5D02G223700.1	5D	TraesCS5D02G223700	331402389	331406349	-	AP2/ERF-ERF	3	1889	381	5.12	40907.9	-	0.392039	Cluster2
TraesCS5D02G245300.1	5D	TraesCS5D02G245300	353795287	353796446	+	AP2/ERF-ERF	1	1160	246	5.88	26095	-	0.921491	Cluster4
TraesCS5D02G314400.1	5D	TraesCS5D02G314400	409007125	409008190	-	AP2/ERF-ERF	1	1066	246	7.12	25975.9	-	-	#N/A
TraesCS5D02G314900.1	5D	TraesCS5D02G314900	409357487	409358116	-	AP2/ERF-ERF	1	630	209	6.2	21604.3	-	0.954133	Cluster2
TraesCS5D02G317000.1	5D	TraesCS5D02G317000	410444168	410453625	+	AP2/ERF-ERF	2	834	277	4.39	28944.3	-	0.970605	Cluster7
TraesCS5D02G317100.1	5D	TraesCS5D02G317100	410490700	410491759	+	AP2/ERF-ERF	1	1060	269	8.76	28796.3	-	0.935527	Cluster7
TraesCS5D02G317200.1	5D	TraesCS5D02G317200	410539089	410539948	+	AP2/ERF-ERF	1	860	213	9.4	23127.5	-	0.9338	Cluster7
TraesCS5D02G317300.1	5D	TraesCS5D02G317300	410606272	410607215	-	AP2/ERF-ERF	1	944	230	5.03	25581.3	-	0.995246	Cluster6
TraesCS5D02G317400.1	5D	TraesCS5D02G317400	410620236	410621446	+	AP2/ERF-ERF	1	1211	275	8.58	29341.6	-	0.919958	Cluster7
TraesCS5D02G317500.1	5D	TraesCS5D02G317500	410637378	410638322	-	AP2/ERF-ERF	1	945	226	5.21	25355.1	-	0.997028	Cluster7
TraesCS5D02G317600.1	5D	TraesCS5D02G317600	410679528	410679968	+	AP2/ERF-ERF	1	441	146	4.36	15823	-	0.975187	Cluster7
TraesCS5D02G317700.1	5D	TraesCS5D02G317700	410842386	410843365	-	AP2/ERF-ERF	1	980	212	7.78	23336.2	-	0.985321	Cluster7
TraesCS5D02G317800.1	5D	TraesCS5D02G317800	410846205	410847270	-	AP2/ERF-ERF	1	1066	202	8.6	22142.7	-	0.981398	Cluster7
TraesCS5D02G318000.1	5D	TraesCS5D02G318000	410873087	410874393	-	AP2/ERF-ERF	1	1307	220	4.97	24470.2	-	0.96492	Cluster7
TraesCS5D02G318100.1	5D	TraesCS5D02G318100	410952213	410953177	-	AP2/ERF-ERF	1	965	234	5.12	25189.5	PO:0020048:microspore	0.913442	Cluster6
TraesCS5D02G318200.1	5D	TraesCS5D02G318200	411148693	411149483	-	AP2/ERF-ERF	1	791	231	4.9	24823	PO:0020048:microspore	0.898155	Cluster7
TraesCS5D02G318300.1	5D	TraesCS5D02G318300	411170222	411171113	-	AP2/ERF-ERF	1	892	214	6.22	23500.7	-	0.866011	Cluster7
TraesCS5D02G318400.1	5D	TraesCS5D02G318400	411196748	411197467	+	AP2/ERF-ERF	1	720	239	5	25247.1	PO:0020048:microspore	0.956635	Cluster4
TraesCS5D02G318500.1	5D	TraesCS5D02G318500	411225112	411225843	-	AP2/ERF-ERF	1	732	243	6.04	25501.3	PO:0020048:microspore	0.991443	Cluster4
TraesCS5D02G318600.1	5D	TraesCS5D02G318600	411627531	411629091	+	AP2/ERF-ERF	1	1561	233	4.88	24424.8	PO:0020048:microspore	-	#N/A
TraesCS5D02G318800.1	5D	TraesCS5D02G318800	411789797	411790773	-	AP2/ERF-ERF	1	977	240	5	25378.2	PO:0020048:microspore	0.861307	Cluster4
TraesCS5D02G318900.1	5D	TraesCS5D02G318900	411845139	411846097	-	AP2/ERF-ERF	1	959	238	4.83	25401.2	-	0.830777	Cluster4
TraesCS5D02G319200.1	5D	TraesCS5D02G319200	412147133	412147813	-	AP2/ERF-ERF	1	681	226	8.98	23667.5	-	0.99739	Cluster4
TraesCS5D02G320800.1	5D	TraesCS5D02G320800	412960358	412961419	+	AP2/ERF-ERF	2	974	198	6.44	21668.5	-	0.805108	Cluster2
TraesCS5D02G351000.1	5D	TraesCS5D02G351000	434724460	434725029	+	AP2/ERF-ERF	1	570	189	4.7	21895.1	-	-	#N/A
TraesCS5D02G396000.1	5D	TraesCS5D02G396000	463634831	463635430	-	AP2/ERF-ERF	1	600	199	6.42	20794.1	-	0.948882	Cluster5
TraesCS5D02G433100.1	5D	TraesCS5D02G433100	488899950	488901689	-	AP2/ERF-ERF	1	1740	293	6.07	32102.7	-	0.555215	Cluster6
TraesCS5D02G481700.1	5D	TraesCS5D02G481700	519431831	519436380	-	AP2/ERF-ERF	3	1490	318	9.15	33483.9	-	0.319231	Cluster2
TraesCS5D02G549200.1	5D	TraesCS5D02G549200	556423412	556424146	+	AP2/ERF-ERF	1	735	244	6.36	26382.4	-	0.922774	Cluster4
TraesCS6A02G097500.1	6A	TraesCS6A02G097500	64678666	64680638	-	AP2/ERF-ERF	2	1148	364	4.95	39848.5	-	0.954155	Cluster2
TraesCS6A02G097700.1	6A	TraesCS6A02G097700	64907108	64909506	-	AP2/ERF-ERF	3	1476	362	4.92	39656.3	-	0.888082	Cluster2
TraesCS6A02G131200.1	6A	TraesCS6A02G131200	103757983	103759076	-	AP2/ERF-ERF	1	1094	202	6.6	20694	-	0.672127	Cluster4
TraesCS6A02G171900.1	6A	TraesCS6A02G171900	183187835	183189111	+	AP2/ERF-ERF	1	1277	207	7.61	21413.2	-	0.45189	Cluster2
TraesCS6A02G181400.1	6A	TraesCS6A02G181400	206351480	206352593	-	AP2/ERF-ERF	2	983	205	9.12	21929.6	PO:0004707:fruit dehiscence zone, PO:0004711:axillary inflorescence bud	0.800874	Cluster2
TraesCS6A02G186400.1	6A	TraesCS6A02G186400	221554154	221554882	+	AP2/ERF-ERF	2	714	237	5.67	25432.4	PO:0020048:microspore	0.991493	Cluster2
TraesCS6A02G196500.1	6A	TraesCS6A02G196500	288405498	288414783	-	AP2/ERF-ERF	7	725	218	9.02	24831	-	0.524185	Cluster3
TraesCS6A02G208700.1	6A	TraesCS6A02G208700	376479701	376480600	+	AP2/ERF-ERF	1	900	299	6.45	32229.6	-	0.917177	Cluster1
TraesCS6A02G235100.1	6A	TraesCS6A02G235100	444673317	444675345	-	AP2/ERF-ERF	1	2029	461	8.38	49741.8	-	0.79634	Cluster6
TraesCS6A02G243300.1	6A	TraesCS6A02G243300	454710994	454712683	-	AP2/ERF-ERF	2	1576	272	5.96	28478.1	-	0.802288	Cluster4
TraesCS6A02G243500.1	6A	TraesCS6A02G243500	454934116	454935078	+	AP2/ERF-ERF	1	963	320	5.32	34203.2	-	0.936017	Cluster4
TraesCS6A02G250900.1	6A	TraesCS6A02G250900	465231623	465232659	+	AP2/ERF-ERF	1	1037	253	5.28	26636.2	-	0.889678	Cluster2
TraesCS6A02G251000.1	6A	TraesCS6A02G251000	465316435	465317444	+	AP2/ERF-ERF	1	1010	228	5.33	24385.1	-	0.925245	Cluster6
TraesCS6A02G251100.1	6A	TraesCS6A02G251100	465389653	465390330	+	AP2/ERF-ERF	1	678	225	5.74	23363.8	-	0.792892	Cluster2
TraesCS6A02G256600.1	6A	TraesCS6A02G256600	477516232	477517014	-	AP2/ERF-ERF	1	783	260	5.35	26948.7	-	0.871526	Cluster4
TraesCS6A02G256900.1	6A	TraesCS6A02G256900	479042591	479043756	+	AP2/ERF-ERF	1	1166	217	5.15	23195.9	PO:0009062:gynoecium	0.724655	Cluster7
TraesCS6A02G301900.1	6A	TraesCS6A02G301900	535402547	535404447	-	AP2/ERF-ERF	2	1724	328	6.66	35229.4	-	0.47218	Cluster3
TraesCS6A02G319500.1	6A	TraesCS6A02G319500	554855518	554856668	+	AP2/ERF-ERF	1	1151	188	8.37	19730	-	0.959515	Cluster4
TraesCS6A02G319600.1	6A	TraesCS6A02G319600	555088987	555089748	+	AP2/ERF-ERF	2	744	247	8.6	25713.5	-	0.836152	Cluster4
TraesCS6A02G330500.1	6A	TraesCS6A02G330500	563026084	563027524	+	AP2/ERF-ERF	1	1441	235	4.79	24764.3	-	0.7786	Cluster6
TraesCS6A02G340100.1	6A	TraesCS6A02G340100	573413614	573414303	-	AP2/ERF-ERF	1	690	229	5.01	24667.2	-	0.942008	Cluster4
TraesCS6A02G343300.1	6A	TraesCS6A02G343300	577721892	577725302	-	AP2/ERF-ERF	3	1666	398	4.85	43154.4	-	0.362982	Cluster1
TraesCS6A02G345700.1	6A	TraesCS6A02G345700	579130691	579131083	+	AP2/ERF-ERF	1	393	130	9.21	14709.7	-	-	#N/A
TraesCS6A02G360300.1	6A	TraesCS6A02G360300	591380287	591381378	-	AP2/ERF-ERF	2	981	166	9.23	17805.1	-	0.970535	Cluster6
TraesCS6A02G381000.1	6A	TraesCS6A02G381000	601005067	601006146	-	AP2/ERF-ERF	1	1080	246	5.04	26395.3	PO:0020048:microspore	0.987628	Cluster4
TraesCS6A02G381200.1	6A	TraesCS6A02G381200	601133506	601134243	-	AP2/ERF-ERF	1	738	245	5.66	26075.1	PO:0020048:microspore	0.865306	Cluster6
TraesCS6A02G390700.1	6A	TraesCS6A02G390700	605390919	605391812	-	AP2/ERF-ERF	1	894	297	8.64	31557.2	-	0.987858	Cluster4
TraesCS6B02G069200.1	6B	TraesCS6B02G069200	46742268	46742651	+	AP2/ERF-ERF	1	384	127	6.3	13566	-	0.990878	Cluster4
TraesCS6B02G125900.1	6B	TraesCS6B02G125900	121431372	121433796	-	AP2/ERF-ERF	3	1505	385	5.15	42425.5	-	0.888786	Cluster2
TraesCS6B02G126600.1	6B	TraesCS6B02G126600	121958775	121961238	-	AP2/ERF-ERF	3	1480	366	5	40088.7	-	0.915031	Cluster2
TraesCS6B02G126700.1	6B	TraesCS6B02G126700	122186080	122187688	-	AP2/ERF-ERF	2	711	236	9.6	26158.7	-	0.965267	Cluster2
TraesCS6B02G158800.1	6B	TraesCS6B02G158800	161462369	161463508	-	AP2/ERF-ERF	1	1140	314	9.22	33796.3	-	0.973712	Cluster1
TraesCS6B02G158900.1	6B	TraesCS6B02G158900	161494025	161495655	+	AP2/ERF-ERF	1	1631	478	9.9	50963.8	-	0.934865	Cluster2
TraesCS6B02G159000.1	6B	TraesCS6B02G159000	161587349	161588974	+	AP2/ERF-ERF	1	1626	415	6.25	44170.9	-	0.844069	Cluster1
TraesCS6B02G159600.1	6B	TraesCS6B02G159600	163229055	163230182	-	AP2/ERF-ERF	1	1128	203	6.6	20684	-	0.645099	Cluster4
TraesCS6B02G199800.1	6B	TraesCS6B02G199800	239728953	239730211	+	AP2/ERF-ERF	1	1259	204	6.89	21110.8	-	0.598725	Cluster5
TraesCS6B02G210300.1	6B	TraesCS6B02G210300	277623567	277624948	-	AP2/ERF-ERF	3	1098	207	9.62	22213	PO:0004707:fruit dehiscence zone, PO:0004711:axillary inflorescence bud	0.833585	Cluster2
TraesCS6B02G218000.1	6B	TraesCS6B02G218000	300241264	300242573	-	AP2/ERF-ERF	1	1310	244	5.27	26041	PO:0020048:microspore	0.960015	Cluster4
TraesCS6B02G229700.1	6B	TraesCS6B02G229700	368471249	368482970	-	AP2/ERF-ERF	7	862	218	8.86	24802	-	0.312198	Cluster3
TraesCS6B02G237700.1	6B	TraesCS6B02G237700	413284077	413284973	+	AP2/ERF-ERF	1	897	298	6.45	32255.7	-	0.905522	Cluster1
TraesCS6B02G263800.1	6B	TraesCS6B02G263800	474748332	474750083	-	AP2/ERF-ERF	1	1752	454	6.77	49066.9	-	0.85035	Cluster6
TraesCS6B02G268100.1	6B	TraesCS6B02G268100	481843555	481844672	-	AP2/ERF-ERF	1	1118	217	5.15	23183.8	PO:0009062:gynoecium	0.682122	Cluster7
TraesCS6B02G268700.1	6B	TraesCS6B02G268700	483330977	483333909	+	AP2/ERF-ERF	2	2489	269	5.75	28653.7	-	0.893275	Cluster4
TraesCS6B02G274200.1	6B	TraesCS6B02G274200	495542825	495543990	-	AP2/ERF-ERF	1	1166	229	5.86	23776.2	-	0.73492	Cluster2
TraesCS6B02G274300.1	6B	TraesCS6B02G274300	495743440	495744471	-	AP2/ERF-ERF	1	1032	230	5.44	24550.3	-	0.943444	Cluster4
TraesCS6B02G274500.1	6B	TraesCS6B02G274500	495805960	495807007	-	AP2/ERF-ERF	1	1048	248	5.5	26302.8	-	0.88097	Cluster6
TraesCS6B02G280800.1	6B	TraesCS6B02G280800	506835026	506836457	-	AP2/ERF-ERF	1	1432	318	5.35	34097.1	-	0.834989	Cluster5
TraesCS6B02G281000.1	6B	TraesCS6B02G281000	507404337	507405718	+	AP2/ERF-ERF	1	1382	271	5.96	28665.4	-	0.836346	Cluster4
TraesCS6B02G331000.1	6B	TraesCS6B02G331000	581867024	581868894	-	AP2/ERF-ERF	1	1871	333	6.23	35715.9	-	0.481518	Cluster3
TraesCS6B02G350000.1	6B	TraesCS6B02G350000	615166995	615167808	+	AP2/ERF-ERF	1	814	188	9.27	19694.2	-	0.992814	Cluster4
TraesCS6B02G350100.1	6B	TraesCS6B02G350100	615230245	615231076	+	AP2/ERF-ERF	1	832	187	9.75	19464.8	-	0.966396	Cluster4
TraesCS6B02G350400.1	6B	TraesCS6B02G350400	615605331	615606561	+	AP2/ERF-ERF	1	1231	253	9.21	26698.8	-	0.823238	Cluster4
TraesCS6B02G361400.1	6B	TraesCS6B02G361400	632954631	632955979	+	AP2/ERF-ERF	1	1349	237	4.88	24967.6	-	0.746805	Cluster6
TraesCS6B02G371300.1	6B	TraesCS6B02G371300	645358863	645360039	-	AP2/ERF-ERF	1	1177	233	5.11	24996.6	-	0.957776	Cluster4
TraesCS6B02G375400.1	6B	TraesCS6B02G375400	649831108	649834547	-	AP2/ERF-ERF	3	1691	398	4.74	42985.1	-	0.426693	Cluster1
TraesCS6B02G393200.1	6B	TraesCS6B02G393200	668029157	668030185	-	AP2/ERF-ERF	2	924	170	8.8	18103.4	-	0.914171	Cluster6
TraesCS6B02G420100.1	6B	TraesCS6B02G420100	691748787	691749524	-	AP2/ERF-ERF	1	738	245	5.4	26104	PO:0020048:microspore	0.973755	Cluster4
TraesCS6B02G431100.1	6B	TraesCS6B02G431100	699017845	699018714	-	AP2/ERF-ERF	1	870	289	8.48	30645.2	-	0.944897	Cluster2
TraesCS6D02G084200.1	6D	TraesCS6D02G084200	49181616	49184120	+	AP2/ERF-ERF	3	1545	379	5.12	41659.4	-	0.893812	Cluster2
TraesCS6D02G084900.1	6D	TraesCS6D02G084900	50178640	50181160	+	AP2/ERF-ERF	3	1606	389	4.71	42468.5	-	0.933556	Cluster2
TraesCS6D02G085000.1	6D	TraesCS6D02G085000	50604107	50606425	+	AP2/ERF-ERF	3	1413	324	4.83	35855.8	-	0.939164	Cluster2
TraesCS6D02G120100.1	6D	TraesCS6D02G120100	85091201	85092697	-	AP2/ERF-ERF	1	1497	498	9.46	52725.2	-	0.969843	Cluster2
TraesCS6D02G120200.1	6D	TraesCS6D02G120200	85099603	85100538	+	AP2/ERF-ERF	1	936	311	8.57	33187.5	-	0.951299	Cluster6
TraesCS6D02G121100.1	6D	TraesCS6D02G121100	86141938	86143086	-	AP2/ERF-ERF	1	1149	204	6.6	20766.1	-	0.65457	Cluster4
TraesCS6D02G161300.1	6D	TraesCS6D02G161300	139916019	139917247	+	AP2/ERF-ERF	1	1229	207	7.63	21498.2	-	0.585935	Cluster5
TraesCS6D02G173500.1	6D	TraesCS6D02G173500	162125876	162126607	+	AP2/ERF-ERF	1	732	243	5.27	25922	PO:0020048:microspore	0.965548	Cluster4
TraesCS6D02G179200.1	6D	TraesCS6D02G179200	192108295	192118265	-	AP2/ERF-ERF	7	862	218	8.86	24788	-	0.309287	Cluster3
TraesCS6D02G192200.1	6D	TraesCS6D02G192200	265880824	265881720	+	AP2/ERF-ERF	1	897	298	6.59	32296.8	-	0.918376	Cluster1
TraesCS6D02G217800.1	6D	TraesCS6D02G217800	307516346	307518312	-	AP2/ERF-ERF	1	1967	457	7.79	49239	-	0.882791	Cluster6
TraesCS6D02G225500.1	6D	TraesCS6D02G225500	317105080	317106446	-	AP2/ERF-ERF	1	1367	273	5.97	28705.4	-	0.798306	Cluster4
TraesCS6D02G225700.1	6D	TraesCS6D02G225700	317413925	317417738	+	AP2/ERF-ERF	4	1289	317	5.33	33949.9	-	0.883387	Cluster5
TraesCS6D02G232700.1	6D	TraesCS6D02G232700	326540070	326541094	+	AP2/ERF-ERF	1	1025	252	5.42	26687.3	-	0.883187	Cluster2
TraesCS6D02G232800.1	6D	TraesCS6D02G232800	326572537	326573559	+	AP2/ERF-ERF	1	1023	227	5.24	24244	-	0.951276	Cluster6
TraesCS6D02G237800.1	6D	TraesCS6D02G237800	337077828	337079472	-	AP2/ERF-ERF	2	1204	260	5.35	27119	-	0.922852	Cluster4
TraesCS6D02G238200.1	6D	TraesCS6D02G238200	338513942	338515186	+	AP2/ERF-ERF	1	1245	217	5.29	23195.9	PO:0009062:gynoecium	0.677339	Cluster7
TraesCS6D02G281200.1	6D	TraesCS6D02G281200	388950606	388952626	-	AP2/ERF-ERF	2	1976	333	7.02	35682.9	-	0.4437	Cluster3
TraesCS6D02G298700.1	6D	TraesCS6D02G298700	409516233	409517479	+	AP2/ERF-ERF	1	1247	187	9.48	19774.3	-	0.955405	Cluster4
TraesCS6D02G298800.1	6D	TraesCS6D02G298800	409518933	409519860	+	AP2/ERF-ERF	1	928	220	8.69	23364.1	-	0.989623	Cluster4
TraesCS6D02G299000.1	6D	TraesCS6D02G299000	409584102	409585067	+	AP2/ERF-ERF	1	966	188	9.22	19632.1	-	0.98178	Cluster4
TraesCS6D02G299100.1	6D	TraesCS6D02G299100	409655015	409656300	+	AP2/ERF-ERF	1	1286	297	9.56	31593.3	-	0.861424	Cluster4
TraesCS6D02G309600.1	6D	TraesCS6D02G309600	420003948	420004661	+	AP2/ERF-ERF	1	714	237	4.99	25107.7	-	0.785791	Cluster6
TraesCS6D02G320700.1	6D	TraesCS6D02G320700	428649065	428650246	-	AP2/ERF-ERF	1	1182	233	5	24940.4	-	0.95037	Cluster4
TraesCS6D02G324200.1	6D	TraesCS6D02G324200	430844082	430847579	-	AP2/ERF-ERF	3	1751	398	4.88	43193.5	-	0.326627	Cluster1
TraesCS6D02G343800.1	6D	TraesCS6D02G343800	443740714	443741352	-	AP2/ERF-ERF	2	513	170	8.8	18089.4	-	0.962617	Cluster6
TraesCS6D02G365800.1	6D	TraesCS6D02G365800	454686316	454687053	+	AP2/ERF-ERF	1	738	245	5.27	26289.2	PO:0020048:microspore	0.97078	Cluster4
TraesCS6D02G366100.1	6D	TraesCS6D02G366100	454799522	454800695	-	AP2/ERF-ERF	1	1174	244	5.58	25990.8	PO:0020048:microspore	0.967294	Cluster4
TraesCS6D02G377000.1	6D	TraesCS6D02G377000	459734435	459735711	-	AP2/ERF-ERF	1	1277	330	8.89	34884.9	-	0.936557	Cluster2
TraesCS7A02G057700.1	7A	TraesCS7A02G057700	27901271	27902307	+	AP2/ERF-ERF	1	1037	225	5.49	23661.2	-	0.865068	Cluster4
TraesCS7A02G057800.1	7A	TraesCS7A02G057800	27904396	27905476	-	AP2/ERF-ERF	1	1081	210	8.37	22308	-	0.904223	Cluster6
TraesCS7A02G120100.1	7A	TraesCS7A02G120100	77419016	77420001	+	AP2/ERF-ERF	1	986	318	4.54	34583.4	-	0.902513	Cluster1
TraesCS7A02G128800.1	7A	TraesCS7A02G128800	82942180	82943327	+	AP2/ERF-ERF	1	1148	179	10.5	18978.4	-	0.448523	Cluster5
TraesCS7A02G145800.1	7A	TraesCS7A02G145800	97266780	97267826	+	AP2/ERF-ERF	2	949	166	5.91	18067.1	-	0.965409	Cluster6
TraesCS7A02G158000.1	7A	TraesCS7A02G158000	112263526	112266127	+	AP2/ERF-ERF	3	1636	353	4.7	38727	-	0.369917	Cluster2
TraesCS7A02G169300.1	7A	TraesCS7A02G169300	126034199	126035419	-	AP2/ERF-ERF	1	1221	245	4.41	25286.1	-	0.852383	Cluster5
TraesCS7A02G180900.1	7A	TraesCS7A02G180900	135688695	135690799	-	AP2/ERF-ERF	1	2105	362	6.5	38471.5	-	0.593339	Cluster5
TraesCS7A02G250800.1	7A	TraesCS7A02G250800	233303977	233304600	-	AP2/ERF-ERF	1	624	207	9.16	22908.9	-	0.938213	Cluster2
TraesCS7A02G250900.1	7A	TraesCS7A02G250900	233307278	233308229	-	AP2/ERF-ERF	1	952	208	9.8	23025.3	-	0.885319	Cluster2
TraesCS7A02G264100.1	7A	TraesCS7A02G264100	262473336	262475332	+	AP2/ERF-ERF	2	1354	227	10.79	23619.3	-	0.751227	Cluster6
TraesCS7A02G355500.1	7A	TraesCS7A02G355500	520563393	520564472	+	AP2/ERF-ERF	1	1080	249	4.85	26192.2	-	0.894803	Cluster2
TraesCS7A02G376300.1	7A	TraesCS7A02G376300	549356849	549358391	-	AP2/ERF-ERF	2	1336	227	9.18	24138.3	PO:0004707:fruit dehiscence zone, PO:0004711:axillary inflorescence bud	0.773346	Cluster2
TraesCS7A02G377400.1	7A	TraesCS7A02G377400	551541411	551543889	-	AP2/ERF-ERF	3	1447	340	5.06	37762.4	-	0.950382	Cluster2
TraesCS7A02G436400.1	7A	TraesCS7A02G436400	630869200	630871101	+	AP2/ERF-ERF	2	1251	195	8.32	20635.9	-	0.668192	Cluster2
TraesCS7B02G018400.1	7B	TraesCS7B02G018400	15505816	15506906	+	AP2/ERF-ERF	1	1091	322	4.63	35225.5	-	0.992647	Cluster1
TraesCS7B02G028700.1	7B	TraesCS7B02G028700	27067404	27067958	+	AP2/ERF-ERF	1	555	184	10.67	19321.7	-	0.658457	Cluster5
TraesCS7B02G048100.1	7B	TraesCS7B02G048100	47737227	47737933	+	AP2/ERF-ERF	2	616	162	6.07	17848.8	-	0.939347	Cluster6
TraesCS7B02G062200.1	7B	TraesCS7B02G062200	65660420	65663385	+	AP2/ERF-ERF	3	2007	355	4.65	39157.4	-	0.368309	Cluster2
TraesCS7B02G074500.1	7B	TraesCS7B02G074500	84220426	84221631	+	AP2/ERF-ERF	1	1206	237	4.46	24436.2	-	0.911793	Cluster4
TraesCS7B02G085900.1	7B	TraesCS7B02G085900	99088470	99090547	-	AP2/ERF-ERF	1	2078	368	6.59	39236.3	-	0.604649	Cluster5
TraesCS7B02G140200.1	7B	TraesCS7B02G140200	176736011	176737022	+	AP2/ERF-ERF	1	1012	259	9.88	29092.5	-	0.932547	Cluster2
TraesCS7B02G140300.1	7B	TraesCS7B02G140300	176738907	176739913	+	AP2/ERF-ERF	1	1007	207	8.82	22874.8	-	0.903462	Cluster2
TraesCS7B02G162100.1	7B	TraesCS7B02G162100	222312989	222315114	+	AP2/ERF-ERF	3	1063	224	10.79	23361.2	-	0.87274	Cluster4
TraesCS7B02G178900.1	7B	TraesCS7B02G178900	261997165	261997746	+	AP2/ERF-ERF	1	582	193	5.5	22402.4	-	0.874666	Cluster3
TraesCS7B02G272300.1	7B	TraesCS7B02G272300	499256425	499257174	-	AP2/ERF-ERF	1	750	249	4.8	26119.3	-	0.943304	Cluster6
TraesCS7B02G277800.1	7B	TraesCS7B02G277800	508194379	508195800	-	AP2/ERF-ERF	2	1209	225	9.3	23994.1	PO:0004707:fruit dehiscence zone, PO:0004711:axillary inflorescence bud	0.79488	Cluster2
TraesCS7B02G278700.1	7B	TraesCS7B02G278700	509735490	509737797	-	AP2/ERF-ERF	3	1152	383	4.54	42424.6	-	0.979145	Cluster2
TraesCS7B02G283900.1	7B	TraesCS7B02G283900	517932310	517933149	-	AP2/ERF-ERF	1	840	279	4.61	31185	-	0.961692	Cluster1
TraesCS7B02G335700.1	7B	TraesCS7B02G335700	590842119	590842703	-	AP2/ERF-ERF	1	585	194	9.02	20605.8	-	0.723014	Cluster2
TraesCS7D02G031300.1	7D	TraesCS7D02G031300	16635274	16636077	-	AP2/ERF-ERF	1	804	267	5.68	29582.7	-	-	#N/A
TraesCS7D02G052400.1	7D	TraesCS7D02G052400	27453025	27454128	+	AP2/ERF-ERF	1	1104	219	5.06	23090.5	-	0.840913	Cluster6
TraesCS7D02G052500.1	7D	TraesCS7D02G052500	27467566	27468249	-	AP2/ERF-ERF	1	684	227	8.94	23863.1	-	0.952283	Cluster6
TraesCS7D02G052600.1	7D	TraesCS7D02G052600	27470774	27471448	-	AP2/ERF-ERF	1	675	224	8.22	23857.8	-	0.934264	Cluster6
TraesCS7D02G118000.1	7D	TraesCS7D02G118000	72965952	72967198	-	AP2/ERF-ERF	1	1247	324	4.61	35351.5	-	0.99372	Cluster1
TraesCS7D02G127600.1	7D	TraesCS7D02G127600	79963951	79965108	+	AP2/ERF-ERF	1	1158	179	10.5	19017.4	-	0.454204	Cluster5
TraesCS7D02G147100.1	7D	TraesCS7D02G147100	93948619	93949410	-	AP2/ERF-ERF	2	702	164	6.29	17942	-	0.929313	Cluster2
TraesCS7D02G147200.1	7D	TraesCS7D02G147200	94005429	94006409	+	AP2/ERF-ERF	2	890	163	5.91	17813.8	-	0.912087	Cluster6
TraesCS7D02G158500.1	7D	TraesCS7D02G158500	106915520	106917944	+	AP2/ERF-ERF	3	1455	355	4.68	39042.3	-	0.308745	Cluster2
TraesCS7D02G170600.1	7D	TraesCS7D02G170600	123146095	123147265	+	AP2/ERF-ERF	1	1171	235	4.51	24263.1	-	0.949178	Cluster4
TraesCS7D02G181900.1	7D	TraesCS7D02G181900	135438407	135439059	-	AP2/ERF-ERF	1	653	197	7.93	23065.5	-	0.963297	Cluster6
TraesCS7D02G182700.1	7D	TraesCS7D02G182700	136203799	136205955	-	AP2/ERF-ERF	1	2157	366	6.5	38989	-	0.59753	Cluster5
TraesCS7D02G250700.1	7D	TraesCS7D02G250700	223111403	223112428	-	AP2/ERF-ERF	1	1026	207	8.66	22797.8	-	0.891995	Cluster2
TraesCS7D02G250800.1	7D	TraesCS7D02G250800	223114252	223115070	-	AP2/ERF-ERF	1	819	208	9.42	23095.4	-	0.947677	Cluster2
TraesCS7D02G265000.1	7D	TraesCS7D02G265000	246074131	246076185	+	AP2/ERF-ERF	2	1242	224	10.61	23211.9	-	0.783025	Cluster5
TraesCS7D02G330500.1	7D	TraesCS7D02G330500	422152994	422153875	+	AP2/ERF-ERF	1	882	199	5.27	23336.3	-	0.866115	Cluster1
TraesCS7D02G367500.1	7D	TraesCS7D02G367500	475375095	475375844	-	AP2/ERF-ERF	1	750	249	4.84	26099.2	-	0.916995	Cluster6
TraesCS7D02G372700.1	7D	TraesCS7D02G372700	482133052	482134519	-	AP2/ERF-ERF	2	1259	227	9.3	24124.2	PO:0004707:fruit dehiscence zone, PO:0004711:axillary inflorescence bud	0.752688	Cluster2
TraesCS7D02G373700.1	7D	TraesCS7D02G373700	484070434	484072754	-	AP2/ERF-ERF	2	1385	359	4.78	39833.6	-	0.981658	Cluster2
TraesCS7D02G378200.1	7D	TraesCS7D02G378200	489300878	489301717	-	AP2/ERF-ERF	1	840	279	4.77	30970.7	-	1	Cluster1
TraesCS7D02G416300.1	7D	TraesCS7D02G416300	535509791	535512076	+	AP2/ERF-ERF	3	1244	331	5.19	36981.6	-	0.980956	Cluster2
TraesCS7D02G426700.1	7D	TraesCS7D02G426700	547680813	547681412	-	AP2/ERF-ERF	1	600	199	8.32	21059.3	-	0.633082	Cluster2
TraesCS7D02G469200.1	7D	TraesCS7D02G469200	582458439	582458942	+	AP2/ERF-ERF	1	504	167	11.69	18336.2	-	0.87135	Cluster5
TraesCSU02G183700.1	Un	TraesCSU02G183700	277361437	277362587	+	AP2/ERF-ERF	2	1072	284	4.93	31397.2	-	0.970836	Cluster2
TraesCS1A02G372100.1	1A	TraesCS1A02G372100	548733303	548734833	+	AP2/ERF-RAV	1	1531	442	9.62	47632.4	-	0.878847	Cluster5
TraesCS1A02G372200.1	1A	TraesCS1A02G372200	548772420	548773661	+	AP2/ERF-RAV	1	1242	413	9.69	44243	-	0.854731	Cluster4
TraesCS1A02G372300.1	1A	TraesCS1A02G372300	548789228	548790730	+	AP2/ERF-RAV	1	1503	392	9.57	42007.3	-	0.753958	Cluster7
TraesCS1B02G392000.1	1B	TraesCS1B02G392000	624970745	624972482	+	AP2/ERF-RAV	1	1738	411	9.4	44088.7	-	0.883552	Cluster2
TraesCS1B02G392200.1	1B	TraesCS1B02G392200	625082503	625084035	+	AP2/ERF-RAV	1	1533	416	9.57	44677.4	-	0.693804	Cluster3
TraesCS1B02G392300.1	1B	TraesCS1B02G392300	625145121	625146698	+	AP2/ERF-RAV	1	1578	391	9.68	42106.4	-	0.63846	Cluster5
TraesCS1D02G378400.1	1D	TraesCS1D02G378400	454456730	454458522	-	AP2/ERF-RAV	1	1793	412	9.73	44092.8	-	0.662911	Cluster3
TraesCS1D02G378500.1	1D	TraesCS1D02G378500	454492368	454493898	-	AP2/ERF-RAV	1	1531	419	9.7	45164.9	-	0.891448	Cluster5
TraesCS1D02G378800.1	1D	TraesCS1D02G378800	454769010	454770618	+	AP2/ERF-RAV	1	1609	415	9.63	44541	-	0.660765	Cluster3
TraesCS1D02G378900.1	1D	TraesCS1D02G378900	454812639	454814248	+	AP2/ERF-RAV	1	1610	392	9.5	42070.4	-	0.697495	Cluster5
TraesCS3A02G053900.1	3A	TraesCS3A02G053900	30996679	30998012	+	AP2/ERF-RAV	2	1194	320	5.6	34812.4	-	0.879903	Cluster7
TraesCS3A02G054000.1	3A	TraesCS3A02G054000	31558996	31560648	+	AP2/ERF-RAV	1	1653	356	9.4	38541.3	-	0.904134	Cluster7
TraesCS3A02G259900.1	3A	TraesCS3A02G259900	482183185	482184828	-	AP2/ERF-RAV	1	1644	375	9.4	39403.5	-	0.607781	Cluster4
TraesCS3B02G064900.1	3B	TraesCS3B02G064900	37970741	37971811	+	AP2/ERF-RAV	1	1071	356	9.4	38414.3	-	0.897392	Cluster7
TraesCS3B02G065100.1	3B	TraesCS3B02G065100	38793852	38795321	+	AP2/ERF-RAV	1	1470	350	9.71	38321.4	-	0.833079	Cluster1
TraesCS3B02G293000.1	3B	TraesCS3B02G293000	471799652	471801391	-	AP2/ERF-RAV	1	1740	383	9.23	40273.3	-	0.602518	Cluster4
TraesCS3D02G052300.1	3D	TraesCS3D02G052300	21792841	21795028	+	AP2/ERF-RAV	1	2188	356	9.45	38412.2	-	0.85169	Cluster7
TraesCS3D02G052400.1	3D	TraesCS3D02G052400	21888438	21889499	+	AP2/ERF-RAV	1	1062	353	9.71	38517.6	-	0.841608	Cluster7
TraesCS3D02G260100.1	3D	TraesCS3D02G260100	362069410	362070552	-	AP2/ERF-RAV	2	1125	374	9.39	39435.6	-	0.668291	Cluster4
TraesCS4B02G325600.1	4B	TraesCS4B02G325600	616735574	616736753	-	AP2/ERF-RAV	1	1180	308	5.94	33342.8	-	0.79864	Cluster1
TraesCS4B02G325700.1	4B	TraesCS4B02G325700	616967466	616968769	+	AP2/ERF-RAV	1	1304	336	9.55	36737.5	-	0.793567	Cluster2
TraesCS4D02G322500.1	4D	TraesCS4D02G322500	484494175	484495092	-	AP2/ERF-RAV	1	918	305	6.73	33098.6	-	0.939736	Cluster6
TraesCS4D02G322600.1	4D	TraesCS4D02G322600	484620694	484621953	+	AP2/ERF-RAV	1	1260	362	9.71	39661.8	-	0.867717	Cluster6
TraesCS5A02G497900.1	5A	TraesCS5A02G497900	665443564	665444952	+	AP2/ERF-RAV	1	1389	368	9.53	40308.6	-	0.819853	Cluster2
TraesCSU02G179500.1	Un	TraesCSU02G179500	270381853	270382815	-	AP2/ERF-RAV	1	963	320	5.6	34816.4	-	0.964879	Cluster4
TraesCSU02G227200.1	Un	TraesCSU02G227200	336369406	336373553	-	AP2/ERF-RAV	2	1482	351	9.67	38194.2	-	0.912085	Cluster7
TraesCS1A02G034200.1	1A	TraesCS1A02G034200	16924974	16925261	-	B3	1	288	95	8.6	10737.5	-	-	#N/A
TraesCS1A02G039100.1	1A	TraesCS1A02G039100	21281532	21285458	-	B3	8	2495	663	8.39	74275.5	-	0.377899	Cluster1
TraesCS1A02G075800.1	1A	TraesCS1A02G075800	58840182	58845652	-	B3	11	2071	572	6.35	63614.8	-	0.643829	Cluster3
TraesCS1A02G140000.1	1A	TraesCS1A02G140000	238075954	238076241	+	B3	1	288	95	7.8	10773.5	-	-	#N/A
TraesCS1A02G192100.1	1A	TraesCS1A02G192100	347593383	347593670	+	B3	1	288	95	7.79	10719.5	-	0.994595	Cluster2
TraesCS1A02G200500.1	1A	TraesCS1A02G200500	361173339	361174748	-	B3	3	1371	278	9.53	30218.3	-	0.958734	Cluster4
TraesCS1A02G219300.1	1A	TraesCS1A02G219300	387996190	387996477	+	B3	1	288	95	8.64	10771.5	-	-	#N/A
TraesCS1A02G252100.1	1A	TraesCS1A02G252100	443852990	443855265	+	B3	5	1022	214	4.17	23810.5	-	0.989674	Cluster2
TraesCS1A02G269900.1	1A	TraesCS1A02G269900	463970300	463970587	+	B3	1	288	95	7.77	10826.7	-	-	#N/A
TraesCS1A02G298500.1	1A	TraesCS1A02G298500	493294905	493295192	-	B3	1	288	95	8.6	10763.6	-	0.990046	Cluster5
TraesCS1A02G302700.1	1A	TraesCS1A02G302700	496311912	496315200	-	B3	7	1286	298	9.24	33628.6	-	0.748971	Cluster1
TraesCS1A02G332100.1	1A	TraesCS1A02G332100	520769045	520769515	+	B3	1	471	156	5.95	17571.2	-	1	Cluster4
TraesCS1A02G399700.1	1A	TraesCS1A02G399700	564092095	564096290	-	B3	9	2235	655	9.15	72896.5	-	0.882317	Cluster6
TraesCS1A02G423300.1	1A	TraesCS1A02G423300	578758767	578759054	-	B3	1	288	95	8.95	10840.6	-	-	#N/A
TraesCS1B02G051600.1	1B	TraesCS1B02G051600	31856704	31860904	-	B3	9	2675	635	7.33	71027.7	-	0.63561	Cluster1
TraesCS1B02G108300.1	1B	TraesCS1B02G108300	120416952	120418958	+	B3	3	1021	242	4.27	26984.9	-	-	#N/A
TraesCS1B02G127100.1	1B	TraesCS1B02G127100	155745717	155746190	+	B3	1	474	157	5.49	17745.2	-	0.982436	Cluster6
TraesCS1B02G144100.1	1B	TraesCS1B02G144100	196059537	196059824	+	B3	1	288	95	7.82	10886.7	-	-	#N/A
TraesCS1B02G173800.1	1B	TraesCS1B02G173800	311134657	311134944	-	B3	1	288	95	7.78	10689.5	-	1	Cluster1
TraesCS1B02G211500.1	1B	TraesCS1B02G211500	385029458	385029745	+	B3	1	288	95	6.82	10833.6	-	1	Cluster2
TraesCS1B02G215000.1	1B	TraesCS1B02G215000	390380340	390381206	-	B3	3	828	275	9.75	29904.1	-	0.924961	Cluster4
TraesCS1B02G308800.1	1B	TraesCS1B02G308800	531206366	531209686	+	B3	7	2301	611	6.14	68632.8	-	0.629094	Cluster1
TraesCS1B02G312900.1	1B	TraesCS1B02G312900	536664808	536667856	-	B3	7	1205	283	8.39	31936.5	-	0.716597	Cluster1
TraesCS1B02G338700.1	1B	TraesCS1B02G338700	566610765	566611052	+	B3	1	288	95	8.95	10760.6	-	0.946256	Cluster3
TraesCS1B02G372200.1	1B	TraesCS1B02G372200	602897618	602897905	+	B3	1	288	95	8.95	10941.9	-	-	#N/A
TraesCS1B02G385400.1	1B	TraesCS1B02G385400	619123243	619123530	-	B3	1	288	95	7.74	10771.6	-	-	#N/A
TraesCS1B02G390400.1	1B	TraesCS1B02G390400	623937451	623937987	-	B3	1	537	178	9.39	20570.9	-	-	#N/A
TraesCS1B02G395700.1	1B	TraesCS1B02G395700	627376873	627378894	-	B3	4	803	237	4.29	26544.8	-	-	#N/A
TraesCS1B02G427800.1	1B	TraesCS1B02G427800	653081607	653085318	-	B3	8	1968	655	9.17	72802.3	-	0.914593	Cluster1
TraesCS1B02G466600.1	1B	TraesCS1B02G466600	676879333	676879620	-	B3	1	288	95	6.81	10863.7	-	-	#N/A
TraesCS1D02G040700.1	1D	TraesCS1D02G040700	19875647	19879912	-	B3	9	2733	640	8.25	71375.1	-	0.521066	Cluster2
TraesCS1D02G078100.1	1D	TraesCS1D02G078100	60169290	60172498	-	B3	4	1379	384	5.23	43134.8	-	0.568338	Cluster3
TraesCS1D02G095700.1	1D	TraesCS1D02G095700	80888076	80888504	-	B3	2	288	95	7.78	10783.6	-	-	#N/A
TraesCS1D02G128600.1	1D	TraesCS1D02G128600	141897573	141897860	+	B3	1	288	95	6.81	10802.4	-	-	#N/A
TraesCS1D02G151400.1	1D	TraesCS1D02G151400	209755483	209757349	+	B3	2	862	184	5.05	20651.5	-	0.923577	Cluster2
TraesCS1D02G203900.1	1D	TraesCS1D02G203900	288892212	288893087	-	B3	1	876	291	9.75	31497	-	0.955837	Cluster4
TraesCS1D02G292200.1	1D	TraesCS1D02G292200	391313874	391317001	-	B3	7	2065	417	5.53	46343.7	-	0.933133	Cluster1
TraesCS1D02G302100.1	1D	TraesCS1D02G302100	399947455	399950546	-	B3	7	1274	283	8.4	31953.6	-	0.537408	Cluster1
TraesCS1D02G330900.1	1D	TraesCS1D02G330900	421085483	421085956	-	B3	1	474	157	5.31	17726.2	-	0.97001	Cluster1
TraesCS1D02G407400.1	1D	TraesCS1D02G407400	470420002	470423172	-	B3	8	1968	655	9.16	73088.5	-	1	Cluster1
TraesCS2A02G009100.1	2A	TraesCS2A02G009100	3759130	3762320	+	B3	8	1775	463	8.76	51827.1	-	0.955801	Cluster1
TraesCS2A02G077500.1	2A	TraesCS2A02G077500	35469349	35470174	+	B3	2	730	155	9.26	17125.4	-	0.919694	Cluster2
TraesCS2A02G105600.1	2A	TraesCS2A02G105600	58011955	58019419	+	B3	12	3691	949	6.34	104473	-	0.384805	Cluster3
TraesCS2A02G144100.1	2A	TraesCS2A02G144100	88983470	88988017	-	B3	10	2132	544	6.56	60609.5	-	0.654014	Cluster1
TraesCS2A02G153200.1	2A	TraesCS2A02G153200	101372085	101375726	+	B3	6	975	208	5.86	23991	-	0.734061	Cluster1
TraesCS2A02G159800.1	2A	TraesCS2A02G159800	108011343	108013593	-	B3	6	897	220	9.62	25569.3	-	0.795236	Cluster1
TraesCS2A02G195700.1	2A	TraesCS2A02G195700	165346289	165346576	-	B3	1	288	95	7.84	10830.6	-	1	Cluster1
TraesCS2A02G199200.1	2A	TraesCS2A02G199200	171850911	171851198	+	B3	1	288	95	8.98	10698.6	-	-	#N/A
TraesCS2A02G204300.1	2A	TraesCS2A02G204300	180977361	180987356	-	B3	12	3297	964	8.45	106667	-	0.371454	Cluster1
TraesCS2A02G207100.1	2A	TraesCS2A02G207100	186589321	186589608	+	B3	1	288	95	8.76	10863.8	-	-	#N/A
TraesCS2A02G283200.1	2A	TraesCS2A02G283200	474746423	474747723	-	B3	3	573	190	8.91	20626.6	-	0.806255	Cluster1
TraesCS2A02G292500.1	2A	TraesCS2A02G292500	504066941	504067228	+	B3	1	288	95	8.95	10765.6	-	-	#N/A
TraesCS2A02G394700.1	2A	TraesCS2A02G394700	645311137	645312351	+	B3	1	1215	404	6.15	43299.2	-	0.896167	Cluster4
TraesCS2A02G402100.1	2A	TraesCS2A02G402100	655908006	655908866	-	B3	2	769	209	4.21	23511.2	-	0.965268	Cluster2
TraesCS2A02G460700.1	2A	TraesCS2A02G460700	706995188	706996214	+	B3	3	801	266	8.28	29978.5	-	0.917811	Cluster4
TraesCS2A02G465700.1	2A	TraesCS2A02G465700	710363222	710365038	-	B3	4	1433	386	6.81	41970	-	0.869021	Cluster2
TraesCS2A02G474400.1	2A	TraesCS2A02G474400	715421725	715427741	-	B3	10	2457	707	8	79514.8	-	0.989056	Cluster1
TraesCS2A02G554300.1	2A	TraesCS2A02G554300	759461630	759465625	+	B3	9	1866	470	9	51762.1	-	0.870899	Cluster2
TraesCS2B02G083200.1	2B	TraesCS2B02G083200	46494446	46494733	-	B3	1	288	95	6.82	10824.6	-	-	#N/A
TraesCS2B02G122500.1	2B	TraesCS2B02G122500	89702026	89709697	+	B3	12	3612	950	6.31	104502	-	0.358787	Cluster3
TraesCS2B02G149800.1	2B	TraesCS2B02G149800	116319256	116319543	+	B3	1	288	95	6.82	10854.7	-	-	#N/A
TraesCS2B02G168900.1	2B	TraesCS2B02G168900	141836385	141841635	-	B3	10	2155	543	5.99	60800.3	-	0.596907	Cluster1
TraesCS2B02G178300.1	2B	TraesCS2B02G178300	153580219	153584049	+	B3	6	1179	199	6.26	23200.3	-	0.621507	Cluster1
TraesCS2B02G185400.1	2B	TraesCS2B02G185400	160410294	160411599	-	B3	5	651	216	9.42	25204.7	-	0.98157	Cluster1
TraesCS2B02G185500.1	2B	TraesCS2B02G185500	160666893	160669455	-	B3	7	1110	216	9.56	25143.9	-	0.893263	Cluster1
TraesCS2B02G202100.1	2B	TraesCS2B02G202100	181980712	181980999	-	B3	1	288	95	9.1	10772.6	-	-	#N/A
TraesCS2B02G231800.1	2B	TraesCS2B02G231800	228980165	228990370	-	B3	13	3253	960	8.37	106241	-	0.274812	Cluster1
TraesCS2B02G319900.1	2B	TraesCS2B02G319900	456033195	456033668	+	B3	1	474	157	5.19	17705.3	-	-	#N/A
TraesCS2B02G321900.1	2B	TraesCS2B02G321900	459479738	459480208	-	B3	1	471	156	5.31	17993.4	-	0.908898	Cluster2
TraesCS2B02G341900.1	2B	TraesCS2B02G341900	488004400	488004687	-	B3	1	288	95	7.74	10620.3	-	0.980987	Cluster1
TraesCS2B02G348300.1	2B	TraesCS2B02G348300	495054721	495055008	+	B3	1	288	95	6.81	10849.6	-	-	#N/A
TraesCS2B02G412700.1	2B	TraesCS2B02G412700	588067011	588072603	+	B3	2	1967	409	6.03	43700.7	-	0.84276	Cluster4
TraesCS2B02G449800.1	2B	TraesCS2B02G449800	643126130	643126417	+	B3	1	288	95	6.81	10773.5	-	-	#N/A
TraesCS2B02G482400.1	2B	TraesCS2B02G482400	680193805	680195396	+	B3	3	1367	267	7.23	29923.3	-	0.851854	Cluster1
TraesCS2B02G487800.1	2B	TraesCS2B02G487800	683758420	683760224	-	B3	4	1431	384	8.58	41901.2	-	0.851827	Cluster2
TraesCS2B02G497900.1	2B	TraesCS2B02G497900	694420113	694426360	-	B3	10	2468	704	7.04	79539	-	0.992809	Cluster1
TraesCS2B02G498000.1	2B	TraesCS2B02G498000	694440854	694445308	-	B3	8	2337	724	6.83	81912.8	-	0.986325	Cluster1
TraesCS2B02G589800.1	2B	TraesCS2B02G589800	776218929	776223021	+	B3	9	1955	450	8.88	50068.3	-	0.871928	Cluster2
TraesCS2D02G053500.1	2D	TraesCS2D02G053500	20917753	20918041	-	B3	2	288	95	8.58	10816.7	-	-	#N/A
TraesCS2D02G105300.1	2D	TraesCS2D02G105300	56639691	56646412	+	B3	13	2736	911	6.51	100569	-	0.47273	Cluster5
TraesCS2D02G147400.1	2D	TraesCS2D02G147400	88300467	88300754	+	B3	1	288	95	7.79	10717.5	-	0.954668	Cluster4
TraesCS2D02G148000.1	2D	TraesCS2D02G148000	89259218	89263647	-	B3	10	2063	534	6.46	59372.8	-	0.858015	Cluster1
TraesCS2D02G158500.1	2D	TraesCS2D02G158500	102269701	102273597	+	B3	6	1063	210	6.47	24409.6	-	0.754427	Cluster1
TraesCS2D02G167000.1	2D	TraesCS2D02G167000	110948426	110950437	-	B3	4	890	258	9.55	29820.2	-	0.886064	Cluster1
TraesCS2D02G211600.1	2D	TraesCS2D02G211600	169034114	169044083	+	B3	12	3373	958	8.37	106097	-	0.240332	Cluster1
TraesCS2D02G281900.1	2D	TraesCS2D02G281900	354813116	354814951	-	B3	4	877	217	8.32	23295.6	-	0.85088	Cluster1
TraesCS2D02G363300.1	2D	TraesCS2D02G363300	469162861	469163148	+	B3	1	288	95	8.93	10714.6	-	-	#N/A
TraesCS2D02G363500.1	2D	TraesCS2D02G363500	469181276	469182006	+	B3	2	588	195	5.39	22083.2	-	-	#N/A
TraesCS2D02G383000.1	2D	TraesCS2D02G383000	487335889	487336164	-	B3	1	276	91	8.6	10344.2	-	-	#N/A
TraesCS2D02G392400.1	2D	TraesCS2D02G392400	500362252	500363844	+	B3	1	1593	409	6.28	43718.8	-	0.900445	Cluster4
TraesCS2D02G460900.1	2D	TraesCS2D02G460900	567477279	567478310	+	B3	3	804	267	8.37	30021.5	-	0.900601	Cluster6
TraesCS2D02G466100.1	2D	TraesCS2D02G466100	571882819	571884655	-	B3	4	1460	340	6.97	37019.5	-	0.83939	Cluster2
TraesCS2D02G474100.1	2D	TraesCS2D02G474100	577341410	577347196	-	B3	10	2466	706	8.66	79556	-	0.997172	Cluster1
TraesCS2D02G535300.1	2D	TraesCS2D02G535300	618295793	618296080	+	B3	1	288	95	7.79	10795.6	-	-	#N/A
TraesCS2D02G555100.1	2D	TraesCS2D02G555100	629242453	629242740	+	B3	1	288	95	9.2	10745.6	-	-	#N/A
TraesCS2D02G560000.1	2D	TraesCS2D02G560000	632978544	632982537	-	B3	9	1866	457	8.86	50493.6	-	0.844675	Cluster2
TraesCS2D02G585400.1	2D	TraesCS2D02G585400	644389819	644390106	+	B3	1	288	95	6.25	10764.5	-	-	#N/A
TraesCS2D02G591900.1	2D	TraesCS2D02G591900	647089896	647090183	-	B3	1	288	95	8.95	10710.5	-	-	#N/A
TraesCS3A02G005300.1	3A	TraesCS3A02G005300	5991467	5993606	-	B3	4	1000	206	4.08	23096.7	-	0.958854	Cluster2
TraesCS3A02G135900.1	3A	TraesCS3A02G135900	113365783	113366070	-	B3	1	288	95	8.6	10727.6	-	-	#N/A
TraesCS3A02G154300.1	3A	TraesCS3A02G154300	145634971	145635258	+	B3	1	288	95	8.95	10790.6	-	1	Cluster1
TraesCS3A02G157500.1	3A	TraesCS3A02G157500	154658571	154663966	+	B3	13	2179	566	5.64	62251.7	-	0.854995	Cluster2
TraesCS3A02G223800.1	3A	TraesCS3A02G223800	418764096	418766050	-	B3	2	989	183	5.15	20649.5	-	0.761806	Cluster3
TraesCS3A02G249100.1	3A	TraesCS3A02G249100	467347596	467352085	-	B3	6	1402	234	5.79	26653.3	-	0.828002	Cluster1
TraesCS3A02G284300.1	3A	TraesCS3A02G284300	513294432	513296809	+	B3	4	952	217	4.02	24462.9	-	-	#N/A
TraesCS3A02G285500.1	3A	TraesCS3A02G285500	514110579	514113452	-	B3	3	2398	729	6.44	83290.3	-	0.827613	Cluster1
TraesCS3A02G285800.1	3A	TraesCS3A02G285800	514306461	514307846	-	B3	2	1314	405	9.5	44503.4	-	0.916152	Cluster6
TraesCS3A02G310500.1	3A	TraesCS3A02G310500	549422031	549425757	+	B3	8	2331	651	9.27	73481.4	-	0.930747	Cluster1
TraesCS3A02G310600.1	3A	TraesCS3A02G310600	549427511	549430463	+	B3	6	1838	553	8.9	61924.6	-	0.950057	Cluster1
TraesCS3A02G351900.1	3A	TraesCS3A02G351900	600089030	600089317	-	B3	1	288	95	6.26	10911.7	-	0.912032	Cluster5
TraesCS3A02G405100.1	3A	TraesCS3A02G405100	649814718	649816145	+	B3	5	1046	281	6.46	30796.8	-	0.860278	Cluster6
TraesCS3A02G417300.1	3A	TraesCS3A02G417300	659552136	659556535	-	B3	6	2495	692	8.63	73341.7	PO:0001040:dry seed stage	0.799889	Cluster1
TraesCS3A02G462000.1	3A	TraesCS3A02G462000	697471482	697474222	-	B3	5	1271	333	9.77	38072.1	-	0.945661	Cluster1
TraesCS3A02G462100.1	3A	TraesCS3A02G462100	697491548	697493166	-	B3	4	984	327	9.89	38087.1	-	0.972563	Cluster1
TraesCS3A02G483200.1	3A	TraesCS3A02G483200	713629819	713633888	-	B3	8	2060	567	9.04	63780.7	-	0.925957	Cluster1
TraesCS3A02G483400.1	3A	TraesCS3A02G483400	713663464	713665362	-	B3	5	1299	372	8.91	42089.9	-	0.939993	Cluster1
TraesCS3A02G483500.1	3A	TraesCS3A02G483500	713779716	713782001	-	B3	6	1566	521	8.73	59154.4	-	0.991077	Cluster1
TraesCS3A02G533900.1	3A	TraesCS3A02G533900	746203421	746204914	-	B3	6	603	200	9.16	23019.3	-	-	#N/A
TraesCS3B02G065000.1	3B	TraesCS3B02G065000	38212573	38213229	+	B3	1	657	218	10.2	24219.8	-	0.881145	Cluster6
TraesCS3B02G092600.1	3B	TraesCS3B02G092600	61875981	61876268	-	B3	1	288	95	7.81	10886.6	-	-	#N/A
TraesCS3B02G153600.1	3B	TraesCS3B02G153600	145951603	145954264	+	B3	6	1725	574	9.18	63964.1	-	0.948072	Cluster1
TraesCS3B02G184200.1	3B	TraesCS3B02G184200	199526509	199532263	+	B3	11	2150	516	6.28	56994.4	-	0.917428	Cluster1
TraesCS3B02G278000.1	3B	TraesCS3B02G278000	448231085	448234701	-	B3	7	1093	302	7.85	33827.2	-	0.788425	Cluster1
TraesCS3B02G298300.1	3B	TraesCS3B02G298300	478549671	478549956	-	B3	2	285	94	7.79	10664.4	-	-	#N/A
TraesCS3B02G319400.1	3B	TraesCS3B02G319400	513995714	513998537	-	B3	3	2371	721	7.11	82276.5	-	0.827046	Cluster1
TraesCS3B02G320100.1	3B	TraesCS3B02G320100	519051820	519053779	-	B3	5	1421	388	9.86	43065.7	-	0.851565	Cluster1
TraesCS3B02G348400.1	3B	TraesCS3B02G348400	557704325	557706224	+	B3	4	845	201	4.11	22356.9	-	0.9965	Cluster2
TraesCS3B02G381200.1	3B	TraesCS3B02G381200	598918513	598918800	+	B3	1	288	95	8.64	10717.5	-	1	Cluster5
TraesCS3B02G438800.1	3B	TraesCS3B02G438800	677998659	678000094	+	B3	5	1063	284	6.22	31573.4	-	0.88854	Cluster6
TraesCS3B02G452200.1	3B	TraesCS3B02G452200	693338347	693342798	-	B3	6	2488	688	8.44	72802.1	PO:0001040:dry seed stage	0.759463	Cluster1
TraesCS3B02G501800.1	3B	TraesCS3B02G501800	745589840	745590127	+	B3	1	288	95	6.26	10903.6	-	-	#N/A
TraesCS3B02G504800.1	3B	TraesCS3B02G504800	749091146	749093001	-	B3	5	1072	334	9.84	38414.4	-	0.958059	Cluster1
TraesCS3B02G504900.1	3B	TraesCS3B02G504900	749146613	749148939	-	B3	6	1304	346	9.87	39859	-	0.851581	Cluster1
TraesCS3B02G505100.1	3B	TraesCS3B02G505100	749311720	749313896	-	B3	4	954	317	9.96	37009	-	0.944878	Cluster1
TraesCS3B02G530100.1	3B	TraesCS3B02G530100	771323933	771328353	-	B3	8	1764	587	9.04	66186.6	-	0.928273	Cluster1
TraesCS3B02G530200.1	3B	TraesCS3B02G530200	771386899	771395688	-	B3	12	2744	719	7.94	81414.5	-	0.917694	Cluster1
TraesCS3B02G530300.1	3B	TraesCS3B02G530300	771399904	771410318	-	B3	6	1738	414	9	47399.1	-	0.95299	Cluster1
TraesCS3B02G530400.1	3B	TraesCS3B02G530400	771412665	771412952	-	B3	1	288	95	6.26	10879.6	-	1	Cluster7
TraesCS3B02G546000.1	3B	TraesCS3B02G546000	782819893	782820180	+	B3	1	288	95	9.44	10879.8	-	-	#N/A
TraesCS3B02G550700.1	3B	TraesCS3B02G550700	785498667	785499577	+	B3	2	822	273	6.17	29319.8	-	0.969449	Cluster6
TraesCS3B02G574100.1	3B	TraesCS3B02G574100	804611341	804611628	+	B3	1	288	95	6.26	10931.7	-	1	Cluster5
TraesCS3B02G579000.1	3B	TraesCS3B02G579000	808444422	808446800	-	B3	5	1392	463	9.41	52643.7	-	1	Cluster1
TraesCS3B02G610700.1	3B	TraesCS3B02G610700	829054314	829055603	+	B3	5	681	226	9.14	25772.1	-	0.97058	Cluster7
TraesCS3D02G015500.1	3D	TraesCS3D02G015500	5430178	5430465	-	B3	1	288	95	6.81	10747.5	-	0.916413	Cluster2
TraesCS3D02G019600.1	3D	TraesCS3D02G019600	6529685	6529972	-	B3	1	288	95	7.8	10795.6	-	-	#N/A
TraesCS3D02G102600.1	3D	TraesCS3D02G102600	55164840	55165127	+	B3	1	288	95	6.25	10676.4	-	0.970711	Cluster2
TraesCS3D02G103000.1	3D	TraesCS3D02G103000	55369932	55370462	+	B3	1	531	176	5.46	19749.7	-	0.9067	Cluster1
TraesCS3D02G136400.1	3D	TraesCS3D02G136400	94847472	94851256	+	B3	9	2107	647	9.15	72401.8	-	0.927091	Cluster1
TraesCS3D02G136500.1	3D	TraesCS3D02G136500	94852259	94855519	+	B3	7	1779	592	9.19	66197.8	-	0.892341	Cluster1
TraesCS3D02G137400.1	3D	TraesCS3D02G137400	95957947	95958234	-	B3	1	288	95	7.79	10703.5	-	0.996234	Cluster4
TraesCS3D02G148800.1	3D	TraesCS3D02G148800	113912070	113912357	-	B3	1	288	95	8.58	10704.5	-	1	Cluster5
TraesCS3D02G151900.1	3D	TraesCS3D02G151900	116088424	116088711	+	B3	1	288	95	9.56	10718.7	-	1	Cluster5
TraesCS3D02G154200.1	3D	TraesCS3D02G154200	121531714	121532001	+	B3	1	288	95	8.62	10788.6	-	1	Cluster1
TraesCS3D02G165100.1	3D	TraesCS3D02G165100	136721778	136727300	+	B3	11	2059	541	5.73	59682.1	-	0.964485	Cluster1
TraesCS3D02G238900.1	3D	TraesCS3D02G238900	330475967	330478334	-	B3	4	1048	238	4.36	26779.3	-	0.952058	Cluster2
TraesCS3D02G249100.1	3D	TraesCS3D02G249100	348429772	348433462	-	B3	7	1206	301	8.55	33767.2	-	0.789216	Cluster1
TraesCS3D02G285300.1	3D	TraesCS3D02G285300	394752686	394756943	-	B3	4	2472	729	7.57	83339.6	-	0.782985	Cluster1
TraesCS3D02G285600.1	3D	TraesCS3D02G285600	394920956	394922370	-	B3	2	1323	407	9.54	44886	-	0.893485	Cluster1
TraesCS3D02G365300.1	3D	TraesCS3D02G365300	479623717	479624004	+	B3	1	288	95	6.81	10789.5	-	0.988465	Cluster7
TraesCS3D02G384400.1	3D	TraesCS3D02G384400	499957745	499959959	+	B3	5	1863	620	6.22	67466.8	-	0.933314	Cluster1
TraesCS3D02G400500.1	3D	TraesCS3D02G400500	515263532	515264769	+	B3	5	861	286	8.15	31253.3	-	0.898526	Cluster6
TraesCS3D02G412800.1	3D	TraesCS3D02G412800	525469559	525473995	-	B3	6	2472	692	8.44	73123.4	PO:0001040:dry seed stage	0.754079	Cluster1
TraesCS3D02G455700.1	3D	TraesCS3D02G455700	561761663	561763986	-	B3	6	1326	337	9.8	38624.6	-	0.876969	Cluster1
TraesCS3D02G455800.1	3D	TraesCS3D02G455800	561890406	561892669	-	B3	4	1011	336	9.74	38837.8	-	0.963311	Cluster1
TraesCS3D02G478100.1	3D	TraesCS3D02G478100	577871051	577873311	+	B3	5	1625	477	8.55	53867.8	-	0.947508	Cluster1
TraesCS3D02G478600.1	3D	TraesCS3D02G478600	578063557	578067973	-	B3	8	1975	531	8.89	59600.9	-	0.891082	Cluster1
TraesCS3D02G478700.1	3D	TraesCS3D02G478700	578104983	578109272	-	B3	11	2133	710	8.31	80447.8	-	0.797717	Cluster3
TraesCS3D02G504400.1	3D	TraesCS3D02G504400	591973912	591975034	+	B3	2	774	257	9.51	28802	-	0.481695	Cluster1
TraesCS3D02G539200.1	3D	TraesCS3D02G539200	611304221	611305778	+	B3	5	699	232	9.62	26647.3	-	-	#N/A
TraesCS4A02G003900.1	4A	TraesCS4A02G003900	2942890	2945449	+	B3	6	1012	244	8.66	27418.2	-	0.839264	Cluster1
TraesCS4A02G053000.1	4A	TraesCS4A02G053000	45103966	45106116	-	B3	5	1726	386	8.64	43134.6	-	0.863652	Cluster2
TraesCS4A02G055500.1	4A	TraesCS4A02G055500	46282730	46284222	+	B3	5	1146	288	5.87	32657.4	-	0.695425	Cluster6
TraesCS4A02G055700.1	4A	TraesCS4A02G055700	46422765	46424784	+	B3	5	1282	268	6.51	29782.2	-	0.924819	Cluster2
TraesCS4A02G064100.1	4A	TraesCS4A02G064100	60891209	60893056	+	B3	2	873	156	4.89	17736.3	-	0.972762	Cluster2
TraesCS4A02G066000.1	4A	TraesCS4A02G066000	63522181	63522468	+	B3	1	288	95	7.75	10905.8	-	0.990227	Cluster2
TraesCS4A02G167900.1	4A	TraesCS4A02G167900	418071689	418072416	-	B3	2	585	194	5.1	22076.1	-	0.760947	Cluster3
TraesCS4A02G170200.1	4A	TraesCS4A02G170200	429487603	429490132	+	B3	5	1152	267	4.16	30014.2	-	0.986081	Cluster2
TraesCS4A02G189300.1	4A	TraesCS4A02G189300	468210429	468210704	-	B3	1	276	91	9.34	10446.4	-	1	Cluster2
TraesCS4A02G198300.1	4A	TraesCS4A02G198300	483949823	483951642	-	B3	3	1581	278	8.23	31355.1	-	0.83964	Cluster6
TraesCS4A02G201100.1	4A	TraesCS4A02G201100	490341785	490342844	+	B3	3	879	260	4.24	29387.6	-	0.971522	Cluster2
TraesCS4A02G214700.1	4A	TraesCS4A02G214700	513082684	513087827	+	B3	5	2321	619	9.22	68974.6	-	0.605327	Cluster1
TraesCS4A02G222500.1	4A	TraesCS4A02G222500	529629746	529631972	-	B3	3	993	330	9.23	36602.6	PO:0020094:plant egg cell	0.72449	Cluster3
TraesCS4A02G225600.1	4A	TraesCS4A02G225600	533459478	533463467	+	B3	6	1680	559	9.38	62854.6	-	1	Cluster1
TraesCS4A02G233700.1	4A	TraesCS4A02G233700	542532836	542533493	-	B3	2	561	186	8.76	20812.1	-	0.976742	Cluster1
TraesCS4A02G233800.1	4A	TraesCS4A02G233800	542553270	542556316	-	B3	8	1882	525	8.5	59640.7	-	0.941836	Cluster1
TraesCS4A02G233900.1	4A	TraesCS4A02G233900	542617788	542621200	-	B3	10	1963	521	9.14	58636.5	-	0.953506	Cluster1
TraesCS4A02G241300.1	4A	TraesCS4A02G241300	551132424	551133863	+	B3	4	1023	340	8.76	39139.3	-	0.940138	Cluster1
TraesCS4A02G241500.1	4A	TraesCS4A02G241500	551216843	551220754	+	B3	8	2018	525	7.87	58980	-	0.881253	Cluster6
TraesCS4A02G241900.1	4A	TraesCS4A02G241900	552147312	552152880	-	B3	8	2491	671	7.83	76612.9	-	0.772162	Cluster1
TraesCS4A02G242000.1	4A	TraesCS4A02G242000	552195687	552197461	-	B3	4	1148	312	9.2	36330.2	-	0.918366	Cluster1
TraesCS4A02G242300.1	4A	TraesCS4A02G242300	552254429	552259189	-	B3	9	2065	601	9.04	67466.8	-	0.919268	Cluster1
TraesCS4A02G242400.1	4A	TraesCS4A02G242400	552407749	552409504	+	B3	4	1376	356	8.86	39429.4	-	0.964517	Cluster7
TraesCS4A02G280200.1	4A	TraesCS4A02G280200	588658822	588659109	-	B3	1	288	95	8.48	10836.6	-	-	#N/A
TraesCS4A02G283000.1	4A	TraesCS4A02G283000	590123082	590127454	-	B3	7	2446	561	6.41	63180	-	0.541838	Cluster1
TraesCS4A02G313800.1	4A	TraesCS4A02G313800	604107861	604111558	+	B3	10	1890	532	7.29	58530.5	-	0.973122	Cluster1
TraesCS4A02G357500.1	4A	TraesCS4A02G357500	630876564	630878088	-	B3	4	666	221	7.19	25726.8	-	0.61571	Cluster2
TraesCS4A02G357600.1	4A	TraesCS4A02G357600	630897051	630899273	-	B3	5	987	233	6.88	27018.2	-	0.494238	Cluster1
TraesCS4A02G357900.1	4A	TraesCS4A02G357900	631475883	631478595	+	B3	4	1401	268	7.71	31118	-	0.665932	Cluster6
TraesCS4A02G358000.1	4A	TraesCS4A02G358000	631494175	631498897	+	B3	5	1115	235	9.06	27247.8	-	0.627313	Cluster1
TraesCS4A02G363200.1	4A	TraesCS4A02G363200	636640579	636643953	+	B3	7	2081	531	6.88	59816.9	-	0.457557	Cluster1
TraesCS4A02G386800.1	4A	TraesCS4A02G386800	664443319	664446087	-	B3	6	1694	524	8.43	60110	-	-	#N/A
TraesCS4A02G426200.1	4A	TraesCS4A02G426200	697947196	697950308	+	B3	7	1220	230	9.8	26398.9	-	0.668808	Cluster1
TraesCS4A02G429600.1	4A	TraesCS4A02G429600	700449628	700450459	-	B3	3	666	221	4.35	24616.7	-	-	#N/A
TraesCS4A02G457200.1	4A	TraesCS4A02G457200	722414858	722415789	+	B3	3	447	148	5.21	16535.9	-	0.973122	Cluster6
TraesCS4A02G458500.1	4A	TraesCS4A02G458500	723709354	723710058	+	B3	2	505	165	6.15	18676.4	-	-	#N/A
TraesCS4A02G464900.1	4A	TraesCS4A02G464900	728506495	728511279	+	B3	6	4269	1315	7.93	149098	-	1	Cluster1
TraesCS4A02G472700.1	4A	TraesCS4A02G472700	732788530	732789451	-	B3	1	922	217	11.15	23499.2	-	0.999524	Cluster4
TraesCS4A02G495200.1	4A	TraesCS4A02G495200	742383011	742386222	-	B3	11	1749	521	5.56	58210.7	-	1	Cluster3
TraesCS4B02G019500.1	4B	TraesCS4B02G019500	14028030	14028317	-	B3	1	288	95	6.25	10788.5	-	0.904152	Cluster5
TraesCS4B02G030300.1	4B	TraesCS4B02G030300	22564475	22575232	-	B3	6	1647	305	8.2	34567.4	-	0.336376	Cluster1
TraesCS4B02G072700.1	4B	TraesCS4B02G072700	68095055	68096883	-	B3	5	1350	356	9.17	39712.1	-	0.939971	Cluster7
TraesCS4B02G072800.1	4B	TraesCS4B02G072800	68098882	68101277	-	B3	5	1503	341	9.12	39075.9	-	0.916533	Cluster1
TraesCS4B02G072900.1	4B	TraesCS4B02G072900	68117038	68121435	+	B3	9	2106	601	8.98	67314.8	-	0.893201	Cluster1
TraesCS4B02G073100.1	4B	TraesCS4B02G073100	68358124	68362621	+	B3	7	2637	655	7.36	75582.9	-	0.760236	Cluster1
TraesCS4B02G073200.1	4B	TraesCS4B02G073200	68400598	68406081	+	B3	8	2515	677	8.19	77415.9	-	0.842624	Cluster1
TraesCS4B02G073400.1	4B	TraesCS4B02G073400	68665425	68669459	-	B3	8	2233	527	7.31	59320.4	-	0.842926	Cluster6
TraesCS4B02G073600.1	4B	TraesCS4B02G073600	68890829	68895752	-	B3	7	1674	557	6.42	62752.1	-	0.922737	Cluster6
TraesCS4B02G081600.1	4B	TraesCS4B02G081600	79996822	80000363	+	B3	9	2025	528	9	59476.4	-	0.881194	Cluster1
TraesCS4B02G081700.1	4B	TraesCS4B02G081700	80556461	80559700	+	B3	8	2148	492	6.56	55509.7	-	0.903493	Cluster1
TraesCS4B02G081800.1	4B	TraesCS4B02G081800	80585660	80588285	+	B3	6	1722	491	6.56	55438.6	-	0.863849	Cluster1
TraesCS4B02G081900.1	4B	TraesCS4B02G081900	80593562	80595194	+	B3	4	1146	343	8.89	39137.3	-	0.91661	Cluster1
TraesCS4B02G094000.1	4B	TraesCS4B02G094000	96636570	96638707	+	B3	3	993	330	9.3	36532.6	PO:0020094:plant egg cell	0.674983	Cluster3
TraesCS4B02G101400.1	4B	TraesCS4B02G101400	106971617	106977017	-	B3	5	2472	663	8.73	73661.6	-	0.533345	Cluster1
TraesCS4B02G117100.1	4B	TraesCS4B02G117100	135211304	135213059	+	B3	3	1569	279	7.74	31273.9	-	0.883111	Cluster6
TraesCS4B02G164600.1	4B	TraesCS4B02G164600	343639105	343641288	+	B3	4	1000	275	5.7	31034.6	-	0.962453	Cluster2
TraesCS4B02G164700.1	4B	TraesCS4B02G164700	343786591	343788892	+	B3	5	1052	197	4.58	22385	-	0.954974	Cluster1
TraesCS4B02G249100.1	4B	TraesCS4B02G249100	515051205	515052250	-	B3	2	922	204	9.58	23136	-	0.815971	Cluster6
TraesCS4B02G251500.1	4B	TraesCS4B02G251500	517622558	517623667	+	B3	4	819	272	6.42	30541.2	-	0.868968	Cluster2
TraesCS4B02G273700.1	4B	TraesCS4B02G273700	551731107	551731394	+	B3	1	288	95	6.81	10813.6	-	0.973331	Cluster3
TraesCS4B02G301400.1	4B	TraesCS4B02G301400	588198663	588201404	-	B3	6	1189	244	8.34	27405.2	-	0.77968	Cluster1
TraesCS4B02G348500.1	4B	TraesCS4B02G348500	641890447	641891406	-	B3	1	960	319	9.03	34795	-	0.886826	Cluster4
TraesCS4B02G352600.1	4B	TraesCS4B02G352600	644593282	644595485	+	B3	4	773	109	8.73	12846	-	-	#N/A
TraesCS4B02G370300.1	4B	TraesCS4B02G370300	656165914	656166201	-	B3	1	288	95	6.82	10843.6	-	1	Cluster6
TraesCS4B02G373300.1	4B	TraesCS4B02G373300	657827827	657828114	+	B3	1	288	95	9.3	10903.8	-	-	#N/A
TraesCS4D02G027700.1	4D	TraesCS4D02G027700	12417197	12418832	-	B3	4	1133	373	6.1	42111	-	0.923628	Cluster5
TraesCS4D02G071500.1	4D	TraesCS4D02G071500	46596500	46597942	-	B3	4	1074	357	9.1	39930.3	-	0.953195	Cluster7
TraesCS4D02G071600.1	4D	TraesCS4D02G071600	46603172	46605688	-	B3	5	1353	292	7.11	33053.6	-	0.92157	Cluster1
TraesCS4D02G071700.1	4D	TraesCS4D02G071700	46619443	46624145	+	B3	9	2077	602	9.14	67659.3	-	0.909377	Cluster1
TraesCS4D02G071900.1	4D	TraesCS4D02G071900	46653304	46658739	+	B3	8	2390	671	8.31	76507.7	-	0.853071	Cluster1
TraesCS4D02G072200.1	4D	TraesCS4D02G072200	47334365	47337469	-	B3	7	1698	509	6.61	57539.5	-	0.972313	Cluster1
TraesCS4D02G080200.1	4D	TraesCS4D02G080200	54261815	54266356	+	B3	8	1754	525	8.94	59087.8	-	0.897336	Cluster1
TraesCS4D02G080400.1	4D	TraesCS4D02G080400	54474398	54476568	+	B3	5	1353	341	9.46	38931.2	-	0.920176	Cluster1
TraesCS4D02G080500.1	4D	TraesCS4D02G080500	54604350	54605788	+	B3	4	1038	345	8.91	39065.8	-	0.979616	Cluster1
TraesCS4D02G090800.1	4D	TraesCS4D02G090800	65934232	65936617	+	B3	3	1131	316	9.25	35096.9	PO:0020094:plant egg cell	0.729576	Cluster3
TraesCS4D02G098100.1	4D	TraesCS4D02G098100	74607942	74613341	-	B3	5	2627	648	8.88	72153.9	-	0.638982	Cluster1
TraesCS4D02G114900.1	4D	TraesCS4D02G114900	95781089	95782029	+	B3	2	849	282	7.26	31546.1	-	0.906371	Cluster6
TraesCS4D02G120800.1	4D	TraesCS4D02G120800	102105625	102105912	-	B3	1	288	95	6.25	10684.3	-	0.930728	Cluster3
TraesCS4D02G130500.1	4D	TraesCS4D02G130500	116523280	116523567	-	B3	1	288	95	7.81	10802.5	-	-	#N/A
TraesCS4D02G158600.1	4D	TraesCS4D02G158600	222629301	222629859	-	B3	3	375	124	7.1	14655.8	-	0.986129	Cluster2
TraesCS4D02G198700.1	4D	TraesCS4D02G198700	345355601	345356137	+	B3	1	537	178	6.99	20287.3	-	0.982447	Cluster1
TraesCS4D02G249200.1	4D	TraesCS4D02G249200	418397226	418399082	-	B3	5	1193	268	6.76	29853.4	-	0.919884	Cluster2
TraesCS4D02G249400.1	4D	TraesCS4D02G249400	418567343	418568899	-	B3	4	1126	283	5.91	32112.1	-	0.926203	Cluster6
TraesCS4D02G251500.1	4D	TraesCS4D02G251500	419460660	419462596	+	B3	5	1500	422	9.58	47453.8	-	0.856613	Cluster2
TraesCS4D02G297100.1	4D	TraesCS4D02G297100	466290357	466290646	+	B3	2	288	95	5.45	10707.4	-	-	#N/A
TraesCS4D02G299700.1	4D	TraesCS4D02G299700	468598274	468600900	-	B3	6	1106	241	8.35	27097.9	-	0.762889	Cluster1
TraesCS4D02G305000.1	4D	TraesCS4D02G305000	473764934	473773230	-	B3	2	288	95	6.89	10697.5	-	-	#N/A
TraesCS4D02G328500.1	4D	TraesCS4D02G328500	487078338	487078625	-	B3	1	288	95	7.81	10742.5	-	0.968816	Cluster2
TraesCS4D02G332400.1	4D	TraesCS4D02G332400	490087962	490088249	-	B3	1	288	95	8.62	10772.5	-	-	#N/A
TraesCS4D02G348900.1	4D	TraesCS4D02G348900	502396614	502403903	+	B3	12	3714	988	5.74	110047	-	0.985833	Cluster7
TraesCS4D02G354600.1	4D	TraesCS4D02G354600	504271326	504271613	+	B3	1	288	95	7.79	10773.6	-	0.997887	Cluster5
TraesCS5A02G065000.1	5A	TraesCS5A02G065000	70457503	70459568	-	B3	5	1223	355	7.6	41311.8	-	0.975836	Cluster1
TraesCS5A02G065100.1	5A	TraesCS5A02G065100	70461327	70463417	-	B3	5	1133	355	8.23	41300.9	-	0.954777	Cluster1
TraesCS5A02G066600.1	5A	TraesCS5A02G066600	74481535	74485708	+	B3	8	1590	529	9.15	60656.4	-	0.883697	Cluster1
TraesCS5A02G066700.1	5A	TraesCS5A02G066700	74487006	74488287	+	B3	3	984	320	5.53	36238.3	-	0.895561	Cluster1
TraesCS5A02G066800.1	5A	TraesCS5A02G066800	74495363	74499316	+	B3	10	2379	521	6.45	59904.3	-	0.718952	Cluster3
TraesCS5A02G066900.1	5A	TraesCS5A02G066900	74588647	74593394	+	B3	10	3220	675	8.72	77592.4	-	0.854021	Cluster1
TraesCS5A02G067000.1	5A	TraesCS5A02G067000	74671152	74675178	+	B3	8	2731	754	8.9	86372.7	-	0.935202	Cluster1
TraesCS5A02G090100.1	5A	TraesCS5A02G090100	121408816	121415147	+	B3	11	3687	1037	6.15	113229	-	0.491732	Cluster1
TraesCS5A02G095700.1	5A	TraesCS5A02G095700	133817213	133819684	+	B3	4	1202	224	4.16	25109.9	-	0.996323	Cluster2
TraesCS5A02G127100.1	5A	TraesCS5A02G127100	282586449	282588040	-	B3	3	1366	266	7.15	29867.2	-	0.853235	Cluster1
TraesCS5A02G140100.1	5A	TraesCS5A02G140100	312258917	312259447	-	B3	1	531	176	5.68	19826.7	-	0.979689	Cluster2
TraesCS5A02G172500.1	5A	TraesCS5A02G172500	365666052	365666339	+	B3	1	288	95	8.95	10744.6	-	0.991941	Cluster3
TraesCS5A02G298100.1	5A	TraesCS5A02G298100	505534130	505536200	-	B3	3	1868	434	6.63	47391.1	-	0.925034	Cluster6
TraesCS5A02G335800.1	5A	TraesCS5A02G335800	544897667	544899961	+	B3	4	1065	217	4.3	24263	-	0.940186	Cluster2
TraesCS5A02G363700.1	5A	TraesCS5A02G363700	564175584	564178996	-	B3	9	1618	448	5.63	50321.5	-	0.83484	Cluster2
TraesCS5A02G363800.1	5A	TraesCS5A02G363800	564240321	564243907	-	B3	7	1903	537	-	-	-	0.644898	Cluster1
TraesCS5A02G387400.1	5A	TraesCS5A02G387400	584547646	584552457	+	B3	8	2417	672	5.77	76706.6	-	0.935785	Cluster2
TraesCS5A02G415500.1	5A	TraesCS5A02G415500	604230780	604231067	-	B3	1	288	95	9.03	10770.5	-	-	#N/A
TraesCS5A02G438500.1	5A	TraesCS5A02G438500	619852506	619853880	+	B3	4	930	309	8.26	35464.6	-	1	Cluster2
TraesCS5A02G438600.1	5A	TraesCS5A02G438600	619955551	619959823	+	B3	7	1955	582	8.57	66758.4	-	0.85606	Cluster1
TraesCS5A02G438700.1	5A	TraesCS5A02G438700	619967540	619970730	+	B3	6	2131	577	6.38	66124.5	-	0.98804	Cluster1
TraesCS5A02G477700.1	5A	TraesCS5A02G477700	651641948	651642235	-	B3	1	288	95	8.6	10858.7	-	-	#N/A
TraesCS5A02G482700.1	5A	TraesCS5A02G482700	654108863	654111286	-	B3	7	1116	371	8.18	42066.1	-	0.409173	Cluster1
TraesCS5A02G516600.1	5A	TraesCS5A02G516600	679873789	679875709	-	B3	1	1921	317	9.03	34541.7	-	0.828013	Cluster4
TraesCS5A02G524700.1	5A	TraesCS5A02G524700	685432302	685442014	+	B3	13	3122	963	5.72	106895	-	0.962472	Cluster4
TraesCS5B02G031400.1	5B	TraesCS5B02G031400	34491388	34491675	+	B3	1	288	95	9.1	10766.6	-	-	#N/A
TraesCS5B02G071900.1	5B	TraesCS5B02G071900	83618884	83621170	-	B3	5	1400	355	6.61	41437	-	0.957304	Cluster1
TraesCS5B02G072600.1	5B	TraesCS5B02G072600	84924931	84926705	-	B3	4	1155	384	8.87	43336.4	-	0.677923	Cluster3
TraesCS5B02G073300.1	5B	TraesCS5B02G073300	87233232	87237202	+	B3	8	2102	518	9.25	60039.9	-	0.868355	Cluster1
TraesCS5B02G073400.1	5B	TraesCS5B02G073400	87239199	87241163	+	B3	5	1212	387	5.6	44414.4	-	0.982045	Cluster6
TraesCS5B02G073500.1	5B	TraesCS5B02G073500	87289756	87295425	+	B3	10	2775	640	6.53	74026.3	-	0.611916	Cluster3
TraesCS5B02G073600.1	5B	TraesCS5B02G073600	87651579	87653267	+	B3	5	1125	374	9.42	42672.8	-	0.948002	Cluster1
TraesCS5B02G073700.1	5B	TraesCS5B02G073700	87764691	87767505	+	B3	7	2037	678	8.74	77651.6	-	0.679095	Cluster3
TraesCS5B02G073800.1	5B	TraesCS5B02G073800	87967139	87971789	+	B3	9	2756	711	8.71	80925.6	-	0.721354	Cluster1
TraesCS5B02G077100.1	5B	TraesCS5B02G077100	93207085	93207372	+	B3	1	288	95	7.8	10795.6	-	-	#N/A
TraesCS5B02G082900.1	5B	TraesCS5B02G082900	103528399	103528686	-	B3	1	288	95	9.07	11131	-	-	#N/A
TraesCS5B02G095900.1	5B	TraesCS5B02G095900	126596019	126603537	+	B3	10	3213	1070	6.44	116491	-	0.470915	Cluster3
TraesCS5B02G116800.1	5B	TraesCS5B02G116800	202891110	202892888	-	B3	2	790	184	5.49	20534.5	-	0.906866	Cluster2
TraesCS5B02G126200.1	5B	TraesCS5B02G126200	230247028	230248629	-	B3	3	1377	265	7.78	29862.3	-	0.856293	Cluster1
TraesCS5B02G142400.1	5B	TraesCS5B02G142400	268439234	268439521	+	B3	1	288	95	7.79	10874.7	-	1	Cluster3
TraesCS5B02G179400.1	5B	TraesCS5B02G179400	327195480	327195767	+	B3	1	288	95	6.71	10765.5	-	-	#N/A
TraesCS5B02G206500.1	5B	TraesCS5B02G206500	375710969	375711256	-	B3	1	288	95	6.81	10821.6	-	1	Cluster1
TraesCS5B02G297100.1	5B	TraesCS5B02G297100	479838745	479840728	-	B3	4	1522	355	6.28	38898.2	-	0.87689	Cluster6
TraesCS5B02G365800.1	5B	TraesCS5B02G365800	544399237	544403132	-	B3	7	2877	418	5.33	45959.3	-	0.720347	Cluster5
TraesCS5B02G392500.1	5B	TraesCS5B02G392500	571199989	571205045	+	B3	8	2473	686	5.97	77942	-	0.746756	Cluster5
TraesCS5B02G441400.1	5B	TraesCS5B02G441400	613630248	613632462	+	B3	5	1275	424	6.41	48974.9	-	0.965775	Cluster1
TraesCS5B02G441500.1	5B	TraesCS5B02G441500	613645354	613649800	+	B3	7	2028	562	6.56	64924.3	-	0.992972	Cluster1
TraesCS5B02G467600.1	5B	TraesCS5B02G467600	641299319	641299606	-	B3	1	288	95	6.81	10680.5	-	-	#N/A
TraesCS5B02G495900.1	5B	TraesCS5B02G495900	663134978	663136733	-	B3	6	1256	318	8.77	36318.7	-	0.353348	Cluster1
TraesCS5B02G510500.1	5B	TraesCS5B02G510500	676111859	676115366	-	B3	6	2168	483	6.57	54004.2	-	0.643083	Cluster6
TraesCS5B02G514600.1	5B	TraesCS5B02G514600	679401508	679405389	-	B3	5	1069	236	6.61	27141.5	-	0.863906	Cluster1
TraesCS5B02G515000.1	5B	TraesCS5B02G515000	679672131	679674635	+	B3	5	982	231	8.33	26880.2	-	0.709552	Cluster1
TraesCS5B02G516700.1	5B	TraesCS5B02G516700	680627610	680627897	-	B3	1	288	95	6.81	10803.6	-	-	#N/A
TraesCS5B02G541900.1	5B	TraesCS5B02G541900	696117988	696118275	+	B3	1	288	95	8.98	10789.6	-	1	Cluster3
TraesCS5D02G057300.1	5D	TraesCS5D02G057300	53892744	53896576	-	B3	3	664	117	4.52	13133.5	-	0.68628	Cluster1
TraesCS5D02G075900.1	5D	TraesCS5D02G075900	75279268	75281502	-	B3	5	1226	355	6.84	41347.8	-	0.952873	Cluster1
TraesCS5D02G076700.1	5D	TraesCS5D02G076700	76101205	76106383	-	B3	9	2508	835	8.98	94511.9	-	0.780691	Cluster3
TraesCS5D02G076800.1	5D	TraesCS5D02G076800	76202801	76207287	-	B3	5	1803	361	8.78	40723.3	-	0.27866	Cluster3
TraesCS5D02G076900.1	5D	TraesCS5D02G076900	76213896	76222078	-	B3	9	2334	777	8.64	88887.8	-	0.94447	Cluster1
TraesCS5D02G077700.1	5D	TraesCS5D02G077700	77582033	77585591	+	B3	7	1943	255	8.68	29071.1	-	0.802226	Cluster1
TraesCS5D02G077800.1	5D	TraesCS5D02G077800	77586314	77588489	+	B3	5	1383	386	5.05	44411	-	0.820817	Cluster1
TraesCS5D02G077900.1	5D	TraesCS5D02G077900	77736145	77740336	+	B3	9	2442	711	6.75	81572.4	-	0.488717	Cluster1
TraesCS5D02G078100.1	5D	TraesCS5D02G078100	78010371	78013157	+	B3	7	2031	676	8.43	78000.9	-	0.977448	Cluster1
TraesCS5D02G078200.1	5D	TraesCS5D02G078200	78050914	78055504	+	B3	8	3296	754	8.72	86763.3	-	0.716837	Cluster1
TraesCS5D02G102200.1	5D	TraesCS5D02G102200	115398517	115405138	+	B3	11	3762	1076	5.95	116796	-	0.512128	Cluster3
TraesCS5D02G128900.1	5D	TraesCS5D02G128900	201838672	201838959	+	B3	1	288	95	7.87	10697.5	-	0.97723	Cluster1
TraesCS5D02G134700.1	5D	TraesCS5D02G134700	214918171	214919787	-	B3	3	1384	266	7.21	29906.3	-	0.850149	Cluster1
TraesCS5D02G170200.1	5D	TraesCS5D02G170200	267072583	267072870	+	B3	1	288	95	9.03	10747.5	-	1	Cluster1
TraesCS5D02G207700.1	5D	TraesCS5D02G207700	313519535	313520580	-	B3	3	865	182	4.59	21069.2	-	0.97619	Cluster2
TraesCS5D02G239300.1	5D	TraesCS5D02G239300	347376778	347377308	-	B3	1	531	176	5.46	19662.6	-	0.951219	Cluster5
TraesCS5D02G264400.1	5D	TraesCS5D02G264400	369344562	369344849	+	B3	1	288	95	6.25	10835.6	-	1	Cluster5
TraesCS5D02G304900.1	5D	TraesCS5D02G304900	399959217	399960982	-	B3	4	1331	348	6.17	37754.9	-	0.879651	Cluster6
TraesCS5D02G371600.1	5D	TraesCS5D02G371600	445797518	445797805	-	B3	1	288	95	8.95	10736.5	-	0.968885	Cluster5
TraesCS5D02G372900.1	5D	TraesCS5D02G372900	446475921	446479364	-	B3	7	1956	524	6.23	58541.5	-	0.641523	Cluster6
TraesCS5D02G397300.1	5D	TraesCS5D02G397300	464099047	464109391	+	B3	9	2406	698	6.22	79932.3	-	0.745844	Cluster2
TraesCS5D02G411500.1	5D	TraesCS5D02G411500	474818998	474823730	-	B3	8	2393	743	5.96	84763.4	-	0.899936	Cluster2
TraesCS5D02G445800.1	5D	TraesCS5D02G445800	496076203	496077742	+	B3	4	1091	300	8.05	34678.6	-	0.546113	Cluster1
TraesCS5D02G496200.1	5D	TraesCS5D02G496200	526919605	526921193	-	B3	5	969	322	8.87	36179.3	-	0.825196	Cluster1
TraesCS5D02G496300.1	5D	TraesCS5D02G496300	527096701	527100368	-	B3	9	2071	318	8.3	36428.8	-	0.480978	Cluster1
TraesCS5D02G514900.1	5D	TraesCS5D02G514900	538420429	538425328	-	B3	5	1615	237	7.75	27362.8	-	0.664448	Cluster1
TraesCS5D02G515000.1	5D	TraesCS5D02G515000	538439279	538442440	-	B3	4	1303	340	8.87	38845.6	-	0.745048	Cluster1
TraesCS5D02G515100.1	5D	TraesCS5D02G515100	538621570	538623088	+	B3	4	705	234	6.38	27067.4	-	0.582224	Cluster1
TraesCS5D02G515200.1	5D	TraesCS5D02G515200	538655410	538661702	+	B3	5	913	233	7.25	27146.4	-	0.474896	Cluster6
TraesCS6A02G176600.1	6A	TraesCS6A02G176600	194787944	194794265	-	B3	6	3901	281	6.25	31055.2	-	0.631912	Cluster1
TraesCS6A02G197000.1	6A	TraesCS6A02G197000	290257434	290265574	+	B3	3	637	150	5.3	16811.4	-	0.82899	Cluster3
TraesCS6A02G213000.1	6A	TraesCS6A02G213000	387223693	387228618	+	B3	8	3349	916	7.35	101807	-	0.863056	Cluster1
TraesCS6A02G217800.1	6A	TraesCS6A02G217800	401364083	401366248	+	B3	4	895	231	4.12	25879.7	-	0.96168	Cluster2
TraesCS6A02G238700.1	6A	TraesCS6A02G238700	448231560	448232153	-	B3	1	594	197	7.69	21496.5	-	-	#N/A
TraesCS6A02G257800.1	6A	TraesCS6A02G257800	479911380	479911667	-	B3	1	288	95	8.6	10776.5	-	-	#N/A
TraesCS6A02G259600.1	6A	TraesCS6A02G259600	482619032	482621079	-	B3	1	2048	414	7.95	44293.6	-	0.793064	Cluster6
TraesCS6A02G324600.1	6A	TraesCS6A02G324600	558795419	558796527	+	B3	2	814	146	9.56	17031.4	-	0.914525	Cluster1
TraesCS6A02G399800.1	6A	TraesCS6A02G399800	609417754	609425258	+	B3	4	915	304	6.47	34664.5	-	0.797278	Cluster1
TraesCS6B02G094300.1	6B	TraesCS6B02G094300	70624799	70626749	+	B3	5	903	209	10.34	24441.8	-	0.981602	Cluster2
TraesCS6B02G119200.1	6B	TraesCS6B02G119200	113986875	113987164	+	B3	2	288	95	8.95	10712.5	-	-	#N/A
TraesCS6B02G241100.1	6B	TraesCS6B02G241100	422704349	422709061	-	B3	7	3040	922	8.23	103105	-	0.831115	Cluster1
TraesCS6B02G252600.1	6B	TraesCS6B02G252600	452620288	452620575	-	B3	1	288	95	7.78	10924.8	-	-	#N/A
TraesCS6B02G286900.1	6B	TraesCS6B02G286900	516879258	516880487	-	B3	1	1230	409	8.94	43850.1	-	0.774352	Cluster6
TraesCS6B02G319300.1	6B	TraesCS6B02G319300	567282101	567282388	+	B3	1	288	95	6.81	10962.8	-	-	#N/A
TraesCS6B02G353000.1	6B	TraesCS6B02G353000	618935448	618935735	+	B3	1	288	95	6.81	10717.4	-	1	Cluster1
TraesCS6B02G370200.1	6B	TraesCS6B02G370200	643870965	643871252	-	B3	1	288	95	8.95	10786.7	-	0.988385	Cluster2
TraesCS6B02G375300.1	6B	TraesCS6B02G375300	649826817	649827104	-	B3	1	288	95	6.81	10879.7	-	-	#N/A
TraesCS6B02G380400.1	6B	TraesCS6B02G380400	655066540	655066827	-	B3	1	288	95	6.26	10792.5	-	-	#N/A
TraesCS6B02G390400.1	6B	TraesCS6B02G390400	664686214	664686744	+	B3	1	531	176	5.79	19825.8	-	-	#N/A
TraesCS6B02G395800.1	6B	TraesCS6B02G395800	671865420	671865707	-	B3	1	288	95	7.86	10885.6	-	-	#N/A
TraesCS6B02G417900.1	6B	TraesCS6B02G417900	690431840	690432127	+	B3	1	288	95	6.25	10704.4	-	1	Cluster7
TraesCS6B02G440000.1	6B	TraesCS6B02G440000	705282349	705286201	+	B3	4	2290	531	5.55	57619.4	-	0.303216	Cluster1
TraesCS6D02G029800.1	6D	TraesCS6D02G029800	11695004	11695276	-	B3	1	273	90	6.71	10315	-	-	#N/A
TraesCS6D02G080700.1	6D	TraesCS6D02G080700	46526141	46527042	-	B3	3	717	238	4.4	26927.3	-	1	Cluster2
TraesCS6D02G090600.1	6D	TraesCS6D02G090600	56320558	56320845	+	B3	1	288	95	7.81	10785.6	-	1	Cluster3
TraesCS6D02G102000.1	6D	TraesCS6D02G102000	65353132	65357563	+	B3	7	1533	334	9.08	36432.4	-	0.542357	Cluster3
TraesCS6D02G194700.1	6D	TraesCS6D02G194700	270141863	270145462	-	B3	5	2763	920	7.75	102793	-	0.860136	Cluster1
TraesCS6D02G215700.1	6D	TraesCS6D02G215700	305746352	305746639	+	B3	1	288	95	8.6	10783.6	-	-	#N/A
TraesCS6D02G240600.1	6D	TraesCS6D02G240600	342471787	342473801	-	B3	1	2015	414	8.65	44298.5	-	0.794436	Cluster6
TraesCS6D02G347900.1	6D	TraesCS6D02G347900	446390623	446392120	-	B3	4	987	223	4.5	25165.6	-	0.949007	Cluster2
TraesCS6D02G348600.1	6D	TraesCS6D02G348600	446603350	446603637	-	B3	1	288	95	8.74	10685.5	-	1	Cluster5
TraesCS6D02G384000.1	6D	TraesCS6D02G384000	462602783	462605957	+	B3	4	1605	534	-	-	-	0.569193	Cluster3
TraesCS6D02G397100.1	6D	TraesCS6D02G397100	469236211	469236498	+	B3	1	288	95	6.81	10718.4	-	-	#N/A
TraesCS7A02G020700.1	7A	TraesCS7A02G020700	8403648	8404295	-	B3	1	648	215	10.72	23128.6	-	1	Cluster4
TraesCS7A02G020800.1	7A	TraesCS7A02G020800	8410460	8411107	-	B3	4	597	198	10.88	21342.5	-	1	Cluster4
TraesCS7A02G031000.1	7A	TraesCS7A02G031000	12809300	12814061	-	B3	5	948	315	6.01	35413.1	-	0.730037	Cluster1
TraesCS7A02G032400.1	7A	TraesCS7A02G032400	13790087	13791047	-	B3	3	681	143	6.42	16011.3	-	0.963093	Cluster6
TraesCS7A02G062700.1	7A	TraesCS7A02G062700	31104549	31107458	-	B3	7	1046	230	9.78	26425	-	0.664612	Cluster1
TraesCS7A02G087900.1	7A	TraesCS7A02G087900	52950103	52953600	-	B3	6	2414	524	8.34	60550.4	-	0.979598	Cluster1
TraesCS7A02G179800.1	7A	TraesCS7A02G179800	134481464	134485956	+	B3	7	945	233	9.93	26878.8	-	0.8285	Cluster1
TraesCS7A02G186500.1	7A	TraesCS7A02G186500	141311293	141311580	-	B3	1	288	95	8.48	10806.6	-	-	#N/A
TraesCS7A02G244300.1	7A	TraesCS7A02G244300	221705932	221706219	+	B3	1	288	95	7.74	10830.7	-	-	#N/A
TraesCS7A02G329600.1	7A	TraesCS7A02G329600	481247738	481251192	-	B3	10	1413	345	6.22	37582.2	-	0.511994	Cluster1
TraesCS7A02G392500.1	7A	TraesCS7A02G392500	569395381	569397760	+	B3	4	809	234	8.58	26008.3	-	0.93455	Cluster6
TraesCS7A02G399500.1	7A	TraesCS7A02G399500	579481628	579484004	-	B3	4	1002	204	4.05	22790.2	-	0.944125	Cluster2
TraesCS7A02G417300.1	7A	TraesCS7A02G417300	608991007	608994390	-	B3	7	1854	480	6.94	53931.9	-	0.610573	Cluster1
TraesCS7A02G461000.1	7A	TraesCS7A02G461000	657155071	657155779	+	B3	1	709	195	10.31	20743.6	-	0.99835	Cluster4
TraesCS7A02G492300.1	7A	TraesCS7A02G492300	680902892	680903179	-	B3	1	288	95	8.84	10690.5	-	-	#N/A
TraesCS7A02G499500.1	7A	TraesCS7A02G499500	689912517	689915860	+	B3	7	1832	492	5.75	55096.6	-	0.958788	Cluster6
TraesCS7B02G005600.1	7B	TraesCS7B02G005600	3094550	3094837	-	B3	1	288	95	6.81	10751.4	-	-	#N/A
TraesCS7B02G085000.1	7B	TraesCS7B02G085000	97182049	97186794	+	B3	7	981	233	9.93	26807.7	-	0.84135	Cluster6
TraesCS7B02G230100.1	7B	TraesCS7B02G230100	432501171	432503871	-	B3	7	1132	256	7.09	28365	-	0.568298	Cluster1
TraesCS7B02G260000.1	7B	TraesCS7B02G260000	480271048	480271335	-	B3	1	288	95	8.95	10782.6	-	1	Cluster2
TraesCS7B02G263300.1	7B	TraesCS7B02G263300	483868302	483868589	-	B3	1	288	95	8.6	10716.5	-	0.958246	Cluster6
TraesCS7B02G269500.1	7B	TraesCS7B02G269500	494220250	494220537	-	B3	1	288	95	8.98	10771.6	-	-	#N/A
TraesCS7B02G294500.1	7B	TraesCS7B02G294500	531604168	531608033	+	B3	6	1485	392	9.2	43710.8	-	0.843529	Cluster1
TraesCS7B02G324200.1	7B	TraesCS7B02G324200	577145300	577145587	-	B3	1	288	95	7.77	10761.6	-	-	#N/A
TraesCS7B02G347500.1	7B	TraesCS7B02G347500	603840059	603840346	+	B3	1	288	95	7.79	10759.6	-	-	#N/A
TraesCS7B02G362500.1	7B	TraesCS7B02G362500	624246336	624246926	+	B3	1	591	196	10.12	20786.7	-	0.999771	Cluster4
TraesCS7B02G364000.1	7B	TraesCS7B02G364000	626563421	626568051	-	B3	8	2304	628	6.15	71317.8	-	0.985535	Cluster2
TraesCS7B02G374600.1	7B	TraesCS7B02G374600	639856952	639857239	+	B3	1	288	95	7.79	10725.5	-	-	#N/A
TraesCS7B02G406400.1	7B	TraesCS7B02G406400	675187632	675190824	+	B3	7	1783	481	5.55	53904.5	-	0.966168	Cluster6
TraesCS7B02G406500.1	7B	TraesCS7B02G406500	675211194	675214383	+	B3	7	1944	385	6.25	43369.9	-	0.852368	Cluster1
TraesCS7B02G410000.1	7B	TraesCS7B02G410000	679358641	679358928	+	B3	1	288	95	6.81	10857.6	-	-	#N/A
TraesCS7B02G467900.1	7B	TraesCS7B02G467900	725301631	725303894	+	B3	4	545	133	4.3	15290.3	-	-	#N/A
TraesCS7B02G488800.1	7B	TraesCS7B02G488800	743138475	743138762	-	B3	1	288	95	8.6	10728.6	-	-	#N/A
TraesCS7D02G017000.1	7D	TraesCS7D02G017000	7465460	7466113	-	B3	1	654	217	10.54	23473	-	0.999331	Cluster4
TraesCS7D02G020700.1	7D	TraesCS7D02G020700	9303950	9309014	-	B3	7	4350	1264	7.19	143294	-	0.625825	Cluster3
TraesCS7D02G022400.1	7D	TraesCS7D02G022400	10503784	10508656	+	B3	6	4350	1315	7.8	148702	-	0.760476	Cluster3
TraesCS7D02G027300.1	7D	TraesCS7D02G027300	13410104	13413220	-	B3	5	1150	254	7.1	27986.9	-	0.916984	Cluster1
TraesCS7D02G057400.1	7D	TraesCS7D02G057400	30842333	30845131	-	B3	7	986	232	9.71	26804.4	-	0.708271	Cluster1
TraesCS7D02G083000.1	7D	TraesCS7D02G083000	49825973	49828678	-	B3	6	1623	524	7.15	60387.1	-	1	Cluster1
TraesCS7D02G158800.1	7D	TraesCS7D02G158800	107721477	107721764	-	B3	1	288	95	8.6	10779.6	-	0.86573	Cluster5
TraesCS7D02G181300.1	7D	TraesCS7D02G181300	135348634	135350219	+	B3	6	702	233	9.9	26860.8	-	0.812965	Cluster6
TraesCS7D02G214200.1	7D	TraesCS7D02G214200	174132998	174133285	+	B3	1	288	95	9.17	10678.6	-	-	#N/A
TraesCS7D02G326300.1	7D	TraesCS7D02G326300	416629589	416632363	-	B3	7	1217	256	7.05	28355	-	0.628596	Cluster2
TraesCS7D02G339100.1	7D	TraesCS7D02G339100	433076926	433077213	+	B3	1	288	95	6.81	10853.7	-	0.780265	Cluster3
TraesCS7D02G361400.1	7D	TraesCS7D02G361400	463974541	463975071	-	B3	1	531	176	5.69	19753.6	-	0.985711	Cluster2
TraesCS7D02G366900.1	7D	TraesCS7D02G366900	474490157	474490444	-	B3	1	288	95	7.79	10691.5	-	0.969006	Cluster2
TraesCS7D02G388100.1	7D	TraesCS7D02G388100	501892301	501896399	+	B3	6	1535	388	9.44	43006.1	-	0.755714	Cluster1
TraesCS7D02G442000.1	7D	TraesCS7D02G442000	561523914	561524195	-	B3	1	282	93	6.81	10576.3	-	1	Cluster2
TraesCS7D02G447400.1	7D	TraesCS7D02G447400	568006211	568006498	-	B3	1	288	95	7.8	10594.2	-	0.778854	Cluster3
TraesCS7D02G448900.1	7D	TraesCS7D02G448900	568419806	568420396	+	B3	1	591	196	10.7	21051.9	-	1	Cluster4
TraesCS7D02G486300.1	7D	TraesCS7D02G486300	596699471	596702912	+	B3	7	2095	496	5.78	55587.4	-	0.916357	Cluster6
TraesCS7D02G525400.1	7D	TraesCS7D02G525400	621163324	621163611	+	B3	1	288	95	7.8	10718.5	-	0.965989	Cluster6
TraesCSU02G075300.1	Un	TraesCSU02G075300	67360690	67363490	-	B3	5	1333	235	6.28	27306.6	-	0.559017	Cluster1
TraesCSU02G231000.1	Un	TraesCSU02G231000	341537584	341541144	-	B3	2	1051	218	10.2	24219.8	-	0.882257	Cluster6
TraesCSU02G254800.1	Un	TraesCSU02G254800	393374347	393375033	-	B3	3	492	163	8.75	17830.8	-	0.926774	Cluster2
TraesCS1A02G156600.1	1A	TraesCS1A02G156600	278141903	278145724	+	B3-ARF	3	2067	688	7.59	74442	PO:0020131:lateral root cap, PO:0020130:central root cap	0.440892	Cluster2
TraesCS1A02G334900.1	1A	TraesCS1A02G334900	522229516	522235237	+	B3-ARF	10	2852	707	6.71	75723.6	PO:0000229:flower meristem, PO:0000017:vascular leaf primordium, PO:0020144:apical meristem, PO:0007130:sporophyte reproductive stage	0.667609	Cluster1
TraesCS1A02G396400.1	1A	TraesCS1A02G396400	562316367	562321517	+	B3-ARF	11	2775	735	7.38	80391	PO:0000229:flower meristem, PO:0000017:vascular leaf primordium, PO:0020144:apical meristem	0.643809	Cluster1
TraesCS1B02G173700.1	1B	TraesCS1B02G173700	310926364	310931299	+	B3-ARF	4	2992	691	7.6	74729.3	PO:0020131:lateral root cap, PO:0020130:central root cap	0.583939	Cluster1
TraesCS1B02G347900.1	1B	TraesCS1B02G347900	577605524	577612236	+	B3-ARF	9	2310	664	9.18	71840	PO:0000229:flower meristem, PO:0000017:vascular leaf primordium, PO:0020144:apical meristem, PO:0007130:sporophyte reproductive stage	0.729487	Cluster1
TraesCS1B02G424700.1	1B	TraesCS1B02G424700	649049858	649055625	+	B3-ARF	11	2898	742	6.97	81014.7	PO:0000229:flower meristem, PO:0000017:vascular leaf primordium, PO:0020144:apical meristem	0.664001	Cluster1
TraesCS1D02G155100.1	1D	TraesCS1D02G155100	217142447	217147277	+	B3-ARF	4	2906	688	7.59	74323.8	PO:0020131:lateral root cap, PO:0020130:central root cap	0.542035	Cluster1
TraesCS1D02G337400.1	1D	TraesCS1D02G337400	427148433	427153780	+	B3-ARF	10	2740	698	6.46	75056.9	PO:0000229:flower meristem, PO:0000017:vascular leaf primordium, PO:0020144:apical meristem, PO:0007130:sporophyte reproductive stage	0.710037	Cluster1
TraesCS1D02G404400.1	1D	TraesCS1D02G404400	469215517	469220694	+	B3-ARF	11	3006	735	7.16	80358	PO:0000229:flower meristem, PO:0000017:vascular leaf primordium, PO:0020144:apical meristem	0.672699	Cluster1
TraesCS2A02G309300.1	2A	TraesCS2A02G309300	532491310	532496731	-	B3-ARF	14	2777	654	5.84	72518.7	-	0.39602	Cluster3
TraesCS2A02G491000.1	2A	TraesCS2A02G491000	724296566	724302700	+	B3-ARF	14	3458	955	5.74	105517	-	0.887235	Cluster1
TraesCS2A02G547800.1	2A	TraesCS2A02G547800	755768802	755776624	+	B3-ARF	16	3275	831	5.97	92548.4	PO:0020102:portion of transmitting tissue, PO:0000018:ovule primordium	0.777774	Cluster6
TraesCS2A02G567300.1	2A	TraesCS2A02G567300	766151730	766156639	+	B3-ARF	2	1935	515	5.68	55849.1	-	0.939988	Cluster6
TraesCS2B02G326400.1	2B	TraesCS2B02G326400	466189430	466195033	-	B3-ARF	14	3038	654	5.77	72581.7	-	0.460178	Cluster3
TraesCS2B02G397300.1	2B	TraesCS2B02G397300	563921112	563924301	-	B3-ARF	3	2959	708	6.37	76213.7	-	0.644073	Cluster5
TraesCS2B02G519200.1	2B	TraesCS2B02G519200	714127549	714133648	+	B3-ARF	14	3727	954	5.81	105296	-	0.877505	Cluster1
TraesCS2B02G578500.1	2B	TraesCS2B02G578500	766557473	766568984	+	B3-ARF	16	3113	833	5.88	92703.6	PO:0020102:portion of transmitting tissue, PO:0000018:ovule primordium	0.872391	Cluster6
TraesCS2D02G307600.1	2D	TraesCS2D02G307600	394536026	394541495	-	B3-ARF	14	2919	654	5.7	72521.7	-	0.369802	Cluster3
TraesCS2D02G376600.1	2D	TraesCS2D02G376600	480775965	480778720	-	B3-ARF	3	2503	714	6.25	76416	-	0.575676	Cluster1
TraesCS2D02G491200.1	2D	TraesCS2D02G491200	589972466	589978865	+	B3-ARF	14	3767	954	5.83	105310	-	0.891372	Cluster1
TraesCS2D02G548900.1	2D	TraesCS2D02G548900	624361690	624369366	+	B3-ARF	17	3079	833	5.88	92632.5	PO:0020102:portion of transmitting tissue, PO:0000018:ovule primordium	0.840246	Cluster6
TraesCS2D02G577800.1	2D	TraesCS2D02G577800	640997628	641003955	+	B3-ARF	3	2408	513	5.42	55343.5	-	0.957864	Cluster6
TraesCS3A02G159200.1	3A	TraesCS3A02G159200	158467595	158471848	+	B3-ARF	14	2716	759	6.07	83727.4	-	0.761669	Cluster2
TraesCS3A02G246000.1	3A	TraesCS3A02G246000	461786114	461792083	+	B3-ARF	11	2703	666	6.76	73516.8	PO:0000229:flower meristem, PO:0000017:vascular leaf primordium, PO:0020144:apical meristem	0.542571	Cluster1
TraesCS3A02G292400.1	3A	TraesCS3A02G292400	522271068	522277462	-	B3-ARF	10	2744	653	8.31	70308.7	PO:0000229:flower meristem, PO:0000017:vascular leaf primordium, PO:0020144:apical meristem, PO:0007130:sporophyte reproductive stage	0.331862	Cluster1
TraesCS3A02G442000.1	3A	TraesCS3A02G442000	684040773	684045606	+	B3-ARF	15	3008	797	6.05	89229.9	PO:0020149:quiescent center, PO:0020133:columella root cap initial cell, PO:0006203:pericycle, PO:0009015:portion of vascular tissue	0.422783	Cluster3
TraesCS3A02G449300.1	3A	TraesCS3A02G449300	688688783	688693421	-	B3-ARF	14	2865	778	6.09	87222.4	PO:0020149:quiescent center, PO:0020133:columella root cap initial cell, PO:0006203:pericycle, PO:0009015:portion of vascular tissue	0.463416	Cluster3
TraesCS3B02G190100.1	3B	TraesCS3B02G190100	202574346	202578692	+	B3-ARF	14	2710	758	6.15	83510.2	-	0.807473	Cluster1
TraesCS3B02G273400.1	3B	TraesCS3B02G273400	440405289	440409577	-	B3-ARF	6	1652	429	6.6	47223.1	PO:0000229:flower meristem, PO:0000017:vascular leaf primordium, PO:0020144:apical meristem	0.532076	Cluster1
TraesCS3B02G327000.1	3B	TraesCS3B02G327000	527654119	527661465	-	B3-ARF	11	2588	660	8.46	71267.8	PO:0000229:flower meristem, PO:0000017:vascular leaf primordium, PO:0020144:apical meristem, PO:0007130:sporophyte reproductive stage	0.337578	Cluster3
TraesCS3B02G475800.1	3B	TraesCS3B02G475800	724737433	724742425	+	B3-ARF	15	3164	796	6.05	89098.7	PO:0020149:quiescent center, PO:0020133:columella root cap initial cell, PO:0006203:pericycle, PO:0009015:portion of vascular tissue	0.424785	Cluster3
TraesCS3B02G486000.1	3B	TraesCS3B02G486000	732614396	732619521	-	B3-ARF	15	3165	824	5.9	92031.1	PO:0020149:quiescent center, PO:0020133:columella root cap initial cell, PO:0006203:pericycle, PO:0009015:portion of vascular tissue	0.278366	Cluster3
TraesCS3D02G166700.1	3D	TraesCS3D02G166700	140766103	140770322	+	B3-ARF	14	2672	758	6.07	83574.3	-	0.72952	Cluster2
TraesCS3D02G245400.1	3D	TraesCS3D02G245400	341501433	341512542	-	B3-ARF	12	2476	710	6.48	77913.4	PO:0000229:flower meristem, PO:0000017:vascular leaf primordium, PO:0020144:apical meristem	0.781032	Cluster1
TraesCS3D02G292100.1	3D	TraesCS3D02G292100	401893668	401899417	-	B3-ARF	11	2375	693	8.7	74303.2	PO:0000229:flower meristem, PO:0000017:vascular leaf primordium, PO:0020144:apical meristem, PO:0007130:sporophyte reproductive stage	0.323443	Cluster3
TraesCS3D02G434700.1	3D	TraesCS3D02G434700	547298032	547302973	+	B3-ARF	15	3118	796	6.05	89043.6	PO:0020149:quiescent center, PO:0020133:columella root cap initial cell, PO:0006203:pericycle, PO:0009015:portion of vascular tissue	0.42179	Cluster3
TraesCS3D02G442000.1	3D	TraesCS3D02G442000	551998411	552003298	-	B3-ARF	15	2948	840	6.12	93666	PO:0020149:quiescent center, PO:0020133:columella root cap initial cell, PO:0006203:pericycle, PO:0009015:portion of vascular tissue	0.339971	Cluster3
TraesCS5A02G038300.1	5A	TraesCS5A02G038300	35626865	35633118	+	B3-ARF	14	3984	891	5.81	98346.9	-	0.519794	Cluster6
TraesCS5B02G039800.1	5B	TraesCS5B02G039800	44776428	44782874	+	B3-ARF	15	4054	891	5.77	98340.9	-	0.50538	Cluster6
TraesCS5D02G045700.1	5D	TraesCS5D02G045700	44907236	44913663	+	B3-ARF	14	4092	892	5.74	98374.9	-	0.385068	Cluster6
TraesCS6A02G113000.1	6A	TraesCS6A02G113000	83250992	83258917	+	B3-ARF	14	4458	1135	5.93	126076	-	0.867367	Cluster6
TraesCS6A02G138600.1	6A	TraesCS6A02G138600	109983416	109988274	+	B3-ARF	14	2766	921	5.68	101612	-	0.612639	Cluster5
TraesCS6A02G222300.1	6A	TraesCS6A02G222300	415905558	415907673	-	B3-ARF	2	2019	672	7.62	72907.1	-	0.666795	Cluster5
TraesCS6B02G141300.1	6B	TraesCS6B02G141300	140597261	140603074	-	B3-ARF	12	3701	1049	6.06	117314	-	0.837722	Cluster6
TraesCS6B02G167100.1	6B	TraesCS6B02G167100	175337535	175345009	+	B3-ARF	15	3925	927	5.62	102436	-	0.643138	Cluster1
TraesCS6B02G258800.1	6B	TraesCS6B02G258800	466695618	466698313	+	B3-ARF	3	2477	747	8.65	80658.9	-	0.580986	Cluster3
TraesCS6D02G102300.1	6D	TraesCS6D02G102300	65497984	65505801	-	B3-ARF	14	4379	1129	5.93	125319	-	0.813672	Cluster6
TraesCS6D02G127600.1	6D	TraesCS6D02G127600	91516586	91522540	+	B3-ARF	14	3901	925	5.61	102310	-	0.714089	Cluster6
TraesCS6D02G212700.1	6D	TraesCS6D02G212700	301268010	301270782	+	B3-ARF	3	2572	769	8.65	83017.6	-	0.805007	Cluster2
TraesCS7A02G160800.1	7A	TraesCS7A02G160800	116871592	116878338	+	B3-ARF	13	4111	1066	5.95	118562	PO:0009015:portion of vascular tissue	0.575725	Cluster5
TraesCS7A02G252000.1	7A	TraesCS7A02G252000	236611658	236620693	+	B3-ARF	14	4017	1059	6.32	117600	-	0.462079	Cluster3
TraesCS7A02G416400.1	7A	TraesCS7A02G416400	608398282	608407279	-	B3-ARF	14	4498	1173	6.11	130604	-	0.593953	Cluster3
TraesCS7A02G446900.1	7A	TraesCS7A02G446900	641577992	641581799	-	B3-ARF	4	2834	701	8.15	75792	-	0.485633	Cluster4
TraesCS7A02G461700.1	7A	TraesCS7A02G461700	657715805	657722562	-	B3-ARF	14	4379	909	5.88	100313	-	0.431983	Cluster5
TraesCS7A02G475600.1	7A	TraesCS7A02G475600	670578996	670580194	-	B3-ARF	2	1125	374	6.56	40693.2	-	0.879922	Cluster1
TraesCS7A02G475700.1	7A	TraesCS7A02G475700	670732714	670734217	-	B3-ARF	2	1421	371	6.56	40377.8	-	0.872781	Cluster1
TraesCS7B02G065800.1	7B	TraesCS7B02G065800	71361132	71368111	+	B3-ARF	13	4318	1065	6.05	118480	PO:0009015:portion of vascular tissue	0.458681	Cluster5
TraesCS7B02G138900.1	7B	TraesCS7B02G138900	174568114	174573448	-	B3-ARF	13	3201	945	6.54	105830	-	0.438697	Cluster3
TraesCS7B02G316600.1	7B	TraesCS7B02G316600	565908841	565917820	-	B3-ARF	14	4476	1174	6.22	130822	-	0.574155	Cluster3
TraesCS7B02G346700.1	7B	TraesCS7B02G346700	602937797	602941577	+	B3-ARF	4	2865	694	7.91	75181.4	-	0.393754	Cluster5
TraesCS7B02G363100.1	7B	TraesCS7B02G363100	625296433	625302193	-	B3-ARF	14	3459	909	5.93	100158	-	0.333033	Cluster5
TraesCS7D02G161900.1	7D	TraesCS7D02G161900	112045748	112052551	+	B3-ARF	13	4156	1065	6	118374	PO:0009015:portion of vascular tissue	0.553405	Cluster5
TraesCS7D02G250100.1	7D	TraesCS7D02G250100	222138468	222145370	+	B3-ARF	14	3958	1064	6.27	118249	-	0.50402	Cluster3
TraesCS7D02G409700.1	7D	TraesCS7D02G409700	528133883	528142887	-	B3-ARF	14	4447	1175	6.16	130932	-	0.525882	Cluster3
TraesCS7D02G436800.1	7D	TraesCS7D02G436800	556120190	556124226	+	B3-ARF	4	3058	695	8.13	75250.6	-	0.409656	Cluster5
TraesCS7D02G449900.1	7D	TraesCS7D02G449900	568949472	568952883	-	B3-ARF	9	2181	726	6.06	80018.8	-	0.458537	Cluster5
TraesCS7D02G463000.1	7D	TraesCS7D02G463000	578177553	578179101	-	B3-ARF	2	1399	354	7.19	38829.7	-	0.643202	Cluster2
TraesCS2A02G187800.1	2A	TraesCS2A02G187800	150123158	150124982	-	BES1	2	1680	313	8.26	33681.7	-	0.534092	Cluster6
TraesCS2B02G219300.1	2B	TraesCS2B02G219300	209436541	209438293	+	BES1	2	1621	313	8.26	33612.6	-	0.570384	Cluster6
TraesCS2D02G199900.1	2D	TraesCS2D02G199900	151325675	151327278	+	BES1	2	1458	313	8.26	33629.6	-	0.556932	Cluster6
TraesCS3A02G123500.1	3A	TraesCS3A02G123500	99587987	99588641	+	BES1	2	558	185	9.26	19968.4	-	0.886252	Cluster6
TraesCS3A02G139000.1	3A	TraesCS3A02G139000	116518694	116521474	+	BES1	2	1612	356	8.82	37410.7	-	0.365765	Cluster5
TraesCS3B02G142600.1	3B	TraesCS3B02G142600	130257382	130258484	+	BES1	2	1018	182	9.18	19755.1	-	0.987061	Cluster6
TraesCS3B02G156600.1	3B	TraesCS3B02G156600	149453513	149456182	+	BES1	2	1563	354	8.82	37282.6	-	0.410646	Cluster6
TraesCS3D02G125100.1	3D	TraesCS3D02G125100	83703140	83706035	+	BES1	2	2811	178	9.4	19267.5	-	0.928752	Cluster1
TraesCS3D02G139300.1	3D	TraesCS3D02G139300	98871655	98874852	+	BES1	2	2167	358	8.82	37510.8	-	0.378454	Cluster5
TraesCS4B02G009900.1	4B	TraesCS4B02G009900	6145862	6150103	+	BES1	8	1656	551	5.4	62340.8	-	0.348851	Cluster3
TraesCS4D02G006100.1	4D	TraesCS4D02G006100	3396041	3400090	-	BES1	9	2061	686	5.42	75473.9	-	0.362772	Cluster3
TraesCS6A02G085800.1	6A	TraesCS6A02G085800	54114528	54120325	-	BES1	10	2553	559	5.3	62452.3	-	0.496668	Cluster1
TraesCS6A02G338000.1	6A	TraesCS6A02G338000	571795464	571798512	+	BES1	2	1303	347	8.79	36419.2	-	0.948036	Cluster2
TraesCS6B02G116400.1	6B	TraesCS6B02G116400	101917058	101922110	+	BES1	9	2008	644	6.27	72177.4	-	0.491165	Cluster1
TraesCS6B02G368700.1	6B	TraesCS6B02G368700	642915733	642918687	+	BES1	2	1109	356	8.97	37717.6	-	0.931521	Cluster2
TraesCS6D02G318800.1	6D	TraesCS6D02G318800	427088164	427091592	+	BES1	2	1385	348	8.62	36446.3	-	0.869188	Cluster5
TraesCS7A02G354800.1	7A	TraesCS7A02G354800	519130893	519134316	+	BES1	2	1830	359	8.13	37849.7	-	0.640597	Cluster1
TraesCS7B02G272900.1	7B	TraesCS7B02G272900	500729832	500732996	-	BES1	2	1833	359	8.13	37862.8	-	0.567865	Cluster1
TraesCS7D02G368000.1	7D	TraesCS7D02G368000	476686048	476690149	-	BES1	2	2083	359	8.13	37808.7	-	0.47414	Cluster1
TraesCSU02G078100.1	Un	TraesCSU02G078100	70282885	70289907	+	BES1	9	2023	644	6.18	72054.3	-	0.490622	Cluster1
TraesCS1A02G079300.1	1A	TraesCS1A02G079300	62014082	62014939	+	bHLH	2	749	229	10.99	24371.8	-	0.893659	Cluster6
TraesCS1A02G083000.1	1A	TraesCS1A02G083000	66174940	66177799	+	bHLH	5	2412	507	6.31	54413.5	-	0.65405	Cluster6
TraesCS1A02G102400.1	1A	TraesCS1A02G102400	98584808	98591722	+	bHLH	9	2026	624	5.65	68334.5	TO:0000487:endosperm color	0.871325	Cluster2
TraesCS1A02G110400.1	1A	TraesCS1A02G110400	110072873	110073869	+	bHLH	2	768	212	9.16	22962.4	-	0.920587	Cluster2
TraesCS1A02G193200.1	1A	TraesCS1A02G193200	349358465	349360851	+	bHLH	2	2082	693	-	-	PO:0000017:vascular leaf primordium, PO:0009037:lemma, PO:0000034:vascular system	0.603264	Cluster5
TraesCS1A02G212700.1	1A	TraesCS1A02G212700	375471252	375477408	-	bHLH	5	1941	455	5.88	48421.7	-	0.750317	Cluster5
TraesCS1A02G281300.1	1A	TraesCS1A02G281300	479817767	479820086	+	bHLH	5	1415	240	6.92	26067.5	-	0.436365	Cluster5
TraesCS1A02G290800.1	1A	TraesCS1A02G290800	487100407	487103583	-	bHLH	3	1783	420	5.19	45270.2	PO:0000351:guard mother cell	0.719097	Cluster5
TraesCS1A02G345200.1	1A	TraesCS1A02G345200	532672290	532673440	+	bHLH	5	705	186	5.44	20855.3	-	1	Cluster1
TraesCS1A02G369200.1	1A	TraesCS1A02G369200	547004383	547004979	+	bHLH	1	597	198	6.96	21857.8	-	1	Cluster6
TraesCS1B02G097000.1	1B	TraesCS1B02G097000	101232804	101233918	-	bHLH	2	986	188	10.17	19627.4	-	0.870912	Cluster6
TraesCS1B02G100400.1	1B	TraesCS1B02G100400	109210867	109213456	+	bHLH	4	2221	390	6.53	42137.9	-	0.762559	Cluster2
TraesCS1B02G112900.1	1B	TraesCS1B02G112900	131456949	131464291	+	bHLH	7	1896	631	5.84	69225.7	TO:0000487:endosperm color	0.969646	Cluster2
TraesCS1B02G113100.1	1B	TraesCS1B02G113100	131775571	131785272	+	bHLH	9	2236	522	5.59	57613	TO:0000487:endosperm color	0.949966	Cluster2
TraesCS1B02G129200.1	1B	TraesCS1B02G129200	159203247	159204267	-	bHLH	2	795	212	9.32	23062.5	-	0.937184	Cluster2
TraesCS1B02G208000.1	1B	TraesCS1B02G208000	376071131	376073212	+	bHLH	1	2082	693	6.15	75089.9	PO:0000017:vascular leaf primordium, PO:0009037:lemma, PO:0000034:vascular system	0.612271	Cluster5
TraesCS1B02G226200.1	1B	TraesCS1B02G226200	406039945	406050091	-	bHLH	5	1678	454	6.61	48370.6	-	0.726784	Cluster5
TraesCS1B02G290500.1	1B	TraesCS1B02G290500	507807038	507809304	+	bHLH	5	1389	242	7.71	26177.6	-	0.409736	Cluster5
TraesCS1B02G300100.1	1B	TraesCS1B02G300100	520812651	520815823	-	bHLH	4	1638	417	5.13	44967.9	PO:0000351:guard mother cell	0.653019	Cluster5
TraesCS1B02G359000.1	1B	TraesCS1B02G359000	588448000	588449096	+	bHLH	5	763	186	5.58	20910.5	-	1	Cluster1
TraesCS1D02G081000.1	1D	TraesCS1D02G081000	63380339	63381549	-	bHLH	2	1082	224	11.12	23704.2	-	0.888076	Cluster6
TraesCS1D02G084200.1	1D	TraesCS1D02G084200	67861248	67863855	+	bHLH	5	2174	502	6.37	53885	-	0.760721	Cluster2
TraesCS1D02G094200.1	1D	TraesCS1D02G094200	79937738	79944977	+	bHLH	9	1896	631	6.28	69690.1	TO:0000487:endosperm color	0.938492	Cluster2
TraesCS1D02G112000.1	1D	TraesCS1D02G112000	107502169	107503378	+	bHLH	3	913	211	8.85	22873.2	-	0.954101	Cluster6
TraesCS1D02G196900.1	1D	TraesCS1D02G196900	277092891	277094978	+	bHLH	1	2088	695	6.15	75347.2	PO:0000017:vascular leaf primordium, PO:0009037:lemma, PO:0000034:vascular system	0.598419	Cluster5
TraesCS1D02G215600.1	1D	TraesCS1D02G215600	300862171	300870830	-	bHLH	5	1855	454	5.87	48184.4	-	0.738316	Cluster5
TraesCS1D02G280600.1	1D	TraesCS1D02G280600	379130650	379132979	+	bHLH	5	1436	241	6.92	26113.5	-	0.417617	Cluster5
TraesCS1D02G289400.1	1D	TraesCS1D02G289400	387431154	387434349	-	bHLH	4	1529	419	5.09	45079.1	PO:0000351:guard mother cell	0.677019	Cluster5
TraesCS1D02G347900.1	1D	TraesCS1D02G347900	435050178	435051132	+	bHLH	5	603	186	5.42	20909.6	-	-	#N/A
TraesCS1D02G374800.1	1D	TraesCS1D02G374800	452207853	452208650	+	bHLH	1	798	265	5.89	28815.4	-	0.972561	Cluster6
TraesCS2A02G120700.1	2A	TraesCS2A02G120700	70706123	70707180	+	bHLH	2	936	216	7.03	23168.6	PO:0000351:guard mother cell, PO:0004011:initial cell	0.984561	Cluster6
TraesCS2A02G194200.1	2A	TraesCS2A02G194200	162291365	162292945	+	bHLH	5	1178	302	4.81	33030.5	-	1	Cluster6
TraesCS2A02G212200.1	2A	TraesCS2A02G212200	197088104	197089901	-	bHLH	4	1021	224	5.29	24774.1	PO:0000229:flower meristem, PO:0000009:cultured plant callus, PO:0009051:spikelet	0.970241	Cluster6
TraesCS2A02G215600.1	2A	TraesCS2A02G215600	202872528	202877444	+	bHLH	5	1224	251	6.14	27528.3	-	0.196184	Cluster1
TraesCS2A02G253900.1	2A	TraesCS2A02G253900	386293140	386297109	-	bHLH	9	2235	347	6.05	36857.3	-	0.554263	Cluster3
TraesCS2A02G271700.1	2A	TraesCS2A02G271700	444623265	444626004	-	bHLH	5	1222	278	4.71	30333.2	-	0.826318	Cluster4
TraesCS2A02G275600.1	2A	TraesCS2A02G275600	454690233	454693571	+	bHLH	6	2016	406	6.02	42533.6	PO:0009037:lemma	0.76941	Cluster1
TraesCS2A02G281200.1	2A	TraesCS2A02G281200	469810800	469812561	-	bHLH	3	1333	338	5.43	36457.7	-	0.780912	Cluster2
TraesCS2A02G409400.1	2A	TraesCS2A02G409400	667010726	667015774	+	bHLH	9	1928	568	5.37	62651.2	TO:0000487:endosperm color	0.937582	Cluster6
TraesCS2A02G409600.1	2A	TraesCS2A02G409600	667647089	667651764	+	bHLH	6	1114	357	4.68	38840.8	TO:0000487:endosperm color	0.978242	Cluster6
TraesCS2A02G442500.1	2A	TraesCS2A02G442500	692707285	692709299	+	bHLH	4	928	248	5.73	28073.9	-	0.967302	Cluster6
TraesCS2A02G442700.1	2A	TraesCS2A02G442700	692754161	692757947	+	bHLH	4	2715	467	5.17	51993.1	-	0.813355	Cluster1
TraesCS2A02G448500.1	2A	TraesCS2A02G448500	697375346	697376351	-	bHLH	1	1006	256	6.53	27936.6	-	0.888708	Cluster1
TraesCS2A02G448800.1	2A	TraesCS2A02G448800	698131694	698134949	-	bHLH	3	1605	331	6.2	35452.3	-	0.941433	Cluster6
TraesCS2A02G461700.1	2A	TraesCS2A02G461700	707567478	707569231	+	bHLH	6	986	186	9.1	21481.5	-	0.895455	Cluster1
TraesCS2A02G472300.1	2A	TraesCS2A02G472300	713935230	713936469	-	bHLH	2	1112	210	8.95	22776.7	-	0.972728	Cluster6
TraesCS2A02G515300.1	2A	TraesCS2A02G515300	739481077	739491052	-	bHLH	3	985	253	5.65	27634.3	-	1	Cluster1
TraesCS2A02G521500.1	2A	TraesCS2A02G521500	744408404	744409772	+	bHLH	2	1277	96	8	10411.7	-	0.958663	Cluster6
TraesCS2B02G141600.1	2B	TraesCS2B02G141600	107963253	107964346	+	bHLH	2	919	238	8.72	25647.3	PO:0000351:guard mother cell, PO:0004011:initial cell	0.990978	Cluster6
TraesCS2B02G212700.1	2B	TraesCS2B02G212700	197210852	197212507	-	bHLH	5	1254	302	4.8	33000.6	-	0.757437	Cluster3
TraesCS2B02G237300.1	2B	TraesCS2B02G237300	237980680	237982409	-	bHLH	4	1038	224	5.18	24818.1	PO:0000229:flower meristem, PO:0000009:cultured plant callus, PO:0009051:spikelet	0.954978	Cluster6
TraesCS2B02G240600.1	2B	TraesCS2B02G240600	244874628	244880767	+	bHLH	6	1172	251	6.45	27526.4	-	0.324635	Cluster3
TraesCS2B02G273500.1	2B	TraesCS2B02G273500	374801457	374803088	-	bHLH	7	1077	358	5.77	38314.9	-	0.627327	Cluster3
TraesCS2B02G289700.1	2B	TraesCS2B02G289700	401146115	401151436	-	bHLH	5	1000	268	5.02	29521.6	-	0.774173	Cluster7
TraesCS2B02G289900.1	2B	TraesCS2B02G289900	402217632	402220229	-	bHLH	4	1477	278	4.62	30440.3	-	0.815586	Cluster4
TraesCS2B02G293300.1	2B	TraesCS2B02G293300	408723999	408727259	+	bHLH	7	1921	419	6.08	43681.8	PO:0009037:lemma	0.851482	Cluster1
TraesCS2B02G298600.1	2B	TraesCS2B02G298600	418276647	418278407	-	bHLH	3	1331	343	5.43	37042.2	-	0.907052	Cluster4
TraesCS2B02G428000.1	2B	TraesCS2B02G428000	615352721	615356928	+	bHLH	8	1722	573	5.17	62766.9	TO:0000487:endosperm color	0.97248	Cluster6
TraesCS2B02G463800.1	2B	TraesCS2B02G463800	657790256	657793959	+	bHLH	4	2605	467	5.22	51923.1	-	0.856892	Cluster1
TraesCS2B02G469200.1	2B	TraesCS2B02G469200	665419775	665420545	-	bHLH	2	741	246	5.77	26740.1	-	0.972837	Cluster6
TraesCS2B02G469300.1	2B	TraesCS2B02G469300	665445930	665446772	-	bHLH	1	843	256	5.98	27710.2	-	0.972628	Cluster6
TraesCS2B02G469700.1	2B	TraesCS2B02G469700	666087004	666090528	-	bHLH	3	1781	327	5.56	35001.5	-	0.890406	Cluster1
TraesCS2B02G469800.1	2B	TraesCS2B02G469800	666093562	666096804	-	bHLH	3	1499	327	5.56	35001.5	-	0.894688	Cluster1
TraesCS2B02G483300.1	2B	TraesCS2B02G483300	680597402	680599030	+	bHLH	5	949	188	9.1	21717.8	-	0.870104	Cluster1
TraesCS2B02G494900.1	2B	TraesCS2B02G494900	691809625	691810897	-	bHLH	2	1148	211	8.83	22946.9	-	0.985477	Cluster6
TraesCS2B02G543700.1	2B	TraesCS2B02G543700	741212130	741218771	-	bHLH	4	735	244	7.58	26605.2	-	1	Cluster3
TraesCS2B02G543800.1	2B	TraesCS2B02G543800	741241670	741248415	-	bHLH	3	1019	250	5.89	27543.2	-	-	#N/A
TraesCS2B02G550800.1	2B	TraesCS2B02G550800	746680516	746680928	+	bHLH	2	291	96	8	10408.7	-	0.965619	Cluster6
TraesCS2B02G550900.1	2B	TraesCS2B02G550900	747077042	747078098	+	bHLH	2	948	96	8.02	10351.6	-	0.962931	Cluster6
TraesCS2D02G122800.1	2D	TraesCS2D02G122800	71682564	71683611	+	bHLH	2	928	215	7.03	23052.5	PO:0000351:guard mother cell, PO:0004011:initial cell	0.995295	Cluster6
TraesCS2D02G193700.1	2D	TraesCS2D02G193700	138754346	138756038	-	bHLH	5	1290	302	4.81	33020.5	-	1	Cluster4
TraesCS2D02G218100.1	2D	TraesCS2D02G218100	181322584	181324356	-	bHLH	4	1006	224	5.29	24821.1	PO:0000229:flower meristem, PO:0000009:cultured plant callus, PO:0009051:spikelet	0.980339	Cluster6
TraesCS2D02G221200.1	2D	TraesCS2D02G221200	188806437	188811408	+	bHLH	5	1236	251	6.14	27512.3	-	0.424076	Cluster1
TraesCS2D02G254400.1	2D	TraesCS2D02G254400	306528990	306532832	-	bHLH	9	2024	350	5.79	37461.9	-	0.596796	Cluster3
TraesCS2D02G270000.1	2D	TraesCS2D02G270000	333498463	333503015	-	bHLH	4	906	237	5.49	25764.3	-	0.718388	Cluster5
TraesCS2D02G270300.1	2D	TraesCS2D02G270300	334040936	334043454	-	bHLH	4	1434	278	4.63	30295.2	-	0.784299	Cluster4
TraesCS2D02G274600.1	2D	TraesCS2D02G274600	343555225	343558479	+	bHLH	6	1792	410	5.96	42955	PO:0009037:lemma	0.751203	Cluster1
TraesCS2D02G280100.1	2D	TraesCS2D02G280100	351981513	351983269	-	bHLH	3	1393	339	5.43	36688.8	-	0.859871	Cluster4
TraesCS2D02G406800.1	2D	TraesCS2D02G406800	522323994	522329757	+	bHLH	6	1398	465	4.96	51526.6	TO:0000487:endosperm color	-	#N/A
TraesCS2D02G406900.1	2D	TraesCS2D02G406900	522521462	522526938	+	bHLH	9	1924	567	5.19	61822.1	TO:0000487:endosperm color	0.959436	Cluster6
TraesCS2D02G441800.1	2D	TraesCS2D02G441800	552140055	552144018	+	bHLH	4	2875	467	5.23	51924.1	-	0.778758	Cluster1
TraesCS2D02G448000.1	2D	TraesCS2D02G448000	557792746	557795858	-	bHLH	3	1490	331	6.26	35377	-	0.912519	Cluster6
TraesCS2D02G461700.1	2D	TraesCS2D02G461700	568090900	568092632	+	bHLH	6	961	184	9.1	21196.2	-	0.849304	Cluster1
TraesCS2D02G461900.1	2D	TraesCS2D02G461900	568105983	568106958	+	bHLH	4	474	157	8.64	18407.2	-	0.922709	Cluster1
TraesCS2D02G472000.1	2D	TraesCS2D02G472000	575769827	575770610	-	bHLH	2	654	217	8.37	23620.7	-	0.994993	Cluster6
TraesCS2D02G517000.1	2D	TraesCS2D02G517000	607986836	607997092	-	bHLH	3	1061	253	6.22	27615.3	-	1	Cluster6
TraesCS2D02G523200.1	2D	TraesCS2D02G523200	612184495	612185807	+	bHLH	3	1032	96	6.73	10386.6	-	-	#N/A
TraesCS2D02G523300.1	2D	TraesCS2D02G523300	612325187	612326315	+	bHLH	2	1015	96	6.72	10298.5	-	0.973773	Cluster6
TraesCS2D02G575600.1	2D	TraesCS2D02G575600	639529397	639535242	-	bHLH	9	2005	573	5.25	63688.3	-	-	#N/A
TraesCS3A02G000400.1	3A	TraesCS3A02G000400	95678	97870	-	bHLH	2	1356	235	9.5	24389.7	-	0.816102	Cluster5
TraesCS3A02G000600.1	3A	TraesCS3A02G000600	177219	179017	-	bHLH	2	1016	217	9.72	23115.3	-	0.752221	Cluster5
TraesCS3A02G000700.1	3A	TraesCS3A02G000700	204727	208013	-	bHLH	4	972	223	9.42	24496.2	-	0.966223	Cluster6
TraesCS3A02G000800.1	3A	TraesCS3A02G000800	397801	400871	-	bHLH	3	1043	210	7.82	22877.8	-	0.991048	Cluster7
TraesCS3A02G006300.1	3A	TraesCS3A02G006300	7273333	7275112	-	bHLH	5	1297	274	5.65	29138.6	-	0.986421	Cluster4
TraesCS3A02G019000.1	3A	TraesCS3A02G019000	11675040	11677457	-	bHLH	3	1147	319	8.76	34577.2	PO:0004707:fruit dehiscence zone, PO:0006036:root epidermis, PO:0000051:petiole epidermis, PO:0009081:higher order inflorescence axis, PO:0006040:sepal epidermis, PO:0020128:leaf margin, PO:0009053:peduncle, PO:0006016:leaf epidermis, PO:0000112:shoot axis epidermis, PO:0006504:leaf trichome, PO:0000056:flower bud, PO:0000033:fruit valve, PO:0004006:mesophyll cell, PO:0000036:leaf vascular system	-	#N/A
TraesCS3A02G019100.1	3A	TraesCS3A02G019100	11703809	11704903	-	bHLH	2	957	318	9.49	34523.1	PO:0004707:fruit dehiscence zone, PO:0006036:root epidermis, PO:0000051:petiole epidermis, PO:0009081:higher order inflorescence axis, PO:0006040:sepal epidermis, PO:0020128:leaf margin, PO:0009053:peduncle, PO:0006016:leaf epidermis, PO:0000112:shoot axis epidermis, PO:0006504:leaf trichome, PO:0000056:flower bud, PO:0000033:fruit valve, PO:0004006:mesophyll cell, PO:0000036:leaf vascular system	-	#N/A
TraesCS3A02G028200.1	3A	TraesCS3A02G028200	15081435	15083181	+	bHLH	4	1247	247	4.98	26939.4	-	0.61794	Cluster3
TraesCS3A02G057900.1	3A	TraesCS3A02G057900	34050273	34051807	-	bHLH	3	1334	327	5.23	35145.8	-	0.943981	Cluster1
TraesCS3A02G058000.1	3A	TraesCS3A02G058000	34248315	34249499	-	bHLH	3	903	300	5.81	32008.3	-	0.964233	Cluster1
TraesCS3A02G102600.1	3A	TraesCS3A02G102600	66271251	66272970	-	bHLH	2	1389	334	9.03	36660.7	-	0.945489	Cluster2
TraesCS3A02G102900.1	3A	TraesCS3A02G102900	66362604	66364136	+	bHLH	3	1054	248	8.73	26699.2	-	0.9397	Cluster2
TraesCS3A02G104400.1	3A	TraesCS3A02G104400	67785276	67787946	-	bHLH	5	1759	441	5.78	47704.4	-	0.782905	Cluster3
TraesCS3A02G142900.1	3A	TraesCS3A02G142900	123284926	123289485	+	bHLH	2	2148	260	9.73	27131.7	-	0.718803	Cluster5
TraesCS3A02G158600.1	3A	TraesCS3A02G158600	156267711	156271635	-	bHLH	3	2419	616	6.52	67345.9	PO:0009062:gynoecium, PO:0000252:endodermis	0.301254	Cluster3
TraesCS3A02G204800.1	3A	TraesCS3A02G204800	359569747	359573814	-	bHLH	4	1759	394	5.49	42824.3	-	0.59029	Cluster3
TraesCS3A02G207300.1	3A	TraesCS3A02G207300	365250648	365252468	+	bHLH	2	1673	466	5.95	48330.4	-	0.865875	Cluster6
TraesCS3A02G252900.1	3A	TraesCS3A02G252900	474208686	474210610	-	bHLH	1	1925	459	8.43	49173.6	-	0.722328	Cluster5
TraesCS3A02G321800.1	3A	TraesCS3A02G321800	565459337	565461474	-	bHLH	3	1199	243	10.39	26448.1	-	0.97696	Cluster4
TraesCS3A02G350600.1	3A	TraesCS3A02G350600	599326045	599326683	+	bHLH	1	639	212	6.08	22938.8	-	1	Cluster6
TraesCS3A02G357000.1	3A	TraesCS3A02G357000	604998850	605001934	-	bHLH	7	931	247	7.05	28320.5	-	0.585475	Cluster1
TraesCS3A02G395000.1	3A	TraesCS3A02G395000	642208603	642212562	-	bHLH	6	1671	371	7.69	39483.9	-	0.456978	Cluster5
TraesCS3A02G421400.1	3A	TraesCS3A02G421400	662931519	662933524	+	bHLH	9	1314	437	6.4	46090.6	PO:0020094:plant egg cell	0.652427	Cluster2
TraesCS3A02G440600.1	3A	TraesCS3A02G440600	683239399	683241535	+	bHLH	5	765	254	5.28	28202.5	-	0.932837	Cluster7
TraesCS3A02G442200.1	3A	TraesCS3A02G442200	684289775	684293025	-	bHLH	4	1627	383	5.04	39647.8	-	0.788563	Cluster2
TraesCS3A02G442600.1	3A	TraesCS3A02G442600	684520208	684522407	-	bHLH	4	1132	292	9.03	31446	-	0.807308	Cluster5
TraesCS3A02G489400.1	3A	TraesCS3A02G489400	716946120	716948385	-	bHLH	3	1079	232	6.66	25778	-	0.828965	Cluster3
TraesCS3A02G489500.1	3A	TraesCS3A02G489500	716963827	716967042	-	bHLH	3	1071	238	8.32	26577.9	-	0.991132	Cluster6
TraesCS3A02G489600.1	3A	TraesCS3A02G489600	717006915	717011250	-	bHLH	3	1096	245	7.18	27258.8	-	0.971887	Cluster7
TraesCS3A02G489700.1	3A	TraesCS3A02G489700	717296946	717300622	+	bHLH	3	1364	247	7.24	27365.1	-	0.913387	Cluster5
TraesCS3B02G002200.1	3B	TraesCS3B02G002200	2101991	2104344	-	bHLH	2	1385	238	9.45	24797.9	-	0.900105	Cluster4
TraesCS3B02G002300.1	3B	TraesCS3B02G002300	2115065	2116840	-	bHLH	2	1303	216	9.62	23226.4	-	0.867424	Cluster5
TraesCS3B02G002400.1	3B	TraesCS3B02G002400	2128376	2130539	-	bHLH	3	645	214	9.51	23639	-	0.966285	Cluster6
TraesCS3B02G002500.1	3B	TraesCS3B02G002500	2143432	2146356	-	bHLH	4	949	221	9.62	23874.7	-	-	#N/A
TraesCS3B02G002600.1	3B	TraesCS3B02G002600	2160595	2163424	-	bHLH	3	691	209	9.51	22850.9	-	0.979051	Cluster6
TraesCS3B02G002700.1	3B	TraesCS3B02G002700	2169304	2172368	-	bHLH	3	990	210	9.17	22999.1	-	0.95851	Cluster7
TraesCS3B02G002900.1	3B	TraesCS3B02G002900	2255165	2257560	-	bHLH	4	890	212	9.71	23004.6	-	0.896466	Cluster5
TraesCS3B02G003000.1	3B	TraesCS3B02G003000	2265612	2268203	-	bHLH	4	516	171	9.77	18382.3	-	0.87998	Cluster5
TraesCS3B02G003200.1	3B	TraesCS3B02G003200	2296534	2299603	+	bHLH	3	978	208	8.29	23013.1	-	0.954352	Cluster7
TraesCS3B02G003300.1	3B	TraesCS3B02G003300	2308380	2311241	+	bHLH	3	912	210	6.6	23148	-	1	Cluster7
TraesCS3B02G003400.1	3B	TraesCS3B02G003400	2322937	2325102	+	bHLH	3	645	214	9.51	23639	-	0.976777	Cluster6
TraesCS3B02G003500.1	3B	TraesCS3B02G003500	2335984	2338269	+	bHLH	2	1311	225	9.65	23895.1	-	0.854548	Cluster5
TraesCS3B02G003700.1	3B	TraesCS3B02G003700	2396638	2398142	+	bHLH	2	1194	223	9.82	23821	-	0.882067	Cluster5
TraesCS3B02G007700.1	3B	TraesCS3B02G007700	3898802	3900540	+	bHLH	5	1273	274	5.77	29130.5	-	0.766464	Cluster1
TraesCS3B02G010400.1	3B	TraesCS3B02G010400	4785726	4787542	+	bHLH	5	1351	274	5.59	29134.4	-	0.827235	Cluster1
TraesCS3B02G018400.1	3B	TraesCS3B02G018400	7603365	7606088	+	bHLH	5	798	265	4.8	28925.6	-	0.616992	Cluster3
TraesCS3B02G029800.1	3B	TraesCS3B02G029800	13731936	13734151	+	bHLH	3	987	328	6.72	35717.1	PO:0004707:fruit dehiscence zone, PO:0006036:root epidermis, PO:0000051:petiole epidermis, PO:0009081:higher order inflorescence axis, PO:0006040:sepal epidermis, PO:0020128:leaf margin, PO:0009053:peduncle, PO:0006016:leaf epidermis, PO:0000112:shoot axis epidermis, PO:0006504:leaf trichome, PO:0000056:flower bud, PO:0000033:fruit valve, PO:0004006:mesophyll cell, PO:0000036:leaf vascular system	-	#N/A
TraesCS3B02G070400.1	3B	TraesCS3B02G070400	42368753	42369970	-	bHLH	3	918	305	5.28	32813.1	-	0.991858	Cluster1
TraesCS3B02G120200.1	3B	TraesCS3B02G120200	90156604	90159677	-	bHLH	2	2725	257	8.56	27692.5	-	0.883744	Cluster5
TraesCS3B02G120500.1	3B	TraesCS3B02G120500	90208771	90210280	+	bHLH	3	1067	258	8.78	27528.3	-	0.921669	Cluster2
TraesCS3B02G122800.1	3B	TraesCS3B02G122800	93891045	93893696	-	bHLH	5	1682	440	5.98	47312.9	-	0.800104	Cluster3
TraesCS3B02G122900.1	3B	TraesCS3B02G122900	94490730	94493370	-	bHLH	5	1685	440	6.74	47528.4	-	0.850942	Cluster5
TraesCS3B02G185400.1	3B	TraesCS3B02G185400	201338965	201341963	-	bHLH	2	2506	625	7.11	68238	PO:0009062:gynoecium, PO:0000252:endodermis	0.263791	Cluster2
TraesCS3B02G233700.1	3B	TraesCS3B02G233700	362053653	362055553	-	bHLH	2	1749	468	6.48	48990.2	-	0.940569	Cluster6
TraesCS3B02G236900.1	3B	TraesCS3B02G236900	370728097	370732105	-	bHLH	4	2028	392	5.5	42688.1	-	0.611198	Cluster3
TraesCS3B02G284800.1	3B	TraesCS3B02G284800	456322043	456325429	-	bHLH	1	3387	475	7.77	50759.5	-	0.800835	Cluster5
TraesCS3B02G288700.1	3B	TraesCS3B02G288700	463203205	463204586	+	bHLH	2	1332	443	8.47	47531.5	-	0.843392	Cluster6
TraesCS3B02G344000.1	3B	TraesCS3B02G344000	553096995	553098462	-	bHLH	3	1191	279	8.79	30613.7	-	0.980601	Cluster4
TraesCS3B02G383000.1	3B	TraesCS3B02G383000	602781952	602782590	-	bHLH	1	639	212	5.92	22883.6	-	1	Cluster1
TraesCS3B02G426900.1	3B	TraesCS3B02G426900	665340865	665344713	-	bHLH	6	1616	371	7.21	39340.8	-	0.641616	Cluster5
TraesCS3B02G457400.1	3B	TraesCS3B02G457400	699102383	699106075	-	bHLH	8	2939	474	5.91	49732.4	PO:0020094:plant egg cell	0.417303	Cluster3
TraesCS3B02G474700.1	3B	TraesCS3B02G474700	723499786	723501369	+	bHLH	5	765	254	5.62	28140.5	-	0.972585	Cluster7
TraesCS3B02G476000.1	3B	TraesCS3B02G476000	724926061	724929150	-	bHLH	4	1588	379	5.04	39422.7	-	0.703244	Cluster2
TraesCS3B02G549700.1	3B	TraesCS3B02G549700	784869840	784870603	-	bHLH	2	630	209	6.62	23161.2	-	0.975472	Cluster3
TraesCS3B02G549800.1	3B	TraesCS3B02G549800	784897999	784900983	-	bHLH	3	1170	238	8.33	26691	-	0.955095	Cluster5
TraesCS3B02G550000.1	3B	TraesCS3B02G550000	785039358	785043172	-	bHLH	3	738	245	6.83	27281	-	-	#N/A
TraesCS3B02G550200.1	3B	TraesCS3B02G550200	785280464	785281513	+	bHLH	2	943	222	7.17	24306.6	-	0.912966	Cluster5
TraesCS3D02G004300.1	3D	TraesCS3D02G004300	1748596	1750441	+	bHLH	5	1357	275	5.77	29113.6	-	0.878059	Cluster5
TraesCS3D02G008900.1	3D	TraesCS3D02G008900	3040757	3042971	-	bHLH	2	1217	225	9.71	23919.1	-	0.909702	Cluster6
TraesCS3D02G009200.1	3D	TraesCS3D02G009200	3087876	3089485	-	bHLH	2	948	219	9.72	23279.5	-	0.926534	Cluster6
TraesCS3D02G009300.1	3D	TraesCS3D02G009300	3096999	3099806	-	bHLH	4	760	222	9.51	24088.7	-	0.994054	Cluster7
TraesCS3D02G009400.1	3D	TraesCS3D02G009400	3196435	3199383	-	bHLH	3	1160	210	9.12	22923.9	-	-	#N/A
TraesCS3D02G009500.1	3D	TraesCS3D02G009500	3222057	3224575	-	bHLH	3	925	210	8.57	22729.6	-	0.975865	Cluster7
TraesCS3D02G014900.1	3D	TraesCS3D02G014900	5173752	5176386	-	bHLH	3	1393	336	6.8	36551.2	PO:0004707:fruit dehiscence zone, PO:0006036:root epidermis, PO:0000051:petiole epidermis, PO:0009081:higher order inflorescence axis, PO:0006040:sepal epidermis, PO:0020128:leaf margin, PO:0009053:peduncle, PO:0006016:leaf epidermis, PO:0000112:shoot axis epidermis, PO:0006504:leaf trichome, PO:0000056:flower bud, PO:0000033:fruit valve, PO:0004006:mesophyll cell, PO:0000036:leaf vascular system	-	#N/A
TraesCS3D02G017700.1	3D	TraesCS3D02G017700	6016878	6020801	-	bHLH	5	1468	372	6.53	41211.6	-	0.626554	Cluster3
TraesCS3D02G058100.1	3D	TraesCS3D02G058100	24501375	24502806	-	bHLH	3	1218	296	4.85	32064.2	-	1	Cluster6
TraesCS3D02G105100.1	3D	TraesCS3D02G105100	57328596	57336787	+	bHLH	2	1024	251	8.51	27374.3	-	0.900603	Cluster2
TraesCS3D02G106600.1	3D	TraesCS3D02G106600	58590499	58595582	-	bHLH	5	1503	401	5.76	43564.9	-	0.975197	Cluster4
TraesCS3D02G144700.1	3D	TraesCS3D02G144700	108281759	108284861	-	bHLH	3	768	255	9.22	26880.3	-	0.658537	Cluster5
TraesCS3D02G166300.1	3D	TraesCS3D02G166300	138192221	138195413	-	bHLH	2	2489	618	6.76	67564.1	PO:0009062:gynoecium, PO:0000252:endodermis	0.259442	Cluster3
TraesCS3D02G208500.1	3D	TraesCS3D02G208500	275635953	275637839	-	bHLH	2	1736	473	6.62	49246.3	-	0.846177	Cluster6
TraesCS3D02G210600.1	3D	TraesCS3D02G210600	279790812	279794084	+	bHLH	4	1669	392	5.55	42904.5	-	0.561683	Cluster3
TraesCS3D02G253700.1	3D	TraesCS3D02G253700	355318373	355321237	-	bHLH	1	2865	465	8.73	49816.4	-	0.758305	Cluster5
TraesCS3D02G309500.1	3D	TraesCS3D02G309500	423834858	423836002	+	bHLH	3	861	286	9.26	31287.6	-	0.959816	Cluster2
TraesCS3D02G344600.1	3D	TraesCS3D02G344600	456534317	456534958	+	bHLH	1	642	213	6.08	23003.8	-	0.954623	Cluster5
TraesCS3D02G388700.1	3D	TraesCS3D02G388700	503993272	503997224	-	bHLH	6	1802	366	7.68	38656.1	-	0.561638	Cluster5
TraesCS3D02G417300.1	3D	TraesCS3D02G417300	528956257	528959584	+	bHLH	8	2538	476	6.07	49897.7	PO:0020094:plant egg cell	0.38592	Cluster3
TraesCS3D02G433200.1	3D	TraesCS3D02G433200	546469113	546470770	+	bHLH	5	835	255	5.82	28197.8	-	1	Cluster1
TraesCS3D02G434900.1	3D	TraesCS3D02G434900	547428287	547431483	-	bHLH	4	1538	381	5.04	39549.8	-	0.77493	Cluster2
TraesCS3D02G435200.1	3D	TraesCS3D02G435200	547510792	547513015	-	bHLH	4	1175	316	9.28	33893.7	-	0.723152	Cluster5
TraesCS3D02G495300.1	3D	TraesCS3D02G495300	587584805	587586681	-	bHLH	3	859	234	6.66	26099.4	-	0.854096	Cluster3
TraesCS3D02G495400.1	3D	TraesCS3D02G495400	587593660	587596608	-	bHLH	3	1000	238	8.39	26751	-	0.950134	Cluster5
TraesCS3D02G495600.1	3D	TraesCS3D02G495600	587644739	587648644	-	bHLH	3	1025	245	6.8	27215.9	-	0.990439	Cluster1
TraesCS3D02G495700.1	3D	TraesCS3D02G495700	587745410	587748716	+	bHLH	3	1206	247	7.74	27201.8	-	0.981963	Cluster6
TraesCS4A02G016000.1	4A	TraesCS4A02G016000	10164187	10165250	-	bHLH	2	857	85	6.59	9603.87	-	0.870144	Cluster6
TraesCS4A02G016300.1	4A	TraesCS4A02G016300	10937515	10939391	+	bHLH	4	617	92	7.98	10377.7	PO:0000045:embryo root	0.884417	Cluster4
TraesCS4A02G028900.1	4A	TraesCS4A02G028900	21062686	21066407	-	bHLH	3	2165	597	6.56	65550.1	PO:0009062:gynoecium, PO:0000252:endodermis	0.46987	Cluster1
TraesCS4A02G047700.1	4A	TraesCS4A02G047700	38717565	38719345	-	bHLH	5	1314	329	5.46	35466.2	-	1	Cluster4
TraesCS4A02G059100.1	4A	TraesCS4A02G059100	54404601	54405867	-	bHLH	2	1169	332	6.76	36097.5	-	0.985069	Cluster4
TraesCS4A02G060200.1	4A	TraesCS4A02G060200	56501607	56506002	-	bHLH	10	3384	311	5.63	33759.7	-	0.817646	Cluster6
TraesCS4A02G087000.1	4A	TraesCS4A02G087000	91469656	91472749	+	bHLH	2	1688	406	5.58	43386.8	PO:0000272:protoxylem, PO:0000026:primary root tip	0.915043	Cluster6
TraesCS4A02G234500.1	4A	TraesCS4A02G234500	543373309	543376506	+	bHLH	8	2538	312	4.66	33935.4	-	0.793792	Cluster7
TraesCS4A02G255800.1	4A	TraesCS4A02G255800	567650741	567653692	+	bHLH	10	1456	323	5.94	35567.8	-	0.765941	Cluster1
TraesCS4A02G257900.1	4A	TraesCS4A02G257900	570910032	570912341	-	bHLH	4	2012	344	5.61	37367.1	-	0.944314	Cluster4
TraesCS4A02G263300.1	4A	TraesCS4A02G263300	575776524	575781443	-	bHLH	4	1802	487	4.91	51095	-	0.920375	Cluster2
TraesCS4A02G292700.1	4A	TraesCS4A02G292700	595282077	595284349	-	bHLH	4	1475	359	5.62	38113.7	PO:0004707:fruit dehiscence zone, PO:0006036:root epidermis, PO:0000051:petiole epidermis, PO:0009081:higher order inflorescence axis, PO:0006040:sepal epidermis, PO:0020128:leaf margin, PO:0009053:peduncle, PO:0006016:leaf epidermis, PO:0000112:shoot axis epidermis, PO:0006504:leaf trichome, PO:0000056:flower bud, PO:0000033:fruit valve, PO:0004006:mesophyll cell, PO:0000036:leaf vascular system	0.913379	Cluster6
TraesCS4A02G292800.1	4A	TraesCS4A02G292800	595294248	595297051	-	bHLH	4	1361	368	5.53	38968.7	PO:0004707:fruit dehiscence zone, PO:0006036:root epidermis, PO:0000051:petiole epidermis, PO:0009081:higher order inflorescence axis, PO:0006040:sepal epidermis, PO:0020128:leaf margin, PO:0009053:peduncle, PO:0006016:leaf epidermis, PO:0000112:shoot axis epidermis, PO:0006504:leaf trichome, PO:0000056:flower bud, PO:0000033:fruit valve, PO:0004006:mesophyll cell, PO:0000036:leaf vascular system	0.982959	Cluster4
TraesCS4A02G354100.1	4A	TraesCS4A02G354100	628848653	628851161	+	bHLH	4	1330	325	5.95	35174.7	PO:0004707:fruit dehiscence zone, PO:0006036:root epidermis, PO:0000051:petiole epidermis, PO:0009081:higher order inflorescence axis, PO:0006040:sepal epidermis, PO:0020128:leaf margin, PO:0009053:peduncle, PO:0006016:leaf epidermis, PO:0000112:shoot axis epidermis, PO:0006504:leaf trichome, PO:0000056:flower bud, PO:0000033:fruit valve, PO:0004006:mesophyll cell, PO:0000036:leaf vascular system	0.977974	Cluster6
TraesCS4A02G404700.1	4A	TraesCS4A02G404700	678217690	678220066	+	bHLH	3	1177	310	6.56	33669.9	-	0.909032	Cluster2
TraesCS4A02G408700.1	4A	TraesCS4A02G408700	681593110	681594154	+	bHLH	3	813	270	5.28	28264.7	PO:0004707:fruit dehiscence zone, PO:0006036:root epidermis, PO:0000051:petiole epidermis, PO:0009081:higher order inflorescence axis, PO:0006040:sepal epidermis, PO:0020128:leaf margin, PO:0009053:peduncle, PO:0006016:leaf epidermis, PO:0000112:shoot axis epidermis, PO:0006504:leaf trichome, PO:0000056:flower bud, PO:0000033:fruit valve, PO:0004006:mesophyll cell, PO:0000036:leaf vascular system	0.980143	Cluster6
TraesCS4A02G408800.1	4A	TraesCS4A02G408800	681653116	681658841	+	bHLH	3	1155	384	5.43	40855.8	PO:0004707:fruit dehiscence zone, PO:0006036:root epidermis, PO:0000051:petiole epidermis, PO:0009081:higher order inflorescence axis, PO:0006040:sepal epidermis, PO:0020128:leaf margin, PO:0009053:peduncle, PO:0006016:leaf epidermis, PO:0000112:shoot axis epidermis, PO:0006504:leaf trichome, PO:0000056:flower bud, PO:0000033:fruit valve, PO:0004006:mesophyll cell, PO:0000036:leaf vascular system	0.983248	Cluster4
TraesCS4B02G020700.1	4B	TraesCS4B02G020700	14652136	14654243	-	bHLH	4	1541	365	6	38677.5	PO:0004707:fruit dehiscence zone, PO:0006036:root epidermis, PO:0000051:petiole epidermis, PO:0009081:higher order inflorescence axis, PO:0006040:sepal epidermis, PO:0020128:leaf margin, PO:0009053:peduncle, PO:0006016:leaf epidermis, PO:0000112:shoot axis epidermis, PO:0006504:leaf trichome, PO:0000056:flower bud, PO:0000033:fruit valve, PO:0004006:mesophyll cell, PO:0000036:leaf vascular system	0.96383	Cluster4
TraesCS4B02G020900.1	4B	TraesCS4B02G020900	14839741	14842843	-	bHLH	4	1410	370	5.85	39251.4	PO:0004707:fruit dehiscence zone, PO:0006036:root epidermis, PO:0000051:petiole epidermis, PO:0009081:higher order inflorescence axis, PO:0006040:sepal epidermis, PO:0020128:leaf margin, PO:0009053:peduncle, PO:0006016:leaf epidermis, PO:0000112:shoot axis epidermis, PO:0006504:leaf trichome, PO:0000056:flower bud, PO:0000033:fruit valve, PO:0004006:mesophyll cell, PO:0000036:leaf vascular system	-	#N/A
TraesCS4B02G021100.1	4B	TraesCS4B02G021100	15146111	15150858	-	bHLH	4	1312	363	5.36	38443.5	PO:0004707:fruit dehiscence zone, PO:0006036:root epidermis, PO:0000051:petiole epidermis, PO:0009081:higher order inflorescence axis, PO:0006040:sepal epidermis, PO:0020128:leaf margin, PO:0009053:peduncle, PO:0006016:leaf epidermis, PO:0000112:shoot axis epidermis, PO:0006504:leaf trichome, PO:0000056:flower bud, PO:0000033:fruit valve, PO:0004006:mesophyll cell, PO:0000036:leaf vascular system	-	#N/A
TraesCS4B02G021200.1	4B	TraesCS4B02G021200	15259843	15263017	-	bHLH	5	1486	369	5.29	39174	PO:0004707:fruit dehiscence zone, PO:0006036:root epidermis, PO:0000051:petiole epidermis, PO:0009081:higher order inflorescence axis, PO:0006040:sepal epidermis, PO:0020128:leaf margin, PO:0009053:peduncle, PO:0006016:leaf epidermis, PO:0000112:shoot axis epidermis, PO:0006504:leaf trichome, PO:0000056:flower bud, PO:0000033:fruit valve, PO:0004006:mesophyll cell, PO:0000036:leaf vascular system	1	Cluster4
TraesCS4B02G021500.1	4B	TraesCS4B02G021500	15427234	15431878	-	bHLH	4	1301	357	5.22	37630.4	PO:0004707:fruit dehiscence zone, PO:0006036:root epidermis, PO:0000051:petiole epidermis, PO:0009081:higher order inflorescence axis, PO:0006040:sepal epidermis, PO:0020128:leaf margin, PO:0009053:peduncle, PO:0006016:leaf epidermis, PO:0000112:shoot axis epidermis, PO:0006504:leaf trichome, PO:0000056:flower bud, PO:0000033:fruit valve, PO:0004006:mesophyll cell, PO:0000036:leaf vascular system	0.971449	Cluster4
TraesCS4B02G051500.1	4B	TraesCS4B02G051500	40074250	40078403	+	bHLH	4	1830	494	5.06	51744.8	-	0.915401	Cluster2
TraesCS4B02G056600.1	4B	TraesCS4B02G056600	46221025	46223484	+	bHLH	4	2146	343	5.61	37162.9	-	0.913949	Cluster4
TraesCS4B02G059000.1	4B	TraesCS4B02G059000	49758033	49760545	-	bHLH	10	1641	323	6.16	35723	-	0.664892	Cluster1
TraesCS4B02G061800.1	4B	TraesCS4B02G061800	53484950	53487716	-	bHLH	5	1113	201	11.84	22997.3	-	0.520105	Cluster1
TraesCS4B02G080700.1	4B	TraesCS4B02G080700	78603378	78605148	-	bHLH	5	1387	312	4.81	33902.4	-	0.861456	Cluster7
TraesCS4B02G217400.1	4B	TraesCS4B02G217400	458456678	458460338	-	bHLH	2	2291	406	5.58	43352.7	PO:0000272:protoxylem, PO:0000026:primary root tip	0.912085	Cluster6
TraesCS4B02G234700.1	4B	TraesCS4B02G234700	489293340	489294603	-	bHLH	4	906	301	6.33	32455.5	-	0.915063	Cluster2
TraesCS4B02G235700.1	4B	TraesCS4B02G235700	492214511	492216948	-	bHLH	10	1513	324	5.91	35749	-	0.730059	Cluster6
TraesCS4B02G257200.1	4B	TraesCS4B02G257200	522503541	522505317	+	bHLH	5	1402	331	5.85	35800.7	-	0.96424	Cluster4
TraesCS4B02G276900.1	4B	TraesCS4B02G276900	558577386	558581601	+	bHLH	4	3092	598	6.73	65563.1	PO:0009062:gynoecium, PO:0000252:endodermis	0.463739	Cluster1
TraesCS4B02G287900.1	4B	TraesCS4B02G287900	572156854	572157818	-	bHLH	2	690	92	7.98	10367.6	PO:0000045:embryo root	0.81343	Cluster1
TraesCS4B02G288000.1	4B	TraesCS4B02G288000	573091431	573092121	+	bHLH	3	409	85	6.58	9619.86	-	0.95973	Cluster6
TraesCS4B02G304500.1	4B	TraesCS4B02G304500	592819415	592821925	+	bHLH	3	1339	309	6.56	33592.8	-	0.942167	Cluster2
TraesCS4B02G308100.1	4B	TraesCS4B02G308100	598455380	598459204	-	bHLH	3	1044	347	5.9	37406.1	PO:0004707:fruit dehiscence zone, PO:0006036:root epidermis, PO:0000051:petiole epidermis, PO:0009081:higher order inflorescence axis, PO:0006040:sepal epidermis, PO:0020128:leaf margin, PO:0009053:peduncle, PO:0006016:leaf epidermis, PO:0000112:shoot axis epidermis, PO:0006504:leaf trichome, PO:0000056:flower bud, PO:0000033:fruit valve, PO:0004006:mesophyll cell, PO:0000036:leaf vascular system	-	#N/A
TraesCS4B02G308200.1	4B	TraesCS4B02G308200	598910941	598914019	-	bHLH	3	1416	360	5.45	38510.3	PO:0004707:fruit dehiscence zone, PO:0006036:root epidermis, PO:0000051:petiole epidermis, PO:0009081:higher order inflorescence axis, PO:0006040:sepal epidermis, PO:0020128:leaf margin, PO:0009053:peduncle, PO:0006016:leaf epidermis, PO:0000112:shoot axis epidermis, PO:0006504:leaf trichome, PO:0000056:flower bud, PO:0000033:fruit valve, PO:0004006:mesophyll cell, PO:0000036:leaf vascular system	0.991981	Cluster4
TraesCS4B02G308300.1	4B	TraesCS4B02G308300	599168078	599170653	-	bHLH	3	1676	364	5.8	38809.5	PO:0004707:fruit dehiscence zone, PO:0006036:root epidermis, PO:0000051:petiole epidermis, PO:0009081:higher order inflorescence axis, PO:0006040:sepal epidermis, PO:0020128:leaf margin, PO:0009053:peduncle, PO:0006016:leaf epidermis, PO:0000112:shoot axis epidermis, PO:0006504:leaf trichome, PO:0000056:flower bud, PO:0000033:fruit valve, PO:0004006:mesophyll cell, PO:0000036:leaf vascular system	0.992512	Cluster4
TraesCS4B02G317900.1	4B	TraesCS4B02G317900	607841692	607844537	-	bHLH	6	945	314	8.47	33321.8	-	0.994625	Cluster1
TraesCS4B02G331900.1	4B	TraesCS4B02G331900	622333584	622334878	-	bHLH	6	918	305	5.58	32990.1	-	0.98597	Cluster6
TraesCS4B02G332000.1	4B	TraesCS4B02G332000	622476321	622478648	-	bHLH	4	1450	347	5.24	37246	-	0.9613	Cluster2
TraesCS4B02G335200.1	4B	TraesCS4B02G335200	626068045	626069037	-	bHLH	3	741	246	7.76	26692.1	-	1	Cluster6
TraesCS4B02G345800.1	4B	TraesCS4B02G345800	639452139	639453299	+	bHLH	3	936	311	6.36	33998.5	-	0.990296	Cluster1
TraesCS4B02G347100.1	4B	TraesCS4B02G347100	640822132	640824966	-	bHLH	4	1454	300	8.64	31687.4	-	0.886916	Cluster2
TraesCS4B02G364800.1	4B	TraesCS4B02G364800	652993859	653002438	-	bHLH	5	1391	256	5.28	27788.3	-	0.894976	Cluster7
TraesCS4B02G391500.1	4B	TraesCS4B02G391500	667343535	667345811	+	bHLH	7	966	321	5.76	35201.9	-	-	#N/A
TraesCS4B02G397300.1	4B	TraesCS4B02G397300	671696059	671698835	+	bHLH	5	1224	407	-	-	PO:0020048:microspore, TO:0000487:endosperm color	1	Cluster1
TraesCS4B02G397400.1	4B	TraesCS4B02G397400	671703590	671708063	+	bHLH	8	1851	564	5.18	62865.3	-	0.998725	Cluster1
TraesCS4B02G397800.1	4B	TraesCS4B02G397800	671764899	671776128	-	bHLH	6	1622	510	5.47	56999.6	-	0.971403	Cluster6
TraesCS4D02G018700.1	4D	TraesCS4D02G018700	7992189	7995548	+	bHLH	4	1420	361	5.29	38076.8	PO:0004707:fruit dehiscence zone, PO:0006036:root epidermis, PO:0000051:petiole epidermis, PO:0009081:higher order inflorescence axis, PO:0006040:sepal epidermis, PO:0020128:leaf margin, PO:0009053:peduncle, PO:0006016:leaf epidermis, PO:0000112:shoot axis epidermis, PO:0006504:leaf trichome, PO:0000056:flower bud, PO:0000033:fruit valve, PO:0004006:mesophyll cell, PO:0000036:leaf vascular system	0.988292	Cluster4
TraesCS4D02G018800.1	4D	TraesCS4D02G018800	8010706	8012521	+	bHLH	3	1663	317	5.93	33694.8	PO:0004707:fruit dehiscence zone, PO:0006036:root epidermis, PO:0000051:petiole epidermis, PO:0009081:higher order inflorescence axis, PO:0006040:sepal epidermis, PO:0020128:leaf margin, PO:0009053:peduncle, PO:0006016:leaf epidermis, PO:0000112:shoot axis epidermis, PO:0006504:leaf trichome, PO:0000056:flower bud, PO:0000033:fruit valve, PO:0004006:mesophyll cell, PO:0000036:leaf vascular system	0.908289	Cluster6
TraesCS4D02G019100.1	4D	TraesCS4D02G019100	8135697	8137501	-	bHLH	3	1359	364	5.85	38110.7	PO:0004707:fruit dehiscence zone, PO:0006036:root epidermis, PO:0000051:petiole epidermis, PO:0009081:higher order inflorescence axis, PO:0006040:sepal epidermis, PO:0020128:leaf margin, PO:0009053:peduncle, PO:0006016:leaf epidermis, PO:0000112:shoot axis epidermis, PO:0006504:leaf trichome, PO:0000056:flower bud, PO:0000033:fruit valve, PO:0004006:mesophyll cell, PO:0000036:leaf vascular system	0.974064	Cluster5
TraesCS4D02G019200.1	4D	TraesCS4D02G019200	8148948	8151717	-	bHLH	4	1286	360	5.6	38277.1	PO:0004707:fruit dehiscence zone, PO:0006036:root epidermis, PO:0000051:petiole epidermis, PO:0009081:higher order inflorescence axis, PO:0006040:sepal epidermis, PO:0020128:leaf margin, PO:0009053:peduncle, PO:0006016:leaf epidermis, PO:0000112:shoot axis epidermis, PO:0006504:leaf trichome, PO:0000056:flower bud, PO:0000033:fruit valve, PO:0004006:mesophyll cell, PO:0000036:leaf vascular system	0.997109	Cluster4
TraesCS4D02G051600.1	4D	TraesCS4D02G051600	27395032	27399921	+	bHLH	4	1847	499	5.03	52359.5	-	0.887339	Cluster2
TraesCS4D02G056900.1	4D	TraesCS4D02G056900	32062787	32065618	+	bHLH	4	2536	342	5.62	37041.8	-	0.922211	Cluster4
TraesCS4D02G058900.1	4D	TraesCS4D02G058900	34712315	34716185	-	bHLH	10	2001	316	5.87	34956.1	-	0.716541	Cluster1
TraesCS4D02G079500.1	4D	TraesCS4D02G079500	53750729	53752656	-	bHLH	5	1544	313	4.81	34024.6	-	0.968932	Cluster1
TraesCS4D02G217700.1	4D	TraesCS4D02G217700	373207386	373210501	-	bHLH	2	1702	406	5.58	43325.7	PO:0000272:protoxylem, PO:0000026:primary root tip	0.90554	Cluster6
TraesCS4D02G224600.1	4D	TraesCS4D02G224600	381551243	381559778	+	bHLH	8	1674	557	6.49	61405.7	-	-	#N/A
TraesCS4D02G235900.1	4D	TraesCS4D02G235900	397157076	397158557	-	bHLH	4	1202	322	4.99	34960.1	-	0.973356	Cluster4
TraesCS4D02G237100.1	4D	TraesCS4D02G237100	399180779	399182937	-	bHLH	10	1211	309	5.89	33749.7	-	0.818763	Cluster1
TraesCS4D02G257100.1	4D	TraesCS4D02G257100	426844330	426845987	+	bHLH	5	1237	331	5.36	35748.5	-	0.957663	Cluster3
TraesCS4D02G275500.1	4D	TraesCS4D02G275500	446427302	446430454	+	bHLH	2	2348	598	6.56	65588.1	PO:0009062:gynoecium, PO:0000252:endodermis	0.414849	Cluster1
TraesCS4D02G286600.1	4D	TraesCS4D02G286600	458090811	458091858	-	bHLH	2	696	92	7.98	10377.7	PO:0000045:embryo root	0.909104	Cluster4
TraesCS4D02G286800.1	4D	TraesCS4D02G286800	458993534	458994265	+	bHLH	3	461	85	6.58	9619.86	-	0.972197	Cluster6
TraesCS4D02G302700.1	4D	TraesCS4D02G302700	470506568	470509154	+	bHLH	3	1430	310	6.04	33679.7	-	0.902355	Cluster2
TraesCS4D02G306300.1	4D	TraesCS4D02G306300	474598568	474603146	-	bHLH	3	1569	341	5.44	36159.4	PO:0004707:fruit dehiscence zone, PO:0006036:root epidermis, PO:0000051:petiole epidermis, PO:0009081:higher order inflorescence axis, PO:0006040:sepal epidermis, PO:0020128:leaf margin, PO:0009053:peduncle, PO:0006016:leaf epidermis, PO:0000112:shoot axis epidermis, PO:0006504:leaf trichome, PO:0000056:flower bud, PO:0000033:fruit valve, PO:0004006:mesophyll cell, PO:0000036:leaf vascular system	0.975166	Cluster6
TraesCS4D02G306400.1	4D	TraesCS4D02G306400	474700560	474701269	-	bHLH	3	498	165	6.73	17477.5	PO:0004707:fruit dehiscence zone, PO:0006036:root epidermis, PO:0000051:petiole epidermis, PO:0009081:higher order inflorescence axis, PO:0006040:sepal epidermis, PO:0020128:leaf margin, PO:0009053:peduncle, PO:0006016:leaf epidermis, PO:0000112:shoot axis epidermis, PO:0006504:leaf trichome, PO:0000056:flower bud, PO:0000033:fruit valve, PO:0004006:mesophyll cell, PO:0000036:leaf vascular system	1	Cluster4
TraesCS4D02G328800.1	4D	TraesCS4D02G328800	487119229	487120910	-	bHLH	4	1297	353	4.69	37761.3	-	0.981108	Cluster6
TraesCS4D02G328900.1	4D	TraesCS4D02G328900	487228610	487230238	-	bHLH	4	1307	348	5.3	37316.9	-	0.891896	Cluster7
TraesCS4D02G329000.1	4D	TraesCS4D02G329000	487288998	487291202	-	bHLH	3	1136	294	5.68	31121.2	-	0.961782	Cluster4
TraesCS4D02G329100.1	4D	TraesCS4D02G329100	487343464	487345912	-	bHLH	4	1585	350	4.83	37604.2	-	0.94169	Cluster2
TraesCS4D02G330500.1	4D	TraesCS4D02G330500	488664910	488666567	-	bHLH	5	1198	316	6.65	34385	-	0.943433	Cluster1
TraesCS4D02G342000.1	4D	TraesCS4D02G342000	498684564	498686829	-	bHLH	4	912	303	8.64	31945.6	-	0.899492	Cluster2
TraesCS5A02G014800.1	5A	TraesCS5A02G014800	10196759	10201360	-	bHLH	4	2249	393	6.32	41464.2	PO:0004707:fruit dehiscence zone, PO:0006036:root epidermis, PO:0000051:petiole epidermis, PO:0009081:higher order inflorescence axis, PO:0006040:sepal epidermis, PO:0020128:leaf margin, PO:0009053:peduncle, PO:0006016:leaf epidermis, PO:0000112:shoot axis epidermis, PO:0006504:leaf trichome, PO:0000056:flower bud, PO:0000033:fruit valve, PO:0004006:mesophyll cell, PO:0000036:leaf vascular system	0.921455	Cluster5
TraesCS5A02G049600.1	5A	TraesCS5A02G049600	45369526	45371996	-	bHLH	5	2035	336	5.37	36597.9	-	0.652239	Cluster7
TraesCS5A02G067600.1	5A	TraesCS5A02G067600	74948114	74949751	+	bHLH	5	1253	290	4.76	31589.1	-	0.933463	Cluster1
TraesCS5A02G198900.1	5A	TraesCS5A02G198900	403756397	403757376	+	bHLH	2	874	290	5.08	31573.8	-	0.989341	Cluster5
TraesCS5A02G225700.1	5A	TraesCS5A02G225700	441476365	441479829	+	bHLH	7	1843	458	6.26	46137.7	-	0.93075	Cluster4
TraesCS5A02G230500.1	5A	TraesCS5A02G230500	445391740	445394815	+	bHLH	2	1662	335	5.43	34760.9	PO:0000272:protoxylem, PO:0000026:primary root tip	0.728982	Cluster1
TraesCS5A02G237500.1	5A	TraesCS5A02G237500	453519135	453519842	+	bHLH	1	708	235	6.12	25068.4	PO:0020102:portion of transmitting tissue, PO:0000030:septum, PO:0009056:flower nectary, PO:0007615:flower development stage	0.890594	Cluster6
TraesCS5A02G245600.1	5A	TraesCS5A02G245600	458966502	458967791	+	bHLH	2	1192	193	10.1	20785.4	-	0.86747	Cluster6
TraesCS5A02G248200.1	5A	TraesCS5A02G248200	462145049	462146831	+	bHLH	3	1223	345	5.38	36213.8	-	0.881184	Cluster1
TraesCS5A02G250600.1	5A	TraesCS5A02G250600	466025891	466028999	+	bHLH	7	1950	425	6.38	44547.5	-	0.865488	Cluster6
TraesCS5A02G251400.1	5A	TraesCS5A02G251400	467375084	467377119	+	bHLH	1	2036	592	8.63	65357.8	-	0.630172	Cluster6
TraesCS5A02G264800.1	5A	TraesCS5A02G264800	476835724	476838249	+	bHLH	5	1712	409	9.17	42930.1	-	0.786883	Cluster2
TraesCS5A02G279200.1	5A	TraesCS5A02G279200	488262138	488264683	-	bHLH	8	1857	376	5.08	39505.1	PO:0020094:plant egg cell	0.325605	Cluster3
TraesCS5A02G292900.1	5A	TraesCS5A02G292900	502785905	502788083	-	bHLH	8	1326	281	6.01	30775.4	-	0.895923	Cluster6
TraesCS5A02G306200.1	5A	TraesCS5A02G306200	515494843	515496141	-	bHLH	1	1299	279	5.92	29852.5	-	0.933063	Cluster6
TraesCS5A02G306400.1	5A	TraesCS5A02G306400	516664063	516664734	-	bHLH	1	672	223	6.98	23784.5	-	0.98352	Cluster6
TraesCS5A02G306500.1	5A	TraesCS5A02G306500	516814887	516815732	+	bHLH	1	846	281	5.74	30084.8	-	0.967097	Cluster6
TraesCS5A02G306600.1	5A	TraesCS5A02G306600	518411847	518412674	+	bHLH	1	828	275	5.86	29692.2	-	0.989372	Cluster6
TraesCS5A02G306700.1	5A	TraesCS5A02G306700	519693115	519693939	-	bHLH	1	825	274	5.87	29443	-	0.989332	Cluster6
TraesCS5A02G344300.1	5A	TraesCS5A02G344300	548627250	548629025	+	bHLH	3	1773	590	5.96	66119.9	-	0.985241	Cluster6
TraesCS5A02G376500.1	5A	TraesCS5A02G376500	574194918	574199874	-	bHLH	7	2013	487	6.39	51685.7	-	0.592501	Cluster3
TraesCS5A02G380900.1	5A	TraesCS5A02G380900	578061853	578067290	+	bHLH	3	4457	280	6.22	31231.1	-	0.724875	Cluster5
TraesCS5A02G401300.1	5A	TraesCS5A02G401300	594132650	594134217	+	bHLH	5	1155	289	9.21	31349.2	-	0.971694	Cluster5
TraesCS5A02G420200.1	5A	TraesCS5A02G420200	606893057	606895469	+	bHLH	8	1612	420	6.53	44607.8	-	0.610292	Cluster3
TraesCS5A02G441900.1	5A	TraesCS5A02G441900	622543627	622548765	+	bHLH	8	1171	281	-	-	-	0.226452	Cluster5
TraesCS5A02G466300.1	5A	TraesCS5A02G466300	644858945	644861107	+	bHLH	2	1616	250	5.92	26361.8	-	0.822478	Cluster6
TraesCS5A02G489500.1	5A	TraesCS5A02G489500	659338036	659342647	-	bHLH	9	2335	570	5.31	63155	-	0.90618	Cluster1
TraesCS5A02G496300.1	5A	TraesCS5A02G496300	663768577	663769733	-	bHLH	2	1088	269	5.21	28912.8	-	0.960138	Cluster1
TraesCS5A02G503300.1	5A	TraesCS5A02G503300	668225011	668226764	-	bHLH	4	1387	353	5.04	38033.6	-	0.892822	Cluster1
TraesCS5A02G503400.1	5A	TraesCS5A02G503400	668270255	668272058	-	bHLH	5	1086	361	5.47	38874.9	-	0.921276	Cluster6
TraesCS5A02G503500.1	5A	TraesCS5A02G503500	668578980	668580721	-	bHLH	4	1401	352	5.09	37778.5	-	0.868251	Cluster1
TraesCS5A02G505100.1	5A	TraesCS5A02G505100	670424992	670426149	-	bHLH	4	900	299	9.19	32579	-	-	#N/A
TraesCS5A02G515800.1	5A	TraesCS5A02G515800	679374004	679376596	-	bHLH	4	1171	303	8.64	32036.8	-	0.882901	Cluster2
TraesCS5A02G533200.1	5A	TraesCS5A02G533200	690546686	690554104	-	bHLH	5	1069	256	5.38	27792.4	-	0.973395	Cluster7
TraesCS5A02G533900.1	5A	TraesCS5A02G533900	691027167	691034591	-	bHLH	5	1107	236	4.78	25870.2	-	0.980884	Cluster7
TraesCS5A02G555200.1	5A	TraesCS5A02G555200	706677376	706678512	-	bHLH	3	936	311	6.54	33792.2	-	1	Cluster1
TraesCS5A02G555300.1	5A	TraesCS5A02G555300	706705261	706706358	-	bHLH	3	738	245	5.61	26619.6	-	-	#N/A
TraesCS5A02G558500.1	5A	TraesCS5A02G558500	709193171	709197273	+	bHLH	8	1758	585	5.26	64934.1	-	0.995949	Cluster7
TraesCS5B02G013000.1	5B	TraesCS5B02G013000	13081872	13086120	-	bHLH	4	1720	375	6.14	39690.1	PO:0004707:fruit dehiscence zone, PO:0006036:root epidermis, PO:0000051:petiole epidermis, PO:0009081:higher order inflorescence axis, PO:0006040:sepal epidermis, PO:0020128:leaf margin, PO:0009053:peduncle, PO:0006016:leaf epidermis, PO:0000112:shoot axis epidermis, PO:0006504:leaf trichome, PO:0000056:flower bud, PO:0000033:fruit valve, PO:0004006:mesophyll cell, PO:0000036:leaf vascular system	0.954452	Cluster4
TraesCS5B02G054800.1	5B	TraesCS5B02G054800	59926012	59928225	-	bHLH	5	1709	338	6.61	36866.7	-	0.736248	Cluster7
TraesCS5B02G074500.1	5B	TraesCS5B02G074500	88358037	88359846	+	bHLH	6	1331	290	5.15	31606.2	-	0.973033	Cluster1
TraesCS5B02G197500.1	5B	TraesCS5B02G197500	356215053	356216020	+	bHLH	2	861	286	5.15	31292.5	-	-	#N/A
TraesCS5B02G224200.1	5B	TraesCS5B02G224200	399297770	399301054	+	bHLH	7	1398	465	6.3	47044.8	-	0.937922	Cluster4
TraesCS5B02G229000.1	5B	TraesCS5B02G229000	405767604	405770206	+	bHLH	2	1339	334	5.51	34890	PO:0000272:protoxylem, PO:0000026:primary root tip	0.790435	Cluster1
TraesCS5B02G235200.1	5B	TraesCS5B02G235200	415127011	415128223	-	bHLH	1	1213	235	5.78	25266.5	PO:0020102:portion of transmitting tissue, PO:0000030:septum, PO:0009056:flower nectary, PO:0007615:flower development stage	0.890384	Cluster5
TraesCS5B02G243000.1	5B	TraesCS5B02G243000	423225256	423226113	+	bHLH	2	760	209	8.76	22621.5	-	0.899626	Cluster6
TraesCS5B02G245900.1	5B	TraesCS5B02G245900	427238477	427240453	+	bHLH	3	1428	344	5.29	36094.6	-	0.867553	Cluster1
TraesCS5B02G248600.1	5B	TraesCS5B02G248600	430740454	430742798	+	bHLH	7	1275	424	6.31	44432.4	-	0.853058	Cluster6
TraesCS5B02G249500.1	5B	TraesCS5B02G249500	432151849	432153888	+	bHLH	1	2040	592	8.29	65297.7	-	0.919415	Cluster5
TraesCS5B02G264300.1	5B	TraesCS5B02G264300	448465219	448467856	+	bHLH	5	1771	410	8.91	43085.2	-	0.71392	Cluster6
TraesCS5B02G278600.1	5B	TraesCS5B02G278600	464327229	464330058	-	bHLH	8	2105	373	5.14	39171.8	PO:0020094:plant egg cell	0.422937	Cluster3
TraesCS5B02G292100.1	5B	TraesCS5B02G292100	477609847	477611760	-	bHLH	8	1018	276	5.85	30115.7	-	0.86621	Cluster6
TraesCS5B02G306600.1	5B	TraesCS5B02G306600	490232175	490235058	-	bHLH	2	822	273	5.24	29588.1	-	0.988508	Cluster6
TraesCS5B02G306800.1	5B	TraesCS5B02G306800	490297469	490298311	-	bHLH	1	843	280	5.77	29932.5	-	0.890428	Cluster5
TraesCS5B02G307000.1	5B	TraesCS5B02G307000	490358257	490359536	-	bHLH	1	1280	279	5.93	29949.6	-	0.94343	Cluster6
TraesCS5B02G307100.1	5B	TraesCS5B02G307100	490610910	490612063	-	bHLH	1	1154	273	6.25	29429	-	0.977938	Cluster6
TraesCS5B02G380200.1	5B	TraesCS5B02G380200	558118484	558123470	-	bHLH	7	2071	447	6.08	47691.1	-	0.614389	Cluster3
TraesCS5B02G384500.1	5B	TraesCS5B02G384500	563149203	563153131	+	bHLH	3	2943	282	5.89	31338.2	-	0.742098	Cluster4
TraesCS5B02G406100.1	5B	TraesCS5B02G406100	582150972	582152832	+	bHLH	5	1462	275	8.15	29981.6	-	0.967076	Cluster2
TraesCS5B02G422000.1	5B	TraesCS5B02G422000	597218457	597222722	+	bHLH	10	2834	410	6.5	43237.4	-	0.6549	Cluster3
TraesCS5B02G445900.1	5B	TraesCS5B02G445900	617683795	617687445	+	bHLH	7	1666	281	5.98	30052.9	-	0.337894	Cluster5
TraesCS5B02G457600.1	5B	TraesCS5B02G457600	632146128	632150134	-	bHLH	6	1244	254	8.65	27299.2	-	0.411324	Cluster1
TraesCS5B02G478000.1	5B	TraesCS5B02G478000	650030059	650032275	+	bHLH	2	1667	251	5.92	26517	-	0.847393	Cluster4
TraesCS5B02G518400.1	5B	TraesCS5B02G518400	681342760	681344925	-	bHLH	4	1291	325	5.57	35072.5	PO:0004707:fruit dehiscence zone, PO:0006036:root epidermis, PO:0000051:petiole epidermis, PO:0009081:higher order inflorescence axis, PO:0006040:sepal epidermis, PO:0020128:leaf margin, PO:0009053:peduncle, PO:0006016:leaf epidermis, PO:0000112:shoot axis epidermis, PO:0006504:leaf trichome, PO:0000056:flower bud, PO:0000033:fruit valve, PO:0004006:mesophyll cell, PO:0000036:leaf vascular system	0.976201	Cluster6
TraesCS5B02G518500.1	5B	TraesCS5B02G518500	681616284	681618211	-	bHLH	5	978	325	6.27	35439.9	PO:0004707:fruit dehiscence zone, PO:0006036:root epidermis, PO:0000051:petiole epidermis, PO:0009081:higher order inflorescence axis, PO:0006040:sepal epidermis, PO:0020128:leaf margin, PO:0009053:peduncle, PO:0006016:leaf epidermis, PO:0000112:shoot axis epidermis, PO:0006504:leaf trichome, PO:0000056:flower bud, PO:0000033:fruit valve, PO:0004006:mesophyll cell, PO:0000036:leaf vascular system	1	Cluster6
TraesCS5B02G518800.1	5B	TraesCS5B02G518800	681737539	681740186	+	bHLH	3	1290	315	7.76	33970.4	PO:0004707:fruit dehiscence zone, PO:0006036:root epidermis, PO:0000051:petiole epidermis, PO:0009081:higher order inflorescence axis, PO:0006040:sepal epidermis, PO:0020128:leaf margin, PO:0009053:peduncle, PO:0006016:leaf epidermis, PO:0000112:shoot axis epidermis, PO:0006504:leaf trichome, PO:0000056:flower bud, PO:0000033:fruit valve, PO:0004006:mesophyll cell, PO:0000036:leaf vascular system	0.984401	Cluster1
TraesCS5D02G020600.1	5D	TraesCS5D02G020600	13313304	13318505	-	bHLH	5	1610	374	5.96	39708.9	PO:0004707:fruit dehiscence zone, PO:0006036:root epidermis, PO:0000051:petiole epidermis, PO:0009081:higher order inflorescence axis, PO:0006040:sepal epidermis, PO:0020128:leaf margin, PO:0009053:peduncle, PO:0006016:leaf epidermis, PO:0000112:shoot axis epidermis, PO:0006504:leaf trichome, PO:0000056:flower bud, PO:0000033:fruit valve, PO:0004006:mesophyll cell, PO:0000036:leaf vascular system	0.944973	Cluster4
TraesCS5D02G060300.1	5D	TraesCS5D02G060300	56950946	56953056	-	bHLH	5	1616	350	5.87	37957.5	-	0.721689	Cluster7
TraesCS5D02G078800.1	5D	TraesCS5D02G078800	78804171	78805805	+	bHLH	5	1245	289	4.81	31490	-	0.99394	Cluster1
TraesCS5D02G204800.1	5D	TraesCS5D02G204800	310258825	310259799	+	bHLH	2	867	288	5.07	31493.7	-	0.981286	Cluster2
TraesCS5D02G233000.1	5D	TraesCS5D02G233000	340509721	340512712	+	bHLH	7	1407	468	6.17	47148.8	-	0.87411	Cluster6
TraesCS5D02G237300.1	5D	TraesCS5D02G237300	345846268	345848814	-	bHLH	2	1297	337	5.36	34975.1	PO:0000272:protoxylem, PO:0000026:primary root tip	0.734748	Cluster1
TraesCS5D02G244000.1	5D	TraesCS5D02G244000	352453691	352454917	-	bHLH	1	1227	235	6.12	25162.5	PO:0020102:portion of transmitting tissue, PO:0000030:septum, PO:0009056:flower nectary, PO:0007615:flower development stage	0.851847	Cluster6
TraesCS5D02G252300.1	5D	TraesCS5D02G252300	358010268	358011147	+	bHLH	2	803	209	8.59	22496.4	-	0.944731	Cluster4
TraesCS5D02G255100.1	5D	TraesCS5D02G255100	361606156	361608151	+	bHLH	3	1461	336	5.29	35696.1	-	0.883009	Cluster1
TraesCS5D02G258300.1	5D	TraesCS5D02G258300	364742832	364747449	+	bHLH	9	3117	424	6.35	44372.3	-	0.843846	Cluster6
TraesCS5D02G259300.1	5D	TraesCS5D02G259300	365690937	365692969	+	bHLH	1	2033	592	8.88	65245.7	-	0.699949	Cluster1
TraesCS5D02G272800.1	5D	TraesCS5D02G272800	375677080	375679691	+	bHLH	5	1758	415	9	43346.5	-	0.720992	Cluster6
TraesCS5D02G286300.1	5D	TraesCS5D02G286300	386651892	386654354	-	bHLH	8	1753	368	5.22	38824.5	PO:0020094:plant egg cell	0.294269	Cluster3
TraesCS5D02G300100.1	5D	TraesCS5D02G300100	397424470	397426458	-	bHLH	8	1043	276	6.01	30128.7	-	0.847558	Cluster1
TraesCS5D02G313400.1	5D	TraesCS5D02G313400	408648884	408649705	-	bHLH	1	822	273	5.32	29286.8	-	-	#N/A
TraesCS5D02G313500.1	5D	TraesCS5D02G313500	408658939	408659778	-	bHLH	1	840	279	5.93	30100.7	-	0.924661	Cluster6
TraesCS5D02G313600.1	5D	TraesCS5D02G313600	408741338	408742523	-	bHLH	1	1186	279	5.93	29997.7	-	0.945864	Cluster6
TraesCS5D02G313700.1	5D	TraesCS5D02G313700	408769266	408770093	-	bHLH	1	828	275	6.14	29432.9	-	0.965854	Cluster6
TraesCS5D02G386500.1	5D	TraesCS5D02G386500	456339524	456344228	-	bHLH	7	2097	516	6.4	55086.6	-	0.739839	Cluster7
TraesCS5D02G390700.1	5D	TraesCS5D02G390700	459082580	459084833	+	bHLH	3	1244	284	6.02	31728.6	-	0.759901	Cluster4
TraesCS5D02G411600.1	5D	TraesCS5D02G411600	475000589	475001987	+	bHLH	5	1033	300	9.34	32615.7	-	-	#N/A
TraesCS5D02G428400.1	5D	TraesCS5D02G428400	486166681	486170950	+	bHLH	11	2708	414	6.05	43559.6	-	0.540207	Cluster3
TraesCS5D02G449200.1	5D	TraesCS5D02G449200	498379899	498383178	+	bHLH	7	1267	281	5.98	30026.9	-	0.32807	Cluster5
TraesCS5D02G459800.1	5D	TraesCS5D02G459800	503663583	503667476	-	bHLH	6	1312	252	8.65	27317.2	-	0.463476	Cluster3
TraesCS5D02G479100.1	5D	TraesCS5D02G479100	517446115	517448026	+	bHLH	2	1362	251	6.11	26374.8	-	0.866033	Cluster4
TraesCS5D02G517900.1	5D	TraesCS5D02G517900	539673606	539676094	-	bHLH	4	1360	324	5.83	34718.1	PO:0004707:fruit dehiscence zone, PO:0006036:root epidermis, PO:0000051:petiole epidermis, PO:0009081:higher order inflorescence axis, PO:0006040:sepal epidermis, PO:0020128:leaf margin, PO:0009053:peduncle, PO:0006016:leaf epidermis, PO:0000112:shoot axis epidermis, PO:0006504:leaf trichome, PO:0000056:flower bud, PO:0000033:fruit valve, PO:0004006:mesophyll cell, PO:0000036:leaf vascular system	0.981244	Cluster6
TraesCS6A02G045100.1	6A	TraesCS6A02G045100	23409174	23410981	+	bHLH	5	729	242	8.99	26327.2	-	0.21682	Cluster3
TraesCS6A02G071200.1	6A	TraesCS6A02G071200	39046927	39049951	-	bHLH	7	2083	554	4.66	59104.4	-	0.994155	Cluster6
TraesCS6A02G071300.1	6A	TraesCS6A02G071300	39129472	39132587	+	bHLH	8	2153	550	4.77	58497.8	-	0.989778	Cluster6
TraesCS6A02G114100.1	6A	TraesCS6A02G114100	84069612	84073535	-	bHLH	3	1157	300	9.06	31554.2	-	0.830487	Cluster2
TraesCS6A02G142000.1	6A	TraesCS6A02G142000	116812872	116813579	-	bHLH	1	708	235	5.95	25212.5	PO:0020102:portion of transmitting tissue, PO:0000030:septum, PO:0009056:flower nectary, PO:0007615:flower development stage	0.913958	Cluster5
TraesCS6A02G186200.1	6A	TraesCS6A02G186200	220737611	220742005	-	bHLH	5	2167	588	7.25	62881.6	-	0.859676	Cluster5
TraesCS6A02G190600.1	6A	TraesCS6A02G190600	254936294	254937809	+	bHLH	4	390	129	9.02	14513.5	-	0.81435	Cluster2
TraesCS6A02G204300.1	6A	TraesCS6A02G204300	355398725	355407981	-	bHLH	5	972	323	5.88	35403.3	-	0.498457	Cluster3
TraesCS6A02G214900.1	6A	TraesCS6A02G214900	394613029	394618337	-	bHLH	5	1247	314	7.21	32508.9	-	0.882568	Cluster6
TraesCS6A02G264200.1	6A	TraesCS6A02G264200	487691347	487694551	+	bHLH	3	1601	336	6.01	35843.3	-	0.913532	Cluster6
TraesCS6A02G268800.1	6A	TraesCS6A02G268800	495444913	495447811	-	bHLH	5	1836	459	5.26	50892	-	0.950863	Cluster6
TraesCS6A02G273000.1	6A	TraesCS6A02G273000	499405767	499407713	-	bHLH	6	1077	358	6.31	37704.4	-	0.932718	Cluster6
TraesCS6A02G276100.1	6A	TraesCS6A02G276100	502928916	502930189	+	bHLH	2	1175	291	5.41	30711.1	-	0.953866	Cluster6
TraesCS6A02G276200.1	6A	TraesCS6A02G276200	503248563	503249867	+	bHLH	2	1233	289	5.31	30269.9	-	1	Cluster4
TraesCS6A02G288100.1	6A	TraesCS6A02G288100	520539440	520543526	-	bHLH	12	2625	296	8.76	33021.5	-	0.596099	Cluster5
TraesCS6A02G306200.1	6A	TraesCS6A02G306200	539865142	539866437	+	bHLH	2	1139	88	7.95	9912.15	-	0.931282	Cluster6
TraesCS6A02G315700.1	6A	TraesCS6A02G315700	552264503	552266467	+	bHLH	3	1369	307	9.04	33155.7	-	0.953223	Cluster6
TraesCS6A02G335500.1	6A	TraesCS6A02G335500	568014446	568016143	-	bHLH	3	1227	351	6.17	37060.3	-	0.888568	Cluster1
TraesCS6A02G358400.1	6A	TraesCS6A02G358400	588455390	588459122	+	bHLH	5	1321	333	5.04	33942.5	-	0.761235	Cluster2
TraesCS6A02G373500.1	6A	TraesCS6A02G373500	596747628	596750799	-	bHLH	7	1542	302	7.25	33582.1	-	0.796175	Cluster1
TraesCS6B02G060700.1	6B	TraesCS6B02G060700	40282194	40285184	-	bHLH	5	1245	246	5.8	26364.9	-	0.336512	Cluster2
TraesCS6B02G095600.1	6B	TraesCS6B02G095600	71705696	71708698	-	bHLH	7	2059	553	4.66	58906.2	-	0.996287	Cluster6
TraesCS6B02G095700.1	6B	TraesCS6B02G095700	71839332	71842312	+	bHLH	7	2115	553	4.8	58657.9	-	0.992102	Cluster6
TraesCS6B02G142000.1	6B	TraesCS6B02G142000	141673165	141677127	-	bHLH	3	1116	300	8.8	31739.1	-	0.860783	Cluster2
TraesCS6B02G215200.1	6B	TraesCS6B02G215200	291064525	291067931	-	bHLH	5	2222	588	6.94	62901.7	-	0.949709	Cluster4
TraesCS6B02G220300.1	6B	TraesCS6B02G220300	313150513	313165965	+	bHLH	4	897	298	5.72	33043.6	-	0.56488	Cluster3
TraesCS6B02G244800.1	6B	TraesCS6B02G244800	437162916	437168918	-	bHLH	5	1423	303	7.21	31727.1	-	0.913887	Cluster6
TraesCS6B02G291200.1	6B	TraesCS6B02G291200	523776578	523779924	+	bHLH	3	1682	336	6.25	35919.6	-	0.895918	Cluster6
TraesCS6B02G295900.1	6B	TraesCS6B02G295900	531734694	531738230	-	bHLH	5	1781	408	5.64	45340.9	-	0.940874	Cluster6
TraesCS6B02G300400.1	6B	TraesCS6B02G300400	538374695	538377030	-	bHLH	6	1476	351	6.18	37339.9	-	0.727115	Cluster6
TraesCS6B02G303500.1	6B	TraesCS6B02G303500	543825432	543826839	+	bHLH	2	1313	286	5.41	30266.8	-	0.991864	Cluster4
TraesCS6B02G303600.1	6B	TraesCS6B02G303600	544092028	544093397	+	bHLH	2	1286	284	5.72	29809.5	-	0.933074	Cluster6
TraesCS6B02G317600.1	6B	TraesCS6B02G317600	565419275	565421395	-	bHLH	9	1080	359	8.22	39190.2	-	0.728563	Cluster3
TraesCS6B02G334600.1	6B	TraesCS6B02G334600	587798638	587799832	+	bHLH	2	1047	88	7.95	9900.1	-	0.905637	Cluster6
TraesCS6B02G346100.1	6B	TraesCS6B02G346100	609886384	609888238	+	bHLH	3	1269	319	8.28	34390.9	-	0.97255	Cluster6
TraesCS6B02G366200.1	6B	TraesCS6B02G366200	638933997	638935905	-	bHLH	3	1420	346	5.87	36436.5	-	0.922101	Cluster1
TraesCS6B02G391100.1	6B	TraesCS6B02G391100	665507900	665511646	+	bHLH	6	1502	359	5.74	37026.2	-	0.748985	Cluster2
TraesCS6B02G411300.1	6B	TraesCS6B02G411300	685199236	685202198	-	bHLH	7	1593	303	7.26	33584.9	-	0.773341	Cluster1
TraesCS6D02G051600.1	6D	TraesCS6D02G051600	24557542	24560459	-	bHLH	5	1259	246	5.81	26332.8	-	0.394425	Cluster2
TraesCS6D02G069300.1	6D	TraesCS6D02G069300	34733906	34736966	-	bHLH	7	2150	557	4.63	59210.5	-	0.997672	Cluster6
TraesCS6D02G069400.1	6D	TraesCS6D02G069400	34926453	34929634	+	bHLH	7	2420	554	4.82	58967.3	-	0.997948	Cluster6
TraesCS6D02G173300.1	6D	TraesCS6D02G173300	161355593	161359143	-	bHLH	5	2244	585	7.24	62488.2	-	0.981476	Cluster4
TraesCS6D02G185100.1	6D	TraesCS6D02G185100	237742564	237776364	+	bHLH	6	972	323	-	-	-	0.949018	Cluster1
TraesCS6D02G197500.1	6D	TraesCS6D02G197500	275152959	275163740	-	bHLH	7	1496	308	7.79	32407.8	-	0.923215	Cluster6
TraesCS6D02G246100.1	6D	TraesCS6D02G246100	348088798	348091730	+	bHLH	5	1683	408	5.56	45365.9	-	0.907692	Cluster6
TraesCS6D02G250700.1	6D	TraesCS6D02G250700	354417738	354420706	-	bHLH	3	1209	347	6.26	37047.9	-	0.925763	Cluster6
TraesCS6D02G253000.1	6D	TraesCS6D02G253000	357011615	357013944	-	bHLH	6	1482	354	6.1	37598.2	-	0.643361	Cluster6
TraesCS6D02G256300.1	6D	TraesCS6D02G256300	362634267	362635686	+	bHLH	3	1216	294	5.32	31248.8	-	0.980626	Cluster5
TraesCS6D02G256400.1	6D	TraesCS6D02G256400	362859375	362860791	+	bHLH	2	1320	275	6.09	29316.7	-	0.999102	Cluster4
TraesCS6D02G256500.1	6D	TraesCS6D02G256500	362887959	362889099	+	bHLH	2	1043	283	5.67	29620.1	-	0.981267	Cluster4
TraesCS6D02G256600.1	6D	TraesCS6D02G256600	362953658	362955121	+	bHLH	2	1351	289	5.31	30283.7	-	0.82847	Cluster5
TraesCS6D02G270900.1	6D	TraesCS6D02G270900	380444297	380447364	+	bHLH	11	1693	406	7.18	44079.6	-	0.713206	Cluster1
TraesCS6D02G285300.1	6D	TraesCS6D02G285300	393299134	393300534	+	bHLH	2	1260	88	7.95	9884.1	-	0.88857	Cluster6
TraesCS6D02G294900.1	6D	TraesCS6D02G294900	405672550	405674637	+	bHLH	3	1512	319	9.2	34232.8	-	0.931497	Cluster6
TraesCS6D02G315200.1	6D	TraesCS6D02G315200	423675094	423676867	+	bHLH	3	1281	342	5.96	35920.1	-	0.88494	Cluster1
TraesCS6D02G341200.1	6D	TraesCS6D02G341200	440363517	440367371	+	bHLH	6	1509	358	5.54	36663.7	-	0.710256	Cluster2
TraesCS6D02G357700.1	6D	TraesCS6D02G357700	451108693	451111761	-	bHLH	7	1635	297	7.83	33011.3	-	0.699187	Cluster1
TraesCS7A02G117100.1	7A	TraesCS7A02G117100	75035321	75036884	+	bHLH	3	1297	350	6.17	38321.2	-	0.976315	Cluster6
TraesCS7A02G126900.1	7A	TraesCS7A02G126900	81632449	81635423	+	bHLH	7	1259	331	6.54	36209.3	-	0.752368	Cluster7
TraesCS7A02G147500.1	7A	TraesCS7A02G147500	100623032	100625823	-	bHLH	6	1511	398	6.25	39489.9	-	0.960901	Cluster4
TraesCS7A02G157700.1	7A	TraesCS7A02G157700	110851569	110854670	-	bHLH	8	1443	480	4.8	51234.9	-	0.469559	Cluster3
TraesCS7A02G169700.1	7A	TraesCS7A02G169700	126122212	126122751	+	bHLH	1	540	179	9.68	19604.3	-	0.935501	Cluster6
TraesCS7A02G185300.1	7A	TraesCS7A02G185300	139468083	139469087	+	bHLH	2	828	88	9.09	9902.16	-	0.918885	Cluster6
TraesCS7A02G211900.1	7A	TraesCS7A02G211900	174913389	174915903	+	bHLH	8	1582	440	5.61	47542.6	-	0.427791	Cluster1
TraesCS7A02G229900.1	7A	TraesCS7A02G229900	200230140	200231461	-	bHLH	3	1120	285	5.5	29952.3	-	0.98724	Cluster6
TraesCS7A02G245800.1	7A	TraesCS7A02G245800	224036060	224037993	+	bHLH	6	1152	383	7.72	41242.1	-	0.532726	Cluster5
TraesCS7A02G256200.1	7A	TraesCS7A02G256200	244602908	244605269	-	bHLH	8	1628	394	6.14	42015.8	PO:0020094:plant egg cell	0.722031	Cluster6
TraesCS7A02G262600.1	7A	TraesCS7A02G262600	258823949	258825105	+	bHLH	1	1157	220	8.82	23951	PO:0020102:portion of transmitting tissue, PO:0000030:septum, PO:0009056:flower nectary, PO:0007615:flower development stage	0.965982	Cluster6
TraesCS7A02G263700.1	7A	TraesCS7A02G263700	261878991	261881167	-	bHLH	8	1337	310	6.76	33586.7	-	0.893107	Cluster6
TraesCS7A02G307700.1	7A	TraesCS7A02G307700	435723274	435729156	+	bHLH	6	1218	240	5.67	26333.1	-	0.297925	Cluster3
TraesCS7A02G311800.1	7A	TraesCS7A02G311800	442271921	442275298	-	bHLH	4	2025	521	5.34	54113.8	-	0.754573	Cluster2
TraesCS7A02G323000.1	7A	TraesCS7A02G323000	469357007	469359854	+	bHLH	2	1229	313	6.53	34738.7	-	0.829124	Cluster1
TraesCS7A02G340300.1	7A	TraesCS7A02G340300	498934725	498938538	+	bHLH	9	1104	265	5.11	28801	-	0.72608	Cluster1
TraesCS7A02G350900.1	7A	TraesCS7A02G350900	514434927	514437521	-	bHLH	3	1357	364	7.62	38931.4	PO:0006016:leaf epidermis, PO:0000017:vascular leaf primordium	0.965987	Cluster1
TraesCS7A02G362500.1	7A	TraesCS7A02G362500	536974720	536979827	+	bHLH	7	1820	516	8.55	54525.2	-	0.943514	Cluster4
TraesCS7A02G421000.1	7A	TraesCS7A02G421000	612112098	612119452	+	bHLH	3	1425	254	5.52	28437.1	-	-	#N/A
TraesCS7A02G543300.1	7A	TraesCS7A02G543300	720130601	720131944	+	bHLH	5	990	329	5.1	35473.5	-	0.744891	Cluster2
TraesCS7A02G558700.1	7A	TraesCS7A02G558700	730853500	730860017	-	bHLH	3	1152	321	6.31	34715	-	0.996348	Cluster6
TraesCS7B02G014500.1	7B	TraesCS7B02G014500	11529794	11531442	+	bHLH	3	1377	348	6.12	38177.1	-	0.996791	Cluster6
TraesCS7B02G026300.1	7B	TraesCS7B02G026300	25587510	25590636	+	bHLH	8	1210	339	6.51	36714.8	-	0.828593	Cluster7
TraesCS7B02G062100.1	7B	TraesCS7B02G062100	64726052	64732711	-	bHLH	9	2098	429	4.86	45809	-	0.473577	Cluster3
TraesCS7B02G074900.1	7B	TraesCS7B02G074900	84388710	84389462	+	bHLH	1	753	184	8.58	20235.1	-	0.871292	Cluster2
TraesCS7B02G090500.1	7B	TraesCS7B02G090500	104757511	104758622	+	bHLH	2	924	88	9.09	9872.13	-	0.942184	Cluster6
TraesCS7B02G118800.1	7B	TraesCS7B02G118800	138250067	138253528	+	bHLH	9	2084	440	5.58	47523.7	-	0.532059	Cluster1
TraesCS7B02G145800.1	7B	TraesCS7B02G145800	189496114	189498944	-	bHLH	6	2056	387	7.2	41497.3	-	0.469155	Cluster5
TraesCS7B02G152800.1	7B	TraesCS7B02G152800	203027560	203030111	-	bHLH	8	1802	385	5.95	41368.1	PO:0020094:plant egg cell	0.819395	Cluster6
TraesCS7B02G160500.1	7B	TraesCS7B02G160500	218975799	218976552	-	bHLH	1	754	221	8.82	24056	PO:0020102:portion of transmitting tissue, PO:0000030:septum, PO:0009056:flower nectary, PO:0007615:flower development stage	0.965099	Cluster6
TraesCS7B02G161700.1	7B	TraesCS7B02G161700	221913056	221915259	-	bHLH	8	1370	316	8.39	34370.2	-	0.919776	Cluster6
TraesCS7B02G195800.1	7B	TraesCS7B02G195800	336810475	336811878	-	bHLH	3	1204	292	5.35	30760	-	0.970211	Cluster1
TraesCS7B02G208000.1	7B	TraesCS7B02G208000	380712199	380717333	+	bHLH	6	985	240	5.38	26351	-	0.188457	Cluster3
TraesCS7B02G211600.1	7B	TraesCS7B02G211600	387160478	387163988	-	bHLH	4	2014	526	5.27	54520.3	-	0.740506	Cluster6
TraesCS7B02G223900.1	7B	TraesCS7B02G223900	423549254	423550509	+	bHLH	1	1256	321	6.54	35342.4	-	0.84736	Cluster1
TraesCS7B02G232000.1	7B	TraesCS7B02G232000	435001112	435003806	+	bHLH	3	1343	364	7.05	39141.7	PO:0006016:leaf epidermis, PO:0000017:vascular leaf primordium	0.941066	Cluster1
TraesCS7B02G251900.1	7B	TraesCS7B02G251900	464558383	464562153	+	bHLH	9	1248	272	5.04	29449.8	-	0.488862	Cluster1
TraesCS7B02G265900.1	7B	TraesCS7B02G265900	488404785	488409853	+	bHLH	7	1662	521	9.01	55748.7	-	0.919295	Cluster4
TraesCS7B02G303300.1	7B	TraesCS7B02G303300	541162963	541171473	-	bHLH	7	1486	314	8.4	33038.2	-	0.674548	Cluster1
TraesCS7B02G321400.1	7B	TraesCS7B02G321400	572033370	572046486	+	bHLH	3	750	249	6.45	27851.6	-	-	#N/A
TraesCS7B02G465400.1	7B	TraesCS7B02G465400	721806770	721808182	+	bHLH	4	1047	348	5.39	37426.6	-	0.812114	Cluster2
TraesCS7B02G483600.1	7B	TraesCS7B02G483600	741454864	741461091	-	bHLH	3	1264	321	8.27	34981.4	-	-	#N/A
TraesCS7D02G102200.1	7D	TraesCS7D02G102200	61759737	61760507	+	bHLH	1	771	256	6.09	28048.8	-	0.976905	Cluster6
TraesCS7D02G113100.1	7D	TraesCS7D02G113100	69265245	69266821	+	bHLH	3	1308	349	6.12	38159.2	-	0.991832	Cluster6
TraesCS7D02G124700.1	7D	TraesCS7D02G124700	78189683	78193093	+	bHLH	8	1786	338	6.68	36654.8	-	0.66592	Cluster1
TraesCS7D02G149400.1	7D	TraesCS7D02G149400	98382687	98385618	-	bHLH	7	1540	400	5.81	39537.9	-	0.960254	Cluster4
TraesCS7D02G158300.1	7D	TraesCS7D02G158300	106073524	106078186	-	bHLH	9	2096	480	4.8	51290	-	0.427926	Cluster3
TraesCS7D02G170900.1	7D	TraesCS7D02G170900	123219306	123220049	+	bHLH	1	744	185	9.68	20252	-	0.909492	Cluster6
TraesCS7D02G187000.1	7D	TraesCS7D02G187000	139828757	139829832	+	bHLH	2	923	88	9.09	9872.13	-	0.958363	Cluster6
TraesCS7D02G213500.1	7D	TraesCS7D02G213500	172252813	172256276	+	bHLH	8	2251	440	5.63	47603.7	-	0.619867	Cluster1
TraesCS7D02G230600.1	7D	TraesCS7D02G230600	191569907	191571178	-	bHLH	3	1069	286	5.5	30113.6	-	1	Cluster7
TraesCS7D02G244300.1	7D	TraesCS7D02G244300	212205036	212207925	+	bHLH	6	2118	386	7.12	41233.1	-	0.490347	Cluster5
TraesCS7D02G257000.1	7D	TraesCS7D02G257000	232407235	232409791	-	bHLH	8	1781	386	5.95	41339	PO:0020094:plant egg cell	0.781228	Cluster6
TraesCS7D02G263400.1	7D	TraesCS7D02G263400	243807629	243808407	+	bHLH	1	779	220	7.87	23885	PO:0020102:portion of transmitting tissue, PO:0000030:septum, PO:0009056:flower nectary, PO:0007615:flower development stage	0.979274	Cluster6
TraesCS7D02G264600.1	7D	TraesCS7D02G264600	245483201	245485651	-	bHLH	8	1630	296	6.07	32274.9	-	0.932148	Cluster6
TraesCS7D02G304500.1	7D	TraesCS7D02G304500	386499272	386510886	+	bHLH	5	1024	240	5.37	26305	-	0.32089	Cluster3
TraesCS7D02G308300.1	7D	TraesCS7D02G308300	390689894	390693353	-	bHLH	4	2010	526	5.27	54493.4	-	0.777303	Cluster1
TraesCS7D02G319600.1	7D	TraesCS7D02G319600	409162726	409164439	+	bHLH	2	1621	317	6.54	34974	-	0.862315	Cluster1
TraesCS7D02G327900.1	7D	TraesCS7D02G327900	419144509	419147225	+	bHLH	3	1484	364	7.63	38980.4	PO:0006016:leaf epidermis, PO:0000017:vascular leaf primordium	0.964793	Cluster1
TraesCS7D02G347900.1	7D	TraesCS7D02G347900	447065565	447069510	+	bHLH	9	1260	272	5.04	29497.9	-	0.419423	Cluster1
TraesCS7D02G360600.1	7D	TraesCS7D02G360600	463266132	463270821	-	bHLH	6	1242	413	6.73	44202.2	-	0.950396	Cluster4
TraesCS7D02G397300.1	7D	TraesCS7D02G397300	511990536	511998895	+	bHLH	7	1499	316	8.4	33152.4	-	0.680597	Cluster2
TraesCS7D02G529200.1	7D	TraesCS7D02G529200	623846324	623847674	+	bHLH	4	1017	338	5.39	36593.6	-	0.769749	Cluster2
TraesCSU02G029400.1	Un	TraesCSU02G029400	28297845	28303254	-	bHLH	9	2601	572	5.21	63759.5	-	0.961664	Cluster1
TraesCSU02G069300.1	Un	TraesCSU02G069300	60287914	60290270	+	bHLH	4	1059	352	-	-	-	0.949758	Cluster1
TraesCSU02G069400.1	Un	TraesCSU02G069400	60347854	60349804	-	bHLH	4	1059	352	4.91	37981.6	-	0.960578	Cluster6
TraesCSU02G075100.1	Un	TraesCSU02G075100	67332381	67334601	+	bHLH	3	1017	338	9.53	36747.2	-	1	Cluster6
TraesCSU02G075200.1	Un	TraesCSU02G075200	67357494	67359088	+	bHLH	4	1277	324	5.84	35128.7	-	0.98113	Cluster6
TraesCSU02G116000.1	Un	TraesCSU02G116000	100233724	100241333	+	bHLH	8	1634	456	5.24	50599.2	-	0.988367	Cluster2
TraesCSU02G138400.1	Un	TraesCSU02G138400	126896889	126906210	+	bHLH	5	1088	177	5.16	19822.4	-	0.973102	Cluster7
TraesCSU02G138900.1	Un	TraesCSU02G138900	126964334	126972736	+	bHLH	5	1681	257	5.2	27784.4	-	0.944433	Cluster7
TraesCSU02G222600.1	Un	TraesCSU02G222600	329014500	329015270	-	bHLH	2	741	246	5.77	26740.1	-	0.972082	Cluster6
TraesCSU02G228400.1	Un	TraesCSU02G228400	338428470	338430191	+	bHLH	3	1484	367	4.91	39977.2	-	0.968347	Cluster6
TraesCSU02G237100.1	Un	TraesCSU02G237100	350762158	350763723	+	bHLH	3	1328	367	4.9	39958.1	-	0.976682	Cluster6
TraesCS1A02G072600.1	1A	TraesCS1A02G072600	56617368	56618763	+	bZIP	1	1396	150	9.67	16284.3	-	0.386389	Cluster6
TraesCS1A02G096300.1	1A	TraesCS1A02G096300	91602861	91604969	+	bZIP	8	1255	335	5.71	36675.2	-	0.958905	Cluster6
TraesCS1A02G186000.1	1A	TraesCS1A02G186000	337150071	337152543	+	bZIP	4	1613	391	6.1	41888.5	-	0.864932	Cluster5
TraesCS1A02G258100.1	1A	TraesCS1A02G258100	449853942	449857196	-	bZIP	2	1947	648	8.08	68539.8	PO:0000036:leaf vascular system	0.421183	Cluster2
TraesCS1A02G273000.1	1A	TraesCS1A02G273000	466896602	466899623	+	bZIP	4	1409	253	6.08	26633.7	-	0.333919	Cluster1
TraesCS1A02G276600.1	1A	TraesCS1A02G276600	471695008	471701095	+	bZIP	13	2086	525	6.22	58025.4	-	0.960366	Cluster6
TraesCS1A02G306300.1	1A	TraesCS1A02G306300	498532631	498536872	+	bZIP	4	1771	324	7.88	35048.6	-	0.502379	Cluster1
TraesCS1A02G311900.1	1A	TraesCS1A02G311900	503376187	503377729	-	bZIP	1	1543	227	5.32	24455.1	-	0.591843	Cluster3
TraesCS1A02G329900.1	1A	TraesCS1A02G329900	518808509	518813919	-	bZIP	6	1381	366	5.1	39573.2	-	0.887294	Cluster2
TraesCS1A02G409800.1	1A	TraesCS1A02G409800	571286613	571291700	+	bZIP	12	1869	283	9.58	30130	-	0.651594	Cluster7
TraesCS1B02G091500.1	1B	TraesCS1B02G091500	92872054	92872506	+	bZIP	1	453	150	9.38	16206.2	-	0.604767	Cluster5
TraesCS1B02G127400.1	1B	TraesCS1B02G127400	156565523	156567675	-	bZIP	8	1293	340	6.14	37258.1	-	0.973814	Cluster2
TraesCS1B02G193800.1	1B	TraesCS1B02G193800	348861678	348864065	+	bZIP	4	1541	388	6.23	41725.4	-	0.870555	Cluster6
TraesCS1B02G268500.1	1B	TraesCS1B02G268500	471193653	471197176	-	bZIP	2	1821	606	8.09	63988.7	PO:0000036:leaf vascular system	0.398395	Cluster2
TraesCS1B02G282800.1	1B	TraesCS1B02G282800	491531227	491534307	+	bZIP	4	1352	252	6.08	26566.6	-	0.371522	Cluster1
TraesCS1B02G285800.1	1B	TraesCS1B02G285800	497124690	497131575	+	bZIP	14	2472	526	5.79	58065.3	-	0.824207	Cluster1
TraesCS1B02G317100.1	1B	TraesCS1B02G317100	542135029	542139174	+	bZIP	4	1723	322	7.9	34788.3	-	0.701605	Cluster2
TraesCS1B02G323600.1	1B	TraesCS1B02G323600	548540498	548542076	-	bZIP	1	1579	229	5.43	24656.2	-	0.626034	Cluster3
TraesCS1B02G343500.1	1B	TraesCS1B02G343500	571707250	571711531	-	bZIP	6	1714	409	5.32	44434.9	-	0.902043	Cluster2
TraesCS1B02G439800.1	1B	TraesCS1B02G439800	661513720	661517051	+	bZIP	11	1212	403	9.21	42730	-	0.669709	Cluster7
TraesCS1D02G075500.1	1D	TraesCS1D02G075500	57476559	57477974	+	bZIP	1	1416	150	9.38	16197.1	-	0.363526	Cluster6
TraesCS1D02G105300.1	1D	TraesCS1D02G105300	97214357	97217038	+	bZIP	8	1771	339	6.56	37114	-	0.940582	Cluster2
TraesCS1D02G191000.1	1D	TraesCS1D02G191000	263071853	263074207	+	bZIP	4	1510	386	6.23	41403	-	0.925915	Cluster4
TraesCS1D02G257400.1	1D	TraesCS1D02G257400	349562348	349566341	-	bZIP	2	2718	652	7.3	68897.1	PO:0000036:leaf vascular system	0.43294	Cluster1
TraesCS1D02G273100.1	1D	TraesCS1D02G273100	367400300	367403436	+	bZIP	4	1401	252	6.08	26548.6	-	0.355193	Cluster1
TraesCS1D02G276100.1	1D	TraesCS1D02G276100	372147878	372155789	+	bZIP	14	3666	525	5.91	58056.3	-	0.688101	Cluster3
TraesCS1D02G306000.1	1D	TraesCS1D02G306000	403273278	403277398	+	bZIP	4	1741	327	6.63	35401	-	0.577382	Cluster1
TraesCS1D02G312200.1	1D	TraesCS1D02G312200	407877901	407878584	-	bZIP	1	684	227	5.54	24362.1	-	0.710179	Cluster6
TraesCS1D02G332200.1	1D	TraesCS1D02G332200	422868961	422873459	-	bZIP	7	1566	403	5.76	43702.1	-	0.903646	Cluster2
TraesCS1D02G417100.1	1D	TraesCS1D02G417100	475516777	475520408	+	bZIP	11	1209	402	9.28	42748.2	-	0.640841	Cluster7
TraesCS2A02G097500.1	2A	TraesCS2A02G097500	51493493	51497387	-	bZIP	8	1396	333	8.48	37330.5	-	0.249339	Cluster1
TraesCS2A02G099400.1	2A	TraesCS2A02G099400	52391814	52394012	-	bZIP	4	1480	274	9.48	29836.7	PO:0005597:cambium	0.902834	Cluster6
TraesCS2A02G105700.1	2A	TraesCS2A02G105700	58124985	58129834	+	bZIP	4	1474	368	6.94	39688.3	-	0.574311	Cluster1
TraesCS2A02G140900.1	2A	TraesCS2A02G140900	86270037	86271693	-	bZIP	4	1340	306	6.11	33241.7	-	0.986828	Cluster1
TraesCS2A02G142800.1	2A	TraesCS2A02G142800	88009076	88013066	-	bZIP	2	2078	574	6.03	60781.7	PO:0000036:leaf vascular system	0.302191	Cluster3
TraesCS2A02G245700.1	2A	TraesCS2A02G245700	355454121	355461260	+	bZIP	9	1703	377	6.21	39190.3	-	0.328644	Cluster1
TraesCS2A02G352100.1	2A	TraesCS2A02G352100	592693622	592698265	-	bZIP	4	1698	373	5.76	39905.1	-	0.662178	Cluster1
TraesCS2A02G467100.1	2A	TraesCS2A02G467100	711541746	711542690	+	bZIP	2	816	131	10.08	14323	-	0.412985	Cluster5
TraesCS2A02G495400.1	2A	TraesCS2A02G495400	726985966	726986810	+	bZIP	2	730	200	10.12	22201.9	-	0.978748	Cluster6
TraesCS2A02G526300.1	2A	TraesCS2A02G526300	746682082	746688211	-	bZIP	8	2082	419	6.24	46270.2	-	0.368767	Cluster5
TraesCS2A02G534200.1	2A	TraesCS2A02G534200	749903452	749904473	-	bZIP	2	935	196	9.69	21127.7	-	0.728951	Cluster3
TraesCS2A02G534300.1	2A	TraesCS2A02G534300	749913988	749915405	-	bZIP	2	1313	178	9.29	19555.8	-	0.950511	Cluster4
TraesCS2B02G113200.1	2B	TraesCS2B02G113200	76816411	76820668	-	bZIP	8	1812	333	8.48	37289.4	-	0.303353	Cluster3
TraesCS2B02G115700.1	2B	TraesCS2B02G115700	79246730	79248684	+	bZIP	4	1224	274	9.48	29566.3	PO:0005597:cambium	0.885991	Cluster6
TraesCS2B02G122700.1	2B	TraesCS2B02G122700	90007487	90012286	+	bZIP	4	1549	370	6.94	39987.7	-	0.538414	Cluster1
TraesCS2B02G165700.1	2B	TraesCS2B02G165700	137854856	137856554	-	bZIP	4	1380	307	6.93	33353	-	0.981562	Cluster1
TraesCS2B02G167900.1	2B	TraesCS2B02G167900	140843932	140847330	-	bZIP	2	2078	570	6.2	60486.4	PO:0000036:leaf vascular system	0.255792	Cluster3
TraesCS2B02G269600.1	2B	TraesCS2B02G269600	366833480	366840747	-	bZIP	9	2013	376	6.68	39150.3	-	0.359126	Cluster1
TraesCS2B02G489900.1	2B	TraesCS2B02G489900	687248060	687248948	+	bZIP	2	777	134	9.91	14717.4	-	0.574863	Cluster5
TraesCS2B02G523600.1	2B	TraesCS2B02G523600	718396232	718397231	+	bZIP	2	880	183	10.14	20415.2	-	0.983754	Cluster6
TraesCS2B02G556600.1	2B	TraesCS2B02G556600	751317909	751324133	-	bZIP	8	2097	435	6.23	48378.5	-	0.481022	Cluster5
TraesCS2B02G564900.1	2B	TraesCS2B02G564900	756570543	756571237	-	bZIP	2	579	192	9.39	20848.2	-	-	#N/A
TraesCS2D02G096800.1	2D	TraesCS2D02G096800	49195871	49199822	-	bZIP	8	1400	333	8.48	37346.5	-	0.274458	Cluster3
TraesCS2D02G098700.1	2D	TraesCS2D02G098700	50988440	50990520	-	bZIP	4	1427	272	9.45	29506.4	PO:0005597:cambium	0.929396	Cluster6
TraesCS2D02G105400.1	2D	TraesCS2D02G105400	56795732	56801037	+	bZIP	4	2085	368	6.94	39657.2	-	0.63581	Cluster1
TraesCS2D02G144300.1	2D	TraesCS2D02G144300	85757274	85758888	-	bZIP	4	1300	306	6.35	33323.9	-	0.979877	Cluster1
TraesCS2D02G146100.1	2D	TraesCS2D02G146100	87753115	87757289	-	bZIP	2	2094	572	6.07	60589.4	PO:0000036:leaf vascular system	0.306872	Cluster3
TraesCS2D02G236200.1	2D	TraesCS2D02G236200	231595977	231603989	-	bZIP	9	1669	377	6.28	39246.4	-	0.217855	Cluster1
TraesCS2D02G467100.1	2D	TraesCS2D02G467100	572335224	572336093	+	bZIP	2	755	129	10.08	14098.7	-	0.576506	Cluster6
TraesCS2D02G495700.1	2D	TraesCS2D02G495700	592410871	592411878	+	bZIP	2	888	200	10.2	22227.9	-	0.936057	Cluster1
TraesCS2D02G529000.1	2D	TraesCS2D02G529000	616525223	616530794	-	bZIP	8	1999	425	5.86	46843.8	-	0.576862	Cluster5
TraesCS2D02G536700.1	2D	TraesCS2D02G536700	619045678	619046800	-	bZIP	2	1033	196	9.5	21207.8	-	0.958357	Cluster6
TraesCS2D02G536800.1	2D	TraesCS2D02G536800	619057756	619058495	-	bZIP	2	664	200	9.54	21702.2	-	0.975001	Cluster4
TraesCS3A02G128900.1	3A	TraesCS3A02G128900	106433266	106434028	+	bZIP	3	537	178	10.11	18827.9	-	0.583834	Cluster2
TraesCS3A02G131900.1	3A	TraesCS3A02G131900	108729433	108730771	+	bZIP	2	1252	318	7.02	35012	-	0.832479	Cluster1
TraesCS3A02G190700.1	3A	TraesCS3A02G190700	238676584	238691290	-	bZIP	9	1760	325	7.79	36098.6	-	0.349171	Cluster3
TraesCS3A02G200600.1	3A	TraesCS3A02G200600	332219332	332220670	-	bZIP	1	1339	154	7.66	16302.4	-	0.640744	Cluster3
TraesCS3A02G293700.1	3A	TraesCS3A02G293700	526508219	526511244	+	bZIP	4	1564	263	6.06	28680.8	-	0.878147	Cluster6
TraesCS3A02G330800.1	3A	TraesCS3A02G330800	575484115	575485515	+	bZIP	3	1044	214	5.7	23116	-	0.690659	Cluster3
TraesCS3A02G334100.1	3A	TraesCS3A02G334100	579377243	579383014	-	bZIP	12	2258	475	6.53	51766.9	-	0.663381	Cluster1
TraesCS3A02G337200.1	3A	TraesCS3A02G337200	584015491	584019577	-	bZIP	5	1668	338	9.26	36726.3	-	0.462014	Cluster2
TraesCS3A02G371800.1	3A	TraesCS3A02G371800	622277558	622279313	+	bZIP	4	1397	391	5.83	41802.4	PO:0000200:micropylar endosperm, PO:0007134:sporophyte vegetative stage, PO:0019018:plant embryo axis, PO:0001040:dry seed stage, TO:0000420:fertility related trait	0.81014	Cluster2
TraesCS3A02G371900.1	3A	TraesCS3A02G371900	622708130	622712365	+	bZIP	5	1322	374	5.47	40588.9	PO:0000200:micropylar endosperm, PO:0007134:sporophyte vegetative stage, PO:0019018:plant embryo axis, PO:0001040:dry seed stage, TO:0000420:fertility related trait	0.919269	Cluster2
TraesCS3A02G372000.1	3A	TraesCS3A02G372000	622718496	622720413	+	bZIP	5	1449	383	6.13	41440	PO:0000200:micropylar endosperm, PO:0007134:sporophyte vegetative stage, PO:0019018:plant embryo axis, PO:0001040:dry seed stage, TO:0000420:fertility related trait	0.905445	Cluster2
TraesCS3A02G372100.1	3A	TraesCS3A02G372100	622816520	622820231	+	bZIP	6	1737	382	5.6	41238.8	PO:0000200:micropylar endosperm, PO:0007134:sporophyte vegetative stage, PO:0019018:plant embryo axis, PO:0001040:dry seed stage, TO:0000420:fertility related trait	0.910063	Cluster2
TraesCS3A02G372200.1	3A	TraesCS3A02G372200	622897640	622901467	+	bZIP	6	1852	382	5.54	41859.5	PO:0000200:micropylar endosperm, PO:0007134:sporophyte vegetative stage, PO:0019018:plant embryo axis, PO:0001040:dry seed stage, TO:0000420:fertility related trait	0.919106	Cluster2
TraesCS3A02G372400.1	3A	TraesCS3A02G372400	623047081	623054386	-	bZIP	13	2236	570	6.55	61788.2	-	0.652072	Cluster3
TraesCS3A02G378700.1	3A	TraesCS3A02G378700	627966005	627968743	-	bZIP	4	1349	257	7.99	27314.6	-	0.807113	Cluster4
TraesCS3B02G167500.1	3B	TraesCS3B02G167500	167862538	167863776	-	bZIP	5	879	292	7.98	31749.5	-	-	#N/A
TraesCS3B02G220400.1	3B	TraesCS3B02G220400	269247185	269257631	+	bZIP	9	1703	327	7.79	36381.8	-	0.492569	Cluster1
TraesCS3B02G226200.1	3B	TraesCS3B02G226200	313807932	313808801	+	bZIP	1	870	149	8.41	15947.1	-	0.580622	Cluster3
TraesCS3B02G328400.1	3B	TraesCS3B02G328400	530235754	530238936	+	bZIP	4	1621	268	5.88	29087.1	-	0.900815	Cluster6
TraesCS3B02G360900.1	3B	TraesCS3B02G360900	572678592	572680212	+	bZIP	2	1525	253	5.69	27398.1	-	0.725734	Cluster3
TraesCS3B02G365100.1	3B	TraesCS3B02G365100	576449738	576455465	-	bZIP	12	2138	477	6.78	51918.1	-	0.742641	Cluster1
TraesCS3B02G368300.1	3B	TraesCS3B02G368300	580468739	580472902	-	bZIP	4	1619	343	9.42	37353.1	-	0.322625	Cluster2
TraesCS3B02G404200.1	3B	TraesCS3B02G404200	638960471	638962267	+	bZIP	4	1438	390	6.23	41868.5	PO:0000200:micropylar endosperm, PO:0007134:sporophyte vegetative stage, PO:0019018:plant embryo axis, PO:0001040:dry seed stage, TO:0000420:fertility related trait	0.893056	Cluster2
TraesCS3B02G404300.1	3B	TraesCS3B02G404300	639149389	639151199	+	bZIP	4	1452	391	5.62	42406.1	PO:0000200:micropylar endosperm, PO:0007134:sporophyte vegetative stage, PO:0019018:plant embryo axis, PO:0001040:dry seed stage, TO:0000420:fertility related trait	0.833517	Cluster2
TraesCS3B02G404400.1	3B	TraesCS3B02G404400	639399151	639401892	+	bZIP	5	1572	391	5.39	41795.4	PO:0000200:micropylar endosperm, PO:0007134:sporophyte vegetative stage, PO:0019018:plant embryo axis, PO:0001040:dry seed stage, TO:0000420:fertility related trait	0.88646	Cluster2
TraesCS3B02G404500.1	3B	TraesCS3B02G404500	639553616	639555147	+	bZIP	4	1176	391	5.22	41826.4	PO:0000200:micropylar endosperm, PO:0007134:sporophyte vegetative stage, PO:0019018:plant embryo axis, PO:0001040:dry seed stage, TO:0000420:fertility related trait	0.971954	Cluster7
TraesCS3B02G404600.1	3B	TraesCS3B02G404600	639752637	639756075	+	bZIP	5	1679	387	7.03	41658.5	PO:0000200:micropylar endosperm, PO:0007134:sporophyte vegetative stage, PO:0019018:plant embryo axis, PO:0001040:dry seed stage, TO:0000420:fertility related trait	0.870832	Cluster7
TraesCS3B02G404800.1	3B	TraesCS3B02G404800	640060963	640067490	-	bZIP	11	1706	526	6.64	57072.1	-	0.65956	Cluster3
TraesCS3B02G411300.1	3B	TraesCS3B02G411300	647819883	647823019	-	bZIP	4	1158	250	8.01	26792	-	0.677425	Cluster4
TraesCS3D02G129800.1	3D	TraesCS3D02G129800	89896229	89897594	+	bZIP	3	1136	178	9.99	18818.8	-	0.454611	Cluster2
TraesCS3D02G148200.1	3D	TraesCS3D02G148200	112960872	112963125	+	bZIP	5	1605	305	6.34	32929.4	-	0.912566	Cluster6
TraesCS3D02G194800.1	3D	TraesCS3D02G194800	187831578	187841477	+	bZIP	9	1193	284	9.44	32755	-	0.329462	Cluster3
TraesCS3D02G203300.1	3D	TraesCS3D02G203300	252334277	252335587	+	bZIP	1	1311	154	8.52	16293.4	-	0.633248	Cluster3
TraesCS3D02G293500.1	3D	TraesCS3D02G293500	403933319	403937848	+	bZIP	4	1596	268	5.88	29045.1	-	0.872081	Cluster6
TraesCS3D02G324200.1	3D	TraesCS3D02G324200	437475014	437476329	+	bZIP	3	959	214	5.49	22983.9	-	0.718051	Cluster3
TraesCS3D02G327600.1	3D	TraesCS3D02G327600	439677492	439683178	-	bZIP	12	2140	477	6.53	51979.2	-	0.612662	Cluster1
TraesCS3D02G330300.1	3D	TraesCS3D02G330300	442811263	442815265	-	bZIP	4	1372	337	9.37	36528.1	-	0.58755	Cluster2
TraesCS3D02G364900.1	3D	TraesCS3D02G364900	478738607	478740450	+	bZIP	4	1483	390	5.9	41799.5	PO:0000200:micropylar endosperm, PO:0007134:sporophyte vegetative stage, PO:0019018:plant embryo axis, PO:0001040:dry seed stage, TO:0000420:fertility related trait	0.824928	Cluster2
TraesCS3D02G365000.1	3D	TraesCS3D02G365000	479448572	479452313	+	bZIP	6	1780	396	6.12	42724.5	PO:0000200:micropylar endosperm, PO:0007134:sporophyte vegetative stage, PO:0019018:plant embryo axis, PO:0001040:dry seed stage, TO:0000420:fertility related trait	0.903283	Cluster2
TraesCS3D02G365200.1	3D	TraesCS3D02G365200	479612897	479620687	-	bZIP	12	2853	530	6.66	57555.5	-	0.706624	Cluster3
TraesCS3D02G365500.1	3D	TraesCS3D02G365500	479913145	479914658	-	bZIP	4	1152	383	5.81	41042.6	PO:0000200:micropylar endosperm, PO:0007134:sporophyte vegetative stage, PO:0019018:plant embryo axis, PO:0001040:dry seed stage, TO:0000420:fertility related trait	0.938075	Cluster2
TraesCS3D02G371900.1	3D	TraesCS3D02G371900	485069390	485072293	-	bZIP	4	1315	250	8.01	26779	-	0.776649	Cluster5
TraesCS4A02G073000.1	4A	TraesCS4A02G073000	71994845	72001894	+	bZIP	15	2071	303	9.04	31583	-	0.414427	Cluster3
TraesCS4A02G120500.1	4A	TraesCS4A02G120500	148547753	148548256	+	bZIP	1	504	167	6.12	18815.6	-	0.711046	Cluster5
TraesCS4A02G126300.1	4A	TraesCS4A02G126300	162423186	162427249	-	bZIP	11	1888	298	9.01	33337.6	-	0.392142	Cluster3
TraesCS4A02G128900.1	4A	TraesCS4A02G128900	165755388	165758038	-	bZIP	3	1313	225	9.68	24600.5	-	0.663476	Cluster6
TraesCS4A02G135600.1	4A	TraesCS4A02G135600	187260838	187265325	+	bZIP	4	1724	351	6.27	37911.1	-	0.629702	Cluster1
TraesCS4A02G183400.1	4A	TraesCS4A02G183400	460896761	460903389	+	bZIP	13	2630	540	6.44	58998.7	-	0.869669	Cluster6
TraesCS4A02G198100.1	4A	TraesCS4A02G198100	483174478	483175551	+	bZIP	5	667	204	9.23	21941.6	-	0.923239	Cluster7
TraesCS4A02G209900.1	4A	TraesCS4A02G209900	503628882	503632625	-	bZIP	4	1366	331	6.6	35408.2	-	0.3071	Cluster2
TraesCS4A02G291200.1	4A	TraesCS4A02G291200	594427634	594428144	+	bZIP	1	511	164	10.53	17494.6	-	0.920512	Cluster3
TraesCS4B02G113400.1	4B	TraesCS4B02G113400	128055546	128059145	-	bZIP	4	1368	329	6.46	35232.9	-	0.303601	Cluster2
TraesCS4B02G117400.1	4B	TraesCS4B02G117400	136057470	136061192	-	bZIP	6	1874	402	8.15	42159.2	-	0.927182	Cluster7
TraesCS4B02G135000.1	4B	TraesCS4B02G135000	176260221	176265796	+	bZIP	12	1701	566	6.4	62178.2	-	0.894906	Cluster1
TraesCS4B02G169600.1	4B	TraesCS4B02G169600	370422508	370426623	-	bZIP	4	1615	356	6.32	38399.6	-	0.721647	Cluster1
TraesCS4B02G175800.1	4B	TraesCS4B02G175800	386201155	386205040	+	bZIP	3	2548	225	9.68	24641.5	-	0.478148	Cluster3
TraesCS4B02G178600.1	4B	TraesCS4B02G178600	391537582	391541691	+	bZIP	10	2033	334	7.87	37268.2	-	0.355723	Cluster3
TraesCS4B02G184500.1	4B	TraesCS4B02G184500	403673961	403674653	-	bZIP	1	693	167	5.89	18755.2	-	0.740409	Cluster5
TraesCS4B02G229100.1	4B	TraesCS4B02G229100	480046625	480055011	+	bZIP	16	2099	381	9.17	40759.1	-	0.339283	Cluster1
TraesCS4B02G320400.1	4B	TraesCS4B02G320400	611852547	611855239	+	bZIP	4	1764	400	6.03	42666.5	-	0.766177	Cluster2
TraesCS4B02G338700.1	4B	TraesCS4B02G338700	631607982	631609068	-	bZIP	2	993	201	9.66	21838.3	-	0.980362	Cluster6
TraesCS4D02G020600.1	4D	TraesCS4D02G020600	8929762	8930253	-	bZIP	1	492	163	11.08	17324.4	-	0.880619	Cluster3
TraesCS4D02G110900.1	4D	TraesCS4D02G110900	91238451	91242191	-	bZIP	4	1309	330	6.41	35309.1	-	0.31386	Cluster2
TraesCS4D02G115200.1	4D	TraesCS4D02G115200	96045536	96046756	-	bZIP	4	921	204	7.89	21876.5	-	0.781161	Cluster1
TraesCS4D02G129900.1	4D	TraesCS4D02G129900	115934039	115940363	-	bZIP	13	2365	538	6.41	58834.5	-	0.672024	Cluster6
TraesCS4D02G171700.1	4D	TraesCS4D02G171700	298538263	298542643	-	bZIP	4	1720	351	6.27	37836.9	-	0.637921	Cluster1
TraesCS4D02G177700.1	4D	TraesCS4D02G177700	309499442	309502065	+	bZIP	3	1247	223	9.93	24518.4	-	0.712514	Cluster1
TraesCS4D02G180200.1	4D	TraesCS4D02G180200	314063385	314067508	+	bZIP	11	1945	298	9.01	33337.6	-	0.359614	Cluster3
TraesCS4D02G185500.1	4D	TraesCS4D02G185500	323371889	323372951	-	bZIP	1	1063	167	6.59	18699.4	-	0.94044	Cluster4
TraesCS4D02G230200.1	4D	TraesCS4D02G230200	390261172	390269701	+	bZIP	15	1940	361	9.19	38603.8	-	0.352213	Cluster1
TraesCS4D02G316900.1	4D	TraesCS4D02G316900	482155767	482160285	+	bZIP	5	3243	259	6.24	28058.4	-	0.828993	Cluster2
TraesCS4D02G335000.1	4D	TraesCS4D02G335000	493016624	493017640	+	bZIP	2	931	203	10.01	22283.8	-	0.81059	Cluster4
TraesCS5A02G020700.1	5A	TraesCS5A02G020700	16974088	16977075	+	bZIP	3	1655	293	5.78	31362.3	-	0.470874	Cluster1
TraesCS5A02G057500.1	5A	TraesCS5A02G057500	55024209	55028424	-	bZIP	6	894	297	5.31	32430.1	-	0.614392	Cluster3
TraesCS5A02G088300.1	5A	TraesCS5A02G088300	118670272	118671484	-	bZIP	2	1137	157	9.02	17385.5	-	0.233258	Cluster2
TraesCS5A02G115300.1	5A	TraesCS5A02G115300	231297277	231308467	-	bZIP	14	1544	386	6.52	41094.1	-	0.446887	Cluster3
TraesCS5A02G124600.1	5A	TraesCS5A02G124600	272946409	272951350	-	bZIP	4	1353	332	6.84	36076	-	0.302564	Cluster5
TraesCS5A02G126600.1	5A	TraesCS5A02G126600	279744751	279747068	+	bZIP	5	1464	380	6.42	39784.3	-	0.948162	Cluster7
TraesCS5A02G141500.1	5A	TraesCS5A02G141500	313904287	313908271	-	bZIP	4	1445	313	6.4	34883.2	-	0.338857	Cluster3
TraesCS5A02G143300.1	5A	TraesCS5A02G143300	317693568	317696195	+	bZIP	4	1012	239	6	26051.4	-	0.876761	Cluster6
TraesCS5A02G174200.1	5A	TraesCS5A02G174200	367556709	367565775	+	bZIP	12	1917	467	7.02	51252	-	0.781998	Cluster2
TraesCS5A02G179000.1	5A	TraesCS5A02G179000	377119825	377120707	+	bZIP	2	465	154	9.16	17166.4	PO:0000263:non-hair root epidermal cell	0.492783	Cluster3
TraesCS5A02G237200.1	5A	TraesCS5A02G237200	452934161	452937774	-	bZIP	5	1471	354	8.94	37797.8	-	0.390202	Cluster5
TraesCS5A02G250400.1	5A	TraesCS5A02G250400	465996281	465997233	-	bZIP	1	953	196	6.87	21828.3	-	0.847831	Cluster5
TraesCS5A02G265600.1	5A	TraesCS5A02G265600	477392155	477401214	-	bZIP	11	2632	518	6.51	57856.2	-	0.879377	Cluster2
TraesCS5A02G299400.1	5A	TraesCS5A02G299400	509035593	509039772	+	bZIP	5	1767	377	6.79	41096.9	-	0.449518	Cluster1
TraesCS5A02G308400.1	5A	TraesCS5A02G308400	521004358	521007137	+	bZIP	4	1741	510	10.16	54360.3	-	0.903383	Cluster2
TraesCS5A02G332000.1	5A	TraesCS5A02G332000	540593912	540594890	-	bZIP	2	874	204	9.85	21238.9	-	0.901674	Cluster6
TraesCS5A02G405200.1	5A	TraesCS5A02G405200	596580350	596581303	-	bZIP	1	954	169	11.63	18498.1	-	0.785978	Cluster3
TraesCS5A02G440400.1	5A	TraesCS5A02G440400	621759447	621764113	-	bZIP	6	1622	392	5.06	41249.8	-	0.372867	Cluster5
TraesCS5A02G460800.1	5A	TraesCS5A02G460800	641118961	641122483	-	bZIP	9	1584	355	8.89	36570.4	-	0.805609	Cluster7
TraesCS5A02G491600.1	5A	TraesCS5A02G491600	660441472	660443148	-	bZIP	5	771	256	6.14	28138.5	-	0.800822	Cluster2
TraesCS5A02G508600.1	5A	TraesCS5A02G508600	673089350	673090118	-	bZIP	2	650	206	10.13	22376.9	-	0.979497	Cluster6
TraesCS5B02G017700.1	5B	TraesCS5B02G017700	16419517	16421656	+	bZIP	3	1317	265	5.83	28098.5	-	0.328887	Cluster1
TraesCS5B02G059200.1	5B	TraesCS5B02G059200	65239386	65243879	+	bZIP	6	1161	298	5.41	32551.2	-	0.583908	Cluster3
TraesCS5B02G094300.1	5B	TraesCS5B02G094300	123760036	123761479	-	bZIP	1	1444	157	9.02	17410.5	-	0.214576	Cluster2
TraesCS5B02G122000.1	5B	TraesCS5B02G122000	218208104	218213334	-	bZIP	13	2767	366	6.47	39305.7	-	0.454411	Cluster3
TraesCS5B02G124200.1	5B	TraesCS5B02G124200	224320863	224326499	-	bZIP	4	1361	280	6.54	30022.5	-	0.364638	Cluster3
TraesCS5B02G125800.1	5B	TraesCS5B02G125800	228818362	228820628	+	bZIP	5	1405	380	6.48	39841.4	-	0.946943	Cluster7
TraesCS5B02G139800.1	5B	TraesCS5B02G139800	263544557	263548522	-	bZIP	4	1481	313	6.4	34887.3	-	0.403074	Cluster3
TraesCS5B02G142200.1	5B	TraesCS5B02G142200	268112228	268114952	+	bZIP	4	1148	239	6	26047.4	-	0.882611	Cluster6
TraesCS5B02G176700.1	5B	TraesCS5B02G176700	322858931	322859812	+	bZIP	3	462	153	8.95	16789.9	PO:0000263:non-hair root epidermal cell	0.548216	Cluster3
TraesCS5B02G235600.1	5B	TraesCS5B02G235600	415992503	415995942	+	bZIP	5	1515	365	7.77	39070.3	-	0.330536	Cluster5
TraesCS5B02G248400.1	5B	TraesCS5B02G248400	430679711	430680292	-	bZIP	1	582	193	6.87	21611.1	-	0.880245	Cluster5
TraesCS5B02G265300.1	5B	TraesCS5B02G265300	449612423	449621819	-	bZIP	11	2296	526	6.58	58691.1	-	0.847724	Cluster2
TraesCS5B02G301900.1	5B	TraesCS5B02G301900	486365149	486369400	-	bZIP	5	1649	377	6.74	41097.9	-	0.426587	Cluster1
TraesCS5B02G308800.1	5B	TraesCS5B02G308800	491568021	491570872	+	bZIP	4	1793	467	9.94	49733.3	-	0.868066	Cluster1
TraesCS5B02G332300.1	5B	TraesCS5B02G332300	516463277	516464598	-	bZIP	2	1224	199	9.85	20850.5	-	0.854485	Cluster6
TraesCS5B02G410000.1	5B	TraesCS5B02G410000	585023924	585024484	-	bZIP	1	561	186	11.25	20497.4	-	0.785718	Cluster2
TraesCS5B02G444100.1	5B	TraesCS5B02G444100	616652400	616656546	-	bZIP	6	1652	343	5.66	35877.9	-	0.384414	Cluster2
TraesCS5B02G470600.1	5B	TraesCS5B02G470600	643978490	643981969	-	bZIP	9	1494	357	8.71	36704.4	-	0.783744	Cluster7
TraesCS5D02G025800.1	5D	TraesCS5D02G025800	23073537	23076069	+	bZIP	3	1608	266	5.43	28266.6	-	0.419239	Cluster1
TraesCS5D02G068800.1	5D	TraesCS5D02G068800	65759302	65763941	-	bZIP	7	1229	298	5.32	32535.2	-	0.610998	Cluster3
TraesCS5D02G100700.1	5D	TraesCS5D02G100700	113390929	113392095	-	bZIP	2	1091	157	9.02	17413.5	-	0.220649	Cluster2
TraesCS5D02G124600.1	5D	TraesCS5D02G124600	189248290	189270176	+	bZIP	16	3277	388	6.33	41297.2	-	0.431565	Cluster3
TraesCS5D02G132300.1	5D	TraesCS5D02G132300	210676181	210681768	-	bZIP	4	1478	332	6.87	36031	-	0.373979	Cluster3
TraesCS5D02G134100.1	5D	TraesCS5D02G134100	214174392	214175520	+	bZIP	4	850	192	9.5	20772.4	-	0.974798	Cluster7
TraesCS5D02G148700.1	5D	TraesCS5D02G148700	237574847	237577465	-	bZIP	4	1028	239	6.18	26001.4	-	0.878883	Cluster6
TraesCS5D02G150700.1	5D	TraesCS5D02G150700	239938611	239942575	+	bZIP	4	1848	316	5.8	35177.6	-	0.370273	Cluster3
TraesCS5D02G178800.1	5D	TraesCS5D02G178800	278260567	278270134	+	bZIP	12	1852	466	7.83	51046.8	-	0.824225	Cluster2
TraesCS5D02G183500.1	5D	TraesCS5D02G183500	285247655	285248540	+	bZIP	2	465	154	9.16	17093.2	PO:0000263:non-hair root epidermal cell	0.499168	Cluster3
TraesCS5D02G244500.1	5D	TraesCS5D02G244500	352929302	352933182	+	bZIP	5	1646	366	7.79	39291.6	-	0.414145	Cluster5
TraesCS5D02G258000.1	5D	TraesCS5D02G258000	364670004	364671159	-	bZIP	1	1156	193	6.45	21582	-	0.871903	Cluster5
TraesCS5D02G273500.1	5D	TraesCS5D02G273500	376437850	376446745	-	bZIP	11	2014	518	6.55	57828.2	-	0.853867	Cluster2
TraesCS5D02G308600.1	5D	TraesCS5D02G308600	405394991	405399265	-	bZIP	5	1703	376	6.68	40903.7	-	0.468764	Cluster1
TraesCS5D02G315400.1	5D	TraesCS5D02G315400	409876169	409878957	+	bZIP	4	1731	467	9.67	49680.2	-	0.832778	Cluster1
TraesCS5D02G338000.1	5D	TraesCS5D02G338000	426456913	426458295	-	bZIP	2	1273	199	9.85	20947.6	-	0.896889	Cluster4
TraesCS5D02G415300.1	5D	TraesCS5D02G415300	477393531	477394094	-	bZIP	1	564	187	11.34	20615.5	-	0.732179	Cluster6
TraesCS5D02G447500.1	5D	TraesCS5D02G447500	497783476	497787581	-	bZIP	6	1612	406	5.14	42383	-	0.491992	Cluster7
TraesCS5D02G473000.1	5D	TraesCS5D02G473000	513467948	513471573	-	bZIP	9	1618	362	8.7	37053.8	-	0.745907	Cluster2
TraesCS6A02G087400.1	6A	TraesCS6A02G087400	55739695	55743604	-	bZIP	12	951	316	5.89	33288.2	-	0.324589	Cluster5
TraesCS6A02G096300.1	6A	TraesCS6A02G096300	63609498	63610355	-	bZIP	1	858	174	8.02	18258.6	-	0.617011	Cluster2
TraesCS6A02G154600.1	6A	TraesCS6A02G154600	143376818	143378877	-	bZIP	5	942	313	5.42	32930.6	PO:0003015:primary root differentiation zone, PO:0006203:pericycle, PO:0025257:primary root elongation zone, PO:0005417:phloem	0.565262	Cluster5
TraesCS6A02G165800.1	6A	TraesCS6A02G165800	166982263	166991094	-	bZIP	9	2311	466	7.01	50948.3	-	0.664023	Cluster1
TraesCS6A02G170600.1	6A	TraesCS6A02G170600	181012773	181013836	+	bZIP	1	1064	177	9.01	19139.1	-	0.938734	Cluster4
TraesCS6A02G175800.1	6A	TraesCS6A02G175800	191230114	191246438	-	bZIP	4	1005	156	9.83	17293	-	0.668619	Cluster5
TraesCS6A02G288900.1	6A	TraesCS6A02G288900	520869519	520870447	+	bZIP	1	929	206	6.76	22578.4	-	0.925139	Cluster6
TraesCS6A02G333600.1	6A	TraesCS6A02G333600	564715783	564719442	+	bZIP	4	1390	340	8.74	36643.5	-	0.476474	Cluster5
TraesCS6B02G110100.1	6B	TraesCS6B02G110100	92472400	92477583	-	bZIP	14	1612	349	5.96	36743.2	-	0.298139	Cluster5
TraesCS6B02G124700.1	6B	TraesCS6B02G124700	119848790	119849317	-	bZIP	1	528	175	8.04	18340.7	-	0.721659	Cluster2
TraesCS6B02G182500.1	6B	TraesCS6B02G182500	204333125	204335736	-	bZIP	5	1482	312	5.42	32830.4	PO:0003015:primary root differentiation zone, PO:0006203:pericycle, PO:0025257:primary root elongation zone, PO:0005417:phloem	0.664554	Cluster3
TraesCS6B02G193200.1	6B	TraesCS6B02G193200	227641866	227651596	-	bZIP	9	2113	457	6.98	49907.2	-	0.823713	Cluster6
TraesCS6B02G198700.1	6B	TraesCS6B02G198700	237731023	237731556	+	bZIP	1	534	177	6.92	19280.2	-	0.910611	Cluster2
TraesCS6B02G209600.1	6B	TraesCS6B02G209600	276509953	276515528	+	bZIP	4	852	156	9.83	17293	-	0.630761	Cluster5
TraesCS6B02G318700.1	6B	TraesCS6B02G318700	566535116	566536038	+	bZIP	1	923	207	6.5	22988.7	-	0.920378	Cluster6
TraesCS6B02G364000.1	6B	TraesCS6B02G364000	635168431	635172842	+	bZIP	5	1235	351	9.6	37854.2	-	0.616945	Cluster5
TraesCS6D02G087400.1	6D	TraesCS6D02G087400	52723884	52724408	-	bZIP	1	525	174	8.04	18200.5	-	0.713764	Cluster2
TraesCS6D02G144400.1	6D	TraesCS6D02G144400	115020121	115022938	-	bZIP	6	1523	311	5.42	32761.4	PO:0003015:primary root differentiation zone, PO:0006203:pericycle, PO:0025257:primary root elongation zone, PO:0005417:phloem	0.543619	Cluster5
TraesCS6D02G154400.1	6D	TraesCS6D02G154400	129486855	129495855	-	bZIP	9	1869	466	7.01	50984.2	-	0.84079	Cluster6
TraesCS6D02G160200.1	6D	TraesCS6D02G160200	138384337	138384867	+	bZIP	1	531	176	9.38	19242.3	-	0.956673	Cluster6
TraesCS6D02G167800.1	6D	TraesCS6D02G167800	151936748	151954502	+	bZIP	4	1092	156	9.83	17293	-	0.696069	Cluster5
TraesCS6D02G270000.1	6D	TraesCS6D02G270000	379723542	379724388	-	bZIP	1	847	199	6.5	22349	-	0.914352	Cluster6
TraesCS6D02G312800.1	6D	TraesCS6D02G312800	421879860	421884322	+	bZIP	5	1671	360	9.7	38670.1	-	0.509331	Cluster5
TraesCS7A02G170600.1	7A	TraesCS7A02G170600	126576805	126581468	+	bZIP	4	1363	343	8.5	36979.2	-	0.67756	Cluster2
TraesCS7A02G181100.1	7A	TraesCS7A02G181100	135901026	135901878	-	bZIP	1	853	217	6.76	23383	-	0.957992	Cluster6
TraesCS7A02G207100.1	7A	TraesCS7A02G207100	169397681	169401164	-	bZIP	10	1726	443	7.86	48312.6	PO:0020149:quiescent center, PO:0020130:central root cap, PO:0006081:primary root apical meristem	0.737372	Cluster1
TraesCS7A02G211500.1	7A	TraesCS7A02G211500	174273570	174274127	-	bZIP	1	558	185	5.97	20930.4	-	0.700831	Cluster3
TraesCS7A02G266400.1	7A	TraesCS7A02G266400	268862051	268865961	+	bZIP	5	2265	365	6.49	39384.3	-	0.824461	Cluster1
TraesCS7A02G268700.1	7A	TraesCS7A02G268700	272338737	272344779	+	bZIP	4	1823	467	6.61	50198.6	-	0.365099	Cluster2
TraesCS7A02G373800.1	7A	TraesCS7A02G373800	546702334	546707369	+	bZIP	4	1010	164	9.97	17551.2	-	0.844646	Cluster5
TraesCS7A02G391800.1	7A	TraesCS7A02G391800	567590948	567591676	-	bZIP	1	729	242	10.13	26055.3	-	0.923386	Cluster2
TraesCS7A02G398400.1	7A	TraesCS7A02G398400	577442929	577445080	-	bZIP	3	1229	302	4.65	32643.7	PO:0000056:flower bud	0.221288	Cluster5
TraesCS7A02G420400.1	7A	TraesCS7A02G420400	611801000	611805312	-	bZIP	3	1156	306	6.99	34329.2	-	0.625495	Cluster3
TraesCS7A02G488600.1	7A	TraesCS7A02G488600	678969030	678971199	-	bZIP	6	1396	250	7.02	27051.1	PO:0003015:primary root differentiation zone, PO:0006203:pericycle, PO:0025257:primary root elongation zone, PO:0005417:phloem	0.552075	Cluster7
TraesCS7A02G530300.1	7A	TraesCS7A02G530300	709638421	709641769	+	bZIP	3	1575	253	5.69	27366.6	-	0.276745	Cluster1
TraesCS7A02G530400.1	7A	TraesCS7A02G530400	709674450	709675016	+	bZIP	1	567	188	6.86	20681.2	-	0.771658	Cluster3
TraesCS7A02G531800.1	7A	TraesCS7A02G531800	709998136	709998914	-	bZIP	1	779	195	7.25	21305.9	-	0.690232	Cluster3
TraesCS7A02G542700.1	7A	TraesCS7A02G542700	719469821	719473122	-	bZIP	3	1433	164	9.26	17975.3	-	0.972495	Cluster4
TraesCS7B02G075600.1	7B	TraesCS7B02G075600	85127850	85133586	+	bZIP	4	1421	340	8.84	36778.1	-	0.667627	Cluster2
TraesCS7B02G086100.1	7B	TraesCS7B02G086100	99130273	99131187	-	bZIP	1	915	223	7.9	24067.6	-	0.897476	Cluster7
TraesCS7B02G114300.1	7B	TraesCS7B02G114300	132168398	132171701	-	bZIP	10	1635	448	7.36	48464.7	PO:0020149:quiescent center, PO:0020130:central root cap, PO:0006081:primary root apical meristem	0.785453	Cluster1
TraesCS7B02G118500.1	7B	TraesCS7B02G118500	137880117	137880671	-	bZIP	1	555	184	5.97	20798.2	-	0.70304	Cluster3
TraesCS7B02G166100.1	7B	TraesCS7B02G166100	228917240	228920939	-	bZIP	5	1874	370	6.43	39705.7	-	0.74921	Cluster1
TraesCS7B02G293700.1	7B	TraesCS7B02G293700	530434419	530434922	-	bZIP	1	504	167	7.91	18024	-	0.931448	Cluster2
TraesCS7B02G293900.1	7B	TraesCS7B02G293900	530590326	530590829	-	bZIP	1	504	167	7.91	18051	-	0.959786	Cluster2
TraesCS7B02G299200.1	7B	TraesCS7B02G299200	536004935	536007205	-	bZIP	3	1244	302	4.7	32698.6	PO:0000056:flower bud	0.229748	Cluster5
TraesCS7B02G321300.1	7B	TraesCS7B02G321300	571890616	571893652	-	bZIP	3	1251	324	6.17	36458.9	-	0.711417	Cluster3
TraesCS7B02G391800.1	7B	TraesCS7B02G391800	658219136	658221394	-	bZIP	6	1501	248	7.74	26812.9	PO:0003015:primary root differentiation zone, PO:0006203:pericycle, PO:0025257:primary root elongation zone, PO:0005417:phloem	0.535497	Cluster7
TraesCS7B02G447900.1	7B	TraesCS7B02G447900	710990135	710993126	+	bZIP	3	1246	255	5.59	27439.7	-	0.401661	Cluster5
TraesCS7B02G448000.1	7B	TraesCS7B02G448000	711000616	711001183	+	bZIP	1	568	176	6.75	19158.6	-	0.760923	Cluster3
TraesCS7B02G449200.1	7B	TraesCS7B02G449200	711484856	711485470	-	bZIP	1	615	204	7.31	22318	-	0.742419	Cluster3
TraesCS7B02G464700.1	7B	TraesCS7B02G464700	721062468	721065544	-	bZIP	3	1454	165	9.46	17974.3	-	0.956653	Cluster6
TraesCS7D02G171300.1	7D	TraesCS7D02G171300	123653486	123658548	+	bZIP	4	1455	345	8.84	37304.7	-	0.655966	Cluster2
TraesCS7D02G182900.1	7D	TraesCS7D02G182900	136252840	136253741	-	bZIP	1	902	221	7.83	23820.3	-	0.899135	Cluster6
TraesCS7D02G209800.1	7D	TraesCS7D02G209800	167584688	167588228	-	bZIP	10	1713	448	7.36	48437.7	PO:0020149:quiescent center, PO:0020130:central root cap, PO:0006081:primary root apical meristem	0.778969	Cluster1
TraesCS7D02G213200.1	7D	TraesCS7D02G213200	171372123	171372677	-	bZIP	1	555	184	5.77	20811.3	-	0.727545	Cluster3
TraesCS7D02G268400.1	7D	TraesCS7D02G268400	252240995	252244356	-	bZIP	5	1922	368	6.81	39581.6	-	0.482726	Cluster3
TraesCS7D02G269300.1	7D	TraesCS7D02G269300	254142197	254148277	+	bZIP	4	2256	473	6.62	50965.4	-	0.34322	Cluster2
TraesCS7D02G349300.1	7D	TraesCS7D02G349300	449070145	449076162	-	bZIP	4	1068	207	9.97	22510.5	-	0.903152	Cluster5
TraesCS7D02G392800.1	7D	TraesCS7D02G392800	507817707	507819869	-	bZIP	3	1256	302	4.65	32728.7	PO:0000056:flower bud	0.242729	Cluster5
TraesCS7D02G413100.1	7D	TraesCS7D02G413100	531579379	531580047	-	bZIP	2	582	193	8.63	21869.5	-	0.695799	Cluster3
TraesCS7D02G475100.1	7D	TraesCS7D02G475100	587119217	587120736	-	bZIP	6	744	247	8.38	26985.1	PO:0003015:primary root differentiation zone, PO:0006203:pericycle, PO:0025257:primary root elongation zone, PO:0005417:phloem	0.635641	Cluster7
TraesCS7D02G518100.1	7D	TraesCS7D02G518100	616899403	616903325	+	bZIP	4	1371	250	5.69	27128.4	-	0.326066	Cluster1
TraesCS7D02G518200.1	7D	TraesCS7D02G518200	616908091	616908894	+	bZIP	1	804	178	7.71	19519	-	0.767726	Cluster3
TraesCS7D02G519200.1	7D	TraesCS7D02G519200	617116287	617116988	-	bZIP	1	702	196	6.91	21262.8	-	0.648101	Cluster3
TraesCS7D02G527500.1	7D	TraesCS7D02G527500	622544927	622548011	+	bZIP	3	1324	164	9.42	18035.4	-	0.711889	Cluster3
TraesCSU02G019200.1	Un	TraesCSU02G019200	20838633	20843392	+	bZIP	14	1626	345	5.96	36401.8	-	0.346948	Cluster1
TraesCS2A02G353900.1	2A	TraesCS2A02G353900	594579959	594581671	+	C2C2-CO-like	2	1608	316	5.56	33724.5	-	0.595391	Cluster5
TraesCS2B02G372000.1	2B	TraesCS2B02G372000	530306217	530307895	+	C2C2-CO-like	2	1579	319	5.56	33908.7	-	0.55594	Cluster5
TraesCS2D02G351900.1	2D	TraesCS2D02G351900	450234732	450236192	+	C2C2-CO-like	2	1357	319	5.56	33936.7	-	0.566907	Cluster5
TraesCS4A02G268500.1	4A	TraesCS4A02G268500	580733925	580736107	-	C2C2-CO-like	2	2065	410	5.85	44829.2	-	0.573012	Cluster5
TraesCS4B02G045700.1	4B	TraesCS4B02G045700	32896523	32898695	+	C2C2-CO-like	2	2066	411	6.04	44870.3	-	0.586411	Cluster5
TraesCS4D02G046200.1	4D	TraesCS4D02G046200	21774703	21776886	-	C2C2-CO-like	2	2065	410	5.85	44816.2	-	0.571728	Cluster5
TraesCS5A02G166100.1	5A	TraesCS5A02G166100	355071283	355072803	-	C2C2-CO-like	2	1301	326	5.78	35576.4	-	0.592347	Cluster5
TraesCS5B02G163500.1	5B	TraesCS5B02G163500	302753429	302754975	-	C2C2-CO-like	2	1303	325	5.96	35477.3	-	0.541839	Cluster5
TraesCS5D02G170700.1	5D	TraesCS5D02G170700	267762539	267764201	-	C2C2-CO-like	2	1429	325	5.96	35519.4	-	0.576591	Cluster5
TraesCS6A02G150900.1	6A	TraesCS6A02G150900	134947729	134949478	-	C2C2-CO-like	3	1571	364	5.68	37982.3	-	0.694946	Cluster5
TraesCS6A02G218900.1	6A	TraesCS6A02G218900	405166583	405168134	+	C2C2-CO-like	2	1465	321	5.24	33625.4	-	0.791274	Cluster6
TraesCS6A02G286400.1	6A	TraesCS6A02G286400	518666410	518670650	+	C2C2-CO-like	4	1811	323	6.65	35122.5	PO:0020094:plant egg cell	0.721336	Cluster6
TraesCS6A02G289400.1	6A	TraesCS6A02G289400	521451709	521454099	-	C2C2-CO-like	2	1425	369	5.91	41051.8	-	0.913789	Cluster1
TraesCS6A02G293200.1	6A	TraesCS6A02G293200	524718099	524720326	-	C2C2-CO-like	3	1984	426	6.81	46496.9	-	0.645318	Cluster3
TraesCS6B02G179000.1	6B	TraesCS6B02G179000	198984566	198986312	-	C2C2-CO-like	3	1564	374	5.28	38846.1	-	0.670115	Cluster5
TraesCS6B02G248400.1	6B	TraesCS6B02G248400	445852206	445853977	+	C2C2-CO-like	2	1681	321	5.34	33887.8	-	0.705781	Cluster6
TraesCS6B02G315400.1	6B	TraesCS6B02G315400	563320471	563324616	+	C2C2-CO-like	6	1771	390	4.96	42531.4	PO:0020094:plant egg cell	0.742135	Cluster6
TraesCS6B02G319500.1	6B	TraesCS6B02G319500	567397520	567399497	-	C2C2-CO-like	2	1386	370	5.58	41154.9	-	0.898167	Cluster6
TraesCS6B02G323400.1	6B	TraesCS6B02G323400	572391940	572393940	-	C2C2-CO-like	2	1923	428	6.4	46597.1	-	0.744141	Cluster2
TraesCS6D02G140900.1	6D	TraesCS6D02G140900	110442898	110444721	-	C2C2-CO-like	3	1644	364	5.68	38019.4	-	0.68775	Cluster5
TraesCS6D02G202000.1	6D	TraesCS6D02G202000	284849813	284850866	+	C2C2-CO-like	2	954	317	5.17	33352.1	-	0.747764	Cluster6
TraesCS6D02G267100.1	6D	TraesCS6D02G267100	377220309	377224969	+	C2C2-CO-like	5	2101	392	4.79	43027.9	PO:0020094:plant egg cell	0.765068	Cluster6
TraesCS6D02G269500.1	6D	TraesCS6D02G269500	379572086	379574125	+	C2C2-CO-like	2	1448	369	5.5	40998.7	-	0.855921	Cluster3
TraesCS6D02G274100.1	6D	TraesCS6D02G274100	382588127	382590143	-	C2C2-CO-like	2	1942	434	6.12	47026.5	-	0.809321	Cluster2
TraesCS7A02G206200.1	7A	TraesCS7A02G206200	168812422	168813720	+	C2C2-CO-like	1	1299	432	5.32	47132.2	-	0.841986	Cluster6
TraesCS7A02G218600.1	7A	TraesCS7A02G218600	185642724	185648145	-	C2C2-CO-like	5	2349	396	4.92	43615.4	PO:0020094:plant egg cell	0.538873	Cluster3
TraesCS7A02G497200.1	7A	TraesCS7A02G497200	686936894	686938479	+	C2C2-CO-like	2	1482	372	5.96	39566.6	-	0.641906	Cluster7
TraesCS7B02G113400.1	7B	TraesCS7B02G113400	131376607	131378427	+	C2C2-CO-like	1	1821	432	5.3	47173.2	-	0.843036	Cluster6
TraesCS7B02G400600.1	7B	TraesCS7B02G400600	667070044	667071768	-	C2C2-CO-like	2	1625	372	5.9	39407.5	-	0.635449	Cluster7
TraesCS7D02G209000.1	7D	TraesCS7D02G209000	167228163	167229829	+	C2C2-CO-like	1	1667	432	5.26	47125.2	-	0.833954	Cluster6
TraesCS7D02G220300.1	7D	TraesCS7D02G220300	180685905	180691434	-	C2C2-CO-like	5	2366	396	4.92	43609.3	PO:0020094:plant egg cell	0.440815	Cluster3
TraesCS7D02G484400.1	7D	TraesCS7D02G484400	594729348	594730950	-	C2C2-CO-like	2	1503	372	5.86	39527.6	-	0.616816	Cluster7
TraesCS1A02G035200.1	1A	TraesCS1A02G035200	18460513	18462491	-	C2C2-Dof	2	1694	361	8.72	37197.5	-	0.694532	Cluster1
TraesCS1A02G171300.1	1A	TraesCS1A02G171300	306149738	306151032	+	C2C2-Dof	1	1295	258	9.44	26135	-	0.861819	Cluster6
TraesCS1A02G275000.1	1A	TraesCS1A02G275000	469309603	469310929	+	C2C2-Dof	1	1327	316	5.3	33509.5	-	0.914082	Cluster6
TraesCS1A02G334100.1	1A	TraesCS1A02G334100	521738721	521739592	+	C2C2-Dof	1	872	209	9.6	22235.9	-	0.848854	Cluster4
TraesCS1B02G045000.1	1B	TraesCS1B02G045000	24931851	24933749	-	C2C2-Dof	2	1585	356	8.91	36341.6	-	0.747233	Cluster1
TraesCS1B02G185900.1	1B	TraesCS1B02G185900	332795666	332796460	-	C2C2-Dof	1	795	264	9.36	26541.5	-	0.877901	Cluster6
TraesCS1B02G284300.1	1B	TraesCS1B02G284300	493857647	493858919	+	C2C2-Dof	1	1273	316	5.39	33587.6	-	0.952659	Cluster6
TraesCS1B02G347400.1	1B	TraesCS1B02G347400	576521456	576522427	+	C2C2-Dof	1	972	209	9.6	22271	-	0.787444	Cluster5
TraesCS1D02G036700.1	1D	TraesCS1D02G036700	17167873	17169801	-	C2C2-Dof	2	1644	361	8.77	36962.2	-	0.718336	Cluster1
TraesCS1D02G274700.1	1D	TraesCS1D02G274700	370341818	370343206	+	C2C2-Dof	1	1389	377	6.45	40200.4	-	0.941884	Cluster6
TraesCS1D02G336600.1	1D	TraesCS1D02G336600	426651919	426652931	+	C2C2-Dof	1	1013	214	9.32	23009.8	-	0.880054	Cluster4
TraesCS2A02G079200.1	2A	TraesCS2A02G079200	35975801	35977086	+	C2C2-Dof	1	1286	326	9.11	32884.3	-	0.798076	Cluster5
TraesCS2A02G100800.1	2A	TraesCS2A02G100800	53786665	53790183	-	C2C2-Dof	2	1769	479	5.62	51035	-	0.432656	Cluster3
TraesCS2A02G225900.1	2A	TraesCS2A02G225900	232369515	232371140	-	C2C2-Dof	2	1539	356	7.69	35604.3	-	0.716551	Cluster4
TraesCS2A02G402200.1	2A	TraesCS2A02G402200	656239386	656242664	+	C2C2-Dof	2	2418	378	8.65	38347.6	-	0.731163	Cluster4
TraesCS2A02G590700.1	2A	TraesCS2A02G590700	778759935	778760958	+	C2C2-Dof	2	940	201	8.17	21704.2	-	0.902656	Cluster2
TraesCS2A02G590800.1	2A	TraesCS2A02G590800	778788878	778789786	+	C2C2-Dof	2	817	219	7.59	23619.1	-	0.732485	Cluster2
TraesCS2A02G591000.1	2A	TraesCS2A02G591000	778827013	778828353	+	C2C2-Dof	1	1341	249	8.08	26581.6	-	0.785778	Cluster2
TraesCS2A02G591100.1	2A	TraesCS2A02G591100	778876143	778877379	+	C2C2-Dof	2	1145	211	8.8	22463.1	-	0.770407	Cluster2
TraesCS2A02G591200.1	2A	TraesCS2A02G591200	778914463	778915949	+	C2C2-Dof	2	1382	214	6.12	22811.4	-	0.812177	Cluster2
TraesCS2B02G094000.1	2B	TraesCS2B02G094000	54440166	54441447	+	C2C2-Dof	1	1282	330	9.16	33272.8	-	0.823521	Cluster2
TraesCS2B02G118000.1	2B	TraesCS2B02G118000	81759951	81763276	-	C2C2-Dof	2	1744	479	5.88	50918	-	0.382761	Cluster3
TraesCS2B02G249200.1	2B	TraesCS2B02G249200	257522750	257524685	-	C2C2-Dof	2	1825	355	7.71	35679.3	-	0.719892	Cluster4
TraesCS2B02G420400.1	2B	TraesCS2B02G420400	602762399	602764394	+	C2C2-Dof	2	1131	376	8.65	38112.2	-	0.650814	Cluster6
TraesCS2B02G592600.1	2B	TraesCS2B02G592600	777520979	777522445	-	C2C2-Dof	2	1379	186	6.89	20074.2	-	0.676024	Cluster2
TraesCS2B02G592700.1	2B	TraesCS2B02G592700	777548469	777549764	-	C2C2-Dof	2	1214	222	5.93	23633.2	-	0.768071	Cluster2
TraesCS2B02G592800.1	2B	TraesCS2B02G592800	777617945	777619098	-	C2C2-Dof	3	993	212	6.88	23170.7	-	0.722326	Cluster5
TraesCS2B02G592900.1	2B	TraesCS2B02G592900	777658029	777659076	-	C2C2-Dof	2	958	207	8.11	22279.9	-	0.845786	Cluster2
TraesCS2D02G076600.1	2D	TraesCS2D02G076600	32763082	32764314	+	C2C2-Dof	1	1233	328	9.24	33038.5	-	0.846552	Cluster6
TraesCS2D02G100300.1	2D	TraesCS2D02G100300	52231309	52234913	-	C2C2-Dof	2	1763	501	6.27	53350.8	-	0.397678	Cluster3
TraesCS2D02G231600.1	2D	TraesCS2D02G231600	203448359	203452794	-	C2C2-Dof	1	4436	356	7.7	35712.4	-	0.682734	Cluster6
TraesCS2D02G399500.1	2D	TraesCS2D02G399500	512685274	512688454	+	C2C2-Dof	2	2300	378	8.65	38299.4	-	0.722385	Cluster4
TraesCS2D02G563000.1	2D	TraesCS2D02G563000	634481364	634482734	-	C2C2-Dof	2	1276	217	6.07	23217.7	-	0.682168	Cluster2
TraesCS2D02G563100.1	2D	TraesCS2D02G563100	634555464	634556903	-	C2C2-Dof	1	1440	225	6.57	23977.6	-	0.765284	Cluster2
TraesCS2D02G563200.1	2D	TraesCS2D02G563200	634574520	634575606	-	C2C2-Dof	2	995	221	8.17	23355.9	-	0.835966	Cluster2
TraesCS2D02G563400.1	2D	TraesCS2D02G563400	634658105	634658812	-	C2C2-Dof	2	624	207	8.5	22255.8	-	0.875421	Cluster2
TraesCS3A02G106500.1	3A	TraesCS3A02G106500	70730050	70730766	-	C2C2-Dof	1	717	238	9.41	25314.9	-	0.931033	Cluster6
TraesCS3A02G180600.1	3A	TraesCS3A02G180600	208246099	208249871	-	C2C2-Dof	2	2172	539	5.06	58121.6	-	0.641984	Cluster3
TraesCS3A02G189600.1	3A	TraesCS3A02G189600	234210384	234215073	+	C2C2-Dof	2	2179	476	7.14	51908.8	-	0.654365	Cluster1
TraesCS3A02G271700.1	3A	TraesCS3A02G271700	500978203	500979017	-	C2C2-Dof	1	815	155	10.46	16002.8	-	0.773139	Cluster4
TraesCS3A02G306800.1	3A	TraesCS3A02G306800	544969284	544970376	+	C2C2-Dof	1	1093	202	9.78	22051.6	-	0.751983	Cluster2
TraesCS3A02G377000.1	3A	TraesCS3A02G377000	626015567	626016881	-	C2C2-Dof	2	1251	331	4.68	35231.1	-	0.924051	Cluster6
TraesCS3A02G403500.1	3A	TraesCS3A02G403500	648694691	648700315	+	C2C2-Dof	10	2284	632	8.19	69615.2	-	0.794824	Cluster3
TraesCS3A02G532000.1	3A	TraesCS3A02G532000	744878729	744880838	+	C2C2-Dof	2	1906	372	8.63	38541	-	0.687203	Cluster1
TraesCS3A02G532100.1	3A	TraesCS3A02G532100	745079310	745083611	-	C2C2-Dof	3	1354	379	9.06	40996.8	-	0.99367	Cluster6
TraesCS3A02G532200.1	3A	TraesCS3A02G532200	745192588	745194589	-	C2C2-Dof	2	1362	355	8.36	38350.5	-	1	Cluster6
TraesCS3A02G539000.1	3A	TraesCS3A02G539000	750297982	750298791	-	C2C2-Dof	1	810	269	6.88	28739.7	-	-	#N/A
TraesCS3B02G125100.1	3B	TraesCS3B02G125100	99170508	99171851	-	C2C2-Dof	1	1344	230	9.21	24433.9	-	0.907113	Cluster1
TraesCS3B02G210300.1	3B	TraesCS3B02G210300	246160109	246164013	-	C2C2-Dof	3	2230	539	5.14	58134.6	-	0.559187	Cluster3
TraesCS3B02G305400.1	3B	TraesCS3B02G305400	490599899	490600363	-	C2C2-Dof	1	465	154	10.46	15885.6	-	0.858262	Cluster4
TraesCS3B02G329700.1	3B	TraesCS3B02G329700	532667075	532667689	-	C2C2-Dof	1	615	204	9.64	22194.8	-	0.817393	Cluster2
TraesCS3B02G409600.1	3B	TraesCS3B02G409600	646001994	646003382	-	C2C2-Dof	1	1389	331	4.68	35218.1	-	0.952656	Cluster6
TraesCS3B02G608800.1	3B	TraesCS3B02G608800	828110748	828112481	+	C2C2-Dof	2	1529	376	8.48	38766.1	-	0.63874	Cluster2
TraesCS3B02G608900.1	3B	TraesCS3B02G608900	828253028	828256218	-	C2C2-Dof	2	1225	355	8.91	37703	-	0.990508	Cluster6
TraesCS3B02G609000.1	3B	TraesCS3B02G609000	828292221	828293811	-	C2C2-Dof	2	1059	352	8.69	37649.5	-	-	#N/A
TraesCS3B02G609100.1	3B	TraesCS3B02G609100	828331215	828332801	-	C2C2-Dof	2	1044	347	6.95	36891.8	-	-	#N/A
TraesCS3D02G108600.1	3D	TraesCS3D02G108600	61702971	61703663	-	C2C2-Dof	1	693	230	9.38	24470	-	0.928237	Cluster6
TraesCS3D02G185500.1	3D	TraesCS3D02G185500	170680529	170682660	-	C2C2-Dof	2	1874	506	5.73	55026.6	-	0.699056	Cluster5
TraesCS3D02G193100.1	3D	TraesCS3D02G193100	183738273	183743302	+	C2C2-Dof	2	2211	476	6.54	51910.7	-	0.673665	Cluster1
TraesCS3D02G271300.1	3D	TraesCS3D02G271300	376169441	376170141	-	C2C2-Dof	1	701	152	10.46	15765.5	-	0.819634	Cluster4
TraesCS3D02G295100.1	3D	TraesCS3D02G295100	406771924	406773084	-	C2C2-Dof	1	1161	200	9.91	21803.3	-	0.653816	Cluster6
TraesCS3D02G370100.1	3D	TraesCS3D02G370100	483176431	483177426	-	C2C2-Dof	1	996	331	4.66	35228	-	0.921061	Cluster6
TraesCS3D02G537400.1	3D	TraesCS3D02G537400	610543334	610545124	+	C2C2-Dof	2	1588	376	8.48	38634	-	0.551208	Cluster1
TraesCS3D02G537500.1	3D	TraesCS3D02G537500	610627454	610629359	-	C2C2-Dof	2	1149	382	8.86	41600.8	-	-	#N/A
TraesCS4A02G017700.1	4A	TraesCS4A02G017700	11716257	11718716	-	C2C2-Dof	2	1791	437	8.15	47272.7	PO:0009015:portion of vascular tissue	0.613368	Cluster3
TraesCS4A02G097800.1	4A	TraesCS4A02G097800	108871081	108873133	-	C2C2-Dof	2	1828	383	9.42	39721.1	-	0.610544	Cluster5
TraesCS4A02G234000.1	4A	TraesCS4A02G234000	542828046	542828846	+	C2C2-Dof	1	801	266	9.46	28043.9	-	0.915939	Cluster1
TraesCS4B02G081500.1	4B	TraesCS4B02G081500	79736893	79738073	-	C2C2-Dof	1	1181	265	9.3	27851.7	-	0.854718	Cluster1
TraesCS4B02G206800.1	4B	TraesCS4B02G206800	440046049	440047909	+	C2C2-Dof	2	1628	378	9.5	39349.8	-	0.643556	Cluster5
TraesCS4B02G286400.1	4B	TraesCS4B02G286400	570084740	570086809	+	C2C2-Dof	3	1302	433	8.45	46778.3	PO:0009015:portion of vascular tissue	0.640723	Cluster3
TraesCS4D02G080100.1	4D	TraesCS4D02G080100	54126623	54127674	-	C2C2-Dof	1	1052	263	9.27	27719.5	-	0.860037	Cluster1
TraesCS4D02G207600.1	4D	TraesCS4D02G207600	356561639	356563671	+	C2C2-Dof	2	1808	381	9.62	39471.9	-	0.396693	Cluster3
TraesCS4D02G285100.1	4D	TraesCS4D02G285100	455891843	455894496	+	C2C2-Dof	2	2005	442	8.15	47616.1	PO:0009015:portion of vascular tissue	0.571186	Cluster3
TraesCS5A02G078100.1	5A	TraesCS5A02G078100	95868213	95870168	+	C2C2-Dof	2	1693	342	8.91	35270.2	-	0.755363	Cluster1
TraesCS5A02G155900.1	5A	TraesCS5A02G155900	334262255	334266121	-	C2C2-Dof	3	1478	338	8.09	34784.6	-	0.870644	Cluster2
TraesCS5A02G251800.1	5A	TraesCS5A02G251800	467585704	467586549	+	C2C2-Dof	1	846	281	4.89	28691.4	PO:0003015:primary root differentiation zone, PO:0006203:pericycle, PO:0025257:primary root elongation zone, PO:0005417:phloem	0.677065	Cluster2
TraesCS5A02G401800.1	5A	TraesCS5A02G401800	594770622	594772285	+	C2C2-Dof	1	1664	381	9.42	39465.5	-	0.871495	Cluster1
TraesCS5A02G479400.1	5A	TraesCS5A02G479400	652646583	652649051	+	C2C2-Dof	2	2214	467	9.43	47909.6	-	0.791038	Cluster1
TraesCS5B02G087600.1	5B	TraesCS5B02G087600	112193647	112195644	-	C2C2-Dof	2	1730	340	8.91	34928.8	-	0.79758	Cluster1
TraesCS5B02G154100.1	5B	TraesCS5B02G154100	283623197	283625483	-	C2C2-Dof	2	1017	338	8.78	35207.2	-	0.866107	Cluster2
TraesCS5B02G249800.1	5B	TraesCS5B02G249800	432323196	432324541	+	C2C2-Dof	1	1346	281	4.93	28843.7	PO:0003015:primary root differentiation zone, PO:0006203:pericycle, PO:0025257:primary root elongation zone, PO:0005417:phloem	0.671076	Cluster2
TraesCS5B02G406500.1	5B	TraesCS5B02G406500	582773379	582774988	+	C2C2-Dof	1	1610	382	9.42	39508.6	-	0.892629	Cluster1
TraesCS5B02G492600.1	5B	TraesCS5B02G492600	660588862	660590474	+	C2C2-Dof	2	1359	452	9.3	46274	-	0.585208	Cluster5
TraesCS5D02G093800.1	5D	TraesCS5D02G093800	103174870	103176978	-	C2C2-Dof	2	1836	343	8.91	35422.3	-	0.779872	Cluster1
TraesCS5D02G161000.1	5D	TraesCS5D02G161000	251063289	251065090	-	C2C2-Dof	2	1029	342	8.59	35466.5	-	0.851148	Cluster2
TraesCS5D02G259700.1	5D	TraesCS5D02G259700	365992278	365993596	+	C2C2-Dof	1	1319	281	4.86	28857.5	PO:0003015:primary root differentiation zone, PO:0006203:pericycle, PO:0025257:primary root elongation zone, PO:0005417:phloem	0.662217	Cluster2
TraesCS5D02G412000.1	5D	TraesCS5D02G412000	475381968	475383543	+	C2C2-Dof	1	1576	380	9.33	39261.3	-	0.91321	Cluster1
TraesCS5D02G493000.1	5D	TraesCS5D02G493000	525956912	525959376	+	C2C2-Dof	2	2211	455	9.3	46474.1	-	0.694944	Cluster3
TraesCS6A02G255500.1	6A	TraesCS6A02G255500	473574178	473576966	-	C2C2-Dof	2	1860	392	8.45	40234.4	-	0.81205	Cluster4
TraesCS6A02G274000.1	6A	TraesCS6A02G274000	500082728	500086672	-	C2C2-Dof	2	1634	306	8.05	32636.9	-	0.807015	Cluster1
TraesCS6A02G287700.1	6A	TraesCS6A02G287700	520354982	520355857	-	C2C2-Dof	1	876	291	5.57	30383.7	-	0.646775	Cluster6
TraesCS6B02G270100.1	6B	TraesCS6B02G270100	486223323	486226417	+	C2C2-Dof	2	2176	389	8.45	40120.3	-	0.847349	Cluster4
TraesCS6B02G301500.1	6B	TraesCS6B02G301500	539726677	539730641	-	C2C2-Dof	2	1606	306	8.32	32490.8	-	0.793709	Cluster6
TraesCS6B02G317100.1	6B	TraesCS6B02G317100	564992535	564993867	-	C2C2-Dof	1	1333	289	5.92	30305.7	-	0.66404	Cluster5
TraesCS6D02G236700.1	6D	TraesCS6D02G236700	334225902	334229145	-	C2C2-Dof	2	2311	391	8.45	40049.2	-	0.80158	Cluster4
TraesCS6D02G254200.1	6D	TraesCS6D02G254200	358325152	358328745	-	C2C2-Dof	2	1262	306	8.32	32457.8	-	0.867621	Cluster6
TraesCS6D02G268400.1	6D	TraesCS6D02G268400	378378366	378379721	-	C2C2-Dof	1	1356	290	5.91	30212.5	-	0.599055	Cluster5
TraesCS7A02G213400.1	7A	TraesCS7A02G213400	177135900	177137449	+	C2C2-Dof	1	1550	284	6.81	29147.2	-	0.864679	Cluster6
TraesCS7B02G120600.1	7B	TraesCS7B02G120600	140652691	140653986	+	C2C2-Dof	1	1296	319	8.62	32924.5	-	0.92365	Cluster6
TraesCS7D02G215300.1	7D	TraesCS7D02G215300	174992358	174993734	+	C2C2-Dof	1	1377	284	6.71	29018.1	-	0.918463	Cluster6
TraesCS1A02G097300.1	1A	TraesCS1A02G097300	93401939	93403931	-	C2C2-GATA	3	480	159	9.3	17489.6	PO:0006036:root epidermis, PO:0005352:xylem, PO:0000036:leaf vascular system, PO:0006203:pericycle, PO:0020139:leaf midvein	0.621539	Cluster3
TraesCS1A02G144400.1	1A	TraesCS1A02G144400	250201587	250203016	-	C2C2-GATA	3	1267	288	9.64	32348.8	-	0.829682	Cluster5
TraesCS1A02G221600.1	1A	TraesCS1A02G221600	390708277	390710135	+	C2C2-GATA	2	1718	349	6.85	36867.2	-	0.839662	Cluster6
TraesCS1A02G285100.1	1A	TraesCS1A02G285100	482376030	482377174	-	C2C2-GATA	1	1145	304	6.71	32162.6	-	1	Cluster6
TraesCS1A02G340900.1	1A	TraesCS1A02G340900	530780002	530782491	+	C2C2-GATA	2	1937	387	5.45	39932.6	-	0.667179	Cluster2
TraesCS1A02G418200.1	1A	TraesCS1A02G418200	575671966	575673602	+	C2C2-GATA	2	1550	219	8.48	23297.8	-	0.916225	Cluster1
TraesCS1B02G126600.1	1B	TraesCS1B02G126600	155404645	155406696	+	C2C2-GATA	3	1157	146	9.46	16077	PO:0006036:root epidermis, PO:0005352:xylem, PO:0000036:leaf vascular system, PO:0006203:pericycle, PO:0020139:leaf midvein	0.746907	Cluster2
TraesCS1B02G161800.1	1B	TraesCS1B02G161800	279191940	279193491	-	C2C2-GATA	3	1389	285	9.33	31706	-	0.81457	Cluster1
TraesCS1B02G234800.1	1B	TraesCS1B02G234800	420684511	420686245	+	C2C2-GATA	2	1586	357	7.03	37531.8	-	0.83641	Cluster6
TraesCS1B02G353700.1	1B	TraesCS1B02G353700	583759253	583761334	+	C2C2-GATA	2	1719	400	5.91	41602.3	-	0.684166	Cluster2
TraesCS1B02G448200.1	1B	TraesCS1B02G448200	667619947	667621006	+	C2C2-GATA	2	973	217	8.11	23109.7	-	0.924919	Cluster1
TraesCS1D02G106100.1	1D	TraesCS1D02G106100	97922255	97924399	-	C2C2-GATA	3	1257	146	9.62	16100	PO:0006036:root epidermis, PO:0005352:xylem, PO:0000036:leaf vascular system, PO:0006203:pericycle, PO:0020139:leaf midvein	0.692732	Cluster2
TraesCS1D02G143500.1	1D	TraesCS1D02G143500	199072865	199073839	-	C2C2-GATA	2	885	294	9.67	32777.3	-	0.926454	Cluster1
TraesCS1D02G223200.1	1D	TraesCS1D02G223200	310814772	310816493	-	C2C2-GATA	2	1573	357	6.87	37424.7	-	0.849099	Cluster6
TraesCS1D02G284100.1	1D	TraesCS1D02G284100	382256849	382258109	-	C2C2-GATA	1	1261	322	6.55	34071.7	-	1	Cluster6
TraesCS1D02G343000.1	1D	TraesCS1D02G343000	432318333	432320633	+	C2C2-GATA	2	1936	383	5.8	39641.3	-	0.682205	Cluster2
TraesCS1D02G425900.1	1D	TraesCS1D02G425900	479358211	479359875	+	C2C2-GATA	2	1553	219	8.16	23317.8	-	0.894776	Cluster1
TraesCS2A02G388300.1	2A	TraesCS2A02G388300	635510487	635513888	+	C2C2-GATA	3	3095	432	6.29	46270.7	-	0.424517	Cluster1
TraesCS2A02G391700.1	2A	TraesCS2A02G391700	641957351	641961915	-	C2C2-GATA	6	2369	441	7.2	48058.9	-	0.509719	Cluster3
TraesCS2A02G520600.1	2A	TraesCS2A02G520600	743385236	743386120	+	C2C2-GATA	1	885	294	8.69	31357	-	0.921789	Cluster5
TraesCS2A02G561200.1	2A	TraesCS2A02G561200	763024413	763026599	-	C2C2-GATA	3	1043	195	9.33	21375.2	-	0.785192	Cluster1
TraesCS2A02G561300.1	2A	TraesCS2A02G561300	763044792	763047797	+	C2C2-GATA	6	1353	450	6.51	48779.9	-	0.55834	Cluster3
TraesCS2A02G561400.1	2A	TraesCS2A02G561400	763050709	763053311	+	C2C2-GATA	4	1356	313	9.37	33857.5	-	0.808347	Cluster1
TraesCS2B02G406400.1	2B	TraesCS2B02G406400	575835130	575837599	+	C2C2-GATA	3	2159	425	6.51	45720.3	-	0.391918	Cluster2
TraesCS2B02G410200.1	2B	TraesCS2B02G410200	583678957	583683087	-	C2C2-GATA	6	1986	429	7.58	46864.5	-	0.554246	Cluster1
TraesCS2B02G618400.1	2B	TraesCS2B02G618400	794493930	794496720	-	C2C2-GATA	5	1591	362	9.54	38997.9	-	1	Cluster1
TraesCS2B02G618500.1	2B	TraesCS2B02G618500	794500736	794504405	-	C2C2-GATA	6	1864	450	6.51	48799	-	0.57836	Cluster1
[truncated: 4,025 more rows]

## Sheet: Table 2
Table S2. Characteristics of TF genes.
Group	Gene structure							Number of TF genes on the subgenomes					Number of homeologous groups									Hypergeometric test of each TF family in each Cluster (P < 0.05)
	transcript number	exon number	Transcript length	cDNA length	Protein length	3'UTR length	5'UTR length	A	B	D	Un	Total	1:1:1	N:0:0	0:N:0	0:0:N	N:N:0	N:0:N	0:N:N	N:N:N	Total	Cluster1	Cluster2	Cluster3	Cluster4	Cluster5	Cluster6	Cluster7
Non-TF	1.23927	5.67	3995.04	1706.26	446.56	345.806	191.513	35345	35643	34212	2691	107891	872	10	3	0	43	91	57	370	1446	-	-	-	-	-	-	-
TF	1.24556	3.71248	2918.58	1460.9	357.169	326.518	195.855	2002	1977	1984	60	6023	-	-	-	-	-	-	-	-	-	-	-	-	-	-	-	-
Each Family
Alfin-like	1.47059	5	6072.71	1355.88	254.412	345.941	243.706	5	6	6	0	17	5	0	0	0	0	0	1	0	6	1.98138e-06	0.162693	-	-	-	-	-
AP2/ERF-AP2	1.3871	8.03226	3888.13	1862.58	482.548	322.939	206.723	20	20	22	0	62	13	0	0	0	1	4	4	0	22	1.9595e-05	0.0579901	0.115105	0.0130666	0.0682284	0.113307	0.12524
AP2/ERF-ERF	1.04	1.47579	1377.11	1087.49	263.743	297.689	156.31	150	159	165	1	475	68	0	0	0	3	2	4	34	111	3.16556e-12	0.0192192	1.65837e-10	1.44839e-31	0.00806051	0.0332744	0.000566989
AP2/ERF-RAV	1	1.11538	1543.65	1435.04	372.154	295	128.056	7	8	9	2	26	3	0	0	0	0	1	0	2	6	0.0433905	0.192325	0.230013	0.109864	0.153329	0.0771176	3.57076e-05
B3	1.25231	4.32639	2350.84	1217.24	329.817	273.05	183.372	141	147	141	3	432	33	1	0	0	5	11	5	23	78	4.16947e-20	0.0132786	4.52837e-05	4.08844e-08	3.07696e-07	1.39526e-08	0.00709139
B3-ARF	1.91045	10.7463	5627.73	3084.16	798.567	425.694	368.547	23	21	23	0	67	4	1	0	0	0	1	0	6	12	0.0308178	0.0196338	0.00138604	0.00178851	0.0394343	0.124586	-
BES1	1.4	3.75	3238.75	1716.6	388.2	559.867	161.375	6	7	6	1	20	5	0	0	0	0	0	0	1	6	0.0723892	0.209887	0.257786	-	0.195797	0.0928317	-
bHLH	1.27292	4.25625	2949.55	1393.23	328.052	322.438	202.433	154	167	148	11	480	75	1	0	0	3	3	3	33	118	0.0052711	3.95437e-05	0.000223199	0.0402743	0.0290067	1.06153e-10	0.0173316
bZIP	1.47308	4.9	3482.51	1406.42	307.577	341.827	250.386	90	84	85	1	260	54	1	0	0	2	3	1	10	71	0.0336302	0.00771678	3.07976e-05	2.27578e-06	0.025284	0.00978748	0.010816
C2C2-CO-like	1.375	2.5	2255.59	1673.59	372.719	400.414	202.2	11	10	11	0	32	0	0	1	0	0	1	0	2	4	0.00353757	0.0667536	0.207418	-	3.32158e-05	0.0363671	0.0899514
C2C2-Dof	1.08	1.72	1920.12	1432.66	326.61	372.494	200.149	36	33	31	0	100	20	0	1	0	1	2	0	3	27	0.0820967	0.0285352	0.0997074	0.12288	0.127024	0.0547551	-
C2C2-GATA	1.22785	3.35443	2427.8	1499.39	328.696	355.478	261.857	29	25	25	0	79	8	0	0	0	0	1	0	8	17	1.11765e-06	0.0695189	0.0254083	-	0.133561	0.0276524	-
C2C2-LSD	1.92308	5.84615	4190.15	1419.62	261.538	479.636	245	4	4	5	0	13	1	0	0	0	0	1	1	1	4	0.24984	-	0.161555	-	0.000924312	-	0.0745561
C2C2-YABBY	2.14286	6.66667	4275.62	1286.76	225.238	343.474	328.579	7	7	7	0	21	7	0	0	0	0	0	0	0	7	0.143993	0.236179	-	-	-	0.000447698	-
C2H2	1.10699	2.45852	2321.57	1293.29	332.157	305.319	176.137	149	149	151	9	458	64	1	0	0	4	8	3	31	111	0.0301985	0.0527746	0.0411169	1.39215e-08	0.0291171	0.0265324	0.00393322
C3H	1.54305	5.41722	4663.72	1948.52	496.728	396.373	158.092	52	50	49	0	151	26	0	0	0	1	2	1	9	39	1.51473e-10	0.0875879	5.41423e-06	-	0.0123315	7.93939e-07	0.096158
CAMTA	3.8125	12.5625	11004.8	3782.88	1008	432.438	345	6	5	5	0	16	3	0	0	0	0	1	0	1	5	-	-	8.40017e-15	-	-	-	-
CPP	1.26316	7.68421	4228.71	1656.82	413.132	310.6	238.148	11	14	13	0	38	5	0	0	0	1	0	1	3	10	4.68224e-06	0.175334	0.180726	-	0.0705482	0.121918	-
E2F-DP	1.62963	11.1852	6299.85	1634.96	389	325.846	177.478	9	9	9	0	27	5	0	0	0	0	0	0	2	7	2.99336e-12	0.208681	-	-	-	-	-
EIL	1	1.85714	2286.52	1957.29	544.524	251.857	246.846	6	7	7	1	21	6	0	0	0	0	0	1	0	7	0.208057	-	0.240179	0.22959	0.205027	-	5.17876e-07
GARP-ARR-B	1.26667	6.23333	4991.53	2409.07	611.433	310.679	301.929	11	10	9	0	30	2	0	0	0	0	0	0	2	4	0.166315	0.100022	0.000194972	-	0.182442	-	-
GARP-G2-like	1.4726	5.70548	3505.84	1521.12	365.705	314.235	204.008	48	49	48	1	146	29	0	0	0	0	0	0	9	38	0.00246472	0.0574142	4.16001e-10	4.83725e-05	0.000879891	0.0450168	0.163727
GeBP	1	1.77778	2321.19	1445.25	369.194	351.923	115.92	10	13	13	0	36	3	0	0	0	0	0	0	3	6	6.66884e-09	0.143819	0.0321281	-	0.167013	0.0184601	-
GRAS	1.06077	1.79558	2647.61	2170.59	600.354	363.541	252.311	62	55	63	1	181	28	0	0	0	0	4	1	13	46	0.0631754	0.0210406	0.000167803	0.0638984	0.00436272	7.73033e-05	0.00562587
GRF	1.2	3.53333	2605.5	1485.8	358.233	297.444	162	12	8	10	0	30	1	1	0	0	0	1	0	3	6	0.025794	0.0831753	0.141313	-	0.182442	0.0107519	-
HB-BELL	1.05556	4.75	4752.42	2423.28	593.833	392.875	336.258	13	11	12	0	36	3	0	0	0	0	1	0	2	6	0.0228628	0.0914249	8.43379e-05	-	0.000120178	0.0487175	0.351936
HB-HD-ZIP	1.36036	6.87387	3612.71	2157.44	511.225	435.456	247.969	38	35	37	1	111	26	0	0	0	0	1	0	3	30	0.075117	0.0279705	1.68803e-05	0.0211405	0.00863804	0.000210603	0.125577
HB-KNOX	1.34375	5.40625	6063.12	1462.81	323.531	369.75	182.828	11	11	10	0	32	0	0	0	0	0	0	0	2	2	0.0152371	-	0.186212	-	0.202967	5.16075e-08	0.0899514
HB-other	1.47692	6.58462	3928.26	1748.31	477.631	312.894	147.395	20	22	21	2	65	1	2	0	0	1	0	3	5	12	0.024484	0.00652138	0.0397803	-	-	0.0804675	0.261406
HB-PHD	2.22222	10.6667	7161	3350.22	930.333	455.714	302.667	3	3	3	0	9	3	0	0	0	0	0	0	0	3	0.0225192	-	0.0838693	-	-	-	0.252734
HB-WOX	1	2.5814	2312.86	1233.4	300.163	263.342	116.083	15	13	14	1	43	7	0	0	0	0	0	0	3	10	7.91105e-07	0.163244	0.0455681	-	0.0463265	0.155107	-
HRT	1	3	3073.5	2074.5	549	248.5	176	1	0	1	0	2	0	0	0	0	0	1	0	0	1	0.339316	-	0.230646	-	-	-	-
HSF	1.20513	2.32051	2643.71	1506.72	350.064	328.662	194.418	27	27	22	2	78	11	0	0	0	1	1	0	5	18	0.0174082	0.115396	0.01295	0.130795	0.0464002	0.0302147	0.00682362
LFY	1	3	3607.33	1504	392	209.667	115.333	1	1	1	0	3	1	0	0	0	0	0	0	0	1	0.01013	-	-	-	-	-	-
LIM	1.23529	5.05882	2588.06	1569.59	385.706	271.6	192.467	5	6	6	0	17	5	0	0	0	0	0	1	0	6	0.000784585	-	0.217228	-	-	0.198734	-
LOB	1.02222	1.98889	1519.08	1085.03	246.256	267.382	151.043	31	29	29	1	90	15	0	0	0	2	1	0	5	23	0.0501626	0.0117752	0.00105987	0.0919307	0.000568502	0.101151	0.105082
MADS-MIKC	1.52	7.648	7523.19	1117.74	234.2	319.02	187.388	40	41	44	0	125	13	0	0	0	0	1	1	11	26	6.97721e-06	5.4293e-07	0.104167	0.000388136	0.0263671	0.00104576	0.151739
MADS-M-type	1.01923	2.04487	3786.42	833.917	247.763	172.362	132.595	48	58	48	2	156	9	0	0	0	3	4	4	10	30	1.38513e-05	0.0620537	0.000425761	0.0553198	0.0177472	0.018515	0.00413207
MYB	1.15581	3.05116	2584.46	1446.35	347.579	296.69	173.164	144	138	147	1	430	76	1	0	0	5	6	2	22	112	2.46071e-06	0.00699758	0.00305273	1.20775e-12	0.0058556	0.0010727	4.84804e-07
MYB-related	1.47807	4.41667	2999.16	1385.45	331.482	323.989	179.446	76	75	77	0	228	34	0	0	0	1	4	4	13	56	0.000887507	0.0010454	2.37883e-09	0.00258055	0.0864437	0.0160817	0.0981624
NAC	1.21663	3.08534	2527.92	1510.5	368.604	334.104	185.721	158	147	143	9	457	59	1	1	0	4	10	9	31	115	8.19904e-07	0.0429125	0.019219	0.000369825	4.15441e-05	0.00178142	0.0786886
NF-X1	1.28571	6.71429	4898.86	3566.14	936	881.6	175.6	2	3	2	0	7	0	0	0	0	0	0	0	1	1	0.133836	-	0.0464526	-	0.375387	-	-
NF-YA	1.36842	6.15789	3873.95	1420.47	274.526	385.833	255.235	6	6	7	0	19	5	0	0	0	0	1	1	0	7	1.63383e-06	-	0.232751	0.230911	0.277751	-	-
NF-YB	1.21277	2.7234	1715.32	962	214.851	285.657	140.618	17	14	13	3	47	4	0	0	0	0	2	0	4	10	0.00172334	0.0582951	0.00864652	0.0506371	0.0867127	0.125885	0.164203
NF-YC	1.02381	2.42857	3089.62	1129.95	248.119	278.088	194.529	13	15	14	0	42	5	0	0	0	1	0	0	4	10	0.000116476	0.136153	0.134837	0.138004	0.11895	0.00717891	-
OFP	1	1.06	1158.42	1153.29	274.7	285.757	150.961	33	32	33	2	100	23	0	0	0	0	1	0	4	28	0.0970906	0.0018148	8.73177e-06	0.0941708	-	0.000262214	0.0786037
PLATZ	1.06522	3.56522	2098.39	1044.13	229.413	359.062	163.552	16	14	16	0	46	5	0	0	0	0	0	0	4	9	0.128278	0.0146749	0.076851	-	0.0522066	0.0319898	-
RWP-RK	1.2973	4.78378	4010.41	2159.65	575.432	350.08	298.917	14	12	11	0	37	3	0	0	0	0	1	0	3	7	0.00461303	0.136168	0.00011784	-	0.158391	-	0.347817
S1Fa-like	1.33333	2.33333	1237.67	340.667	78.3333	174	134	1	1	1	0	3	1	0	0	0	0	0	0	0	1	-	0.00412771	-	-	-	-	-
SBP	1.33929	4.83929	4886.8	2015.32	502.268	300.588	270.396	19	18	19	0	56	11	0	0	0	0	0	0	3	14	0.00013041	0.00303401	0.0555728	-	0.0960731	8.93453e-16	-
SRS	1.06667	2.6	2603.13	1894.33	327.133	807.333	330.083	5	5	5	0	15	5	0	0	0	0	0	0	0	5	0.00558247	0.230854	-	-	-	0.17284	-
STAT	3.33333	12	5555.33	2479	714.333	285.667	47.3333	1	1	1	0	3	1	0	0	0	0	0	0	0	1	0.110147	-	0.300001	-	-	-	-
TCP	1.01639	1.77049	2164.66	1450.39	318.639	387.627	226.911	20	21	20	0	61	7	0	0	0	0	0	0	7	14	0.0181639	0.0942604	-	0.00350977	0.11698	1.62258e-11	0.211285
Tify	1.07273	3.16364	1767.16	1100.96	209.836	293.294	216.14	18	19	16	2	55	5	0	0	0	0	0	1	3	9	0.00815713	0.000669439	0.00320229	6.80681e-21	0.0549197	0.000128058	0.27608
Trihelix	1.39535	2.95349	3025.52	1857.66	435.349	387.699	255.122	28	30	27	1	86	14	0	0	0	2	0	2	5	23	0.086424	0.00196247	0.106616	0.081318	0.0970747	0.0964073	0.117608
VOZ	1.83333	4.5	5236	3424.5	539.833	1139.33	662.667	2	2	2	0	6	0	0	0	0	0	0	0	1	1	0.265073	0.192049	0.149923	-	-	-	-
Whirly	1	7.33333	4328	1275.5	249.5	436.667	87.3333	3	1	2	0	6	0	0	0	0	0	0	0	1	1	0.000102063	-	-	-	-	-	-
WRKY	1.19865	3.13805	2889.35	1460.43	359.303	287.189	152.123	100	87	109	1	297	49	0	0	0	0	10	3	16	78	4.97277e-17	6.62045e-06	0.0649727	6.20419e-14	7.32756e-10	0.00293239	5.53635e-07
zf-HD	1	1.24324	1309.54	1035.97	254.865	356.611	206.529	14	12	10	1	37	3	0	0	0	2	0	0	3	8	0.124323	0.0163277	-	-	-	0.00121281	0.0390546

## Sheet: Table 3
Table S3. dN/dS ratios of TF genes between wheat and its progenitors.
Wheat TF	Orthologous	Species	t	S	N	dN/dS	dN	dS	Time (Mya)
TraesCS1A02G004500.1	TRIUR326093-P1	T. urartu	0.22	269.8	738.2	0.7234	0.0665	0.092	7.07692
TraesCS1A02G018900.1	TRIUR301525-P1	T. urartu	0.385	240.7	899.3	0.5823	0.1115	0.1914	14.7231
TraesCS1A02G021500.1	TRIUR305136-P1	T. urartu	0.1617	242.9	762.1	0.2725	0.0328	0.1203	9.25385
TraesCS1A02G030200.1	TRIUR300725-P1	T. urartu	0.3489	571.7	1555.3	0.7383	0.1062	0.1438	11.0615
TraesCS1A02G030300.1	TRIUR300728-P1	T. urartu	0.0217	680.3	1437.7	1.2879	0.0078	0.0061	0.469231
TraesCS1A02G039100.1	TRIUR328877-P1	T. urartu	0.0131	509.6	1326.4	2.5395	0.0053	0.0021	0.161538
TraesCS1A02G040100.1	TRIUR311899-P1	T. urartu	0.0119	110	397	0.2714	0.0025	0.0092	0.707692
TraesCS1A02G040300.1	TRIUR304728-P1	T. urartu	0.2056	102.4	464.6	0.4671	0.0568	0.1216	9.35385
TraesCS1A02G042700.1	TRIUR334187-P1	T. urartu	0.1924	90.2	527.8	0.7153	0.0606	0.0847	6.51538
TraesCS1A02G052000.1	TRIUR316981-P1	T. urartu	0.1239	64.5	421.5	0.401	0.0345	0.086	6.61538
TraesCS1A02G058400.1	TRIUR314819-P1	T. urartu	0.6601	206.2	774.8	1.0248	0.2212	0.2158	16.6
TraesCS1A02G060200.1	TRIUR312142-P1	T. urartu	0.0123	127.3	862.7	0.4459	0.0035	0.0079	0.607692
TraesCS1A02G070400.1	TRIUR302376-P1	T. urartu	0.0266	162	981	1.3436	0.0092	0.0069	0.530769
TraesCS1A02G072700.1	TRIUR325015-P1	T. urartu	0.0069	152.9	744.1	0.198	0.0014	0.0069	0.530769
TraesCS1A02G072800.1	TRIUR334593-P1	T. urartu	0.1576	93.6	623.4	0.2345	0.0368	0.157	12.0769
TraesCS1A02G075800.1	TRIUR326890-P1	T. urartu	0.0073	485.1	1191.9	0.3922	0.0017	0.0043	0.330769
TraesCS1A02G076200.1	TRIUR313477-P1	T. urartu	0.158	138.6	716.4	0.3644	0.041	0.1127	8.66923
TraesCS1A02G094300.1	TRIUR328165-P1	T. urartu	0.0493	368.8	888.2	1.6733	0.0186	0.0111	0.853846
TraesCS1A02G096300.1	TRIUR322435-P1	T. urartu	0.0263	243.1	680.9	0.3629	0.006	0.0165	1.26923
TraesCS1A02G096800.1	TRIUR311880-P1	T. urartu	0.0657	335.3	939.7	0.8528	0.0209	0.0246	1.89231
TraesCS1A02G107700.1	TRIUR324634-P1	T. urartu	0.0396	118.8	499.2	0.3957	0.0102	0.0258	1.98462
TraesCS1A02G110400.1	TRIUR312818-P1	T. urartu	0.0143	132.9	503.1	0.5298	0.004	0.0076	0.584615
TraesCS1A02G111700.1	TRIUR318328-P1	T. urartu	0.0246	77.1	306.9	0.1165	0.0033	0.0279	2.14615
TraesCS1A02G128800.1	TRIUR328753-P1	T. urartu	0.1829	180.1	461.9	0.8406	0.0579	0.0689	5.3
TraesCS1A02G129300.1	TRIUR327706-P1	T. urartu	0.2062	564.6	1961.4	0.5153	0.0568	0.1102	8.47692
TraesCS1A02G139700.1	TRIUR333333-P1	T. urartu	0.1601	251.9	789.1	1.0487	0.054	0.0515	3.96154
TraesCS1A02G140000.1	TRIUR320025-P1	T. urartu	0.207	38.9	246.1	0.1181	0.0342	0.2893	22.2538
TraesCS1A02G155300.1	TRIUR331731-P1	T. urartu	0.0198	89.4	528.6	0.4749	0.0057	0.012	0.923077
TraesCS1A02G176300.1	TRIUR327479-P1	T. urartu	0.5637	176.3	642.7	0.5343	0.1582	0.2961	22.7769
TraesCS1A02G176700.1	TRIUR333328-P1	T. urartu	0.3897	374.3	1638.7	0.5054	0.1099	0.2175	16.7308
TraesCS1A02G192100.1	TRIUR320025-P1	T. urartu	0.2395	44.9	240.1	0.1347	0.0397	0.2946	22.6615
TraesCS1A02G193200.1	TRIUR332014-P1	T. urartu	0.081	139	980	0.3572	0.0221	0.0618	4.75385
TraesCS1A02G193400.1	TRIUR319363-P1	T. urartu	0.0857	477.9	2003.1	0.542	0.0246	0.0453	3.48462
TraesCS1A02G197400.1	TRIUR303769-P1	T. urartu	0.0147	210	816	0.3814	0.0037	0.0097	0.746154
TraesCS1A02G199900.1	TRIUR332699-P1	T. urartu	0.2561	160.7	520.3	0.6372	0.0753	0.1181	9.08462
TraesCS1A02G211800.1	TRIUR329692-P1	T. urartu	0.0118	58.4	469.6	0.1163	0.0021	0.0184	1.41538
TraesCS1A02G212700.1	TRIUR325332-P1	T. urartu	0.1335	55	392	0.2256	0.0313	0.1386	10.6615
TraesCS1A02G219400.1	TRIUR306499-P1	T. urartu	0.3838	204.7	596.3	0.6834	0.1144	0.1674	12.8769
TraesCS1A02G221900.1	TRIUR317409-P1	T. urartu	0.0686	323.9	759.1	0.9702	0.0227	0.0233	1.79231
TraesCS1A02G242800.1	TRIUR307433-P1	T. urartu	0.0117	299.9	759.1	0.1269	0.0013	0.0104	0.8
TraesCS1A02G252600.1	TRIUR311737-P1	T. urartu	0.0201	106.7	505.3	0.6172	0.006	0.0098	0.753846
TraesCS1A02G255300.1	TRIUR320168-P1	T. urartu	0.1371	418	1577	1.3103	0.0481	0.0367	2.82308
TraesCS1A02G258100.1	TRIUR302784-P1	T. urartu	0.0168	345.2	1124.8	0.2924	0.0036	0.0122	0.938462
TraesCS1A02G260000.1	TRIUR323928-P1	T. urartu	0.1081	98.1	540.9	0.2602	0.0251	0.0965	7.42308
TraesCS1A02G262700.1	TRIUR324724-P1	T. urartu	0.1771	86.8	453.2	0.3757	0.0466	0.124	9.53846
TraesCS1A02G266300.1	TRIUR322935-P1	T. urartu	0.0466	248.5	879.5	0.5746	0.0134	0.0232	1.78462
TraesCS1A02G269900.1	TRIUR320025-P1	T. urartu	0.1612	43.1	241.9	0.2916	0.0393	0.1348	10.3692
TraesCS1A02G273000.1	TRIUR319588-P1	T. urartu	0.6649	54	207	0.6768	0.2017	0.298	22.9231
TraesCS1A02G276800.1	TRIUR333088-P1	T. urartu	0.0263	128.3	579.7	0.4044	0.0069	0.0171	1.31538
TraesCS1A02G284000.1	TRIUR329290-P1	T. urartu	0.0986	374.2	1329.8	0.7081	0.0301	0.0425	3.26923
TraesCS1A02G290800.1	TRIUR317467-P1	T. urartu	0.0162	125.7	831.3	0.0965	0.0024	0.0251	1.93077
TraesCS1A02G298500.1	TRIUR320025-P1	T. urartu	0.2253	37.6	247.4	0.2298	0.0521	0.2267	17.4385
TraesCS1A02G300900.1	TRIUR320905-P1	T. urartu	0.0207	172.7	712.3	0.4836	0.0057	0.0118	0.907692
TraesCS1A02G301000.1	TRIUR334396-P1	T. urartu	0.0269	169.7	628.3	0.8812	0.0087	0.0099	0.761538
TraesCS1A02G301100.1	TRIUR322128-P1	T. urartu	0.034	136.1	772.9	0.2589	0.0079	0.0307	2.36154
TraesCS1A02G301200.1	TRIUR322129-P1	T. urartu	0.0334	175.6	664.4	0.0723	0.003	0.0419	3.22308
TraesCS1A02G302700.1	TRIUR313028-P1	T. urartu	0.0102	251.9	642.1	0.7641	0.0031	0.0041	0.315385
TraesCS1A02G305500.1	TRIUR306848-P1	T. urartu	0.0456	217	854	1.3227	0.016	0.0121	0.930769
TraesCS1A02G306300.1	TRIUR306726-P1	T. urartu	0.0909	135.5	512.5	0.9339	0.0299	0.032	2.46154
TraesCS1A02G308100.1	TRIUR317275-P1	T. urartu	0.0141	321.6	779.4	0.0992	0.0013	0.013	1
TraesCS1A02G311900.1	TRIUR318393-P1	T. urartu	0.4653	80.1	438.9	0.6795	0.1446	0.2128	16.3692
TraesCS1A02G313600.1	TRIUR304794-P1	T. urartu	0.0413	220.2	661.8	1.7019	0.0154	0.009	0.692308
TraesCS1A02G314400.1	TRIUR306313-P1	T. urartu	0.0103	510.9	1850.1	0.4443	0.0027	0.0061	0.469231
TraesCS1A02G327100.1	TRIUR310153-P1	T. urartu	0.0883	154.1	646.9	0.8341	0.0283	0.034	2.61538
TraesCS1A02G329900.1	TRIUR318984-P1	T. urartu	0.2555	251.9	723.1	0.4751	0.0662	0.1394	10.7231
TraesCS1A02G332100.1	TRIUR320025-P1	T. urartu	0.1892	76	392	0.4296	0.0519	0.1208	9.29231
TraesCS1A02G334100.1	TRIUR327858-P1	T. urartu	0.5035	66	312	0.6199	0.1516	0.2446	18.8154
TraesCS1A02G334900.1	TRIUR314814-P1	T. urartu	0.3181	418.3	1183.7	0.8659	0.1019	0.1177	9.05385
TraesCS1A02G335900.1	TRIUR306377-P1	T. urartu	0.0057	346.4	1285.6	0.1293	0.0008	0.006	0.461538
TraesCS1A02G345200.1	TRIUR335464-P1	T. urartu	0.5369	127.7	394.3	0.4798	0.1414	0.2948	22.6769
TraesCS1A02G350400.1	TRIUR318146-P1	T. urartu	0.4702	200	949	0.4568	0.1298	0.2842	21.8615
TraesCS1A02G358100.1	TRIUR301979-P1	T. urartu	0.1125	53.9	444.1	0.2454	0.0281	0.1146	8.81538
TraesCS1A02G358400.1	TRIUR301979-P1	T. urartu	0.1003	61.9	436.1	0.1874	0.0217	0.1159	8.91538
TraesCS1A02G365900.1	TRIUR308099-P1	T. urartu	0.1865	107.5	732.5	0.1883	0.0401	0.2128	16.3692
TraesCS1A02G366000.1	TRIUR308099-P1	T. urartu	0.0365	108.5	731.5	1.2874	0.0125	0.0097	0.746154
TraesCS1A02G366300.1	TRIUR316874-P1	T. urartu	0.0197	94	677	0.5612	0.006	0.0107	0.823077
TraesCS1A02G369200.1	TRIUR329141-P1	T. urartu	0.4976	131.3	438.7	0.4303	0.1271	0.2954	22.7231
TraesCS1A02G372200.1	TRIUR310778-P1	T. urartu	0.1616	89.6	420.4	0.7943	0.0515	0.0649	4.99231
TraesCS1A02G372300.1	TRIUR310779-P1	T. urartu	0.0285	56.3	387.7	0.1344	0.0052	0.0389	2.99231
TraesCS1A02G372900.1	TRIUR305289-P1	T. urartu	0.0401	279	636	0.5997	0.0111	0.0185	1.42308
TraesCS1A02G396400.1	TRIUR333948-P1	T. urartu	0.0109	568.8	1387.2	2.4125	0.0044	0.0018	0.138462
TraesCS1A02G405300.1	TRIUR301738-P1	T. urartu	0.0241	32.5	231.5	0.1278	0.0044	0.0342	2.63077
TraesCS1A02G409800.1	TRIUR318341-P1	T. urartu	0.1458	177.5	536.5	0.9797	0.0483	0.0493	3.79231
TraesCS1A02G419000.1	TRIUR331391-P1	T. urartu	0.032	42.7	236.3	0.001	0.0001	0.0693	5.33077
TraesCS1A02G419300.1	TRIUR311453-P1	T. urartu	0.0661	36.9	251.1	0.0281	0.0041	0.1442	11.0923
TraesCS1A02G420500.1	TRIUR330450-P1	T. urartu	0.0076	603.9	1382.1	0.6736	0.0022	0.0033	0.253846
TraesCS1A02G423300.1	TRIUR320025-P1	T. urartu	0.2694	42.6	242.4	0.2674	0.0637	0.2382	18.3231
TraesCS1A02G427700.1	TRIUR320719-P1	T. urartu	0.0555	162.8	443.2	0.6429	0.0161	0.0251	1.93077
TraesCS1A02G437400.1	TRIUR308128-P1	T. urartu	0.0068	348.4	977.6	0.6867	0.002	0.003	0.230769
TraesCS1A02G445600.1	TRIUR310106-P1	T. urartu	0.1232	805.1	2911.9	0.6363	0.0365	0.0574	4.41538
TraesCS1A02G445700.1	TRIUR321067-P1	T. urartu	0.0851	142.9	676.1	0.4732	0.0238	0.0502	3.86154
TraesCS1B02G005200.1	TRIDC1BG000730.1	T. dicoccoides	0.0934	142.9	535.1	0.2466	0.0189	0.0768	5.90769
TraesCS1B02G023400.1	TRIDC1BG003080.1	T. dicoccoides	0.1647	209.1	753.9	0.337	0.0385	0.1141	8.77692
TraesCS1B02G023500.1	TRIDC1BG003080.1	T. dicoccoides	0.1114	210.6	752.4	0.557	0.0316	0.0568	4.36923
TraesCS1B02G037200.1	TRIDC1BG004120.1	T. dicoccoides	0.2155	512.6	1641.4	0.7697	0.0671	0.0871	6.7
TraesCS1B02G037300.1	TRIDC1BG004120.1	T. dicoccoides	0.392	582.1	1505.9	0.8211	0.1232	0.15	11.5385
TraesCS1B02G037400.1	TRIDC1BG004120.1	T. dicoccoides	0.4097	557.8	1488.2	0.5947	0.1152	0.1936	14.8923
TraesCS1B02G037500.1	TRIDC1BG004120.1	T. dicoccoides	0.4495	346.2	874.8	0.7116	0.1344	0.1889	14.5308
TraesCS1B02G045000.1	TRIDC1BG004980.2	T. dicoccoides	0.0884	217.9	832.1	0.8056	0.0281	0.0348	2.67692
TraesCS1B02G049700.1	TRIDC1BG003080.1	T. dicoccoides	0.1891	208.8	754.2	0.3635	0.0457	0.1257	9.66923
TraesCS1B02G086600.1	TRIDC1BG011700.3	T. dicoccoides	0.0049	1313.4	3741.6	0.3341	0.0011	0.0032	0.246154
TraesCS1B02G088500.1	TRIDC1BG012380.1	T. dicoccoides	0.013	120.2	809.8	0.1515	0.0025	0.0166	1.27692
TraesCS1B02G088900.1	TRIDC1BG012530.4	T. dicoccoides	0.0692	117.9	731.1	0.6729	0.0216	0.0321	2.46923
TraesCS1B02G091600.1	TRIDC1BG012940.4	T. dicoccoides	0.0066	174.3	746.7	0.235	0.0014	0.0058	0.446154
TraesCS1B02G091700.1	TRIDC1BG012960.1	T. dicoccoides	0.0133	136	782	0.0574	0.0013	0.0225	1.73077
TraesCS1B02G094500.1	TRIDC1BG013390.1	T. dicoccoides	0.0126	159	819	0.1893	0.0025	0.013	1
TraesCS1B02G097500.1	TRIDC1BG013910.1	T. dicoccoides	0.0118	250.1	781.9	0.9482	0.0039	0.0041	0.315385
TraesCS1B02G106800.1	TRIDC1BG015350.3	T. dicoccoides	0.2692	57	327	0.4798	0.0773	0.1611	12.3923
TraesCS1B02G112900.1	TRIDC1BG016240.1	T. dicoccoides	0.1561	374.7	1440.3	0.1807	0.0269	0.1487	11.4385
TraesCS1B02G113100.1	TRIDC1BG016240.1	T. dicoccoides	0.1168	349.9	1201.1	0.6806	0.0352	0.0518	3.98462
TraesCS1B02G122500.1	TRIDC1BG017860.1	T. dicoccoides	0.0245	331.9	1036.1	1.4172	0.0088	0.0062	0.476923
TraesCS1B02G125900.1	TRIDC1BG017860.1	T. dicoccoides	0.4421	300	963	0.4573	0.115	0.2514	19.3385
TraesCS1B02G126600.1	TRIDC1BG018220.2	T. dicoccoides	0.0138	131.9	303.1	0.4602	0.0034	0.0074	0.569231
TraesCS1B02G127400.1	TRIDC1BG018090.3	T. dicoccoides	0.0093	245.8	756.2	0.156	0.0013	0.0085	0.653846
TraesCS1B02G135600.1	TRIDC7BG067220.2	T. dicoccoides	0.2468	165.3	665.7	0.5788	0.0719	0.1242	9.55385
TraesCS1B02G147800.1	TRIDC1BG022960.8	T. dicoccoides	0.0892	237.7	797.3	1.1205	0.0305	0.0272	2.09231
TraesCS1B02G173700.1	TRIDC1BG029000.1	T. dicoccoides	0.0044	545.3	1527.7	0.6797	0.0013	0.0019	0.146154
TraesCS1B02G203300.1	TRIDC1BG033940.5	T. dicoccoides	0.0212	369.4	1646.6	0.8513	0.0069	0.008	0.615385
TraesCS1B02G212000.1	TRIDC1BG035450.1	T. dicoccoides	0.0089	226.8	793.2	0.5575	0.0025	0.0045	0.346154
TraesCS1B02G215500.1	TRIDC1BG036000.2	T. dicoccoides	0.0501	112.9	442.1	0.8276	0.016	0.0194	1.49231
TraesCS1B02G223400.1	TRIDC1BG036990.1	T. dicoccoides	0.0056	287.7	1338.3	0.4123	0.0015	0.0036	0.276923
TraesCS1B02G226200.1	TRIDC1BG037430.5	T. dicoccoides	0.005	194.5	1026.5	0.1841	0.001	0.0053	0.407692
TraesCS1B02G228000.1	TRIDC1BG037690.7	T. dicoccoides	0.0039	396.8	1181.2	0.3192	0.0008	0.0026	0.2
TraesCS1B02G229500.1	TRIDC1BG037970.1	T. dicoccoides	0.0063	105.9	845.1	0.126	0.0012	0.0095	0.730769
TraesCS1B02G232300.1	TRIDC1BG038430.1	T. dicoccoides	0.0077	120.1	689.9	0.1621	0.0014	0.0089	0.684615
TraesCS1B02G235100.1	TRIDC1BG038830.7	T. dicoccoides	0.019	258	762	0.0616	0.0013	0.0212	1.63077
TraesCS1B02G243100.1	TRIDC1BG039880.1	T. dicoccoides	0.0125	172.1	553.9	0.6217	0.0036	0.0059	0.453846
TraesCS1B02G243200.1	TRIDC1BG039910.2	T. dicoccoides	0.0166	97.6	457.4	0.4325	0.0045	0.0104	0.8
TraesCS1B02G265400.1	TRIDC1BG043300.2	T. dicoccoides	0.0064	174.7	779.3	0.2246	0.0013	0.0058	0.446154
TraesCS1B02G266100.1	TRIDC1BG043410.3	T. dicoccoides	0.0178	684.3	1871.7	1.3758	0.0064	0.0047	0.361538
TraesCS1B02G268500.1	TRIDC1BG043770.2	T. dicoccoides	0.01	479.2	1041.8	1.8045	0.0039	0.0021	0.161538
TraesCS1B02G273700.1	TRIDC1BG044700.1	T. dicoccoides	0.0232	102.9	419.1	0.2484	0.0048	0.0195	1.5
TraesCS1B02G274300.1	TRIDC1BG044790.1	T. dicoccoides	0.0102	108.6	794.4	0.2643	0.0025	0.0096	0.738462
TraesCS1B02G277300.1	TRIDC1BG045200.1	T. dicoccoides	0.0097	278.8	1017.2	0.2484	0.002	0.0079	0.607692
TraesCS1B02G279400.1	TRIDC1BG045550.1	T. dicoccoides	0.0082	58.5	682.5	0.0833	0.0015	0.0176	1.35385
TraesCS1B02G282800.1	TRIDC1BG046170.2	T. dicoccoides	0.4618	143.6	561.4	0.5725	0.1336	0.2334	17.9538
TraesCS1B02G283000.1	TRIDC1BG046300.1	T. dicoccoides	0.017	137.4	402.6	0.6411	0.005	0.0078	0.6
TraesCS1B02G285000.1	TRIDC1BG046650.2	T. dicoccoides	0.0126	28.1	574.9	0.001	0.0001	0.0883	6.79231
TraesCS1B02G285900.1	TRIDC1BG046850.3	T. dicoccoides	0.0103	123	762	0.3263	0.0027	0.0082	0.630769
TraesCS1B02G288600.1	TRIDC1BG047480.10	T. dicoccoides	0.2395	97.1	223.9	1.4748	0.0884	0.06	4.61538
TraesCS1B02G293300.1	TRIDC1BG048240.1	T. dicoccoides	0.0037	505.8	1144.2	0.441	0.0009	0.002	0.153846
TraesCS1B02G295400.1	TRIDC1BG048510.1	T. dicoccoides	0.4981	77.6	360.4	0.6646	0.1524	0.2293	17.6385
TraesCS1B02G297900.1	TRIDC1BG048940.5	T. dicoccoides	0.0755	99.1	434.9	1.3439	0.0264	0.0197	1.51538
TraesCS1B02G300100.1	TRIDC1BG049260.3	T. dicoccoides	0.0516	198.1	1052.9	0.9452	0.017	0.018	1.38462
TraesCS1B02G308200.1	TRIDC1BG050150.2	T. dicoccoides	0.0102	204.4	1319.6	0.1244	0.0017	0.014	1.07692
TraesCS1B02G308800.1	TRIDC1BG050230.4	T. dicoccoides	0.0034	603.6	1229.4	0.4842	0.0008	0.0017	0.130769
TraesCS1B02G311000.1	TRIDC1BG050580.1	T. dicoccoides	0.1907	186.7	674.3	0.1949	0.0335	0.1721	13.2385
TraesCS1B02G316200.1	TRIDC1BG051420.5	T. dicoccoides	0.1475	220.9	871.1	0.7246	0.0457	0.063	4.84615
TraesCS1B02G318800.1	TRIDC1BG051830.3	T. dicoccoides	0.0912	249.8	797.2	0.9436	0.03	0.0318	2.44615
TraesCS1B02G320000.1	TRIDC1BG051990.2	T. dicoccoides	0.0098	150.7	473.3	0.3025	0.0021	0.007	0.538462
TraesCS1B02G326500.1	TRIDC1BG053060.2	T. dicoccoides	0.0226	66	486	0.0433	0.0021	0.0478	3.67692
TraesCS1B02G326700.1	TRIDC1BG053140.12	T. dicoccoides	0.0104	559.6	1801.4	0.3025	0.0022	0.0074	0.569231
TraesCS1B02G332000.1	TRIDC1BG053840.2	T. dicoccoides	0.0074	149.1	1095.9	0.2538	0.0018	0.0072	0.553846
TraesCS1B02G335100.1	TRIDC1BG054320.1	T. dicoccoides	0.0242	109.5	556.5	0.0449	0.0018	0.04	3.07692
TraesCS1B02G340500.1	TRIDC1BG055240.2	T. dicoccoides	0.0061	298.7	685.3	0.4462	0.0015	0.0033	0.253846
TraesCS1B02G342500.1	TRIDC1BG055500.1	T. dicoccoides	0.0273	94.8	466.2	0.2972	0.0065	0.0219	1.68462
TraesCS1B02G347900.1	TRIDC1BG056400.3	T. dicoccoides	0.0108	478.7	1210.3	0.77	0.0033	0.0043	0.330769
TraesCS1B02G349200.1	TRIDC1BG056660.3	T. dicoccoides	0.0054	466.1	1237.9	0.1854	0.0008	0.0044	0.338462
TraesCS1B02G351300.1	TRIDC1BG056900.7	T. dicoccoides	0.0066	991.4	2668.6	0.6246	0.0019	0.003	0.230769
TraesCS1B02G360300.1	TRIDC1BG058040.2	T. dicoccoides	0.0155	75.1	713.9	0.0348	0.0014	0.0407	3.13077
TraesCS1B02G363200.1	TRIDC1BG058570.1	T. dicoccoides	0.0349	92.9	513.1	0.9661	0.0116	0.012	0.923077
TraesCS1B02G374300.1	TRIDC1BG060230.3	T. dicoccoides	0.0252	214.7	634.3	0.8201	0.0079	0.0097	0.746154
TraesCS1B02G374700.1	TRIDC1BG060330.1	T. dicoccoides	0.0594	78.9	542.1	0.3058	0.0154	0.0503	3.86923
TraesCS1B02G383600.1	TRIDC1BG061540.4	T. dicoccoides	0.0236	101.6	804.4	0.7569	0.0076	0.01	0.769231
TraesCS1B02G383700.1	TRIDC1BG061560.1	T. dicoccoides	0.0457	101.7	777.3	0.1486	0.0092	0.0617	4.74615
TraesCS1B02G383800.1	TRIDC1BG061590.1	T. dicoccoides	0.0588	102.3	761.7	0.0575	0.0067	0.116	8.92308
TraesCS1B02G383900.1	TRIDC1BG061600.2	T. dicoccoides	0.0079	97	671	0.1417	0.0015	0.0106	0.815385
TraesCS1B02G389900.1	TRIDC1BG062320.5	T. dicoccoides	0.0493	78.7	716.3	0.0505	0.0057	0.1138	8.75385
TraesCS1B02G392200.1	TRIDC1BG062620.2	T. dicoccoides	0.0817	160.5	1006.5	0.0758	0.0102	0.1343	10.3308
TraesCS1B02G392300.1	TRIDC1BG062640.2	T. dicoccoides	0.0314	164.4	1008.6	0.1603	0.006	0.0376	2.89231
TraesCS1B02G392600.1	TRIDC7BG003140.1	T. dicoccoides	0.3563	195.2	557.8	0.3477	0.0799	0.2298	17.6769
TraesCS1B02G393100.1	TRIDC1BG062840.1	T. dicoccoides	0.1724	261.3	638.7	0.7436	0.0522	0.0702	5.4
TraesCS1B02G396000.1	TRIDC1BG063360.2	T. dicoccoides	0.0223	166.6	652.4	0.6306	0.0067	0.0106	0.815385
TraesCS1B02G411800.1	TRIDC1BG065070.1	T. dicoccoides	0.0117	178	608	0.1436	0.0017	0.0116	0.892308
TraesCS1B02G420500.1	TRIDC1BG066480.1	T. dicoccoides	0.0144	223.2	820.8	0.2208	0.0027	0.0124	0.953846
TraesCS1B02G423800.1	TRIDC1BG067010.3	T. dicoccoides	0.0187	191.5	465.5	0.1343	0.0022	0.0161	1.23846
TraesCS1B02G424100.1	TRIDC1BG067120.8	T. dicoccoides	0.0207	1240.3	3217.7	0.1867	0.0031	0.0167	1.28462
TraesCS1B02G424700.1	TRIDC1BG067240.5	T. dicoccoides	0.0082	594.2	1631.8	0.3527	0.0018	0.0052	0.4
TraesCS1B02G434300.1	TRIDC1BG068140.2	T. dicoccoides	0.0201	72.1	908.9	0.001	0.0001	0.0898	6.90769
TraesCS1B02G434800.1	TRIDC1BG068670.1	T. dicoccoides	0.0287	24.8	239.2	0.001	0.0001	0.1012	7.78462
TraesCS1B02G435000.1	TRIDC1BG068640.2	T. dicoccoides	0.0447	14.9	249.1	0.0207	0.0041	0.1957	15.0538
TraesCS1B02G435100.1	TRIDC1BG068670.1	T. dicoccoides	0.0486	25.2	238.8	0.2632	0.0128	0.0486	3.73846
TraesCS1B02G435200.1	TRIDC1BG068670.1	T. dicoccoides	0.0249	28.8	235.2	0.1035	0.0043	0.0412	3.16923
TraesCS1B02G439800.1	TRIDC1BG069090.8	T. dicoccoides	0.0078	361.6	814.4	0.8329	0.0024	0.0029	0.223077
TraesCS1B02G440500.1	TRIDC1BG069240.1	T. dicoccoides	0.062	101	649	0.1748	0.0126	0.0723	5.56154
TraesCS1B02G441800.1	TRIDC1BG069460.3	T. dicoccoides	0.0098	323.9	612.1	1.056	0.0033	0.0031	0.238462
TraesCS1B02G444400.1	TRIDC1BG069950.1	T. dicoccoides	0.0063	66.7	947.3	0.0638	0.0011	0.0166	1.27692
TraesCS1B02G449400.1	TRIDC1BG070630.2	T. dicoccoides	0.0313	47.6	240.4	0.1033	0.0043	0.0415	3.19231
TraesCS1B02G451500.1	TRIDC1BG070900.1	T. dicoccoides	0.0278	526.8	1459.2	0.1018	0.0028	0.0273	2.1
TraesCS1B02G453200.1	TRIDC1BG071170.1	T. dicoccoides	0.3733	112	467	0.2786	0.0829	0.2976	22.8923
TraesCS1B02G462600.1	TRIDC1BG072200.1	T. dicoccoides	0.017	162.9	374.1	0.8692	0.0054	0.0062	0.476923
TraesCS1B02G472000.1	TRIDC1BG073190.1	T. dicoccoides	0.0045	461.4	864.6	0.535	0.0012	0.0022	0.169231
TraesCS1D02G018200.1	EMT11934	Ae. tauschii	0.0688	319.8	835.2	0.1555	0.0092	0.0589	4.53077
TraesCS1D02G020900.1	EMT18103	Ae. tauschii	0.0919	212.5	567.5	1.0394	0.031	0.0298	2.29231
TraesCS1D02G030700.1	EMT19600	Ae. tauschii	0.2094	95.6	267.4	0.1995	0.0339	0.1701	13.0846
TraesCS1D02G030800.1	EMT06007	Ae. tauschii	0.3904	581.9	1521.1	0.5986	0.1098	0.1834	14.1077
TraesCS1D02G030900.1	EMT06008	Ae. tauschii	0.0275	603.7	1535.3	0.4114	0.0065	0.0159	1.22308
TraesCS1D02G031000.1	EMT19597	Ae. tauschii	0.1034	598.1	1576.9	0.3888	0.0241	0.0619	4.76154
TraesCS1D02G031200.1	EMT06007	Ae. tauschii	0.3854	592.8	1555.2	0.6383	0.1111	0.174	13.3846
TraesCS1D02G037100.1	EMT09593	Ae. tauschii	0.0777	129.3	509.7	0.702	0.0238	0.034	2.61538
TraesCS1D02G040700.1	EMT01811	Ae. tauschii	0.0067	490.9	1327.1	0.5032	0.0018	0.0035	0.269231
TraesCS1D02G041700.1	EMT21733	Ae. tauschii	0.0815	106.4	424.6	0.9026	0.0266	0.0295	2.26923
TraesCS1D02G045700.1	EMT10914	Ae. tauschii	0.0171	162.2	545.8	0.2938	0.0037	0.0125	0.961538
TraesCS1D02G055600.1	EMT20356	Ae. tauschii	0.0541	167.7	792.3	1.131	0.0184	0.0163	1.25385
TraesCS1D02G059200.1	EMT19064	Ae. tauschii	0.2964	229.2	799.8	0.5839	0.0853	0.146	11.2308
TraesCS1D02G064300.1	EMT20159	Ae. tauschii	0.2198	60.4	353.6	0.3652	0.0584	0.16	12.3077
TraesCS1D02G069700.1	EMT26446	Ae. tauschii	0.0177	1154.5	3486.5	1.5612	0.0065	0.0041	0.315385
TraesCS1D02G078100.1	EMT06248	Ae. tauschii	0.4925	300.9	839.1	0.4809	0.1278	0.2657	20.4385
TraesCS1D02G078600.1	EMT31736	Ae. tauschii	0.016	146	808	0.2654	0.0038	0.0141	1.08462
TraesCS1D02G084200.1	EMT29957	Ae. tauschii	0.1758	300.4	1181.6	0.4323	0.0463	0.1071	8.23846
TraesCS1D02G106600.1	EMT28014	Ae. tauschii	0.5377	217.6	850.4	0.5293	0.1518	0.2867	22.0538
TraesCS1D02G111400.1	EMT08575	Ae. tauschii	0.149	135.3	527.7	0.4421	0.0395	0.0893	6.86923
TraesCS1D02G122400.1	EMT14792	Ae. tauschii	0.0207	102.4	479.6	0.683	0.0064	0.0093	0.715385
TraesCS1D02G125000.1	EMT27463	Ae. tauschii	0.0781	173.2	459.8	0.4818	0.0201	0.0418	3.21538
TraesCS1D02G125400.1	EMT19784	Ae. tauschii	0.0753	470	1900	0.4373	0.02	0.0457	3.51538
TraesCS1D02G127700.1	EMT09055	Ae. tauschii	0.2098	119.9	603.1	0.5097	0.0603	0.1183	9.1
TraesCS1D02G139300.1	EMT29487	Ae. tauschii	0.0532	244.1	742.9	0.5268	0.0145	0.0275	2.11538
TraesCS1D02G155100.1	EMT22525	Ae. tauschii	0.1869	442.1	1432.9	0.6084	0.0541	0.0889	6.83846
TraesCS1D02G155200.1	EMT25632	Ae. tauschii	0.0253	436.6	1381.4	0.8081	0.008	0.0099	0.761538
TraesCS1D02G193800.1	EMT11923	Ae. tauschii	0.3889	131.3	780.7	0.4285	0.1088	0.2538	19.5231
TraesCS1D02G197300.1	EMT18268	Ae. tauschii	0.0134	442.9	2068.1	0.7203	0.0042	0.0058	0.446154
TraesCS1D02G215600.1	EMT20148	Ae. tauschii	0.0768	54.7	383.3	0.164	0.0156	0.0953	7.33077
TraesCS1D02G221500.1	EMT23855	Ae. tauschii	0.022	151.7	682.3	1.0465	0.0074	0.0071	0.546154
TraesCS1D02G223600.1	EMT19751	Ae. tauschii	0.1256	276.5	749.5	0.7449	0.0383	0.0514	3.95385
TraesCS1D02G242800.1	EMT13393	Ae. tauschii	0.1356	251	808	1.0354	0.0456	0.044	3.38462
TraesCS1D02G254700.1	EMT26237	Ae. tauschii	0.0095	638.5	1938.5	0.5046	0.0026	0.0051	0.392308
TraesCS1D02G257400.1	EMT13093	Ae. tauschii	0.0382	441.8	1319.2	1.0137	0.0128	0.0126	0.969231
TraesCS1D02G275500.1	EMT05112	Ae. tauschii	0.1919	117.2	500.8	0.7259	0.0597	0.0823	6.33077
TraesCS1D02G278800.1	EMT24478	Ae. tauschii	0.1782	94.9	226.1	2.6309	0.0727	0.0276	2.12308
TraesCS1D02G280600.1	EMT28781	Ae. tauschii	0.1918	76.5	514.5	0.3865	0.053	0.1372	10.5538
TraesCS1D02G287500.1	EMT16519	Ae. tauschii	0.1496	74.2	330.8	0.5411	0.0432	0.0798	6.13846
TraesCS1D02G289400.1	EMT26125	Ae. tauschii	0.0195	199.6	1057.4	0.3946	0.0052	0.0132	1.01538
TraesCS1D02G292200.1	EMT26998	Ae. tauschii	0.1414	260.9	990.1	0.6485	0.0423	0.0653	5.02308
TraesCS1D02G292700.1	EMT13570	Ae. tauschii	0.1281	159.4	1355.6	0.0718	0.0181	0.252	19.3846
TraesCS1D02G300400.1	EMT17792	Ae. tauschii	0.1164	178	680	0.761	0.0364	0.0479	3.68462
TraesCS1D02G300500.1	EMT17791	Ae. tauschii	0.1929	187.2	727.8	0.6526	0.058	0.0889	6.83846
TraesCS1D02G300900.1	EMT19877	Ae. tauschii	0.007	174.4	695.6	0.2417	0.0014	0.006	0.461538
TraesCS1D02G302100.1	EMT05021	Ae. tauschii	0.0216	267.4	581.6	2.3279	0.0088	0.0038	0.292308
TraesCS1D02G305200.1	EMT16442	Ae. tauschii	0.1999	250	908	0.5854	0.0578	0.0987	7.59231
TraesCS1D02G306000.1	EMT17350	Ae. tauschii	0.0607	211.7	703.3	0.7524	0.0188	0.025	1.92308
TraesCS1D02G307500.1	EMT09579	Ae. tauschii	0.0776	299	1012	0.8082	0.0245	0.0304	2.33846
TraesCS1D02G308600.1	EMT09301	Ae. tauschii	0.0841	202.7	643.3	0.7782	0.0262	0.0337	2.59231
TraesCS1D02G310200.1	EMT09911	Ae. tauschii	0.1098	205.9	586.1	1.576	0.0405	0.0257	1.97692
TraesCS1D02G310700.1	EMT19631	Ae. tauschii	0.1188	136	605	1.0936	0.0402	0.0368	2.83077
TraesCS1D02G314100.1	EMT09717	Ae. tauschii	0.1598	234.5	650.5	1.0347	0.0537	0.0519	3.99231
TraesCS1D02G329200.1	EMT01440	Ae. tauschii	0.0142	201.2	647.8	0.3077	0.0031	0.0101	0.776923
TraesCS1D02G332200.1	EMT13602	Ae. tauschii	0.2254	238.1	688.9	0.6563	0.0662	0.1009	7.76154
TraesCS1D02G337400.1	EMT08561	Ae. tauschii	0.0653	444	1299	0.8708	0.021	0.0241	1.85385
TraesCS1D02G338300.1	EMT23555	Ae. tauschii	0.0586	359.8	1272.2	0.6332	0.0173	0.0274	2.10769
TraesCS1D02G341000.1	EMT16215	Ae. tauschii	0.0102	843.4	2744.6	0.4179	0.0026	0.0061	0.469231
TraesCS1D02G347900.1	EMT06885	Ae. tauschii	0.0381	134.1	423.9	1.7919	0.0142	0.0079	0.607692
TraesCS1D02G355600.1	EMT09460	Ae. tauschii	0.0152	82	323	0.2421	0.0031	0.0128	0.984615
TraesCS1D02G362000.1	EMT20212	Ae. tauschii	0.1203	154.3	601.7	0.5574	0.0345	0.0619	4.76154
TraesCS1D02G362900.1	EMT22670	Ae. tauschii	0.1039	98.1	561.9	0.2149	0.0224	0.1044	8.03077
TraesCS1D02G363300.1	EMT22670	Ae. tauschii	0.0549	86.2	582.8	0.3152	0.0143	0.0454	3.49231
TraesCS1D02G371400.1	EMT30968	Ae. tauschii	0.1709	106.9	775.1	0.2502	0.0418	0.167	12.8462
TraesCS1D02G371500.1	EMT30968	Ae. tauschii	0.0696	108.8	782.2	0.3222	0.0185	0.0573	4.40769
TraesCS1D02G378800.1	EMT09996	Ae. tauschii	0.4821	181.7	706.3	0.551	0.1377	0.25	19.2308
TraesCS1D02G379700.1	EMT32685	Ae. tauschii	0.166	250.2	661.8	0.7818	0.0514	0.0658	5.06154
TraesCS1D02G391300.1	EMT11470	Ae. tauschii	0.0234	110.2	399.8	0.9474	0.0077	0.0081	0.623077
TraesCS1D02G393200.1	EMT02398	Ae. tauschii	0.0345	87.1	452.9	0.3766	0.0091	0.0241	1.85385
TraesCS1D02G400400.1	EMT18161	Ae. tauschii	0.4352	164.5	528.5	0.7553	0.1347	0.1784	13.7231
TraesCS1D02G403700.1	EMT22966	Ae. tauschii	0.0183	1202.3	4134.7	0.8912	0.0059	0.0066	0.507692
TraesCS1D02G406900.1	EMT01027	Ae. tauschii	0.0475	232.5	991.5	0.4009	0.0123	0.0307	2.36154
TraesCS1D02G407100.1	EMT05789	Ae. tauschii	0.3402	176.6	654.4	0.2703	0.072	0.2666	20.5077
TraesCS1D02G412500.1	EMT19032	Ae. tauschii	0.4747	80	412	0.5297	0.1383	0.261	20.0769
TraesCS1D02G415000.1	EMT02062	Ae. tauschii	0.4576	106.2	574.8	0.5009	0.132	0.2635	20.2692
TraesCS1D02G417100.1	EMT28228	Ae. tauschii	0.0137	382.1	763.9	0.1189	0.0013	0.0111	0.853846
TraesCS1D02G419500.1	EMT12224	Ae. tauschii	0.0784	53.2	348.8	0.3675	0.0213	0.0579	4.45385
TraesCS1D02G421200.1	EMT14851	Ae. tauschii	0.0215	172.9	820.1	0.5084	0.0061	0.0121	0.930769
TraesCS1D02G425800.1	EMT28879	Ae. tauschii	0.1147	54.5	314.5	0.2392	0.026	0.1087	8.36154
TraesCS1D02G425900.1	EMT30484	Ae. tauschii	0.3384	88	458	0.3712	0.0886	0.2387	18.3615
TraesCS1D02G426800.1	EMT00143	Ae. tauschii	0.0199	46.3	250.7	0.2002	0.0041	0.0205	1.57692
TraesCS1D02G428400.1	EMT32359	Ae. tauschii	0.1325	440.5	1545.5	0.9414	0.0436	0.0463	3.56154
TraesCS1D02G430000.1	EMT31777	Ae. tauschii	0.4671	191.5	696.5	0.3957	0.1171	0.296	22.7692
TraesCS1D02G441200.1	EMT10885	Ae. tauschii	0.016	107.8	462.2	0.4584	0.0044	0.0095	0.730769
TraesCS1D02G445200.1	EMT18117	Ae. tauschii	0.0046	268.8	1063.2	0.2337	0.0009	0.004	0.307692
TraesCS2A02G004700.1	TRIUR316274-P1	T. urartu	0.0673	214.8	712.2	0.1594	0.0101	0.0633	4.86923
TraesCS2A02G009100.1	TRIUR326890-P1	T. urartu	0.3843	331.9	976.1	0.4172	0.0946	0.2267	17.4385
TraesCS2A02G011000.1	TRIUR316697-P1	T. urartu	0.0427	31.9	253.1	0.3754	0.012	0.032	2.46154
TraesCS2A02G019300.1	TRIUR314306-P1	T. urartu	0.0132	224.9	471.1	0.9535	0.0043	0.0045	0.346154
TraesCS2A02G021400.1	TRIUR314306-P1	T. urartu	0.3637	100.6	301.4	0.4475	0.0926	0.207	15.9231
TraesCS2A02G031800.1	TRIUR305250-P1	T. urartu	0.0595	224.5	753.5	0.7964	0.0187	0.0235	1.80769
TraesCS2A02G043600.1	TRIUR303056-P1	T. urartu	0.3591	154.7	673.3	0.3558	0.0894	0.2514	19.3385
TraesCS2A02G052100.1	TRIUR301445-P1	T. urartu	0.3348	180.1	521.9	0.3876	0.0794	0.2049	15.7615
TraesCS2A02G053500.1	TRIUR330513-P1	T. urartu	0.2376	215.1	897.9	0.5259	0.0674	0.1282	9.86154
TraesCS2A02G063200.1	TRIUR304556-P1	T. urartu	0.0453	290.6	738.4	0.2546	0.0083	0.0324	2.49231
TraesCS2A02G063300.1	TRIUR304557-P1	T. urartu	0.0189	332.3	801.7	0.9945	0.0063	0.0063	0.484615
TraesCS2A02G063400.1	TRIUR304558-P1	T. urartu	0.0263	192.1	650.9	0.2122	0.0047	0.0223	1.71538
TraesCS2A02G079700.1	TRIUR312694-P1	T. urartu	0.0419	205.3	598.7	0.7877	0.0131	0.0166	1.27692
TraesCS2A02G089300.1	TRIUR319594-P1	T. urartu	0.1139	273.9	959.1	0.6334	0.0336	0.0531	4.08462
TraesCS2A02G096800.1	TRIUR314675-P1	T. urartu	0.0151	323.4	1548.6	0.0251	0.0007	0.026	2
TraesCS2A02G097500.1	TRIUR319937-P1	T. urartu	0.0767	206.7	678.3	0.7915	0.0241	0.0304	2.33846
TraesCS2A02G099400.1	TRIUR321253-P1	T. urartu	0.0759	14.8	276.2	0.1035	0.0176	0.1697	13.0538
TraesCS2A02G100600.1	TRIUR316070-P1	T. urartu	0.0338	159.3	569.7	0.4805	0.0091	0.0189	1.45385
TraesCS2A02G100800.1	TRIUR332855-P1	T. urartu	0.0107	468.3	968.7	0.6872	0.0031	0.0045	0.346154
TraesCS2A02G101000.1	TRIUR324774-P1	T. urartu	0.0201	149.3	912.7	0.2098	0.0044	0.0209	1.60769
TraesCS2A02G101100.1	TRIUR324774-P1	T. urartu	0.0892	142.6	898.4	0.0558	0.009	0.1606	12.3538
TraesCS2A02G101200.1	TRIUR324110-P1	T. urartu	0.0147	127.8	700.2	0.1777	0.0029	0.0161	1.23846
TraesCS2A02G101900.1	TRIUR332458-P1	T. urartu	0.1967	106.1	922.9	0.1402	0.0402	0.2865	22.0385
TraesCS2A02G104900.1	TRIUR326595-P1	T. urartu	0.2337	162	627	0.4302	0.0612	0.1424	10.9538
TraesCS2A02G105600.1	TRIUR304238-P1	T. urartu	0.0111	710.5	1794.5	0.2994	0.0022	0.0074	0.569231
TraesCS2A02G116100.1	TRIUR320779-P1	T. urartu	0.1572	227.9	903.1	0.4302	0.0414	0.0962	7.4
TraesCS2A02G124800.1	TRIUR301802-P1	T. urartu	0.0252	773.5	2370.5	1.1187	0.0086	0.0077	0.592308
TraesCS2A02G142800.1	TRIUR300571-P1	T. urartu	0.0684	356	1075	0.1745	0.0105	0.06	4.61538
TraesCS2A02G144100.1	TRIUR328399-P1	T. urartu	0.4461	387.4	1067.6	0.5996	0.1263	0.2106	16.2
TraesCS2A02G146600.1	TRIUR310874-P1	T. urartu	0.0505	75.3	419.7	0.2694	0.0119	0.0443	3.40769
TraesCS2A02G152900.1	TRIUR333813-P1	T. urartu	0.4945	106.8	604.2	0.4705	0.141	0.2997	23.0538
TraesCS2A02G153200.1	TRIUR310947-P1	T. urartu	0.0699	123.8	500.2	0.257	0.0148	0.0576	4.43077
TraesCS2A02G158900.1	TRIUR324509-P1	T. urartu	0.0261	494.7	1614.3	0.7702	0.0081	0.0105	0.807692
TraesCS2A02G163000.1	TRIUR323792-P1	T. urartu	0.0844	650.5	2307.5	0.5622	0.024	0.0427	3.28462
TraesCS2A02G172500.1	TRIUR322025-P1	T. urartu	0.0137	271.2	634.8	0.1361	0.0016	0.0116	0.892308
TraesCS2A02G182700.1	TRIUR309883-P1	T. urartu	0.2081	303.2	1049.8	0.5588	0.0589	0.1055	8.11538
TraesCS2A02G189600.1	TRIUR322207-P1	T. urartu	0.0681	151.1	1090.9	0.2392	0.0164	0.0684	5.26154
TraesCS2A02G189700.1	TRIUR322206-P1	T. urartu	0.12	410.8	1422.2	0.6261	0.0353	0.0564	4.33846
TraesCS2A02G192400.1	TRIUR315696-P1	T. urartu	0.0055	565.5	1081.5	1.0531	0.0019	0.0018	0.138462
TraesCS2A02G192600.1	TRIUR326966-P1	T. urartu	0.3481	58.5	340.5	0.3999	0.0951	0.2379	18.3
TraesCS2A02G194200.1	TRIUR317670-P1	T. urartu	0.0212	207.6	674.4	0.2889	0.0045	0.0155	1.19231
TraesCS2A02G194600.1	TRIUR331604-P1	T. urartu	0.0056	159.3	929.7	0.1653	0.0011	0.0065	0.5
TraesCS2A02G195700.1	TRIUR320025-P1	T. urartu	0.2397	42.6	242.4	0.1916	0.049	0.2556	19.6615
TraesCS2A02G197200.1	TRIUR301793-P1	T. urartu	0.2271	45.9	167.1	0.4205	0.0584	0.1389	10.6846
TraesCS2A02G198600.1	TRIUR328482-P1	T. urartu	0.0252	240.3	620.7	0.2749	0.0048	0.0176	1.35385
TraesCS2A02G199900.1	TRIUR318519-P1	T. urartu	0.185	409.5	1189.5	0.7066	0.0557	0.0789	6.06923
TraesCS2A02G214400.1	TRIUR335245-P1	T. urartu	0.0231	377.7	1332.3	1.2128	0.008	0.0066	0.507692
TraesCS2A02G230400.1	TRIUR326358-P1	T. urartu	0.0162	200.4	936.6	0.2093	0.0032	0.0154	1.18462
TraesCS2A02G232400.1	TRIUR323102-P1	T. urartu	0.0437	61.6	361.4	0.8312	0.0141	0.017	1.30769
TraesCS2A02G238700.1	TRIUR326160-P1	T. urartu	0.125	221.1	678.9	0.3302	0.0278	0.0842	6.47692
TraesCS2A02G245700.1	TRIUR331142-P1	T. urartu	0.0119	327.7	698.3	0.4718	0.0029	0.0062	0.476923
TraesCS2A02G261200.1	TRIUR321876-P1	T. urartu	0.0142	212.4	441.6	0.2336	0.0023	0.0098	0.753846
TraesCS2A02G264800.1	TRIUR335002-P1	T. urartu	0.1268	202.1	691.9	0.3907	0.0313	0.08	6.15385
TraesCS2A02G267600.1	TRIUR323944-P1	T. urartu	0.0973	279.3	1427.7	0.3244	0.0242	0.0745	5.73077
TraesCS2A02G270200.1	TRIUR328409-P1	T. urartu	0.0421	113.5	627.5	0.1726	0.0081	0.0469	3.60769
TraesCS2A02G275600.1	TRIUR334826-P1	T. urartu	0.0053	210.6	938.4	0.2168	0.0011	0.0049	0.376923
TraesCS2A02G283200.1	TRIUR324820-P1	T. urartu	0.0612	61.4	247.6	0.4877	0.0169	0.0346	2.66154
TraesCS2A02G283500.1	TRIUR328009-P1	T. urartu	0.3824	34.1	139.9	0.3587	0.0944	0.2633	20.2538
TraesCS2A02G283800.1	TRIUR326386-P1	T. urartu	0.0297	737.7	2343.3	0.8482	0.0095	0.0112	0.861538
TraesCS2A02G288700.1	TRIUR335273-P1	T. urartu	0.0275	114.2	671.8	0.1238	0.0045	0.0365	2.80769
TraesCS2A02G289500.1	TRIUR314531-P1	T. urartu	0.0088	478.9	901.1	1.587	0.0034	0.0021	0.161538
TraesCS2A02G292500.1	TRIUR320025-P1	T. urartu	0.2344	46.4	238.6	0.1843	0.0454	0.2465	18.9615
TraesCS2A02G297400.1	TRIUR307002-P1	T. urartu	0.136	312.8	893.2	0.5996	0.0386	0.0645	4.96154
TraesCS2A02G310700.1	TRIUR332168-P1	T. urartu	0.0165	25	377	0.0563	0.0027	0.0477	3.66923
TraesCS2A02G311500.1	TRIUR328259-P1	T. urartu	0.0126	130.5	841.5	0.442	0.0036	0.0081	0.623077
TraesCS2A02G320100.1	TRIUR308260-P1	T. urartu	0.173	244.6	838.4	0.8438	0.0554	0.0656	5.04615
TraesCS2A02G325900.1	TRIUR327497-P1	T. urartu	0.1349	180.3	473.7	0.9958	0.0449	0.0451	3.46923
TraesCS2A02G326300.1	TRIUR304855-P1	T. urartu	0.191	277.3	712.7	0.6197	0.0543	0.0877	6.74615
TraesCS2A02G326400.1	TRIUR304855-P1	T. urartu	0.1854	251.9	819.1	1.2931	0.0653	0.0505	3.88462
TraesCS2A02G326500.1	TRIUR329406-P1	T. urartu	0.01	310.1	607.9	0.999	0.0033	0.0033	0.253846
TraesCS2A02G326600.1	TRIUR327497-P1	T. urartu	0.0232	195.4	458.6	1.6134	0.0087	0.0054	0.415385
TraesCS2A02G328200.1	TRIUR322677-P1	T. urartu	0.1151	73.7	469.3	0.0642	0.0129	0.2007	15.4385
TraesCS2A02G328300.1	TRIUR322677-P1	T. urartu	0.057	72.9	470.1	0.5859	0.0173	0.0296	2.27692
TraesCS2A02G328400.1	TRIUR322676-P1	T. urartu	0.1044	81.4	491.6	0.6128	0.0319	0.0521	4.00769
TraesCS2A02G328500.1	TRIUR311154-P1	T. urartu	0.1123	60.9	500.1	0.3184	0.0304	0.0954	7.33846
TraesCS2A02G330500.1	TRIUR331607-P1	T. urartu	0.1408	307.2	1453.8	0.7927	0.0449	0.0566	4.35385
TraesCS2A02G331200.1	TRIUR335325-P1	T. urartu	0.0633	78.9	755.1	0.1141	0.0122	0.1067	8.20769
TraesCS2A02G338200.1	TRIUR325784-P1	T. urartu	0.0132	43.9	439.1	0.0885	0.0023	0.0256	1.96923
TraesCS2A02G338300.1	TRIUR309915-P1	T. urartu	0.0285	67.8	796.2	0.2459	0.0077	0.0311	2.39231
TraesCS2A02G339800.1	TRIUR330162-P1	T. urartu	0.0768	82.7	277.3	1.2143	0.0267	0.022	1.69231
TraesCS2A02G342500.1	TRIUR320987-P1	T. urartu	0.1599	240	1155	0.5232	0.0461	0.0881	6.77692
TraesCS2A02G352100.1	TRIUR323538-P1	T. urartu	0.1498	184.5	523.5	0.4074	0.0362	0.0889	6.83846
TraesCS2A02G352400.1	TRIUR326920-P1	T. urartu	0.0035	736.5	1837.5	0.7759	0.0011	0.0014	0.107692
TraesCS2A02G359400.1	TRIUR311916-P1	T. urartu	0.0163	99.3	647.7	0.4699	0.0047	0.01	0.769231
TraesCS2A02G392100.1	TRIUR322178-P1	T. urartu	0.0217	78.6	497.4	0.1472	0.004	0.0275	2.11538
TraesCS2A02G395400.1	TRIUR333139-P1	T. urartu	0.3982	174.6	710.4	0.5255	0.1127	0.2144	16.4923
TraesCS2A02G401200.1	TRIUR325907-P1	T. urartu	0.0156	491.4	1662.6	0.5739	0.0044	0.0077	0.592308
TraesCS2A02G404400.1	TRIUR321913-P1	T. urartu	0.0096	244	707	0.6864	0.0029	0.0042	0.323077
TraesCS2A02G409400.1	TRIUR326157-P1	T. urartu	0.0198	426.4	1277.6	0.1911	0.0032	0.0167	1.28462
TraesCS2A02G409600.1	TRIUR318279-P1	T. urartu	0.0845	242.8	789.2	0.7959	0.0266	0.0334	2.56923
TraesCS2A02G433000.1	TRIUR321369-P1	T. urartu	0.15	69.8	395.2	0.1257	0.0245	0.1946	14.9692
TraesCS2A02G443800.1	TRIUR328532-P1	T. urartu	0.0231	176.2	633.8	0.2584	0.0047	0.0183	1.40769
TraesCS2A02G445500.1	TRIUR318702-P1	T. urartu	0.1169	100.4	730.6	0.356	0.032	0.0898	6.90769
TraesCS2A02G447100.1	TRIUR326633-P1	T. urartu	0.2426	180.3	752.7	0.137	0.0365	0.2662	20.4769
TraesCS2A02G447200.1	TRIUR326633-P1	T. urartu	0.0132	172.6	760.4	0.0751	0.0013	0.0178	1.36923
TraesCS2A02G447600.1	TRIUR326472-P1	T. urartu	0.3364	162	660	0.5575	0.097	0.1739	13.3769
TraesCS2A02G448500.1	TRIUR329141-P1	T. urartu	0.0119	165.5	602.5	0.5404	0.0034	0.0062	0.476923
TraesCS2A02G448800.1	TRIUR307475-P1	T. urartu	0.191	98.9	435.1	0.8062	0.061	0.0756	5.81538
TraesCS2A02G460700.1	TRIUR316157-P1	T. urartu	0.2083	154	635	0.2388	0.0428	0.1792	13.7846
TraesCS2A02G461700.1	TRIUR318209-P1	T. urartu	0.0207	59.3	240.7	0.2272	0.0041	0.0181	1.39231
TraesCS2A02G462500.1	TRIUR334020-P1	T. urartu	0.2395	145.1	715.9	0.3384	0.06	0.1775	13.6538
TraesCS2A02G465700.1	TRIUR321370-P1	T. urartu	0.0732	215	805	0.2607	0.0153	0.0586	4.50769
TraesCS2A02G472300.1	TRIUR309991-P1	T. urartu	0.0154	54.7	560.3	0.0451	0.0018	0.0394	3.03077
TraesCS2A02G474400.1	TRIUR300423-P1	T. urartu	0.0173	572.8	1506.2	0.7558	0.0053	0.007	0.538462
TraesCS2A02G488000.1	TRIUR318803-P1	T. urartu	0.0234	281.9	636.1	0.1731	0.0032	0.0183	1.40769
TraesCS2A02G491000.1	TRIUR312386-P1	T. urartu	0.1129	685.1	2167.9	0.5972	0.0324	0.0543	4.17692
TraesCS2A02G502300.1	TRIUR334351-P1	T. urartu	0.0154	129.2	671.8	0.5331	0.0045	0.0084	0.646154
TraesCS2A02G505600.1	TRIUR326191-P1	T. urartu	0.0112	229.9	856.1	0.0908	0.0012	0.0132	1.01538
TraesCS2A02G514000.1	TRIUR310705-P1	T. urartu	0.0172	132.6	569.4	0.2316	0.0035	0.0152	1.16923
TraesCS2A02G515300.1	TRIUR318175-P1	T. urartu	0.032	138.7	533.3	0.2063	0.0059	0.0288	2.21538
TraesCS2A02G523900.1	TRIUR303114-P1	T. urartu	0.0608	207	546	2.6738	0.0245	0.0091	0.7
TraesCS2A02G526300.1	TRIUR328368-P1	T. urartu	0.1363	159.6	1091.4	0.2749	0.034	0.1236	9.50769
TraesCS2A02G534200.1	TRIUR319194-P1	T. urartu	0.0329	103.7	451.3	1.2393	0.0114	0.0092	0.707692
TraesCS2A02G534300.1	TRIUR319194-P1	T. urartu	0.4132	92.4	408.6	0.3736	0.1052	0.2816	21.6615
TraesCS2A02G552400.1	TRIUR301098-P1	T. urartu	0.0719	181.2	685.8	0.3155	0.0165	0.0523	4.02308
TraesCS2A02G561300.1	TRIUR311697-P1	T. urartu	0.1149	319.1	703.9	0.3608	0.0247	0.0684	5.26154
TraesCS2A02G566200.1	TRIUR310971-P1	T. urartu	0.0414	146.9	759.1	0.1336	0.0067	0.0503	3.86923
TraesCS2A02G566300.1	TRIUR310970-P1	T. urartu	0.0527	183.7	647.3	0.2728	0.011	0.0405	3.11538
TraesCS2A02G566400.1	TRIUR310969-P1	T. urartu	0.0184	133.1	697.9	0.1422	0.0031	0.0219	1.68462
TraesCS2B02G002700.1	TRIDC2BG001520.1	T. dicoccoides	0.0712	79.6	490.4	0.2652	0.0171	0.0645	4.96154
TraesCS2B02G051800.1	TRIDC2BG004730.8	T. dicoccoides	0.0793	682.6	2002.4	0.3857	0.0188	0.0488	3.75385
TraesCS2B02G053900.1	TRIDC2BG004970.1	T. dicoccoides	0.3467	98.6	492.4	0.323	0.0856	0.2652	20.4
TraesCS2B02G062900.1	TRIDC2BG005830.1	T. dicoccoides	0.0157	15.6	464.4	0.001	0.0002	0.1559	11.9923
TraesCS2B02G067400.1	TRIDC2BG006570.4	T. dicoccoides	0.044	261.3	914.7	1.1586	0.0151	0.013	1
TraesCS2B02G075900.1	TRIDC2BG007950.1	T. dicoccoides	0.0053	376.6	784.4	0.4878	0.0013	0.0027	0.207692
TraesCS2B02G076000.1	TRIDC2BG007950.3	T. dicoccoides	0.0091	277.4	730.6	0.7171	0.0027	0.0038	0.292308
TraesCS2B02G076100.1	TRIDC2BG007950.3	T. dicoccoides	0.3149	282.5	767.5	0.3903	0.0739	0.1894	14.5692
TraesCS2B02G076500.1	TRIDC2BG008160.2	T. dicoccoides	0.0161	207.4	551.6	0.3664	0.0037	0.01	0.769231
TraesCS2B02G082400.1	TRIDC2BG008900.1	T. dicoccoides	0.0343	134.1	783.9	0.1115	0.0053	0.0475	3.65385
TraesCS2B02G094500.1	TRIDC2BG010630.1	T. dicoccoides	0.0255	300.7	536.3	0.4227	0.0057	0.0135	1.03846
TraesCS2B02G113200.1	TRIDC2BG014120.4	T. dicoccoides	0.1374	239.3	759.7	1.3783	0.049	0.0356	2.73846
TraesCS2B02G116900.1	TRIDC2BG014520.2	T. dicoccoides	0.0627	130.4	1171.6	0.0658	0.0086	0.1311	10.0846
TraesCS2B02G117900.1	TRIDC2BG014670.2	T. dicoccoides	0.0317	104.7	675.3	0.3748	0.0086	0.023	1.76923
TraesCS2B02G118300.1	TRIDC2BG014700.3	T. dicoccoides	0.2456	146.1	861.9	0.1743	0.0485	0.2784	21.4154
TraesCS2B02G118400.1	TRIDC2BG014720.1	T. dicoccoides	0.0056	153.4	899.6	0.1761	0.0011	0.0063	0.484615
TraesCS2B02G119100.1	TRIDC2BG014820.2	T. dicoccoides	0.0088	56.5	1011.5	0.0266	0.001	0.0377	2.9
TraesCS2B02G122500.1	TRIDC2BG015370.4	T. dicoccoides	0.0034	768.6	1994.4	0.1812	0.0005	0.0028	0.215385
TraesCS2B02G122700.1	TRIDC2BG015380.1	T. dicoccoides	0.0166	283.2	817.8	0.6594	0.0049	0.0074	0.569231
TraesCS2B02G127800.1	TRIDC2BG016110.2	T. dicoccoides	0.0279	32.7	408.3	0.2375	0.0075	0.0316	2.43077
TraesCS2B02G135600.1	TRIDC2BG016930.1	T. dicoccoides	0.0351	219.1	830.9	0.921	0.0115	0.0125	0.961538
TraesCS2B02G136100.1	TRIDC2BG016990.1	T. dicoccoides	0.0102	68	844	0.1547	0.0024	0.0156	1.2
TraesCS2B02G146100.1	TRIDC2BG018560.1	T. dicoccoides	0.177	209	814	0.3464	0.0426	0.1229	9.45385
TraesCS2B02G147300.1	TRIDC3BG018420.17	T. dicoccoides	0.0804	597.1	1811.9	0.4802	0.0211	0.044	3.38462
TraesCS2B02G165700.1	TRIDC2BG021190.1	T. dicoccoides	0.0366	135.1	785.9	0.2494	0.0085	0.0339	2.60769
TraesCS2B02G167900.1	TRIDC2BG021550.1	T. dicoccoides	0.1027	472.2	1234.8	0.1002	0.0098	0.0981	7.54615
TraesCS2B02G176900.1	TRIDC2BG022850.3	T. dicoccoides	0.0055	258	873	0.2798	0.0011	0.0041	0.315385
TraesCS2B02G177900.1	TRIDC2BG023010.2	T. dicoccoides	0.03	96.7	953.3	0.0935	0.0053	0.0565	4.34615
TraesCS2B02G184500.1	TRIDC2BG023880.2	T. dicoccoides	0.0042	709.2	1507.8	0.2345	0.0007	0.0029	0.223077
TraesCS2B02G212300.1	TRIDC2BG028040.2	T. dicoccoides	0.0355	233.6	1173.4	0.1881	0.0069	0.0366	2.81538
TraesCS2B02G212700.1	TRIDC2BG028090.1	T. dicoccoides	0.0067	279.2	626.8	0.4486	0.0016	0.0036	0.276923
TraesCS2B02G217400.1	TRIDC2BG028850.1	T. dicoccoides	0.0124	546.6	1211.4	0.1701	0.0016	0.0097	0.746154
TraesCS2B02G218900.1	TRIDC2BG029070.6	T. dicoccoides	0.0192	606.7	1799.3	0.4712	0.005	0.0106	0.815385
TraesCS2B02G219300.1	TRIDC2BG029150.1	T. dicoccoides	0.01	129.1	782.9	0.3978	0.0028	0.0069	0.530769
TraesCS2B02G226000.1	TRIDC2BG030000.1	T. dicoccoides	0.0141	288.5	572.5	0.5084	0.0035	0.007	0.538462
TraesCS2B02G231800.1	TRIDC2BG030940.7	T. dicoccoides	0.0032	829.2	2041.8	0.1946	0.0005	0.0025	0.192308
TraesCS2B02G232000.1	TRIDC2BG030960.5	T. dicoccoides	0.1109	245.2	789.8	0.8492	0.0355	0.0418	3.21538
TraesCS2B02G252000.1	TRIDC2BG034360.2	T. dicoccoides	0.0125	103.6	622.4	0.3311	0.0032	0.0098	0.753846
TraesCS2B02G256600.1	TRIDC2BG034590.1	T. dicoccoides	0.0117	236.5	537.5	0.8755	0.0037	0.0043	0.330769
TraesCS2B02G265800.1	TRIDC2BG038180.2	T. dicoccoides	0.0145	200.4	1071.6	0.3538	0.0037	0.0106	0.815385
TraesCS2B02G268200.1	TRIDC2BG039910.7	T. dicoccoides	0.0264	178.6	862.4	1.4178	0.0093	0.0065	0.5
TraesCS2B02G277300.1	TRIDC2BG040260.1	T. dicoccoides	0.0113	246.3	827.7	0.8945	0.0037	0.0041	0.315385
TraesCS2B02G281000.1	TRIDC2BG040760.5	T. dicoccoides	0.0488	197.7	621.3	0.8945	0.0158	0.0177	1.36154
TraesCS2B02G289000.1	TRIDC2BG041960.1	T. dicoccoides	0.3907	153.3	632.7	0.4638	0.1063	0.2291	17.6231
TraesCS2B02G293300.1	TRIDC2BG042830.2	T. dicoccoides	0.0455	169.2	778.8	0.5281	0.0131	0.0248	1.90769
TraesCS2B02G298600.1	TRIDC2BG043690.1	T. dicoccoides	0.006	146.5	882.5	0.1598	0.0011	0.0071	0.546154
TraesCS2B02G300500.1	TRIDC2BG043990.1	T. dicoccoides	0.2406	38.4	174.6	0.7061	0.0746	0.1057	8.13077
TraesCS2B02G300800.1	TRIDC2BG044040.4	T. dicoccoides	0.0706	657.3	2231.7	0.6769	0.0212	0.0314	2.41538
TraesCS2B02G304400.1	TRIDC2BG044600.2	T. dicoccoides	0.0495	211.4	787.6	0.2716	0.0105	0.0388	2.98462
TraesCS2B02G313600.1	TRIDC3BG011620.2	T. dicoccoides	0.0469	220.5	775.5	0.4333	0.0121	0.028	2.15385
TraesCS2B02G323500.1	TRIDC2BG047220.2	T. dicoccoides	0.0095	220.6	427.4	0.5156	0.0024	0.0046	0.353846
TraesCS2B02G328000.1	TRIDC2BG047940.5	T. dicoccoides	0.0157	212.8	393.2	0.2437	0.0025	0.0103	0.792308
TraesCS2B02G332100.1	TRIDC2BG048520.2	T. dicoccoides	0.0125	241.1	1006.9	0.0572	0.001	0.0175	1.34615
TraesCS2B02G340200.1	TRIDC2BG049660.1	T. dicoccoides	0.009	237.6	1127.4	0.0692	0.0009	0.0129	0.992308
TraesCS2B02G344000.1	TRIDC2BG050100.7	T. dicoccoides	0.0553	159.2	560.8	0.6871	0.0167	0.0244	1.87692
TraesCS2B02G351000.1	TRIDC2BG050920.1	T. dicoccoides	0.0057	93.5	959.5	0.099	0.0011	0.0106	0.815385
TraesCS2B02G351600.1	TRIDC2BG051000.2	T. dicoccoides	0.0034	369.7	1403.3	0.2638	0.0007	0.0027	0.207692
TraesCS2B02G355300.1	TRIDC2BG051860.1	T. dicoccoides	0.1363	207.5	641.5	0.7875	0.0426	0.0541	4.16154
TraesCS2B02G355400.1	TRIDC2BG051840.3	T. dicoccoides	0.0056	382.2	706.8	0.5271	0.0014	0.0027	0.207692
TraesCS2B02G355500.1	TRIDC2BG051840.3	T. dicoccoides	0.193	276.5	779.5	0.8645	0.0618	0.0715	5.5
TraesCS2B02G355600.1	TRIDC2BG051830.1	T. dicoccoides	0.0136	325.6	790.4	1.5555	0.005	0.0032	0.246154
TraesCS2B02G355700.1	TRIDC2BG051830.1	T. dicoccoides	0.4423	178.7	553.3	0.6418	0.1298	0.2022	15.5538
TraesCS2B02G359200.1	TRIDC2BG051440.1	T. dicoccoides	0.4731	78.4	491.6	0.6301	0.1459	0.2316	17.8154
TraesCS2B02G378100.1	TRIDC2BG055290.1	T. dicoccoides	0.0047	384.1	1586.9	0.1192	0.0006	0.0054	0.415385
TraesCS2B02G378700.1	TRIDC2BG055380.1	T. dicoccoides	0.0083	87	630	0.1428	0.0016	0.0113	0.869231
TraesCS2B02G381700.1	TRIDC2BG055700.1	T. dicoccoides	0.0793	156.6	959.4	0.1754	0.0159	0.0908	6.98462
TraesCS2B02G381800.1	TRIDC2BG055710.2	T. dicoccoides	0.0079	111.1	662.9	0.1638	0.0015	0.0093	0.715385
TraesCS2B02G387700.1	TRIDC2BG056440.2	T. dicoccoides	0.0186	99	723	0.2012	0.0042	0.0209	1.60769
TraesCS2B02G387800.1	TRIDC2BG056460.1	T. dicoccoides	0.0187	90.3	746.7	0.0757	0.0027	0.0355	2.73077
TraesCS2B02G390800.1	TRIDC2BG056800.1	T. dicoccoides	0.0124	261.7	968.3	1.0741	0.0042	0.0039	0.3
TraesCS2B02G392900.1	TRIDC2BG057100.1	T. dicoccoides	0.0798	82.5	526.5	0.0939	0.0115	0.1227	9.43846
TraesCS2B02G399200.1	TRIDC2BG057890.4	T. dicoccoides	0.0111	53.2	780.8	0.1254	0.0026	0.0205	1.57692
TraesCS2B02G405700.1	TRIDC2BG058680.2	T. dicoccoides	0.0092	119	544	0.2178	0.0019	0.0085	0.653846
TraesCS2B02G410200.1	TRIDC2BG059510.2	T. dicoccoides	0.0071	364.5	922.5	0.7549	0.0022	0.0029	0.223077
TraesCS2B02G410400.1	TRIDC2BG059530.1	T. dicoccoides	0.0087	105.2	581.8	0.1842	0.0017	0.0094	0.723077
TraesCS2B02G413500.1	TRIDC2BG060090.1	T. dicoccoides	0.0037	356.2	1269.8	0.2807	0.0008	0.0028	0.215385
TraesCS2B02G417500.1	TRIDC2BG060680.1	T. dicoccoides	0.1728	112.5	511.5	0.8354	0.0556	0.0666	5.12308
TraesCS2B02G419200.1	TRIDC2BG060870.1	T. dicoccoides	0.0078	578.7	1767.3	0.3196	0.0017	0.0053	0.407692
TraesCS2B02G420900.1	TRIDC2BG061170.1	T. dicoccoides	0.0104	200.1	678.9	0.5686	0.003	0.0052	0.4
TraesCS2B02G422300.1	TRIDC2BG061400.1	T. dicoccoides	0.0062	235.4	748.6	0.3108	0.0013	0.0043	0.330769
TraesCS2B02G422400.1	TRIDC2BG061420.3	T. dicoccoides	0.0193	176.8	780.2	0.4267	0.0052	0.0121	0.930769
TraesCS2B02G428000.1	TRIDC2BG062210.1	T. dicoccoides	0.0125	416.9	1302.1	0.239	0.0023	0.0098	0.753846
TraesCS2B02G440900.1	TRIDC2BG064320.4	T. dicoccoides	0.0124	167	592	0.1363	0.0017	0.0127	0.976923
TraesCS2B02G448100.1	TRIDC2BG065430.1	T. dicoccoides	0.0185	108.7	548.3	0.6412	0.0056	0.0088	0.676923
TraesCS2B02G454300.1	TRIDC2BG066270.2	T. dicoccoides	0.0065	177.8	761.2	0.229	0.0013	0.0058	0.446154
TraesCS2B02G458400.1	TRIDC2BG066890.4	T. dicoccoides	0.0132	165.1	995.9	0.241	0.003	0.0126	0.969231
TraesCS2B02G459800.1	TRIDC2BG067020.2	T. dicoccoides	0.0087	168.1	533.9	0.3099	0.0019	0.0061	0.469231
TraesCS2B02G463800.1	TRIDC2BG067520.2	T. dicoccoides	0.0088	400.3	1000.7	0.3895	0.002	0.0052	0.4
TraesCS2B02G466400.1	TRIDC2BG067930.3	T. dicoccoides	0.1126	164	901	0.3597	0.0295	0.0819	6.3
TraesCS2B02G466500.1	TRIDC2BG067940.4	T. dicoccoides	0.0058	162.7	920.3	0.1639	0.0011	0.0066	0.507692
TraesCS2B02G467700.1	TRIDC2BG068120.1	T. dicoccoides	0.0158	184.6	784.4	0.9466	0.0052	0.0055	0.423077
TraesCS2B02G469700.1	TRIDC2BG068290.2	T. dicoccoides	0.0093	92.4	870.6	0.0532	0.0012	0.0216	1.66154
TraesCS2B02G469800.1	TRIDC2BG068290.2	T. dicoccoides	0.0093	92.4	870.6	0.0532	0.0012	0.0216	1.66154
TraesCS2B02G470500.1	TRIDC2BG068370.1	T. dicoccoides	0.0115	26.6	519.4	0.048	0.002	0.0408	3.13846
TraesCS2B02G481900.1	TRIDC2BG070230.1	T. dicoccoides	0.0467	207.6	1262.4	0.0468	0.004	0.0859	6.60769
TraesCS2B02G482400.1	TRIDC2BG070310.2	T. dicoccoides	0.0075	186	615	0.3001	0.0016	0.0054	0.415385
TraesCS2B02G483300.1	TRIDC2BG070520.1	T. dicoccoides	0.0822	95.8	459.2	0.0145	0.0022	0.1484	11.4154
TraesCS2B02G485200.1	TRIDC2BG070890.1	T. dicoccoides	0.1656	87	411	0.4312	0.0449	0.104	8
TraesCS2B02G487800.1	TRIDC2BG071190.1	T. dicoccoides	0.1466	266.8	870.2	0.3829	0.0355	0.0926	7.12308
TraesCS2B02G489900.1	TRIDC2BG071350.1	T. dicoccoides	0.0405	58.5	343.5	0.1001	0.0058	0.0585	4.5
TraesCS2B02G494900.1	TRIDC2BG071930.1	T. dicoccoides	0.0144	86.6	546.4	0.0782	0.0018	0.0235	1.80769
TraesCS2B02G519200.1	TRIDC2BG074990.2	T. dicoccoides	0.0066	700.1	2146.9	0.1527	0.0009	0.0061	0.469231
TraesCS2B02G534000.1	TRIDC2BG077040.2	T. dicoccoides	0.0105	285.5	1154.5	0.0628	0.0009	0.0141	1.08462
TraesCS2B02G542300.1	TRIDC2BG078210.2	T. dicoccoides	0.0159	47	688	0.0747	0.003	0.0396	3.04615
TraesCS2B02G542400.1	TRIDC2BG078260.3	T. dicoccoides	0.0265	214.6	1138.4	0.0177	0.0009	0.0509	3.91538
TraesCS2B02G543700.1	TRIDC2BG078430.1	T. dicoccoides	0.1268	123.7	467.3	0.8322	0.0405	0.0487	3.74615
TraesCS2B02G543800.1	TRIDC2BG078430.1	T. dicoccoides	0.0715	134.4	474.6	0.2876	0.0154	0.0536	4.12308
TraesCS2B02G550800.1	TRIDC2BG079490.1	T. dicoccoides	0.0535	37.9	250.1	0.2211	0.0122	0.0551	4.23846
TraesCS2B02G556600.1	TRIDC2BG080450.2	T. dicoccoides	0.0131	132.5	1085.5	0.0746	0.0019	0.0249	1.91538
TraesCS2B02G578700.1	TRIDC2BG083690.1	T. dicoccoides	0.0132	687.4	1391.6	1.7265	0.0051	0.003	0.230769
TraesCS2B02G583800.1	TRIDC2BG084520.2	T. dicoccoides	0.0114	204.4	857.6	0.7177	0.0035	0.0049	0.376923
TraesCS2B02G589800.1	TRIDC2BG085500.1	T. dicoccoides	0.0151	250.5	754.5	1.2641	0.0053	0.0042	0.323077
TraesCS2B02G618400.1	TRIDC2BG090570.3	T. dicoccoides	0.2545	199.6	556.4	1.1219	0.0873	0.0778	5.98462
TraesCS2B02G618600.1	TRIDC2BG090580.2	T. dicoccoides	0.1643	154	422	0.6783	0.0486	0.0717	5.51538
TraesCS2D02G004100.1	EMT06298	Ae. tauschii	0.3439	125.8	639.2	0.6967	0.107	0.1536	11.8154
TraesCS2D02G031400.1	EMT12459	Ae. tauschii	0.3513	277.8	892.2	0.9181	0.1147	0.1249	9.60769
TraesCS2D02G039800.1	EMT19193	Ae. tauschii	0.0215	123.7	461.3	0.0861	0.0022	0.0256	1.96923
TraesCS2D02G051000.1	EMT19399	Ae. tauschii	0.0336	150.2	590.8	0.2387	0.0068	0.0285	2.19231
TraesCS2D02G055700.1	EMT25773	Ae. tauschii	0.0079	171.3	617.7	0.2567	0.0016	0.0063	0.484615
TraesCS2D02G061500.1	EMT03563	Ae. tauschii	0.008	304.5	856.5	0.1696	0.0012	0.0069	0.530769
TraesCS2D02G061600.1	EMT03564	Ae. tauschii	0.0057	356.3	723.7	0.488	0.0014	0.0029	0.223077
TraesCS2D02G088100.1	EMT30943	Ae. tauschii	0.06	111.7	467.3	0.1262	0.0086	0.0679	5.22308
TraesCS2D02G096800.1	EMT24705	Ae. tauschii	0.0667	192.1	689.9	0.595	0.0194	0.0325	2.5
TraesCS2D02G100100.1	EMT14894	Ae. tauschii	0.0817	207.8	776.2	0.5382	0.0231	0.0428	3.29231
TraesCS2D02G100300.1	EMT03738	Ae. tauschii	0.1336	387.5	1061.5	0.9644	0.0441	0.0457	3.51538
TraesCS2D02G101300.1	EMT28157	Ae. tauschii	0.1291	117	816	0.2985	0.0332	0.1113	8.56154
TraesCS2D02G101400.1	EMT28859	Ae. tauschii	0.1131	110.6	948.4	0.3047	0.0304	0.0999	7.68462
TraesCS2D02G104500.1	EMT18192	Ae. tauschii	0.3641	229.7	814.3	0.3472	0.0858	0.2472	19.0154
TraesCS2D02G104700.1	EMT00562	Ae. tauschii	0.1865	212.3	795.7	0.2679	0.0395	0.1473	11.3308
TraesCS2D02G105400.1	EMT03280	Ae. tauschii	0.5488	192.2	575.8	0.704	0.1655	0.2351	18.0846
TraesCS2D02G117000.1	EMT18734	Ae. tauschii	0.0102	222.2	680.8	0.161	0.0015	0.0092	0.707692
TraesCS2D02G119100.1	EMT22828	Ae. tauschii	0.0051	236.6	957.4	0.2446	0.0011	0.0043	0.330769
TraesCS2D02G125000.1	EMT02183	Ae. tauschii	0.019	515.2	1248.8	0.4932	0.0049	0.0099	0.761538
TraesCS2D02G146100.1	EMT01400	Ae. tauschii	0.0866	412.3	1303.7	0.8267	0.0275	0.0332	2.55385
TraesCS2D02G148000.1	EMT26046	Ae. tauschii	0.4013	406.6	1120.4	0.5531	0.1101	0.199	15.3077
TraesCS2D02G151200.1	EMT05224	Ae. tauschii	0.092	42.9	263.1	0.3199	0.0236	0.0738	5.67692
TraesCS2D02G158200.1	EMT33356	Ae. tauschii	0.2136	84.8	695.2	0.1658	0.046	0.2777	21.3615
TraesCS2D02G158300.1	EMT33356	Ae. tauschii	0.0523	79.2	703.8	0.0903	0.0086	0.0956	7.35385
TraesCS2D02G158500.1	EMT24022	Ae. tauschii	0.1552	100.5	529.5	1.1786	0.053	0.045	3.46154
TraesCS2D02G167000.1	EMT00181	Ae. tauschii	0.0447	126.8	563.2	0.4748	0.0124	0.0261	2.00769
TraesCS2D02G169900.1	EMT16107	Ae. tauschii	0.0051	682.1	2275.9	1.1187	0.0017	0.0016	0.123077
TraesCS2D02G195100.1	EMT21368	Ae. tauschii	0.2424	427.3	1216.7	0.6935	0.0725	0.1045	8.03846
TraesCS2D02G209600.1	EMT21654	Ae. tauschii	0.1269	128.2	855.8	0.2249	0.0292	0.1298	9.98462
TraesCS2D02G211600.1	EMT02182	Ae. tauschii	0.1297	651	2055	0.726	0.0396	0.0546	4.2
TraesCS2D02G221200.1	EMT07811	Ae. tauschii	0.2018	187.1	565.9	1.1841	0.07	0.0591	4.54615
TraesCS2D02G231600.1	EMT30658	Ae. tauschii	0.3052	87.5	503.5	0.386	0.0824	0.2133	16.4077
TraesCS2D02G234000.1	EMT28511	Ae. tauschii	0.0053	232.5	913.5	0.2566	0.0011	0.0043	0.330769
TraesCS2D02G246600.1	EMT30439	Ae. tauschii	0.0116	201.5	590.5	0.6521	0.0034	0.0052	0.4
TraesCS2D02G254400.1	EMT30687	Ae. tauschii	0.4607	154.5	517.5	0.8689	0.1484	0.1708	13.1385
TraesCS2D02G256400.1	EMT23454	Ae. tauschii	0.3013	85.9	442.1	0.2839	0.0712	0.2507	19.2846
TraesCS2D02G256600.1	EMT14419	Ae. tauschii	0.0237	252.2	1418.8	0.588	0.0071	0.0121	0.930769
TraesCS2D02G259200.1	EMT08108	Ae. tauschii	0.0998	237.7	824.3	0.5669	0.0284	0.0501	3.85385
TraesCS2D02G262100.1	EMT33560	Ae. tauschii	0.025	162.6	692.4	0.5957	0.0074	0.0124	0.953846
TraesCS2D02G274600.1	EMT20350	Ae. tauschii	0.0989	227.2	1002.8	0.5721	0.029	0.0506	3.89231
TraesCS2D02G282200.1	EMT24518	Ae. tauschii	0.2629	38.2	174.8	0.6067	0.0785	0.1294	9.95385
TraesCS2D02G282800.1	EMT24284	Ae. tauschii	0.0218	705.5	2375.5	0.8606	0.007	0.0081	0.623077
TraesCS2D02G289700.1	EMT06403	Ae. tauschii	0.0833	309	810	0.6979	0.0248	0.0355	2.73077
TraesCS2D02G295300.1	EMT13744	Ae. tauschii	0.0972	179.9	654.1	0.7437	0.0302	0.0406	3.12308
TraesCS2D02G305300.1	EMT15405	Ae. tauschii	0.0828	146	451	0.8559	0.0265	0.031	2.38462
TraesCS2D02G306100.1	EMT05816	Ae. tauschii	0.4452	234.1	647.9	1.0894	0.1517	0.1393	10.7154
TraesCS2D02G307600.1	EMT27061	Ae. tauschii	0.2356	465.7	1343.3	0.8796	0.0758	0.0862	6.63077
TraesCS2D02G317100.1	EMT20919	Ae. tauschii	0.0293	203	631	0.8569	0.0094	0.0109	0.838462
TraesCS2D02G334300.1	EMT32940	Ae. tauschii	0.5932	79.8	505.2	0.7464	0.189	0.2532	19.4769
TraesCS2D02G334400.1	EMT32940	Ae. tauschii	0.0352	83.7	531.3	0.2003	0.0076	0.0379	2.91538
TraesCS2D02G334500.1	EMT32940	Ae. tauschii	0.5939	72.7	431.3	0.6851	0.1857	0.271	20.8462
TraesCS2D02G334600.1	EMT32940	Ae. tauschii	0.0763	81.9	533.1	0.2182	0.0172	0.0789	6.06923
TraesCS2D02G336300.1	EMT32184	Ae. tauschii	0.1045	307.8	907.2	1.108	0.0357	0.0322	2.47692
TraesCS2D02G336400.1	EMT01861	Ae. tauschii	0.7121	272	811	0.7956	0.223	0.2803	21.5615
TraesCS2D02G343200.1	EMT22755	Ae. tauschii	0.2676	180.9	629.1	1.0036	0.0893	0.0889	6.83846
TraesCS2D02G350400.1	EMT20012	Ae. tauschii	0.0369	648.3	2165.7	0.9202	0.0121	0.0131	1.00769
TraesCS2D02G357600.1	EMT06985	Ae. tauschii	0.0303	305	1408	1.3518	0.0106	0.0078	0.6
TraesCS2D02G361600.1	EMT22736	Ae. tauschii	0.3826	92.8	531.2	0.3348	0.0984	0.294	22.6154
TraesCS2D02G366900.1	EMT27607	Ae. tauschii	0.111	128.4	720.6	0.4656	0.0315	0.0677	5.20769
TraesCS2D02G378400.1	EMT12739	Ae. tauschii	0.0126	88.9	679.1	0.0589	0.0015	0.025	1.92308
TraesCS2D02G382700.1	EMT07786	Ae. tauschii	0.0384	133.9	673.1	0.4264	0.0105	0.0245	1.88462
TraesCS2D02G386100.1	EMT30068	Ae. tauschii	0.2239	176.5	960.5	0.2636	0.0521	0.1975	15.1923
TraesCS2D02G387300.1	EMT19543	Ae. tauschii	0.045	48.5	362.5	0.5754	0.0138	0.024	1.84615
TraesCS2D02G390000.1	EMT27370	Ae. tauschii	0.0802	342.2	977.8	0.5729	0.0224	0.0391	3.00769
TraesCS2D02G398600.1	EMT03247	Ae. tauschii	0.0526	514.5	1717.5	0.5462	0.0147	0.0269	2.06923
TraesCS2D02G400300.1	EMT24550	Ae. tauschii	0.2838	282.9	1310.1	0.4631	0.0785	0.1694	13.0308
TraesCS2D02G401300.1	EMT08870	Ae. tauschii	0.1401	102	390	1.1757	0.0482	0.041	3.15385
TraesCS2D02G412200.1	EMT14137	Ae. tauschii	0.3594	81	375	0.3448	0.0896	0.2598	19.9846
TraesCS2D02G431000.1	EMT29238	Ae. tauschii	0.0295	84	450	0.1156	0.0045	0.0386	2.96923
TraesCS2D02G433900.1	EMT03319	Ae. tauschii	0.3517	180.2	638.8	0.7046	0.1073	0.1523	11.7154
TraesCS2D02G441800.1	EMT07628	Ae. tauschii	0.0044	472.1	928.9	0.5098	0.0011	0.0022	0.169231
TraesCS2D02G442200.1	EMT27094	Ae. tauschii	0.2551	158.8	756.2	0.4515	0.0702	0.1556	11.9692
TraesCS2D02G446000.1	EMT08335	Ae. tauschii	0.0221	151.4	709.6	0.0399	0.0014	0.0353	2.71538
TraesCS2D02G446500.1	EMT02284	Ae. tauschii	0.0383	169	800	0.1462	0.0063	0.0433	3.33077
TraesCS2D02G448000.1	EMT20093	Ae. tauschii	0.0133	106.5	619.5	0.0775	0.0016	0.0208	1.6
TraesCS2D02G456900.1	EMT17444	Ae. tauschii	0.0051	315.3	872.7	0.3761	0.0012	0.0031	0.238462
TraesCS2D02G460000.1	EMT33773	Ae. tauschii	0.257	178.9	868.1	0.5342	0.0746	0.1396	10.7385
TraesCS2D02G461900.1	EMT32833	Ae. tauschii	0.1494	86.9	384.1	0.4322	0.0401	0.0928	7.13846
TraesCS2D02G464400.1	EMT19198	Ae. tauschii	0.2637	122.9	633.1	0.2481	0.0589	0.2373	18.2538
TraesCS2D02G464600.1	EMT19198	Ae. tauschii	0.0453	107.9	648.1	0.1909	0.0094	0.0492	3.78462
TraesCS2D02G473700.1	EMT02636	Ae. tauschii	0.2435	330.7	1922.3	0.2345	0.0549	0.234	18
TraesCS2D02G474100.1	EMT00295	Ae. tauschii	0.0199	604.2	1504.8	0.7172	0.006	0.0083	0.638462
TraesCS2D02G491200.1	EMT31390	Ae. tauschii	0.0065	721.6	2140.4	0.3178	0.0014	0.0044	0.338462
TraesCS2D02G497600.1	EMT12694	Ae. tauschii	0.5011	271	773	0.6358	0.1454	0.2287	17.5923
TraesCS2D02G502900.1	EMT13358	Ae. tauschii	0.2109	111.9	482.1	0.5891	0.0621	0.1055	8.11538
TraesCS2D02G503100.1	EMT28801	Ae. tauschii	0.0359	66	384	0.0397	0.0026	0.0662	5.09231
TraesCS2D02G506500.1	EMT02119	Ae. tauschii	0.0171	260.4	1167.6	0.1331	0.0026	0.0196	1.50769
TraesCS2D02G515600.1	EMT29255	Ae. tauschii	0.0215	132	573	0.1539	0.0035	0.023	1.76923
TraesCS2D02G517000.1	EMT09813	Ae. tauschii	0.352	166.8	592.2	0.8789	0.1139	0.1296	9.96923
TraesCS2D02G526200.1	EMT28175	Ae. tauschii	0.2161	170.2	534.8	1.1032	0.0737	0.0668	5.13846
TraesCS2D02G529000.1	EMT04981	Ae. tauschii	0.0909	167.6	1104.4	0.4955	0.0267	0.0539	4.14615
TraesCS2D02G536800.1	EMT25969	Ae. tauschii	0.3974	83	478	0.531	0.1172	0.2206	16.9692
TraesCS2D02G563200.1	EMT14108	Ae. tauschii	0.2824	53.5	297.5	0.3058	0.0699	0.2287	17.5923
TraesCS2D02G563300.1	EMT31884	Ae. tauschii	0.0271	177.4	614.6	0.7129	0.0083	0.0116	0.892308
TraesCS2D02G575600.1	EMT25332	Ae. tauschii	0.0254	449.3	1242.7	0.6415	0.0074	0.0115	0.884615
TraesCS2D02G576200.1	EMT32451	Ae. tauschii	0.0744	156.1	764.9	0.4903	0.0211	0.043	3.30769
TraesCS2D02G576300.1	EMT32450	Ae. tauschii	0.1073	168.9	773.1	0.082	0.0119	0.145	11.1538
TraesCS3A02G000400.1	TRIUR301157-P1	T. urartu	0.2451	75.4	455.6	0.1655	0.0476	0.2878	22.1385
TraesCS3A02G000600.1	TRIUR314872-P1	T. urartu	0.0418	63.8	575.2	0.0142	0.0018	0.1236	9.50769
TraesCS3A02G000800.1	TRIUR327194-P1	T. urartu	0.0293	157.2	472.8	0.3486	0.0067	0.0191	1.46923
TraesCS3A02G006300.1	TRIUR311692-P1	T. urartu	0.0865	178.2	643.8	0.0964	0.0095	0.0986	7.58462
TraesCS3A02G028200.1	TRIUR312568-P1	T. urartu	0.0374	109.6	631.4	0.5828	0.0113	0.0193	1.48462
TraesCS3A02G046800.1	TRIUR320385-P1	T. urartu	0.186	143.3	405.7	0.5508	0.0511	0.0928	7.13846
TraesCS3A02G056100.1	TRIUR309932-P1	T. urartu	0.2816	74.5	411.5	0.73	0.0888	0.1217	9.36154
TraesCS3A02G057900.1	TRIUR323651-P1	T. urartu	0.0249	180	801	1.5506	0.0089	0.0057	0.438462
TraesCS3A02G058000.1	TRIUR323651-P1	T. urartu	0.0271	164.5	735.5	1.5415	0.0097	0.0063	0.484615
TraesCS3A02G067900.1	TRIUR306561-P1	T. urartu	0.3762	521.7	1542.3	0.4327	0.0942	0.2177	16.7462
TraesCS3A02G068000.1	TRIUR306560-P1	T. urartu	0.0059	589	1481	0.3849	0.0014	0.0035	0.269231
TraesCS3A02G073500.1	TRIUR334876-P1	T. urartu	0.0719	139.8	634.2	0.7467	0.0226	0.0302	2.32308
TraesCS3A02G077900.1	TRIUR323644-P1	T. urartu	0.0288	169.1	472.9	1.6718	0.0107	0.0064	0.492308
TraesCS3A02G078400.1	TRIUR316902-P1	T. urartu	0.2737	153	882	0.2661	0.0648	0.2435	18.7308
TraesCS3A02G093200.1	TRIUR310339-P1	T. urartu	0.3285	66.3	317.7	0.4101	0.0877	0.2139	16.4538
TraesCS3A02G094300.1	TRIUR334833-P1	T. urartu	0.0439	100.4	472.6	0.068	0.0043	0.0632	4.86154
TraesCS3A02G099200.1	TRIUR317973-P1	T. urartu	0.3642	210.2	623.8	1.205	0.1268	0.1053	8.1
TraesCS3A02G102600.1	TRIUR307421-P1	T. urartu	0.1576	175.9	583.1	0.2163	0.0285	0.132	10.1538
TraesCS3A02G102900.1	TRIUR321807-P1	T. urartu	0.0122	171.1	572.9	0.5983	0.0035	0.0059	0.453846
TraesCS3A02G104400.1	TRIUR335423-P1	T. urartu	0.0562	200.3	1026.7	0.1857	0.0109	0.0588	4.52308
TraesCS3A02G107400.1	TRIUR331341-P1	T. urartu	0.2317	231.3	1079.7	0.3919	0.0606	0.1547	11.9
TraesCS3A02G109300.1	TRIUR312855-P1	T. urartu	0.3914	200.8	570.2	0.892	0.1265	0.1418	10.9077
TraesCS3A02G112300.1	TRIUR327662-P1	T. urartu	0.0559	655.7	2395.3	0.5502	0.0159	0.0288	2.21538
TraesCS3A02G112400.1	TRIUR330765-P1	T. urartu	0.1169	165.1	446.9	0.9286	0.0382	0.0411	3.16154
TraesCS3A02G115000.1	TRIUR327054-P1	T. urartu	0.0385	219.6	623.4	0.1337	0.0048	0.0357	2.74615
TraesCS3A02G119200.1	TRIUR329318-P1	T. urartu	0.0929	170.3	372.7	0.7314	0.0278	0.038	2.92308
TraesCS3A02G123700.1	TRIUR314704-P1	T. urartu	0.3158	144.2	809.8	0.3658	0.0834	0.228	17.5385
TraesCS3A02G135900.1	TRIUR320025-P1	T. urartu	0.2122	38.5	246.5	0.2098	0.0469	0.2234	17.1846
TraesCS3A02G139000.1	TRIUR313720-P1	T. urartu	0.0339	180.8	554.2	0.3536	0.0078	0.022	1.69231
TraesCS3A02G153700.1	TRIUR324658-P1	T. urartu	0.0755	682.7	2263.3	0.7704	0.0236	0.0306	2.35385
TraesCS3A02G154300.1	TRIUR320025-P1	T. urartu	0.2322	41.9	243.1	0.1624	0.044	0.2709	20.8385
TraesCS3A02G157500.1	TRIUR328399-P1	T. urartu	0.1983	392.9	1212.1	0.9213	0.0648	0.0703	5.40769
TraesCS3A02G158600.1	TRIUR313265-P1	T. urartu	0.0083	611.9	1230.1	0.3351	0.0017	0.005	0.384615
TraesCS3A02G159200.1	TRIUR328704-P1	T. urartu	0.0262	441.3	1556.7	0.4798	0.0071	0.0147	1.13077
TraesCS3A02G159600.1	TRIUR319333-P1	T. urartu	0.0094	758	1852	0.6655	0.0027	0.0041	0.315385
TraesCS3A02G167200.1	TRIUR331797-P1	T. urartu	0.2425	292.5	1402.5	0.2896	0.0568	0.1961	15.0846
TraesCS3A02G176500.1	TRIUR325713-P1	T. urartu	0.07	333.4	1166.6	0.8014	0.0221	0.0276	2.12308
TraesCS3A02G178700.1	TRIUR335231-P1	T. urartu	0.2084	300.7	863.3	0.834	0.0661	0.0792	6.09231
TraesCS3A02G179200.1	TRIUR326979-P1	T. urartu	0.0264	387.1	1004.9	1.087	0.009	0.0083	0.638462
TraesCS3A02G180600.1	TRIUR307552-P1	T. urartu	0.0103	519	972	0.3473	0.0021	0.006	0.461538
TraesCS3A02G189600.1	TRIUR322971-P1	T. urartu	0.0195	376.6	1051.4	0.4173	0.0047	0.0114	0.876923
TraesCS3A02G200300.1	TRIUR327020-P1	T. urartu	0.017	113.9	792.1	0.2084	0.0038	0.0184	1.41538
TraesCS3A02G204800.1	TRIUR320544-P1	T. urartu	0.0616	130.9	748.1	0.294	0.0151	0.0514	3.95385
TraesCS3A02G205900.1	TRIUR319274-P1	T. urartu	0.0399	454.1	1384.9	0.8726	0.0128	0.0147	1.13077
TraesCS3A02G207300.1	TRIUR328638-P1	T. urartu	0.0696	131.2	576.8	0.7984	0.0222	0.0278	2.13846
TraesCS3A02G209800.1	TRIUR324021-P1	T. urartu	0.091	105.8	476.2	0.5633	0.0266	0.0472	3.63077
TraesCS3A02G211500.1	TRIUR308672-P1	T. urartu	0.0174	225.1	656.9	0.2213	0.0031	0.0138	1.06154
TraesCS3A02G219300.1	TRIUR319962-P1	T. urartu	0.0085	133.4	592.6	0.2179	0.0017	0.0078	0.6
TraesCS3A02G221900.1	TRIUR327404-P1	T. urartu	0.1047	336.2	1172.8	1.2734	0.0367	0.0288	2.21538
TraesCS3A02G223800.1	TRIUR320025-P1	T. urartu	0.2614	83.4	465.6	0.2912	0.0636	0.2184	16.8
TraesCS3A02G229500.1	TRIUR325064-P1	T. urartu	0.0713	38.3	309.7	0.2174	0.017	0.0783	6.02308
TraesCS3A02G231600.1	TRIUR327997-P1	T. urartu	0.032	108.1	557.9	0.8248	0.0103	0.0125	0.961538
TraesCS3A02G245900.1	TRIUR327393-P1	T. urartu	0.0243	176.4	831.6	0.2095	0.0049	0.0233	1.79231
TraesCS3A02G246000.1	TRIUR324520-P1	T. urartu	0.1068	454.1	1468.9	0.7543	0.0331	0.0438	3.36923
TraesCS3A02G247500.1	TRIUR322118-P1	T. urartu	0.0176	129.2	722.8	0.1226	0.0028	0.0229	1.76154
TraesCS3A02G248700.1	TRIUR333662-P1	T. urartu	0.1025	65.3	270.7	0.6352	0.0307	0.0484	3.72308
TraesCS3A02G252000.1	TRIUR324442-P1	T. urartu	0.2309	105.4	383.6	1.0055	0.0771	0.0766	5.89231
TraesCS3A02G268500.1	TRIUR322279-P1	T. urartu	0.6799	151	551	0.7998	0.2151	0.2689	20.6846
TraesCS3A02G273300.1	TRIUR312195-P1	T. urartu	0.1034	520.3	1858.7	0.7725	0.0324	0.0419	3.22308
TraesCS3A02G280400.1	TRIUR307596-P1	T. urartu	0.0092	105.6	560.4	0.1844	0.0018	0.0098	0.753846
TraesCS3A02G280800.1	TRIUR319198-P1	T. urartu	0.1304	104.1	603.9	0.3685	0.0347	0.0942	7.24615
TraesCS3A02G285500.1	TRIUR311727-P1	T. urartu	0.0202	623.2	1479.8	0.422	0.0048	0.0113	0.869231
TraesCS3A02G285800.1	TRIUR324313-P1	T. urartu	0.3205	180.5	839.5	0.3589	0.0812	0.2262	17.4
TraesCS3A02G286600.1	TRIUR325771-P1	T. urartu	0.0291	173.3	669.7	0.7452	0.0091	0.0121	0.930769
TraesCS3A02G289200.1	TRIUR330232-P1	T. urartu	0.09	304	929	1.0693	0.0305	0.0285	2.19231
TraesCS3A02G292400.1	TRIUR335254-P1	T. urartu	0.0333	502.3	1246.7	0.7663	0.0102	0.0133	1.02308
TraesCS3A02G293700.1	TRIUR319907-P1	T. urartu	0.017	73.8	481.2	0.0704	0.0021	0.0292	2.24615
TraesCS3A02G304800.1	TRIUR322385-P1	T. urartu	0.7109	294	1020	0.7363	0.2194	0.298	22.9231
TraesCS3A02G308500.1	TRIUR306252-P1	T. urartu	0.0957	134.2	552.8	0.4518	0.0258	0.0571	4.39231
TraesCS3A02G310500.1	TRIUR319080-P1	T. urartu	0.0535	322.3	940.7	0.9996	0.0178	0.0178	1.36923
TraesCS3A02G310600.1	TRIUR319080-P1	T. urartu	0.3257	302.5	816.5	0.607	0.0924	0.1522	11.7077
TraesCS3A02G310700.1	TRIUR319081-P1	T. urartu	0.3675	395.7	1287.3	0.7359	0.113	0.1535	11.8077
TraesCS3A02G314300.1	TRIUR334584-P1	T. urartu	0.0087	170.5	534.5	0.325	0.0019	0.006	0.461538
TraesCS3A02G318800.1	TRIUR303751-P1	T. urartu	0.0209	63.7	515.3	0.3701	0.0059	0.0159	1.22308
TraesCS3A02G325800.1	TRIUR316941-P1	T. urartu	0.0151	433.4	1588.6	0.6957	0.0046	0.0066	0.507692
TraesCS3A02G334100.1	TRIUR309546-P1	T. urartu	0.0092	393.3	968.7	0.1291	0.001	0.008	0.615385
TraesCS3A02G336500.1	TRIUR327104-P1	T. urartu	0.0948	418.7	1321.3	0.6224	0.0276	0.0443	3.40769
TraesCS3A02G337200.1	TRIUR312792-P1	T. urartu	0.0394	195.8	737.2	0.6574	0.0118	0.018	1.38462
TraesCS3A02G343000.1	TRIUR327575-P1	T. urartu	0.0118	203.2	561.8	0.189	0.0018	0.0097	0.746154
TraesCS3A02G343700.1	TRIUR317401-P1	T. urartu	0.2807	166.5	640.5	0.5081	0.078	0.1535	11.8077
TraesCS3A02G343900.1	TRIUR317401-P1	T. urartu	0.2247	157.1	661.9	0.5188	0.0636	0.1226	9.43077
TraesCS3A02G346300.1	TRIUR334193-P1	T. urartu	0.109	143.7	606.3	0.8525	0.0352	0.0412	3.16923
TraesCS3A02G347500.1	TRIUR317462-P1	T. urartu	0.0074	162.1	1523.9	0.1018	0.0013	0.013	1
TraesCS3A02G351900.1	TRIUR320025-P1	T. urartu	0.1863	39.1	245.9	0.323	0.0482	0.1493	11.4846
TraesCS3A02G358100.1	TRIUR308856-P1	T. urartu	0.0255	198.4	521.6	0.1943	0.004	0.0204	1.56923
TraesCS3A02G359200.1	TRIUR333469-P1	T. urartu	0.1405	433.4	1372.6	0.8544	0.045	0.0527	4.05385
TraesCS3A02G360300.1	TRIUR323165-P1	T. urartu	0.2041	471.9	1772.1	0.5157	0.0568	0.1101	8.46923
TraesCS3A02G363900.1	TRIUR318920-P1	T. urartu	0.2526	150.8	1052.2	0.2578	0.0619	0.24	18.4615
TraesCS3A02G365200.1	TRIUR308319-P1	T. urartu	0.0071	285.7	581.3	0.4868	0.0018	0.0036	0.276923
TraesCS3A02G367600.1	TRIUR328076-P1	T. urartu	0.0295	67.6	583.4	0.0528	0.0034	0.065	5
TraesCS3A02G368100.1	TRIUR326391-P1	T. urartu	0.0393	75.1	560.9	0.2054	0.009	0.0437	3.36154
TraesCS3A02G371700.1	TRIUR330426-P1	T. urartu	0.0666	220.7	940.3	0.4865	0.0185	0.038	2.92308
TraesCS3A02G371800.1	TRIUR331111-P1	T. urartu	0.0947	257.1	798.9	0.4651	0.0247	0.053	4.07692
TraesCS3A02G371900.1	TRIUR333995-P1	T. urartu	0.1923	289.7	832.3	0.4584	0.0491	0.1071	8.23846
TraesCS3A02G372000.1	TRIUR325578-P1	T. urartu	0.088	278.4	852.6	0.6115	0.0254	0.0415	3.19231
TraesCS3A02G372100.1	TRIUR325578-P1	T. urartu	0.1187	284.3	846.7	1.1068	0.0405	0.0366	2.81538
TraesCS3A02G372200.1	TRIUR333995-P1	T. urartu	0.0929	290.7	852.3	0.5913	0.0264	0.0446	3.43077
TraesCS3A02G372400.1	TRIUR312645-P1	T. urartu	0.3088	258	1029	0.576	0.0897	0.1557	11.9769
TraesCS3A02G375400.1	TRIUR334272-P1	T. urartu	0.1687	152.3	612.7	0.3046	0.0387	0.1269	9.76154
TraesCS3A02G377000.1	TRIUR330192-P1	T. urartu	0.1355	158.7	828.3	0.2725	0.0316	0.116	8.92308
TraesCS3A02G377700.1	TRIUR333147-P1	T. urartu	0.2002	187.8	673.2	1.0053	0.0668	0.0665	5.11538
TraesCS3A02G381900.1	TRIUR313796-P1	T. urartu	0.0123	443	1069	0.1986	0.0019	0.0095	0.730769
TraesCS3A02G393100.1	TRIUR334250-P1	T. urartu	0.3241	155.8	687.2	0.2908	0.0745	0.256	19.6923
TraesCS3A02G393200.1	TRIUR334250-P1	T. urartu	0.3124	167	769	0.3388	0.0772	0.228	17.5385
TraesCS3A02G395000.1	TRIUR333816-P1	T. urartu	0.0195	81.7	551.3	0.3983	0.0054	0.0136	1.04615
TraesCS3A02G395500.1	TRIUR312123-P1	T. urartu	0.0204	374.7	1425.3	0.2617	0.0043	0.0163	1.25385
TraesCS3A02G402300.1	TRIUR332863-P1	T. urartu	0.1439	93.4	587.6	0.3211	0.0372	0.1158	8.90769
TraesCS3A02G403300.1	TRIUR328413-P1	T. urartu	0.2685	73.3	562.7	0.4027	0.0764	0.1898	14.6
TraesCS3A02G405100.1	TRIUR302309-P1	T. urartu	0.0739	102.8	740.2	0.3455	0.02	0.0579	4.45385
TraesCS3A02G406000.1	TRIUR314109-P1	T. urartu	0.0248	19.4	487.6	0.1048	0.0062	0.0596	4.58462
TraesCS3A02G406500.1	TRIUR315782-P1	T. urartu	0.4038	84.1	452.9	0.6025	0.122	0.2025	15.5769
TraesCS3A02G408000.1	TRIUR326381-P1	T. urartu	0.0112	483.6	1172.4	0.3884	0.0025	0.0066	0.507692
TraesCS3A02G414100.1	TRIUR315439-P1	T. urartu	0.0833	332.9	1116.1	0.8457	0.0266	0.0315	2.42308
TraesCS3A02G421400.1	TRIUR306081-P1	T. urartu	0.0417	103.5	805.5	0.1609	0.0087	0.0542	4.16923
TraesCS3A02G423200.1	TRIUR313576-P1	T. urartu	0.1159	302.3	915.7	0.6907	0.0348	0.0503	3.86923
TraesCS3A02G432900.1	TRIUR330872-P1	T. urartu	0.0237	124.1	259.9	1.0029	0.0079	0.0079	0.607692
TraesCS3A02G433300.1	TRIUR322499-P1	T. urartu	0.0379	408.7	1517.3	1.4832	0.0136	0.0091	0.7
TraesCS3A02G434400.1	TRIUR328473-P1	T. urartu	0.0129	106.2	361.8	0.3001	0.0028	0.0094	0.723077
TraesCS3A02G434700.1	TRIUR327077-P1	T. urartu	0.0499	80.5	225.5	0.5335	0.0135	0.0253	1.94615
TraesCS3A02G434900.1	TRIUR328473-P1	T. urartu	0.3314	102.5	365.5	0.4315	0.0857	0.1986	15.2769
TraesCS3A02G435000.1	TRIUR328473-P1	T. urartu	0.3327	120.4	347.6	0.5462	0.0914	0.1673	12.8692
TraesCS3A02G440600.1	TRIUR310349-P1	T. urartu	0.0081	172.5	589.5	0.2736	0.0017	0.0062	0.476923
TraesCS3A02G442000.1	TRIUR317755-P1	T. urartu	0.0199	614.1	1713.9	0.4952	0.0052	0.0106	0.815385
TraesCS3A02G449300.1	TRIUR302890-P1	T. urartu	0.0081	705	1581	0.2141	0.0013	0.0059	0.453846
TraesCS3A02G462000.1	TRIUR312005-P1	T. urartu	0.0246	287.4	708.6	0.6651	0.0072	0.0108	0.830769
TraesCS3A02G462100.1	TRIUR312004-P1	T. urartu	0.0237	259.8	640.2	2.4297	0.0095	0.0039	0.3
TraesCS3A02G473600.1	TRIUR325232-P1	T. urartu	0.0326	517.6	1090.4	0.5681	0.0087	0.0154	1.18462
TraesCS3A02G483200.1	TRIUR314925-P1	T. urartu	0.0151	366.4	1052.6	0.4929	0.004	0.0081	0.623077
TraesCS3A02G483500.1	TRIUR329627-P1	T. urartu	0.018	446.1	1077.9	0.7803	0.0056	0.0071	0.546154
TraesCS3A02G489400.1	TRIUR331002-P1	T. urartu	0.3813	86.4	465.6	0.5957	0.1149	0.1929	14.8385
TraesCS3A02G491500.1	TRIUR331630-P1	T. urartu	0.117	89.4	603.6	0.4381	0.0335	0.0764	5.87692
TraesCS3A02G492000.1	TRIUR330753-P1	T. urartu	0.0729	151.7	934.3	0.2824	0.0179	0.0635	4.88462
TraesCS3A02G527300.1	TRIUR326868-P1	T. urartu	0.017	83.3	459.7	0.3427	0.0044	0.0128	0.984615
TraesCS3A02G527400.1	TRIUR324172-P1	T. urartu	0.0281	245.1	951.9	0.6444	0.0084	0.0131	1.00769
TraesCS3A02G532100.1	TRIUR330678-P1	T. urartu	0.0434	307	830	0.2802	0.0085	0.0305	2.34615
TraesCS3A02G532200.1	TRIUR330678-P1	T. urartu	0.0438	284	781	0.1754	0.0065	0.0369	2.83846
TraesCS3B02G002300.1	TRIDC3BG000320.2	T. dicoccoides	0.015	76.7	541.3	0.0686	0.0019	0.0272	2.09231
TraesCS3B02G003200.1	TRIDC3BG000440.1	T. dicoccoides	0.4501	138.2	485.8	0.395	0.112	0.2836	21.8154
TraesCS3B02G003300.1	TRIDC3BG000440.1	T. dicoccoides	0.2426	146.3	480.7	0.5394	0.0674	0.125	9.61538
TraesCS3B02G039100.1	TRIDC3BG005370.1	T. dicoccoides	0.0078	104.6	678.4	0.1549	0.0015	0.0097	0.746154
TraesCS3B02G064900.1	TRIDC3BG008350.2	T. dicoccoides	0.0141	169.7	898.3	0.2892	0.0034	0.0117	0.9
TraesCS3B02G065000.1	TRIDC3BG008380.1	T. dicoccoides	0.014	117.8	536.2	0.4411	0.0038	0.0086	0.661538
TraesCS3B02G068800.1	TRIDC3BG008960.2	T. dicoccoides	0.1953	38.9	189.1	1.0467	0.0656	0.0627	4.82308
TraesCS3B02G080900.1	TRIDC3BG010910.1	T. dicoccoides	0.4565	446	1327	0.441	0.1154	0.2616	20.1231
TraesCS3B02G081000.1	TRIDC3BG010910.1	T. dicoccoides	0.428	431	1345	0.4332	0.1083	0.25	19.2308
TraesCS3B02G081100.1	TRIDC3BG010910.1	T. dicoccoides	0.0104	460.5	1318.5	0.1674	0.0015	0.0091	0.7
TraesCS3B02G087800.1	TRIDC3BG011840.2	T. dicoccoides	0.0157	94.6	487.4	0.3915	0.0042	0.0107	0.823077
TraesCS3B02G092800.1	TRIDC3BG013080.1	T. dicoccoides	0.0195	119	520	0.2133	0.0039	0.0181	1.39231
TraesCS3B02G092900.1	TRIDC3BG013090.1	T. dicoccoides	0.036	226.6	727.4	0.4817	0.0095	0.0198	1.52308
TraesCS3B02G115400.1	TRIDC3BG016050.27	T. dicoccoides	0.3119	158.8	519.2	1.125	0.1067	0.0949	7.3
TraesCS3B02G120200.1	TRIDC3BG016860.1	T. dicoccoides	0.0938	180.4	578.6	0.5825	0.0267	0.0459	3.53077
TraesCS3B02G125600.1	TRIDC3BG017650.2	T. dicoccoides	0.0157	84.9	1076.1	0.16	0.0038	0.0236	1.81538
TraesCS3B02G126200.1	TRIDC3BG017660.2	T. dicoccoides	0.0139	334.5	982.5	0.334	0.0031	0.0092	0.707692
TraesCS3B02G129900.1	TRIDC3BG018210.1	T. dicoccoides	0.0088	88.5	577.5	0.1638	0.0017	0.0106	0.815385
TraesCS3B02G130000.1	TRIDC3BG018220.2	T. dicoccoides	0.0107	203.6	1206.4	0.1133	0.0017	0.0148	1.13846
TraesCS3B02G131700.1	TRIDC3BG018420.8	T. dicoccoides	0.0477	699.5	2462.5	0.715	0.0146	0.0204	1.56923
TraesCS3B02G135600.1	TRIDC3BG018940.1	T. dicoccoides	0.3181	152.4	1140.6	0.2778	0.0812	0.2923	22.4846
TraesCS3B02G144100.1	TRIDC3BG020230.1	T. dicoccoides	0.0087	205.8	1210.2	0.1638	0.0017	0.0101	0.776923
TraesCS3B02G153700.1	TRIDC3BG021750.1	T. dicoccoides	0.0158	601.4	2101.6	1.1798	0.0054	0.0046	0.353846
TraesCS3B02G158800.1	TRIDC3BG022560.1	T. dicoccoides	0.0164	113	649	0.1697	0.0032	0.0186	1.43077
TraesCS3B02G159100.1	TRIDC3BG022580.13	T. dicoccoides	0.0037	639.6	1880.4	0.1644	0.0005	0.0033	0.253846
TraesCS3B02G164500.1	TRIDC3BG023500.3	T. dicoccoides	0.0045	252.1	1097.9	0.2243	0.0009	0.0041	0.315385
TraesCS3B02G167500.1	TRIDC2BG021190.1	T. dicoccoides	0.2787	124.3	748.7	0.208	0.0602	0.2897	22.2846
TraesCS3B02G184200.1	TRIDC2BG021720.4	T. dicoccoides	0.3452	375.3	1049.7	0.6516	0.1009	0.1548	11.9077
TraesCS3B02G185400.1	TRIDC3BG026280.1	T. dicoccoides	0.0295	436.6	1438.4	0.4576	0.0077	0.0168	1.29231
TraesCS3B02G190300.1	TRIDC3BG026110.7	T. dicoccoides	0.0179	801.6	1943.4	0.3102	0.0036	0.0117	0.9
TraesCS3B02G194000.1	TRIDC3BG026490.1	T. dicoccoides	0.0198	66.7	557.3	0.001	0.0001	0.0614	4.72308
TraesCS3B02G198700.1	TRIDC3BG027100.2	T. dicoccoides	0.0815	214.1	622.9	0.894	0.0264	0.0295	2.26923
TraesCS3B02G199000.1	TRIDC3BG027140.1	T. dicoccoides	0.0071	269	1459	0.0596	0.0007	0.0115	0.884615
TraesCS3B02G208300.1	TRIDC3BG028580.1	T. dicoccoides	0.0089	365.6	996.4	1.0778	0.003	0.0028	0.215385
TraesCS3B02G210300.1	TRIDC3BG028780.1	T. dicoccoides	0.0038	436.1	1180.9	0.3402	0.0008	0.0025	0.192308
TraesCS3B02G217100.1	TRIDC3BG029830.3	T. dicoccoides	0.0443	94.5	757.5	0.1652	0.0095	0.0573	4.40769
TraesCS3B02G233700.1	TRIDC3BG034910.1	T. dicoccoides	0.0071	282.9	998.1	0.1414	0.001	0.0072	0.553846
TraesCS3B02G251700.1	TRIDC3BG037700.2	T. dicoccoides	0.004	509.2	999.8	0.4993	0.001	0.002	0.153846
TraesCS3B02G255600.1	TRIDC3BG062710.1	T. dicoccoides	0.3149	168.9	767.1	0.3036	0.0742	0.2445	18.8077
TraesCS3B02G258400.1	TRIDC3BG038690.3	T. dicoccoides	0.0085	94.9	586.1	0.1811	0.0017	0.0096	0.738462
TraesCS3B02G258800.1	TRIDC3BG038730.1	T. dicoccoides	0.0143	107.3	531.7	0.3966	0.0038	0.0096	0.738462
TraesCS3B02G262400.1	TRIDC3BG039300.2	T. dicoccoides	0.0062	243.7	1259.3	0.0945	0.0008	0.0085	0.653846
TraesCS3B02G269100.1	TRIDC3BG040350.2	T. dicoccoides	0.0267	28.2	238.8	0.001	0.0001	0.0835	6.42308
TraesCS3B02G270500.1	TRIDC3BG040640.2	T. dicoccoides	0.014	163	938	0.2467	0.0032	0.013	1
TraesCS3B02G273600.1	TRIDC3BG041020.3	T. dicoccoides	0.0731	187.4	826.6	0.3153	0.0174	0.0552	4.24615
TraesCS3B02G273900.1	TRIDC3BG041070.1	T. dicoccoides	0.0028	1639.8	3859.2	1.6914	0.001	0.0006	0.0461538
TraesCS3B02G278000.1	TRIDC3BG041700.2	T. dicoccoides	0.0082	187.8	562.2	0.3161	0.0018	0.0056	0.430769
TraesCS3B02G280700.1	TRIDC3BG042020.2	T. dicoccoides	0.0468	159.2	698.8	0.9372	0.0154	0.0164	1.26154
TraesCS3B02G281500.1	TRIDC3BG042130.4	T. dicoccoides	0.0196	198.8	584.2	0.4843	0.0051	0.0106	0.815385
TraesCS3B02G288700.1	TRIDC3BG042620.1	T. dicoccoides	0.1476	176.9	1152.1	0.1775	0.0304	0.1715	13.1923
TraesCS3B02G290600.1	TRIDC3BG043590.2	T. dicoccoides	0.0083	144.8	590.2	0.2441	0.0017	0.007	0.538462
TraesCS3B02G298200.1	TRIDC3BG044630.3	T. dicoccoides	0.138	82.7	595.3	0.0492	0.0137	0.2784	21.4154
TraesCS3B02G307000.1	TRIDC3BG045780.7	T. dicoccoides	0.0073	613.1	1885.9	0.1585	0.0011	0.0067	0.515385
TraesCS3B02G308500.1	TRIDC3BG046050.1	T. dicoccoides	0.0129	141.5	1022.5	0.2108	0.003	0.0141	1.08462
TraesCS3B02G314600.1	TRIDC3BG046930.2	T. dicoccoides	0.1231	106	575	0.1939	0.0249	0.1285	9.88462
TraesCS3B02G315600.1	TRIDC3BG047090.2	T. dicoccoides	0.0137	148.3	742.7	0.5758	0.0041	0.0071	0.546154
TraesCS3B02G326000.1	TRIDC3BG048990.1	T. dicoccoides	0.0296	89.1	426.9	0.3248	0.0073	0.0223	1.71538
TraesCS3B02G326500.1	TRIDC3BG049040.8	T. dicoccoides	0.0186	243.1	899.9	1.5258	0.0067	0.0044	0.338462
TraesCS3B02G327000.1	TRIDC3BG049090.7	T. dicoccoides	0.0109	525.4	1454.6	0.2615	0.0021	0.0079	0.607692
TraesCS3B02G328400.1	TRIDC3BG049360.2	T. dicoccoides	0.0229	117.3	686.7	0.3213	0.0058	0.0181	1.39231
TraesCS3B02G333400.1	TRIDC3BG050220.3	T. dicoccoides	0.0181	136.9	703.1	0.7432	0.0057	0.0077	0.592308
TraesCS3B02G354900.1	TRIDC3BG053080.2	T. dicoccoides	0.0182	546.8	1502.2	0.1746	0.0027	0.0153	1.17692
TraesCS3B02G365100.1	TRIDC3BG054200.3	T. dicoccoides	0.012	316.1	991.9	0.1961	0.002	0.0102	0.784615
TraesCS3B02G367500.1	TRIDC3BG054490.1	T. dicoccoides	0.0508	429.7	1274.3	0.484	0.0133	0.0276	2.12308
TraesCS3B02G375300.1	TRIDC3BG055770.1	T. dicoccoides	0.0075	253.2	541.8	0.4732	0.0019	0.0039	0.3
TraesCS3B02G375700.1	TRIDC3BG055830.1	T. dicoccoides	0.3289	161.1	645.9	0.2323	0.066	0.2843	21.8692
TraesCS3B02G378100.1	TRIDC3BG056180.2	T. dicoccoides	0.0697	127.3	625.7	0.7421	0.022	0.0296	2.27692
TraesCS3B02G379200.1	TRIDC3BG056310.1	T. dicoccoides	0.0676	197.7	1479.3	0.0718	0.0089	0.1244	9.56923
TraesCS3B02G383000.1	TRIDC3BG056830.1	T. dicoccoides	0.1024	124.9	511.1	0.1465	0.0159	0.1087	8.36154
TraesCS3B02G392600.1	TRIDC3BG058440.1	T. dicoccoides	0.0065	538	1871	0.178	0.0011	0.006	0.461538
TraesCS3B02G396100.1	TRIDC3BG058870.5	T. dicoccoides	0.0116	197.9	1662.1	0.1511	0.0024	0.0161	1.23846
TraesCS3B02G400200.1	TRIDC3BG059570.1	T. dicoccoides	0.0145	251.9	1008.1	0.4989	0.004	0.0081	0.623077
TraesCS3B02G400500.1	TRIDC3BG059570.1	T. dicoccoides	0.2571	246.8	971.2	0.3696	0.0637	0.1723	13.2538
TraesCS3B02G409600.1	TRIDC3BG060730.2	T. dicoccoides	0.0091	161.6	831.4	0.3965	0.0024	0.0061	0.469231
TraesCS3B02G424500.1	TRIDC3BG062600.2	T. dicoccoides	0.0576	283.4	1267.6	0.0833	0.0064	0.0766	5.89231
TraesCS3B02G436900.1	TRIDC3BG064440.1	T. dicoccoides	0.0123	161.9	837.1	0.0632	0.0012	0.0191	1.46923
TraesCS3B02G438900.1	TRIDC3BG064730.1	T. dicoccoides	0.007	294.9	1004.1	0.5604	0.002	0.0035	0.269231
TraesCS3B02G441600.1	TRIDC3BG065130.3	T. dicoccoides	0.1076	521.8	1134.2	0.1193	0.0108	0.0904	6.95385
TraesCS3B02G447100.1	TRIDC3BG065650.3	T. dicoccoides	0.01	939.1	2384.9	1.0223	0.0034	0.0033	0.253846
TraesCS3B02G457400.1	TRIDC3BG067620.5	T. dicoccoides	0.0043	163.5	1258.5	0.1241	0.0008	0.0064	0.492308
TraesCS3B02G469100.1	TRIDC3BG069110.3	T. dicoccoides	0.0086	575.8	1599.2	0.1709	0.0013	0.0073	0.561538
TraesCS3B02G470700.1	TRIDC3BG069340.1	T. dicoccoides	0.0159	139.5	832.5	0.2706	0.0038	0.0142	1.09231
TraesCS3B02G486000.1	TRIDC3BG071360.1	T. dicoccoides	0.0078	733.9	1645.1	0.2134	0.0012	0.0057	0.438462
TraesCS3B02G493200.1	TRIDC3BG072450.5	T. dicoccoides	0.0185	1117	2549	0.5833	0.0051	0.0087	0.669231
TraesCS3B02G504900.1	TRIDC3BG073970.1	T. dicoccoides	0.013	164.7	297.3	0.5794	0.0034	0.0059	0.453846
TraesCS3B02G517000.1	TRIDC3BG075550.1	T. dicoccoides	0.0172	389.4	861.6	0.5697	0.0046	0.0081	0.623077
TraesCS3B02G530100.1	TRIDC3BG077140.3	T. dicoccoides	0.0531	374.5	1308.5	0.5025	0.0145	0.0289	2.22308
TraesCS3B02G530300.1	TRIDC3BG077150.1	T. dicoccoides	0.0172	425.5	816.5	1.2815	0.0062	0.0048	0.369231
TraesCS3B02G533100.1	TRIDC3BG077450.1	T. dicoccoides	0.2496	65	499	0.4854	0.0741	0.1527	11.7462
TraesCS3B02G534500.1	TRIDC3BG077450.1	T. dicoccoides	0.2361	51.1	446.9	0.5203	0.0719	0.1382	10.6308
TraesCS3B02G535100.1	TRIDC3BG077630.3	T. dicoccoides	0.0045	109.6	1249.4	0.0833	0.0008	0.0096	0.738462
TraesCS3B02G550000.1	TRIDC3BG079320.1	T. dicoccoides	0.0121	152.2	582.8	0.1358	0.0017	0.0129	0.992308
TraesCS3B02G552400.1	TRIDC3BG079920.1	T. dicoccoides	0.0171	91.1	832.9	0.001	0.0001	0.0573	4.40769
TraesCS3B02G568200.1	TRIDC3BG082140.1	T. dicoccoides	0.0451	83.9	603.1	0.3134	0.0119	0.0378	2.90769
TraesCS3B02G568300.1	TRIDC3BG082160.1	T. dicoccoides	0.0145	97	725	0.1374	0.0028	0.0203	1.56154
TraesCS3B02G600800.1	TRIDC3BG086490.1	T. dicoccoides	0.0227	633.3	1919.7	0.5744	0.0064	0.0111	0.853846
TraesCS3B02G608600.1	TRIDC3BG087210.1	T. dicoccoides	0.072	46.6	496.4	0.0289	0.0062	0.2141	16.4692
TraesCS3B02G608800.1	TRIDC3BG086720.3	T. dicoccoides	0.0678	136.8	691.2	0.0966	0.0089	0.092	7.07692
TraesCS3B02G610700.1	TRIDC3BG086970.1	T. dicoccoides	0.1299	82	356	2.2365	0.0483	0.0216	1.66154
TraesCS3D02G004300.1	EMT02714	Ae. tauschii	0.03	121.6	607.4	0.1466	0.0051	0.0346	2.66154
TraesCS3D02G008900.1	EMT05070	Ae. tauschii	0.2984	84.1	506.9	0.5173	0.0878	0.1697	13.0538
TraesCS3D02G009400.1	EMT33310	Ae. tauschii	0.0097	153.6	476.4	0.3116	0.0021	0.0068	0.523077
TraesCS3D02G009500.1	EMT33309	Ae. tauschii	0.054	169.8	460.2	0.3134	0.0113	0.0361	2.77692
TraesCS3D02G014800.1	EMT33189	Ae. tauschii	0.0374	155.2	669.8	0.3368	0.0091	0.027	2.07692
TraesCS3D02G014900.1	EMT33188	Ae. tauschii	0.083	196.4	742.6	0.6026	0.0243	0.0404	3.10769
TraesCS3D02G017700.1	EMT13581	Ae. tauschii	0.2378	124.1	670.9	0.3124	0.059	0.1888	14.5231
TraesCS3D02G029100.1	EMT26167	Ae. tauschii	0.0417	708.7	2090.3	0.8247	0.0132	0.016	1.23077
TraesCS3D02G052400.1	EMT31332	Ae. tauschii	0.0153	170.7	828.3	0.1368	0.0024	0.0179	1.37692
TraesCS3D02G054300.1	EMT18191	Ae. tauschii	0.342	136	671	0.4842	0.0967	0.1996	15.3538
TraesCS3D02G067700.1	EMT16258	Ae. tauschii	0.0115	558.8	1562.2	0.5776	0.0032	0.0056	0.430769
TraesCS3D02G067800.1	EMT16259	Ae. tauschii	0.0046	518.2	1464.8	0.1718	0.0007	0.004	0.307692
TraesCS3D02G067900.1	EMT16258	Ae. tauschii	0.4683	532.5	1531.5	0.5024	0.1243	0.2475	19.0385
TraesCS3D02G073300.1	EMT10168	Ae. tauschii	0.0674	145.3	637.7	0.3264	0.0162	0.0498	3.83077
TraesCS3D02G102500.1	EMT12058	Ae. tauschii	0.1541	111.9	482.1	0.9271	0.0506	0.0546	4.2
TraesCS3D02G106600.1	EMT03037	Ae. tauschii	0.1832	187.6	1015.4	0.5345	0.0538	0.1006	7.73846
TraesCS3D02G109100.1	EMT19857	Ae. tauschii	0.3887	107.5	525.5	0.3867	0.1021	0.2639	20.3
TraesCS3D02G109400.1	EMT27068	Ae. tauschii	0.1336	246.8	1031.2	0.4195	0.0351	0.0837	6.43846
TraesCS3D02G113300.1	EMT14404	Ae. tauschii	0.0468	223.7	1252.3	0.0788	0.0056	0.0715	5.5
TraesCS3D02G114500.1	EMT06503	Ae. tauschii	0.0189	222.4	434.6	0.5096	0.0047	0.0093	0.715385
TraesCS3D02G118300.1	EMT16151	Ae. tauschii	0.2532	153.9	1166.1	0.2656	0.0638	0.2403	18.4846
TraesCS3D02G118400.1	EMT16151	Ae. tauschii	0.0125	193.4	1261.6	0.7477	0.004	0.0053	0.407692
TraesCS3D02G121300.1	EMT23464	Ae. tauschii	0.2571	163.8	460.2	0.7348	0.0783	0.1066	8.2
TraesCS3D02G121400.1	EMT23464	Ae. tauschii	0.3333	164.3	477.7	0.619	0.096	0.1551	11.9308
TraesCS3D02G125300.1	EMT03587	Ae. tauschii	0.4338	205.2	1000.8	0.5446	0.1266	0.2325	17.8846
TraesCS3D02G134000.1	EMT26451	Ae. tauschii	0.1712	156.2	674.8	0.359	0.0427	0.119	9.15385
TraesCS3D02G136400.1	EMT04827	Ae. tauschii	0.1226	470.1	1440.9	0.7311	0.0375	0.0513	3.94615
TraesCS3D02G136500.1	EMT04827	Ae. tauschii	0.3129	463.3	1282.7	0.5733	0.0871	0.1519	11.6846
TraesCS3D02G136600.1	EMT04829	Ae. tauschii	0.0499	607.7	1786.3	0.9734	0.0165	0.017	1.30769
TraesCS3D02G139300.1	EMT21245	Ae. tauschii	0.0656	227.2	777.8	0.226	0.0123	0.0545	4.19231
TraesCS3D02G140500.1	EMT28518	Ae. tauschii	0.0283	173.2	495.8	0.1595	0.004	0.025	1.92308
TraesCS3D02G141500.1	EMT22881	Ae. tauschii	0.1231	598.2	1819.8	0.7112	0.0373	0.0524	4.03077
TraesCS3D02G146900.1	EMT23019	Ae. tauschii	0.3005	201	912	0.3524	0.0752	0.2135	16.4231
TraesCS3D02G161100.1	EMT17114	Ae. tauschii	0.0777	677.9	2097.1	1.1109	0.0266	0.0239	1.83846
TraesCS3D02G165100.1	EMT26046	Ae. tauschii	0.0413	313.2	1261.8	0.4975	0.0115	0.023	1.76923
TraesCS3D02G166700.1	EMT31591	Ae. tauschii	0.066	528.7	1571.3	1.0956	0.0225	0.0205	1.57692
TraesCS3D02G166900.1	EMT25190	Ae. tauschii	0.0022	960.4	1838.6	0.5239	0.0006	0.0011	0.0846154
TraesCS3D02G170000.1	EMT29965	Ae. tauschii	0.0432	127.6	796.4	0.4956	0.0126	0.0255	1.96154
TraesCS3D02G173300.1	EMT28664	Ae. tauschii	0.0063	233.1	1257.9	0.0876	0.0008	0.0091	0.7
TraesCS3D02G185500.1	EMT08945	Ae. tauschii	0.0875	377.4	1137.6	1.0667	0.0296	0.0278	2.13846
TraesCS3D02G191400.1	EMT14357	Ae. tauschii	0.032	92.7	576.3	1.6211	0.0113	0.0069	0.530769
TraesCS3D02G209700.1	EMT28341	Ae. tauschii	0.0029	724.9	1324.1	0.5501	0.0008	0.0014	0.107692
TraesCS3D02G223700.1	EMT27664	Ae. tauschii	0.2453	93.7	548.3	0.3125	0.0619	0.1981	15.2385
TraesCS3D02G227400.1	EMT21991	Ae. tauschii	0.1645	83.4	417.6	0.8998	0.0538	0.0598	4.6
TraesCS3D02G233200.1	EMT31884	Ae. tauschii	0.1487	148.6	574.4	0.6499	0.0446	0.0687	5.28462
TraesCS3D02G238300.1	EMT08686	Ae. tauschii	0.0176	147.2	725.8	0.3025	0.0042	0.014	1.07692
TraesCS3D02G242500.1	EMT25430	Ae. tauschii	0.0626	75.2	473.8	0.3537	0.0167	0.0472	3.63077
TraesCS3D02G245400.1	EMT25952	Ae. tauschii	0.2774	261	810	0.9942	0.0924	0.0929	7.14615
TraesCS3D02G251600.1	EMT05550	Ae. tauschii	0.0811	107.3	504.7	0.3668	0.0208	0.0566	4.35385
TraesCS3D02G252400.1	EMT33131	Ae. tauschii	0.6263	161.6	552.4	1.0093	0.2092	0.2073	15.9462
TraesCS3D02G272700.1	EMT15631	Ae. tauschii	0.0317	490.4	1942.6	0.5507	0.0091	0.0165	1.26923
TraesCS3D02G280200.1	EMT27386	Ae. tauschii	0.1463	36.3	269.7	0.2283	0.0348	0.1525	11.7308
TraesCS3D02G284200.1	EMT11439	Ae. tauschii	0.0366	70.7	517.3	0.797	0.0118	0.0148	1.13846
TraesCS3D02G292100.1	EMT18418	Ae. tauschii	0.3088	505.8	1534.2	0.9077	0.1004	0.1106	8.50769
TraesCS3D02G298900.1	EMT23605	Ae. tauschii	0.1152	96.9	584.1	0.4038	0.0317	0.0786	6.04615
TraesCS3D02G324200.1	EMT18405	Ae. tauschii	0.4012	130.7	454.3	0.458	0.1058	0.2309	17.7615
TraesCS3D02G330300.1	EMT09034	Ae. tauschii	0.1749	220.9	775.1	0.7057	0.0534	0.0756	5.81538
TraesCS3D02G333100.1	EMT31805	Ae. tauschii	0.0631	103.1	796.9	0.2394	0.0154	0.0644	4.95385
TraesCS3D02G335500.1	EMT31234	Ae. tauschii	0.1237	146.5	633.5	1.2296	0.0427	0.0347	2.66923
TraesCS3D02G337100.1	EMT33502	Ae. tauschii	0.3775	180.9	587.1	0.8767	0.1218	0.1389	10.6846
TraesCS3D02G337400.1	EMT15410	Ae. tauschii	0.515	127.8	664.2	0.7017	0.1606	0.229	17.6154
TraesCS3D02G340000.1	EMT24601	Ae. tauschii	0.1806	74.5	444.5	0.3608	0.048	0.133	10.2308
TraesCS3D02G352500.1	EMT14634	Ae. tauschii	0.413	189	657	0.3566	0.0981	0.2752	21.1692
TraesCS3D02G352600.1	EMT14634	Ae. tauschii	0.0143	171.9	683.1	0.7203	0.0044	0.0061	0.469231
TraesCS3D02G353500.1	EMT03011	Ae. tauschii	0.1292	382.9	1309.1	0.9265	0.0423	0.0457	3.51538
TraesCS3D02G355500.1	EMT17282	Ae. tauschii	0.2598	46.3	262.7	0.1975	0.0538	0.2724	20.9538
TraesCS3D02G357400.1	EMT12590	Ae. tauschii	0.0172	180.6	1592.4	0.9679	0.0057	0.0059	0.453846
TraesCS3D02G361600.1	EMT27928	Ae. tauschii	0.3379	242.1	951.9	0.3585	0.0826	0.2305	17.7308
TraesCS3D02G361700.1	EMT27928	Ae. tauschii	0.1969	263.4	978.6	0.4059	0.0501	0.1234	9.49231
TraesCS3D02G364900.1	EMT21515	Ae. tauschii	0.3329	254.4	915.6	0.2981	0.0734	0.2461	18.9308
TraesCS3D02G365000.1	EMT21515	Ae. tauschii	0.0179	266.9	921.1	1.6676	0.0065	0.0039	0.3
TraesCS3D02G365500.1	EMT09757	Ae. tauschii	0.0053	240.6	908.4	0.2516	0.0011	0.0044	0.338462
TraesCS3D02G384400.1	EMT02831	Ae. tauschii	0.1045	359.6	1311.4	0.6435	0.0311	0.0484	3.72308
TraesCS3D02G385500.1	EMT01361	Ae. tauschii	0.3262	254.6	1206.4	0.3829	0.0849	0.2217	17.0538
TraesCS3D02G385900.1	EMT29543	Ae. tauschii	0.2344	164.4	684.6	0.4011	0.0606	0.1511	11.6231
TraesCS3D02G386000.1	EMT29543	Ae. tauschii	0.014	163.8	709.2	0.6282	0.0042	0.0067	0.515385
TraesCS3D02G388700.1	EMT27513	Ae. tauschii	0.2355	56.6	381.4	0.831	0.0765	0.0921	7.08462
TraesCS3D02G389100.1	EMT08990	Ae. tauschii	0.0043	425.9	1671.1	0.5104	0.0012	0.0024	0.184615
TraesCS3D02G400500.1	EMT23566	Ae. tauschii	0.0149	85	731	0.3528	0.0042	0.0118	0.907692
TraesCS3D02G407400.1	EMT19288	Ae. tauschii	0.0467	779.8	2496.2	0.9649	0.0154	0.016	1.23077
TraesCS3D02G408600.1	EMT24643	Ae. tauschii	0.0338	396.7	1502.3	0.6413	0.0101	0.0157	1.20769
TraesCS3D02G412800.1	EMT07173	Ae. tauschii	0.2971	134.1	555.9	0.4352	0.0791	0.1817	13.9769
TraesCS3D02G433200.1	EMT03543	Ae. tauschii	0.016	185.1	579.9	0.9196	0.0052	0.0057	0.438462
TraesCS3D02G434700.1	EMT09779	Ae. tauschii	0.0441	618.8	1769.2	0.565	0.0122	0.0217	1.66923
TraesCS3D02G435200.1	EMT26157	Ae. tauschii	0.0244	177.4	698.6	0.6393	0.0073	0.0114	0.876923
TraesCS3D02G442000.1	EMT17168	Ae. tauschii	0.1077	647.4	1872.6	0.7642	0.0333	0.0435	3.34615
TraesCS3D02G467000.1	EMT10359	Ae. tauschii	0.0921	306.7	941.3	0.7371	0.0282	0.0383	2.94615
TraesCS3D02G478100.1	EMT32039	Ae. tauschii	0.1038	339.1	1091.9	0.2912	0.0219	0.0753	5.79231
TraesCS3D02G478600.1	EMT11663	Ae. tauschii	0.0057	537	1056	1.0161	0.0019	0.0019	0.146154
TraesCS3D02G495300.1	EMT11154	Ae. tauschii	0.0264	111.4	581.6	0.9079	0.0086	0.0095	0.730769
TraesCS3D02G497300.1	EMT11284	Ae. tauschii	0.0081	70.9	664.1	0.1125	0.0015	0.0136	1.04615
TraesCS3D02G537500.1	EMT09741	Ae. tauschii	0.0352	251.5	873.5	0.64	0.0104	0.0163	1.25385
TraesCS3D02G539200.1	EMT09213	Ae. tauschii	0.0176	150.7	545.3	0.8561	0.0057	0.0066	0.507692
TraesCS3D02G540700.1	EMT32481	Ae. tauschii	0.0162	92.6	675.4	0.1314	0.003	0.0228	1.75385
TraesCS3D02G544000.1	EMT24406	Ae. tauschii	0.2395	27.8	122.2	0.5504	0.0693	0.126	9.69231
TraesCS4A02G001300.1	TRIUR316508-P1	T. urartu	0.0182	180.7	821.3	1.057	0.0061	0.0058	0.446154
TraesCS4A02G008900.1	TRIUR332694-P1	T. urartu	0.0063	489.8	962.2	0.2488	0.001	0.0042	0.323077
TraesCS4A02G016600.1	TRIUR312807-P1	T. urartu	0.1185	98.2	795.8	0.2395	0.0293	0.1223	9.40769
TraesCS4A02G017700.1	TRIUR308744-P1	T. urartu	0.0126	190	782	0.2327	0.0026	0.011	0.846154
TraesCS4A02G022700.1	TRIUR316398-P1	T. urartu	0.0156	136.2	1447.8	0.0894	0.0028	0.0311	2.39231
TraesCS4A02G028100.1	TRIUR330491-P1	T. urartu	0.2324	161.4	561.6	0.5064	0.0636	0.1256	9.66154
TraesCS4A02G028200.1	TRIUR330491-P1	T. urartu	0.2991	151.6	538.4	0.5124	0.0825	0.1609	12.3769
TraesCS4A02G037300.1	TRIUR309891-P1	T. urartu	0.0232	77.1	315.9	0.4893	0.0064	0.0131	1.00769
TraesCS4A02G039000.1	TRIUR330897-P1	T. urartu	0.0126	389.6	1077.4	0.3432	0.0028	0.0081	0.623077
TraesCS4A02G040600.1	TRIUR307163-P1	T. urartu	0.013	75.2	617.8	0.062	0.0016	0.0265	2.03846
TraesCS4A02G047700.1	TRIUR301454-P1	T. urartu	0.0173	89.3	624.7	0.1375	0.0032	0.0235	1.80769
TraesCS4A02G053000.1	TRIUR307102-P1	T. urartu	0.0777	218.8	897.2	0.6433	0.0234	0.0363	2.79231
TraesCS4A02G058800.1	TRIUR331693-P1	T. urartu	0.2886	141.7	443.3	0.8577	0.0925	0.1078	8.29231
TraesCS4A02G058900.1	TRIUR330491-P1	T. urartu	0.4145	100.8	403.2	0.334	0.0988	0.2957	22.7462
TraesCS4A02G060400.1	TRIUR328150-P1	T. urartu	0.0233	379.6	1480.4	0.2454	0.0048	0.0195	1.5
TraesCS4A02G063100.1	TRIUR325342-P1	T. urartu	0.0049	387	1617	0.1039	0.0006	0.0059	0.453846
TraesCS4A02G064100.1	TRIUR320025-P1	T. urartu	0.2498	76.4	391.6	0.5022	0.0717	0.1427	10.9769
TraesCS4A02G066000.1	TRIUR320025-P1	T. urartu	0.2798	44.7	240.3	0.223	0.0603	0.2705	20.8077
TraesCS4A02G072000.1	TRIUR328826-P1	T. urartu	0.0752	209.4	459.6	0.5587	0.0201	0.036	2.76923
TraesCS4A02G073000.1	TRIUR315554-P1	T. urartu	0.0575	234.7	674.3	1.1411	0.0198	0.0174	1.33846
TraesCS4A02G081000.1	TRIUR309240-P1	T. urartu	0.0313	120.2	473.8	0.1234	0.0043	0.0347	2.66923
TraesCS4A02G082400.1	TRIUR318095-P1	T. urartu	0.4193	171.6	800.4	0.3709	0.1076	0.29	22.3077
TraesCS4A02G087000.1	TRIUR331897-P1	T. urartu	0.2307	139	830	0.3464	0.0605	0.1747	13.4385
TraesCS4A02G088500.1	TRIUR313261-P1	T. urartu	0.0055	233.2	1449.8	0.0768	0.0007	0.009	0.692308
TraesCS4A02G101100.1	TRIUR326222-P1	T. urartu	0.02	82.3	376.7	0.4223	0.0054	0.0127	0.976923
TraesCS4A02G107300.1	TRIUR327720-P1	T. urartu	0.0334	84.7	461.3	0.9544	0.0111	0.0116	0.892308
TraesCS4A02G117400.1	TRIUR323238-P1	T. urartu	0.0136	148.9	739.1	0.5892	0.004	0.0069	0.530769
TraesCS4A02G123800.1	TRIUR332369-P1	T. urartu	0.0081	265.8	853.2	0.1586	0.0012	0.0075	0.576923
TraesCS4A02G126300.1	TRIUR316094-P1	T. urartu	0.0957	215.9	666.1	0.5378	0.0263	0.049	3.76923
TraesCS4A02G128100.1	TRIUR306231-P1	T. urartu	0.0101	111	507	0.1995	0.002	0.0098	0.753846
TraesCS4A02G128900.1	TRIUR315490-P1	T. urartu	0.2328	22.5	187.5	0.6721	0.0737	0.1097	8.43846
TraesCS4A02G129400.1	TRIUR326675-P1	T. urartu	0.0704	187.6	1327.4	0.342	0.019	0.0554	4.26154
TraesCS4A02G130000.1	TRIUR319658-P1	T. urartu	0.1393	221.9	840.1	0.7842	0.0439	0.056	4.30769
TraesCS4A02G130200.1	TRIUR334808-P1	T. urartu	0.03	191.9	729.1	0.5128	0.0084	0.0163	1.25385
TraesCS4A02G130600.1	TRIUR335152-P1	T. urartu	0.1445	141.5	884.5	0.1845	0.0299	0.1622	12.4769
TraesCS4A02G131000.1	TRIUR329857-P1	T. urartu	0.2067	159.9	899.1	0.5106	0.0602	0.1179	9.06923
TraesCS4A02G138100.1	TRIUR332773-P1	T. urartu	0.0059	218.9	816.1	0.2611	0.0012	0.0047	0.361538
TraesCS4A02G151500.1	TRIUR334926-P1	T. urartu	0.0118	254.6	510.4	1.0155	0.004	0.0039	0.3
TraesCS4A02G169000.1	TRIUR333223-P1	T. urartu	0.1146	229.5	862.5	0.8016	0.0363	0.0453	3.48462
TraesCS4A02G173300.1	TRIUR316687-P1	T. urartu	0.1213	133.9	487.1	0.6999	0.037	0.0529	4.06923
TraesCS4A02G176200.1	TRIUR321532-P1	T. urartu	0.0478	471.4	1931.6	0.472	0.0131	0.0277	2.13077
TraesCS4A02G176300.1	TRIUR321533-P1	T. urartu	0.0075	405.2	1619.8	1.0028	0.0025	0.0025	0.192308
TraesCS4A02G176400.1	TRIUR308696-P1	T. urartu	0.0805	318.3	1175.7	0.9283	0.0264	0.0284	2.18462
TraesCS4A02G176500.1	TRIUR308697-P1	T. urartu	0.0082	375.2	1109.8	0.336	0.0018	0.0054	0.415385
TraesCS4A02G176700.1	TRIUR308699-P1	T. urartu	0.1726	333.6	1496.4	0.555	0.0502	0.0904	6.95385
TraesCS4A02G177100.1	TRIUR311046-P1	T. urartu	0.008	458.9	1446.1	0.4609	0.0021	0.0045	0.346154
TraesCS4A02G181300.1	TRIUR316471-P1	T. urartu	0.0064	162.1	794.9	0.1987	0.0013	0.0064	0.492308
TraesCS4A02G185900.1	TRIUR323300-P1	T. urartu	0.0098	335.6	924.4	0.3501	0.0022	0.0062	0.476923
TraesCS4A02G189700.1	TRIUR320609-P1	T. urartu	0.0135	106	803	0.3743	0.0038	0.01	0.769231
TraesCS4A02G191300.1	TRIUR327771-P1	T. urartu	0.0139	148.3	730.7	0.1967	0.0027	0.014	1.07692
TraesCS4A02G207500.1	TRIUR333494-P1	T. urartu	0.0046	265.8	1036.2	0.2678	0.001	0.0037	0.284615
TraesCS4A02G209100.1	TRIUR328119-P1	T. urartu	0.0138	202.4	1114.6	0.7767	0.0044	0.0057	0.438462
TraesCS4A02G209800.1	TRIUR312876-P1	T. urartu	0.0356	346.6	1012.4	2.6799	0.0141	0.0053	0.407692
TraesCS4A02G211100.1	TRIUR335269-P1	T. urartu	0.0221	170.3	657.7	0.1288	0.0031	0.0239	1.83846
TraesCS4A02G219700.1	TRIUR312483-P1	T. urartu	0.0585	36.7	440.3	0.1609	0.0139	0.0864	6.64615
TraesCS4A02G221100.1	TRIUR328905-P1	T. urartu	0.2531	72.5	362.5	0.7646	0.0803	0.105	8.07692
TraesCS4A02G222500.1	TRIUR306365-P1	T. urartu	0.0154	171.2	818.8	0.8089	0.0049	0.0061	0.469231
TraesCS4A02G225600.1	TRIUR332260-P1	T. urartu	0.0189	332.9	1317.1	0.2887	0.0042	0.0145	1.11538
TraesCS4A02G230700.1	TRIUR322305-P1	T. urartu	0.0863	595	2048	0.4906	0.0233	0.0475	3.65385
TraesCS4A02G233700.1	TRIUR325737-P1	T. urartu	0.3401	141.7	413.3	0.3715	0.0792	0.2131	16.3923
TraesCS4A02G233800.1	TRIUR309120-P1	T. urartu	0.0653	430.4	1126.6	0.8541	0.0208	0.0243	1.86923
TraesCS4A02G233900.1	TRIUR315106-P1	T. urartu	0.145	332.1	1227.9	0.6961	0.0442	0.0635	4.88462
TraesCS4A02G241300.1	TRIUR325737-P1	T. urartu	0.0152	225.1	785.9	0.4067	0.0038	0.0094	0.723077
TraesCS4A02G241500.1	TRIUR326567-P1	T. urartu	0.0274	317.1	1128.9	0.8869	0.0089	0.01	0.769231
TraesCS4A02G242300.1	TRIUR332260-P1	T. urartu	0.2062	418	1235	0.5683	0.0577	0.1015	7.80769
TraesCS4A02G242400.1	TRIUR318663-P1	T. urartu	0.3835	198.2	758.8	0.525	0.1077	0.2051	15.7769
TraesCS4A02G242700.1	TRIUR327612-P1	T. urartu	0.1003	71.4	540.6	0.2596	0.0251	0.0967	7.43846
TraesCS4A02G249400.1	TRIUR323258-P1	T. urartu	0.3665	178.9	544.1	0.8152	0.1157	0.1419	10.9154
TraesCS4A02G255800.1	TRIUR301282-P1	T. urartu	0.039	292.3	655.7	1.2808	0.0139	0.0109	0.838462
TraesCS4A02G256700.1	TRIUR330534-P1	T. urartu	0.0546	101.4	693.6	0.3588	0.0148	0.0413	3.17692
TraesCS4A02G257900.1	TRIUR326880-P1	T. urartu	0.0203	36.7	461.3	0.0334	0.0022	0.0649	4.99231
TraesCS4A02G263300.1	TRIUR316046-P1	T. urartu	0.0899	314.4	969.6	0.4316	0.0227	0.0525	4.03846
TraesCS4A02G271000.1	TRIUR318790-P1	T. urartu	0.4094	167.3	1053.7	0.3924	0.1126	0.2869	22.0692
TraesCS4A02G271300.1	TRIUR331795-P1	T. urartu	0.029	214.3	841.7	0.3742	0.0072	0.0193	1.48462
TraesCS4A02G276700.1	TRIUR307445-P1	T. urartu	0.0052	593.8	1152.2	0.254	0.0009	0.0034	0.261538
TraesCS4A02G277300.1	TRIUR309920-P1	T. urartu	0.0486	144.9	548.1	0.2808	0.0106	0.0376	2.89231
TraesCS4A02G280200.1	TRIUR320025-P1	T. urartu	0.1981	40.6	244.4	0.2207	0.0439	0.199	15.3077
TraesCS4A02G283000.1	TRIUR305747-P1	T. urartu	0.0952	381.3	1289.7	0.7258	0.0292	0.0403	3.1
TraesCS4A02G284600.1	TRIUR311462-P1	T. urartu	0.0554	516.1	1844.9	0.3996	0.0139	0.0348	2.67692
TraesCS4A02G285900.1	TRIUR315386-P1	T. urartu	0.0124	133.1	364.9	0.3403	0.0027	0.008	0.615385
TraesCS4A02G289400.1	TRIUR328848-P1	T. urartu	0.1199	408.9	1451.1	0.5954	0.0348	0.0584	4.49231
TraesCS4A02G291500.1	TRIUR334986-P1	T. urartu	0.0076	320.1	903.9	0.1694	0.0011	0.0065	0.5
TraesCS4A02G291900.1	TRIUR318670-P1	T. urartu	0.2702	212.9	756.1	0.5452	0.0761	0.1396	10.7385
TraesCS4A02G292100.1	TRIUR318670-P1	T. urartu	0.2769	212.9	759.1	0.5305	0.0773	0.1457	11.2077
TraesCS4A02G292200.1	TRIUR330726-P1	T. urartu	0.1042	169.6	787.4	0.7156	0.0325	0.0454	3.49231
TraesCS4A02G292700.1	TRIUR305978-P1	T. urartu	0.2525	132.4	623.6	0.471	0.0703	0.1493	11.4846
TraesCS4A02G292800.1	TRIUR305977-P1	T. urartu	0.0509	140.4	711.6	0.5606	0.015	0.0268	2.06154
TraesCS4A02G297500.1	TRIUR311841-P1	T. urartu	0.0515	37.5	481.5	0.0653	0.0084	0.1292	9.93846
TraesCS4A02G306400.1	TRIUR305688-P1	T. urartu	0.07	84.2	221.8	0.0645	0.0047	0.0725	5.57692
TraesCS4A02G310700.1	TRIUR322095-P1	T. urartu	0.1139	450.3	1283.7	0.6397	0.0331	0.0518	3.98462
TraesCS4A02G312500.1	TRIUR307751-P1	T. urartu	0.0441	128.6	495.4	0.8444	0.0142	0.0168	1.29231
TraesCS4A02G320800.1	TRIUR325300-P1	T. urartu	0.075	253.9	814.1	1.3836	0.0268	0.0194	1.49231
TraesCS4A02G322200.1	TRIUR310415-P1	T. urartu	0.0684	170.8	675.2	0.1903	0.0123	0.0644	4.95385
TraesCS4A02G349800.1	TRIUR323040-P1	T. urartu	0.2941	932.2	2691.8	0.5671	0.082	0.1445	11.1154
TraesCS4A02G357500.1	TRIUR312102-P1	T. urartu	0.0276	113.7	549.3	0.8123	0.0088	0.0109	0.838462
TraesCS4A02G357600.1	TRIUR312103-P1	T. urartu	0.0356	118.3	580.7	0.3237	0.0088	0.0271	2.08462
TraesCS4A02G357900.1	TRIUR312102-P1	T. urartu	0.3442	146.8	657.2	0.9579	0.1138	0.1188	9.13846
TraesCS4A02G359500.1	TRIUR333729-P1	T. urartu	0.0149	870.7	2009.3	0.4302	0.0035	0.0082	0.630769
TraesCS4A02G363200.1	TRIUR305886-P1	T. urartu	0.0174	442.4	1150.6	0.3449	0.0038	0.011	0.846154
TraesCS4A02G386800.1	TRIUR313571-P1	T. urartu	0.0928	399.9	980.1	0.7602	0.0284	0.0373	2.86923
TraesCS4A02G395700.1	TRIUR312734-P1	T. urartu	0.3886	119.7	411.3	0.6969	0.118	0.1693	13.0231
TraesCS4A02G396400.1	TRIUR303043-P1	T. urartu	0.2453	376.8	1366.2	0.2699	0.0516	0.1912	14.7077
TraesCS4A02G403600.1	TRIUR304104-P1	T. urartu	0.2446	342	780	0.8636	0.0778	0.0901	6.93077
TraesCS4A02G404700.1	TRIUR334325-P1	T. urartu	0.0102	101.3	495.7	0.3567	0.0026	0.0073	0.561538
TraesCS4A02G405800.1	TRIUR326324-P1	T. urartu	0.1071	43.8	496.2	0.2782	0.0295	0.106	8.15385
TraesCS4A02G408700.1	TRIUR327148-P1	T. urartu	0.0224	128.6	558.4	0.4846	0.0062	0.0128	0.984615
TraesCS4A02G408800.1	TRIUR327148-P1	T. urartu	0.2784	160.5	673.5	0.3981	0.0719	0.1805	13.8846
TraesCS4A02G415000.1	TRIUR305672-P1	T. urartu	0.1205	682.1	1867.9	0.9101	0.0391	0.043	3.30769
TraesCS4A02G416800.1	TRIUR327468-P1	T. urartu	0.019	948.9	2594.1	0.7488	0.0058	0.0078	0.6
TraesCS4A02G452600.1	TRIUR330912-P1	T. urartu	0.1357	39.2	344.8	0.163	0.0297	0.182	14
TraesCS4A02G458500.1	TRIUR332580-P1	T. urartu	0.1999	131.1	363.9	0.2177	0.0341	0.1568	12.0615
TraesCS4A02G459200.1	TRIUR317295-P1	T. urartu	0.1489	100.1	775.9	0.096	0.0239	0.249	19.1538
TraesCS4A02G464900.1	TRIUR306598-P1	T. urartu	0.1137	1105.6	2839.4	0.3734	0.0258	0.069	5.30769
TraesCS4A02G469900.1	TRIUR305123-P1	T. urartu	0.2867	362.4	1005.6	0.4071	0.069	0.1694	13.0308
TraesCS4A02G486200.1	TRIUR308851-P1	T. urartu	0.1525	291.1	716.9	0.0545	0.0085	0.1552	11.9385
TraesCS4B02G001200.1	TRIDC4BG001610.1	T. dicoccoides	0.0223	191.6	498.4	0.551	0.0061	0.011	0.846154
TraesCS4B02G001900.1	TRIDC4BG001690.1	T. dicoccoides	0.0841	46.4	331.6	0.0571	0.0093	0.1622	12.4769
TraesCS4B02G002000.1	TRIDC4BG001700.2	T. dicoccoides	0.0172	153.9	731.1	0.806	0.0055	0.0068	0.523077
TraesCS4B02G003500.1	TRIDC4BG001310.1	T. dicoccoides	0.213	473.2	1212.8	0.4953	0.0552	0.1115	8.57692
TraesCS4B02G016200.1	TRIDC4BG002800.1	T. dicoccoides	0.0793	57.6	461.4	0.1823	0.0176	0.0968	7.44615
TraesCS4B02G019200.1	TRIDC4BG003350.2	T. dicoccoides	0.0184	135	858	0.3104	0.0047	0.0152	1.16923
TraesCS4B02G020900.1	TRIDC4BG003560.1	T. dicoccoides	0.1415	98.6	528.4	0.1355	0.0235	0.1738	13.3692
TraesCS4B02G021100.1	TRIDC4BG003560.1	T. dicoccoides	0.2734	97	521	0.2252	0.0592	0.2627	20.2077
TraesCS4B02G021200.1	TRIDC4BG003560.2	T. dicoccoides	0.1694	115.4	535.6	0.26	0.0375	0.1444	11.1077
TraesCS4B02G021500.1	TRIDC4BG003560.1	T. dicoccoides	0.2158	97.9	517.1	0.4004	0.0581	0.145	11.1538
TraesCS4B02G021900.1	TRIDC4BG003750.2	T. dicoccoides	0.099	191.2	774.8	0.1525	0.0157	0.1031	7.93077
TraesCS4B02G023300.1	TRIDC4BG004040.3	T. dicoccoides	0.1733	56.8	456.2	0.1194	0.0318	0.2664	20.4923
TraesCS4B02G025400.1	TRIDC4BG004340.2	T. dicoccoides	0.0394	121.5	670.5	0.1692	0.0075	0.0443	3.40769
TraesCS4B02G028500.1	TRIDC4BG004770.1	T. dicoccoides	0.0078	667.9	1669.1	0.7808	0.0024	0.0031	0.238462
TraesCS4B02G037000.1	TRIDC4BG006040.1	T. dicoccoides	0.0068	588.8	1640.2	0.5239	0.0018	0.0035	0.269231
TraesCS4B02G043100.1	TRIDC4BG006760.2	T. dicoccoides	0.005	193.4	1669.6	0.0563	0.0006	0.0108	0.830769
TraesCS4B02G044100.1	TRIDC4BG006920.2	T. dicoccoides	0.0142	224.3	846.7	0.1794	0.0024	0.0134	1.03077
TraesCS4B02G046500.1	TRIDC5BG011840.4	T. dicoccoides	0.3374	48.7	188.3	0.4069	0.0866	0.2127	16.3615
TraesCS4B02G051500.1	TRIDC4BG008060.2	T. dicoccoides	0.0411	341	1000	0.6721	0.0122	0.0181	1.39231
TraesCS4B02G052400.1	TRIDC4BG008190.2	T. dicoccoides	0.017	123.1	602.9	0.0661	0.0017	0.0252	1.93846
TraesCS4B02G054000.1	TRIDC4BG008460.2	T. dicoccoides	0.0116	198.4	1442.6	0.1281	0.0021	0.0165	1.26923
TraesCS4B02G057900.1	TRIDC4BG008980.2	T. dicoccoides	0.0114	158.2	930.8	0.0552	0.0011	0.0197	1.51538
TraesCS4B02G059000.1	TRIDC4BG009100.9	T. dicoccoides	0.0508	213.2	752.8	0.9332	0.0167	0.0179	1.37692
TraesCS4B02G060000.1	TRIDC4BG009270.1	T. dicoccoides	0.1804	258.5	1322.5	0.3524	0.0462	0.1312	10.0923
TraesCS4B02G072500.1	TRIDC4BG011170.1	T. dicoccoides	0.0121	138.8	371.2	0.3555	0.0027	0.0076	0.584615
TraesCS4B02G073100.1	TRIDC4BG011260.1	T. dicoccoides	0.0032	420.8	1544.2	0.2529	0.0006	0.0025	0.192308
TraesCS4B02G073200.1	TRIDC4BG011270.4	T. dicoccoides	0.0061	539.5	1491.5	0.116	0.0007	0.0058	0.446154
TraesCS4B02G073400.1	TRIDC4BG011290.3	T. dicoccoides	0.0058	431.8	1149.2	0.7309	0.0018	0.0024	0.184615
TraesCS4B02G073600.1	TRIDC4BG011290.11	T. dicoccoides	0.0139	375.7	1205.3	0.1172	0.0017	0.0141	1.08462
TraesCS4B02G079900.1	TRIDC4BG012450.1	T. dicoccoides	0.0218	35	613	0.0429	0.0033	0.0768	5.90769
TraesCS4B02G084700.1	TRIDC4BG013090.2	T. dicoccoides	0.0133	503.5	1545.5	1.3977	0.0048	0.0034	0.261538
TraesCS4B02G089700.1	TRIDC4BG013930.3	T. dicoccoides	0.008	181.2	961.8	0.3532	0.0021	0.0059	0.453846
TraesCS4B02G096500.1	TRIDC4BG014980.1	T. dicoccoides	0.0494	118.5	640.5	0.316	0.0123	0.039	3
TraesCS4B02G111000.1	TRIDC4BG017240.1	T. dicoccoides	0.0166	253.9	1054.1	0.2085	0.0032	0.0153	1.17692
TraesCS4B02G114600.1	TRIDC4BG017720.1	T. dicoccoides	0.0031	309.2	1676.8	0.1803	0.0006	0.0033	0.253846
TraesCS4B02G117100.1	TRIDC4BG018120.2	T. dicoccoides	0.011	164.8	672.2	0.1199	0.0015	0.0125	0.961538
TraesCS4B02G133000.1	TRIDC4BG021410.1	T. dicoccoides	0.0141	86	352	0.2302	0.0028	0.0123	0.946154
TraesCS4B02G135000.1	TRIDC4BG021000.3	T. dicoccoides	0.0784	277.4	916.6	0.5186	0.0215	0.0415	3.19231
TraesCS4B02G140100.1	TRIDC4BG021910.1	T. dicoccoides	0.0219	88.1	328.9	0.5172	0.0061	0.0118	0.907692
TraesCS4B02G141100.1	TRIDC4BG022060.1	T. dicoccoides	0.0048	534.8	1352.2	0.8135	0.0015	0.0019	0.146154
TraesCS4B02G150200.1	TRIDC4BG023070.6	T. dicoccoides	0.0109	240.9	908.1	0.243	0.0022	0.009	0.692308
TraesCS4B02G165900.1	TRIDC4BG025790.6	T. dicoccoides	0.0307	221.5	858.5	2.2664	0.0116	0.0051	0.392308
TraesCS4B02G172900.1	TRIDC4BG031370.3	T. dicoccoides	0.4177	239.1	774.9	0.7467	0.1289	0.1727	13.2846
TraesCS4B02G174400.1	TRIDC4BG031600.1	T. dicoccoides	0.0368	195.2	731.8	0.2149	0.0069	0.0323	2.48462
TraesCS4B02G175800.1	TRIDC4BG034850.3	T. dicoccoides	0.0138	54.9	605.1	0.1764	0.0033	0.0188	1.44615
TraesCS4B02G187000.1	TRIDC4BG032710.1	T. dicoccoides	0.0241	152.2	741.8	0.2641	0.0054	0.0206	1.58462
TraesCS4B02G206800.1	TRIDC4BG037080.2	T. dicoccoides	0.1128	250.7	838.3	0.4657	0.0298	0.0639	4.91538
TraesCS4B02G217400.1	TRIDC4BG038610.2	T. dicoccoides	0.0051	163.9	1054.1	0.1465	0.0009	0.0065	0.5
TraesCS4B02G221600.1	TRIDC6BG048250.1	T. dicoccoides	0.3589	210.2	710.8	0.2298	0.0678	0.2949	22.6846
TraesCS4B02G222000.1	TRIDC4BG039270.2	T. dicoccoides	0.133	25.1	232.9	0.3895	0.0385	0.0987	7.59231
TraesCS4B02G231300.1	TRIDC4BG040760.1	T. dicoccoides	0.0089	118.1	577.9	0.1938	0.0017	0.009	0.692308
TraesCS4B02G234700.1	TRIDC4BG041370.2	T. dicoccoides	0.1166	126.4	710.6	0.4023	0.0317	0.0789	6.06923
TraesCS4B02G235900.1	TRIDC4BG041640.3	T. dicoccoides	0.0064	452.2	1440.8	0.3137	0.0014	0.0045	0.346154
TraesCS4B02G239700.1	TRIDC4BG042140.4	T. dicoccoides	0.0109	336.6	797.4	0.4077	0.0025	0.0062	0.476923
TraesCS4B02G242600.1	TRIDC4BG042540.1	T. dicoccoides	0.1045	486.5	1832.5	0.8437	0.0335	0.0398	3.06154
TraesCS4B02G245800.1	TRIDC4BG042950.1	T. dicoccoides	0.2326	149.2	513.8	0.649	0.0691	0.1065	8.19231
TraesCS4B02G277800.1	TRIDC4BG042950.1	T. dicoccoides	0.3337	163.1	511.9	0.5581	0.0934	0.1673	12.8692
TraesCS4B02G280700.1	TRIDC4BG048390.2	T. dicoccoides	0.049	180.3	1583.7	0.0662	0.0067	0.1011	7.77692
TraesCS4B02G287900.1	TRIDC4BG049450.3	T. dicoccoides	0.0213	51.9	224.1	0.2594	0.0046	0.0178	1.36923
TraesCS4B02G288000.1	TRIDC4BG049510.1	T. dicoccoides	0.0244	34.8	220.2	0.1495	0.0046	0.0306	2.35385
TraesCS4B02G292900.1	TRIDC4BG050220.1	T. dicoccoides	0.0097	247.4	1336.6	0.0453	0.0008	0.0166	1.27692
TraesCS4B02G299400.1	TRIDC4BG051160.2	T. dicoccoides	0.0139	127.9	754.1	0.5006	0.0041	0.0081	0.623077
TraesCS4B02G299500.1	TRIDC4BG051190.3	T. dicoccoides	0.0064	160.7	787.3	0.1994	0.0013	0.0064	0.492308
TraesCS4B02G299600.1	TRIDC4BG051230.1	T. dicoccoides	0.0102	174.1	704.9	0.1309	0.0015	0.0112	0.861538
TraesCS4B02G299700.1	TRIDC4BG051260.1	T. dicoccoides	0.0062	155.5	852.5	0.1707	0.0012	0.0069	0.530769
TraesCS4B02G301400.1	TRIDC4BG051420.1	T. dicoccoides	0.0084	169.3	562.7	0.282	0.0018	0.0063	0.484615
TraesCS4B02G306300.1	TRIDC4BG052240.5	T. dicoccoides	0.0039	846.2	2309.8	0.1169	0.0004	0.0037	0.284615
TraesCS4B02G316100.1	TRIDC4BG053380.2	T. dicoccoides	0.0186	20.3	540.7	0.0161	0.0019	0.1198	9.21538
TraesCS4B02G316200.1	TRIDC4BG053390.2	T. dicoccoides	0.0082	110.3	621.7	0.1859	0.0016	0.0088	0.676923
TraesCS4B02G317400.1	TRIDC4BG053560.2	T. dicoccoides	0.0078	1118.6	2403.4	0.5776	0.0021	0.0037	0.284615
TraesCS4B02G323300.1	TRIDC4BG054360.2	T. dicoccoides	0.1047	108.7	488.3	0.2994	0.0245	0.0817	6.28462
TraesCS4B02G331900.1	TRIDC4BG055600.2	T. dicoccoides	0.0176	149.9	765.1	0.0447	0.0013	0.0292	2.24615
TraesCS4B02G332000.1	TRIDC4BG055620.3	T. dicoccoides	0.0147	204.1	833.9	0.355	0.0036	0.0102	0.784615
TraesCS4B02G336200.1	TRIDC4BG056380.3	T. dicoccoides	0.0456	351.7	1400.3	0.7178	0.0141	0.0196	1.50769
TraesCS4B02G342800.1	TRIDC4BG057710.1	T. dicoccoides	0.0057	174	906	0.1815	0.0011	0.0061	0.469231
TraesCS4B02G345600.1	TRIDC4BG058180.1	T. dicoccoides	0.1969	191.7	1125.3	0.4536	0.0558	0.1231	9.46923
TraesCS4B02G345800.1	TRIDC4BG058260.1	T. dicoccoides	0.2214	178.4	688.6	0.7964	0.0701	0.088	6.76923
TraesCS4B02G347100.1	TRIDC4BG058410.1	T. dicoccoides	0.1044	152.7	744.3	0.4975	0.0297	0.0597	4.59231
TraesCS4B02G348500.1	TRIDC4BG058550.1	T. dicoccoides	0.0064	128.1	828.9	0.149	0.0012	0.0081	0.623077
TraesCS4B02G350600.1	TRIDC4BG058810.2	T. dicoccoides	0.0049	349.9	1522.1	0.4251	0.0013	0.0031	0.238462
TraesCS4B02G351500.1	TRIDC3BG069250.3	T. dicoccoides	0.3877	113.6	378.4	0.4445	0.1003	0.2256	17.3538
TraesCS4B02G383200.1	TRIDC4BG062640.1	T. dicoccoides	0.1059	76.6	571.4	0.1303	0.0197	0.1514	11.6462
TraesCS4B02G384700.1	TRIDC4BG062670.1	T. dicoccoides	0.0172	129.8	758.2	0.2563	0.004	0.0157	1.20769
TraesCS4B02G396900.1	TRIDC4BG063860.5	T. dicoccoides	0.0177	311.5	1764.5	0.0858	0.0023	0.0265	2.03846
TraesCS4D02G003500.1	EMT01329	Ae. tauschii	0.024	398.8	1302.2	0.1783	0.0038	0.0215	1.65385
TraesCS4D02G007000.1	EMT30013	Ae. tauschii	0.0639	82.6	349.4	0.3001	0.0147	0.0491	3.77692
TraesCS4D02G019200.1	EMT20704	Ae. tauschii	0.2778	168.8	770.2	0.2764	0.063	0.2278	17.5231
TraesCS4D02G020300.1	EMT24019	Ae. tauschii	0.0062	237	762	0.2874	0.0013	0.0045	0.346154
TraesCS4D02G021100.1	EMT16662	Ae. tauschii	0.2198	114.5	845.5	0.2494	0.0539	0.2162	16.6308
TraesCS4D02G022600.1	EMT16587	Ae. tauschii	0.032	407.6	1398.4	1.0532	0.0108	0.0103	0.792308
TraesCS4D02G026100.1	EMT20592	Ae. tauschii	0.0455	528.7	1832.3	0.7751	0.0142	0.0184	1.41538
TraesCS4D02G040100.1	EMT33277	Ae. tauschii	0.3771	147.2	626.8	0.6272	0.1129	0.18	13.8462
TraesCS4D02G051600.1	EMT32961	Ae. tauschii	0.0678	340	1157	1.0404	0.0228	0.0219	1.68462
TraesCS4D02G053300.1	EMT11710	Ae. tauschii	0.0326	509.3	1719.7	2.1646	0.0124	0.0057	0.438462
TraesCS4D02G058900.1	EMT10296	Ae. tauschii	0.0097	252.5	695.5	0.6671	0.0029	0.0043	0.330769
TraesCS4D02G059600.1	EMT02729	Ae. tauschii	0.0259	232.1	1174.9	1.211	0.0089	0.0074	0.569231
TraesCS4D02G064200.1	EMT16558	Ae. tauschii	0.0113	272.7	528.3	0.2655	0.0019	0.0073	0.561538
TraesCS4D02G071200.1	EMT20647	Ae. tauschii	0.0977	106.3	730.7	0.5585	0.0296	0.053	4.07692
TraesCS4D02G071700.1	EMT09782	Ae. tauschii	0.0257	469.7	1204.3	0.4962	0.0067	0.0134	1.03077
TraesCS4D02G072200.1	EMT06472	Ae. tauschii	0.0182	325	1202	0.49	0.005	0.0101	0.776923
TraesCS4D02G080500.1	EMT30739	Ae. tauschii	0.191	236.2	792.8	0.7815	0.0598	0.0766	5.89231
TraesCS4D02G083200.1	EMT06934	Ae. tauschii	0.1033	598.5	2134.5	1.0093	0.0345	0.0342	2.63077
TraesCS4D02G087000.1	EMT09265	Ae. tauschii	0.0113	105.1	449.9	0.2097	0.0022	0.0105	0.807692
TraesCS4D02G090800.1	EMT13220	Ae. tauschii	0.0324	136.6	811.4	0.3198	0.0083	0.0258	1.98462
TraesCS4D02G095700.1	EMT02851	Ae. tauschii	0.0675	177.3	836.7	0.3059	0.0161	0.0526	4.04615
TraesCS4D02G110800.1	EMT19461	Ae. tauschii	0.2577	348.9	1073.1	0.8653	0.0827	0.0956	7.35385
TraesCS4D02G111900.1	EMT30798	Ae. tauschii	0.1698	133.7	826.3	0.3057	0.043	0.1406	10.8154
TraesCS4D02G114900.1	EMT21501	Ae. tauschii	0.0514	154.7	691.3	0.4779	0.0143	0.0299	2.3
TraesCS4D02G129900.1	EMT18246	Ae. tauschii	0.0155	301.1	1063.9	1.5609	0.0056	0.0036	0.276923
TraesCS4D02G135500.1	EMT18588	Ae. tauschii	0.0032	403.7	1534.3	0.2471	0.0006	0.0026	0.2
TraesCS4D02G135900.1	EMT03074	Ae. tauschii	0.0208	338	1564	0.8803	0.0068	0.0077	0.592308
TraesCS4D02G136000.1	EMT03073	Ae. tauschii	0.0032	417.9	1529.1	0.2567	0.0007	0.0025	0.192308
TraesCS4D02G136300.1	EMT03071	Ae. tauschii	0.0064	431.9	1461.1	0.8714	0.0021	0.0024	0.184615
TraesCS4D02G151700.1	EMT16145	Ae. tauschii	0.1595	305.9	924.1	0.5419	0.0439	0.0811	6.23846
TraesCS4D02G163600.1	EMT30498	Ae. tauschii	0.0871	209.9	822.1	0.7374	0.0271	0.0367	2.82308
TraesCS4D02G176500.1	EMT31949	Ae. tauschii	0.1391	223.8	838.2	0.8017	0.0441	0.055	4.23077
TraesCS4D02G181100.1	EMT01874	Ae. tauschii	0.0098	122.5	834.5	0.2688	0.0024	0.009	0.692308
TraesCS4D02G182100.1	EMT28877	Ae. tauschii	0.0606	239.2	825.8	2.1289	0.0229	0.0108	0.830769
TraesCS4D02G187100.1	EMT16219	Ae. tauschii	0.006	193.1	844.9	0.2117	0.0012	0.0056	0.430769
TraesCS4D02G216300.1	EMT30392	Ae. tauschii	0.016	87.1	488.9	0.3663	0.0042	0.0115	0.884615
TraesCS4D02G228800.1	EMT23464	Ae. tauschii	0.0191	111.1	530.9	0.5567	0.0056	0.0101	0.776923
TraesCS4D02G229400.1	EMT26586	Ae. tauschii	0.0721	503	1750	1.1783	0.0249	0.0211	1.62308
TraesCS4D02G232600.1	EMT04618	Ae. tauschii	0.0186	98.4	555.6	0.5396	0.0055	0.0102	0.784615
TraesCS4D02G232800.1	EMT04618	Ae. tauschii	0.3608	97.7	526.3	0.4157	0.0986	0.2372	18.2462
TraesCS4D02G235900.1	EMT27133	Ae. tauschii	0.1112	141.6	788.4	0.4588	0.0314	0.0685	5.26923
TraesCS4D02G239600.1	EMT07635	Ae. tauschii	0.0421	212	811	0.6975	0.0129	0.0185	1.42308
TraesCS4D02G242000.1	EMT27713	Ae. tauschii	0.0627	441.2	1577.8	0.6492	0.0187	0.0288	2.21538
TraesCS4D02G245300.1	EMT28826	Ae. tauschii	0.3388	126.3	416.7	0.823	0.1075	0.1307	10.0538
TraesCS4D02G249400.1	EMT22877	Ae. tauschii	0.0184	62.4	600.6	0.3001	0.005	0.0168	1.29231
TraesCS4D02G275500.1	EMT04182	Ae. tauschii	0.0034	454.9	1339.1	0.3196	0.0007	0.0023	0.176923
TraesCS4D02G294900.1	EMT02191	Ae. tauschii	0.0475	390.3	1061.7	0.0166	0.0009	0.0564	4.33846
TraesCS4D02G299700.1	EMT12994	Ae. tauschii	0.0083	208.6	514.4	0.3992	0.0019	0.0049	0.376923
TraesCS4D02G304500.1	EMT32010	Ae. tauschii	0.0264	683.4	2331.6	0.7176	0.0081	0.0113	0.869231
TraesCS4D02G306300.1	EMT16739	Ae. tauschii	0.3795	177.4	746.6	0.3191	0.0897	0.2812	21.6308
TraesCS4D02G310000.1	EMT04957	Ae. tauschii	0.0336	167.3	564.7	0.6144	0.0098	0.0159	1.22308
TraesCS4D02G312500.1	EMT09407	Ae. tauschii	0.0629	610.7	1765.3	0.6265	0.0182	0.029	2.23077
TraesCS4D02G314000.1	EMT10917	Ae. tauschii	0.0088	831.8	2609.2	1.1838	0.003	0.0026	0.2
TraesCS4D02G316100.1	EMT06498	Ae. tauschii	0.0295	75.4	344.6	0.2089	0.0058	0.028	2.15385
TraesCS4D02G316800.1	EMT11192	Ae. tauschii	0.3133	61.8	439.2	0.2642	0.0777	0.2943	22.6385
TraesCS4D02G319800.1	EMT07248	Ae. tauschii	0.2757	121	551	0.278	0.0626	0.2252	17.3231
TraesCS4D02G320000.1	EMT25875	Ae. tauschii	0.3118	169.6	652.4	0.6484	0.0935	0.1442	11.0923
TraesCS4D02G322400.1	EMT32794	Ae. tauschii	0.0282	487	1577	0.6436	0.0083	0.0129	0.992308
TraesCS4D02G325700.1	EMT28257	Ae. tauschii	0.0205	169.5	871.5	0.4654	0.0058	0.0124	0.953846
TraesCS4D02G330500.1	EMT03129	Ae. tauschii	0.1714	186.5	761.5	0.483	0.0472	0.0977	7.51538
TraesCS4D02G338800.1	EMT07543	Ae. tauschii	0.0195	150.2	809.8	0.1715	0.0037	0.0216	1.66154
TraesCS4D02G339100.1	EMT02668	Ae. tauschii	0.0988	65.6	675.4	0.1178	0.0198	0.1681	12.9308
TraesCS4D02G341000.1	EMT07955	Ae. tauschii	0.1031	84.7	401.3	0.384	0.0269	0.07	5.38462
TraesCS4D02G346300.1	EMT04724	Ae. tauschii	0.6378	88.1	334.9	0.6691	0.1928	0.2881	22.1615
TraesCS4D02G359600.1	EMT24595	Ae. tauschii	0.0214	624.3	1877.7	0.1665	0.0032	0.019	1.46154
TraesCS4D02G360600.1	EMT00423	Ae. tauschii	0.0464	150.9	650.1	0.3152	0.011	0.0348	2.67692
TraesCS5A02G005500.1	TRIUR306950-P1	T. urartu	0.1034	763.4	2728.6	0.6581	0.031	0.0471	3.62308
TraesCS5A02G010400.1	TRIUR333847-P1	T. urartu	0.3295	177.4	734.6	0.8597	0.1065	0.1238	9.52308
TraesCS5A02G014800.1	TRIUR329908-P1	T. urartu	0.2877	85.8	577.2	0.278	0.0718	0.2583	19.8692
TraesCS5A02G020700.1	TRIUR311502-P1	T. urartu	0.3686	144.7	593.3	0.5797	0.1076	0.1856	14.2769
TraesCS5A02G022100.1	TRIUR320013-P1	T. urartu	0.2763	218.1	804.9	0.405	0.0701	0.1732	13.3231
TraesCS5A02G029900.1	TRIUR328596-P1	T. urartu	0.1608	224.9	711.1	1.403	0.0576	0.041	3.15385
TraesCS5A02G038300.1	TRIUR310132-P1	T. urartu	0.0494	682.2	1990.8	0.9204	0.0161	0.0175	1.34615
TraesCS5A02G041500.1	TRIUR310613-P1	T. urartu	0.263	188.6	609.4	0.9407	0.0864	0.0918	7.06154
TraesCS5A02G043300.1	TRIUR330486-P1	T. urartu	0.1637	96.7	329.3	1.1792	0.0565	0.0479	3.68462
TraesCS5A02G043400.1	TRIUR326547-P1	T. urartu	0.0462	667.4	1870.6	0.6209	0.0133	0.0213	1.63846
TraesCS5A02G049100.1	TRIUR303598-P1	T. urartu	0.1591	121.6	523.4	0.4504	0.0431	0.0957	7.36154
TraesCS5A02G049600.1	TRIUR331817-P1	T. urartu	0.2707	157	785	0.6229	0.082	0.1316	10.1231
TraesCS5A02G053800.1	TRIUR314039-P1	T. urartu	0.0307	468	1692	2.5585	0.0118	0.0046	0.353846
TraesCS5A02G057500.1	TRIUR315470-P1	T. urartu	0.0171	280.1	610.9	0.6948	0.005	0.0072	0.553846
TraesCS5A02G059100.1	TRIUR320596-P1	T. urartu	0.1121	240.3	788.7	0.63	0.0329	0.0521	4.00769
TraesCS5A02G060200.1	TRIUR333054-P1	T. urartu	0.0101	131.4	753.6	0.0894	0.0013	0.015	1.15385
TraesCS5A02G064700.1	TRIUR318636-P1	T. urartu	0.6763	194.3	519.7	1.1144	0.2319	0.2081	16.0077
TraesCS5A02G065000.1	TRIUR317243-P1	T. urartu	0.0175	274.6	766.4	0.6999	0.0052	0.0075	0.576923
TraesCS5A02G065100.1	TRIUR317244-P1	T. urartu	0.0086	266.1	786.9	0.658	0.0025	0.0039	0.3
TraesCS5A02G066400.1	TRIUR330399-P1	T. urartu	0.0143	691.5	1228.5	1.1283	0.005	0.0044	0.338462
TraesCS5A02G066600.1	TRIUR314607-P1	T. urartu	0.4288	284.7	951.3	0.8533	0.1375	0.1611	12.3923
TraesCS5A02G066700.1	TRIUR314607-P1	T. urartu	0.0193	223.4	562.6	0.2625	0.0036	0.0136	1.04615
TraesCS5A02G066800.1	TRIUR314606-P1	T. urartu	0.113	313.2	1147.8	0.5385	0.0318	0.0591	4.54615
TraesCS5A02G067000.1	TRIUR322120-P1	T. urartu	0.2171	452	1768	0.6884	0.0662	0.0962	7.4
TraesCS5A02G067600.1	TRIUR324341-P1	T. urartu	0.0106	188	682	0.5118	0.0029	0.0057	0.438462
TraesCS5A02G068900.1	TRIUR317056-P1	T. urartu	0.1149	140.5	636.5	0.3396	0.0283	0.0834	6.41538
TraesCS5A02G080300.1	TRIUR322881-P1	T. urartu	0.2075	348.5	1268.5	0.6672	0.0625	0.0936	7.2
TraesCS5A02G083100.1	TRIUR316862-P1	T. urartu	0.043	199	512	1.1835	0.015	0.0127	0.976923
TraesCS5A02G087100.1	TRIUR332110-P1	T. urartu	0.1398	120.1	554.9	0.6716	0.0429	0.0638	4.90769
TraesCS5A02G090100.1	TRIUR320767-P1	T. urartu	0.0059	839.3	2271.7	0.6984	0.0018	0.0025	0.192308
TraesCS5A02G099000.1	TRIUR311581-P1	T. urartu	0.0234	125.8	651.2	0.3882	0.0062	0.016	1.23077
TraesCS5A02G100400.1	TRIUR331431-P1	T. urartu	0.0243	313.3	1198.7	0.4028	0.0062	0.0154	1.18462
TraesCS5A02G101000.1	TRIUR333254-P1	T. urartu	0.0104	255.5	911.5	0.2762	0.0022	0.008	0.615385
TraesCS5A02G109400.1	TRIUR321570-P1	T. urartu	0.0751	701.4	2796.6	0.7764	0.0237	0.0305	2.34615
TraesCS5A02G115300.1	TRIUR334165-P1	T. urartu	0.1353	232.9	781.1	1.4153	0.0484	0.0342	2.63077
TraesCS5A02G117500.1	TRIUR328215-P1	T. urartu	0.0121	176.1	585.9	0.581	0.0034	0.0059	0.453846
TraesCS5A02G118500.1	TRIUR307169-P1	T. urartu	0.5415	246.6	791.4	0.7508	0.1673	0.2228	17.1385
TraesCS5A02G121100.1	TRIUR324688-P1	T. urartu	0.3982	181	614	0.9302	0.1305	0.1403	10.7923
TraesCS5A02G124200.1	TRIUR311128-P1	T. urartu	0.0184	382	926	0.6679	0.0054	0.008	0.615385
TraesCS5A02G125900.1	TRIUR333184-P1	T. urartu	0.0078	377.4	792.6	0.9389	0.0026	0.0027	0.207692
TraesCS5A02G127100.1	TRIUR316157-P1	T. urartu	0.031	153.8	635.2	1.6557	0.0112	0.0068	0.523077
TraesCS5A02G127200.1	TRIUR333275-P1	T. urartu	0.0477	96.9	482.1	0.2498	0.0106	0.0424	3.26154
TraesCS5A02G140100.1	TRIUR320025-P1	T. urartu	0.2551	94.6	433.4	0.323	0.0618	0.1914	14.7231
TraesCS5A02G141500.1	TRIUR324203-P1	T. urartu	0.1839	215.8	720.2	0.6151	0.0536	0.0871	6.7
TraesCS5A02G141700.1	TRIUR324036-P1	T. urartu	0.0096	290.6	984.4	0.2877	0.002	0.0071	0.546154
TraesCS5A02G142500.1	TRIUR322271-P1	T. urartu	0.0451	116.1	852.9	0.2582	0.0112	0.0433	3.33077
TraesCS5A02G146500.1	TRIUR324639-P1	T. urartu	0.245	201.4	734.6	0.6891	0.0744	0.108	8.30769
TraesCS5A02G146700.1	TRIUR326571-P1	T. urartu	0.0104	203.3	678.7	0.6022	0.003	0.005	0.384615
TraesCS5A02G153800.1	TRIUR311866-P1	T. urartu	0.0498	278	769	1.6108	0.0184	0.0114	0.876923
TraesCS5A02G155900.1	TRIUR333098-P1	T. urartu	0.0489	271.7	673.3	0.5897	0.0136	0.023	1.76923
TraesCS5A02G172500.1	TRIUR320025-P1	T. urartu	0.2033	41.5	243.5	0.1677	0.0394	0.2346	18.0462
TraesCS5A02G174200.1	TRIUR306066-P1	T. urartu	0.0114	352.4	988.6	0.2397	0.0021	0.0086	0.661538
TraesCS5A02G178500.1	TRIUR332248-P1	T. urartu	0.1055	161	604	1.1117	0.0359	0.0323	2.48462
TraesCS5A02G179800.1	TRIUR330537-P1	T. urartu	0.1165	67.7	577.3	0.3482	0.0325	0.0932	7.16923
TraesCS5A02G180800.1	TRIUR317496-P1	T. urartu	0.0235	297.7	632.3	0.1779	0.0032	0.0177	1.36154
TraesCS5A02G185600.1	TRIUR330416-P1	T. urartu	0.018	151.4	871.6	0.3338	0.0046	0.0138	1.06154
TraesCS5A02G185700.1	TRIUR305298-P1	T. urartu	0.0245	140.4	849.6	1.0641	0.0082	0.0078	0.6
TraesCS5A02G203200.1	TRIUR333976-P1	T. urartu	0.0144	78.3	353.7	0.2031	0.0028	0.0138	1.06154
TraesCS5A02G207300.1	TRIUR320728-P1	T. urartu	0.0083	145.2	583.8	0.2442	0.0017	0.007	0.538462
TraesCS5A02G215900.1	TRIUR320682-P1	T. urartu	0.2127	228.9	671.1	0.4325	0.0532	0.1229	9.45385
TraesCS5A02G220900.1	TRIUR304286-P1	T. urartu	0.2481	138.5	557.5	0.518	0.0698	0.1347	10.3615
TraesCS5A02G225500.1	TRIUR316804-P1	T. urartu	0.0112	101	448	0.2105	0.0022	0.0105	0.807692
TraesCS5A02G225600.1	TRIUR316802-P1	T. urartu	0.0377	124	686	0.267	0.0089	0.0331	2.54615
TraesCS5A02G225700.1	TRIUR333768-P1	T. urartu	0.3847	98.5	345.5	0.7345	0.1187	0.1616	12.4308
TraesCS5A02G234500.1	TRIUR313553-P1	T. urartu	0.2735	133.9	547.1	0.5377	0.078	0.145	11.1538
TraesCS5A02G237200.1	TRIUR326781-P1	T. urartu	0.0688	123	459	0.6187	0.0203	0.0328	2.52308
TraesCS5A02G237600.1	TRIUR333705-P1	T. urartu	0.0136	102.7	797.3	0.1258	0.0025	0.0201	1.54615
TraesCS5A02G245900.1	TRIUR311787-P1	T. urartu	0.1631	165.1	746.9	0.4035	0.0429	0.1063	8.17692
TraesCS5A02G250600.1	TRIUR310022-P1	T. urartu	0.0776	227.4	945.6	0.3629	0.0193	0.0532	4.09231
TraesCS5A02G258100.1	TRIUR309462-P1	T. urartu	0.3317	449.5	1344.5	0.6306	0.0964	0.1529	11.7615
TraesCS5A02G263200.1	TRIUR330490-P1	T. urartu	0.1276	86.2	654.8	0.2701	0.0324	0.1198	9.21538
TraesCS5A02G265600.1	TRIUR308598-P1	T. urartu	0.0081	203.2	1305.8	0.4531	0.0023	0.0051	0.392308
TraesCS5A02G265700.1	TRIUR308597-P1	T. urartu	0.0087	331.2	1417.8	0.8376	0.0028	0.0033	0.253846
TraesCS5A02G271500.1	TRIUR301346-P1	T. urartu	0.0258	452.6	1248.4	0.137	0.0032	0.0234	1.8
TraesCS5A02G275900.1	TRIUR320591-P1	T. urartu	0.1139	109.9	553.1	0.3872	0.0301	0.0777	5.97692
TraesCS5A02G278300.1	TRIUR305651-P1	T. urartu	0.0351	33.9	233.1	0.266	0.0087	0.0326	2.50769
TraesCS5A02G278700.1	TRIUR305651-P1	T. urartu	0.1381	35	232	0.1078	0.0221	0.2048	15.7538
TraesCS5A02G284000.1	TRIUR334186-P1	T. urartu	0.0408	93	432	0.162	0.0071	0.0438	3.36923
TraesCS5A02G291200.1	TRIUR321221-P1	T. urartu	0.3101	94.1	409.9	0.5328	0.0888	0.1667	12.8231
TraesCS5A02G291400.1	TRIUR317397-P1	T. urartu	0.0167	596.7	2127.3	1.4237	0.0059	0.0042	0.323077
TraesCS5A02G299400.1	TRIUR326152-P1	T. urartu	0.0259	177.3	542.7	0.3207	0.0057	0.0177	1.36154
TraesCS5A02G307100.1	TRIUR309033-P1	T. urartu	0.0066	993.4	2183.6	0.6199	0.0019	0.003	0.230769
TraesCS5A02G308400.1	TRIUR316337-P1	T. urartu	0.0098	275.7	654.3	0.8748	0.0031	0.0036	0.276923
TraesCS5A02G310600.1	TRIUR329805-P1	T. urartu	0.0183	88.4	586.6	0.4295	0.0052	0.0121	0.930769
TraesCS5A02G314600.1	TRIUR334295-P1	T. urartu	0.076	60.2	476.8	0.4163	0.0219	0.0526	4.04615
TraesCS5A02G316800.1	TRIUR311780-P1	T. urartu	0.0129	66	681	0.0439	0.0015	0.0336	2.58462
TraesCS5A02G330200.1	TRIUR321510-P1	T. urartu	0.0172	534.4	1601.6	0.325	0.0038	0.0116	0.892308
TraesCS5A02G339600.1	TRIUR304784-P1	T. urartu	0.0124	230	784	0.2628	0.0025	0.0096	0.738462
TraesCS5A02G349500.1	TRIUR311978-P1	T. urartu	0.1434	579.5	1769.5	1.284	0.0506	0.0394	3.03077
TraesCS5A02G363700.1	TRIUR321195-P1	T. urartu	0.2535	253.1	928.9	0.6892	0.0771	0.1118	8.6
TraesCS5A02G363800.1	TRIUR321195-P1	T. urartu	0.5085	327.6	956.4	0.7111	0.1536	0.216	16.6154
TraesCS5A02G371500.1	TRIUR318590-P1	T. urartu	0.3388	120.2	434.8	0.6431	0.1008	0.1568	12.0615
TraesCS5A02G375400.1	TRIUR326840-P1	T. urartu	0.063	237.7	659.3	0.4263	0.0155	0.0363	2.79231
TraesCS5A02G375800.1	TRIUR306898-P1	T. urartu	0.0269	634.7	1747.3	1.2133	0.0094	0.0078	0.6
TraesCS5A02G380900.1	TRIUR304618-P1	T. urartu	0.0334	106.4	733.6	0.2634	0.0082	0.0312	2.4
TraesCS5A02G381000.1	TRIUR331885-P1	T. urartu	0.2528	188.8	789.2	0.515	0.0713	0.1384	10.6462
TraesCS5A02G387400.1	TRIUR302033-P1	T. urartu	0.0346	550.6	1465.4	0.4705	0.0088	0.0187	1.43846
TraesCS5A02G390300.1	TRIUR331603-P1	T. urartu	0.0758	227.3	957.7	1.0183	0.0254	0.0249	1.91538
TraesCS5A02G391800.1	TRIUR328280-P1	T. urartu	0.0182	165.3	503.7	0.1093	0.002	0.0184	1.41538
TraesCS5A02G395100.1	TRIUR323179-P1	T. urartu	0.0777	93.5	470.5	0.2962	0.0186	0.0627	4.82308
TraesCS5A02G396800.1	TRIUR310262-P1	T. urartu	0.186	140.3	558.7	0.6543	0.0561	0.0857	6.59231
TraesCS5A02G401300.1	TRIUR323152-P1	T. urartu	0.036	163.6	688.4	0.9701	0.0119	0.0123	0.946154
TraesCS5A02G402800.1	TRIUR315041-P1	T. urartu	0.3425	79.6	346.4	0.5977	0.1014	0.1697	13.0538
TraesCS5A02G405400.1	TRIUR313072-P1	T. urartu	0.0417	208.8	1336.2	0.3131	0.0107	0.0342	2.63077
TraesCS5A02G405800.1	TRIUR313070-P1	T. urartu	0.2349	161.6	681.4	0.4763	0.0647	0.1357	10.4385
TraesCS5A02G405900.1	TRIUR330866-P1	T. urartu	0.2676	106.3	769.7	0.2437	0.0648	0.2659	20.4538
TraesCS5A02G409800.1	TRIUR325879-P1	T. urartu	0.0386	350	1153	1.0545	0.013	0.0124	0.953846
TraesCS5A02G411900.1	TRIUR323954-P1	T. urartu	0.0593	103.8	892.2	0.0653	0.0079	0.1215	9.34615
TraesCS5A02G414000.1	TRIUR316715-P1	T. urartu	0.005	304.6	928.4	0.3098	0.0011	0.0035	0.269231
TraesCS5A02G438500.1	TRIUR314746-P1	T. urartu	0.0199	316.3	610.7	0.4987	0.0049	0.0099	0.761538
TraesCS5A02G438600.1	TRIUR325576-P1	T. urartu	0.5025	401.1	1125.9	0.9739	0.1663	0.1708	13.1385
TraesCS5A02G438700.1	TRIUR325576-P1	T. urartu	0.7852	397.5	1129.5	0.8717	0.2521	0.2892	22.2462
TraesCS5A02G440400.1	TRIUR324233-P1	T. urartu	0.0062	283.6	709.4	0.3846	0.0014	0.0037	0.284615
TraesCS5A02G450800.1	TRIUR330901-P1	T. urartu	0.062	683.1	2394.9	0.7898	0.0195	0.0247	1.9
TraesCS5A02G460800.1	TRIUR321644-P1	T. urartu	0.595	246.5	677.5	0.613	0.1697	0.2769	21.3
TraesCS5A02G467300.1	TRIUR334835-P1	T. urartu	0.0321	53.1	324.9	0.5222	0.0095	0.0181	1.39231
TraesCS5A02G473800.1	TRIUR324919-P1	T. urartu	0.2892	146.1	594.9	0.6573	0.0874	0.133	10.2308
TraesCS5A02G477200.1	TRIUR301060-P1	T. urartu	0.3447	61.1	331.9	0.2909	0.0833	0.2865	22.0385
TraesCS5A02G477500.1	TRIUR301057-P1	T. urartu	0.0573	42.7	290.3	0.256	0.0139	0.0544	4.18462
TraesCS5A02G477700.1	TRIUR320025-P1	T. urartu	0.2267	43.4	241.6	0.2572	0.0525	0.2041	15.7
TraesCS5A02G478200.1	TRIUR315911-P1	T. urartu	0.0162	46.2	346.8	0.1183	0.0029	0.0242	1.86154
TraesCS5A02G482700.1	TRIUR303112-P1	T. urartu	0.0083	273	840	0.1582	0.0012	0.0076	0.584615
TraesCS5A02G491600.1	TRIUR320880-P1	T. urartu	0.0243	60.3	452.7	0.3687	0.0067	0.0183	1.40769
TraesCS5A02G492800.1	TRIUR331750-P1	T. urartu	0.0154	97.1	292.9	0.3433	0.0035	0.0101	0.776923
TraesCS5A02G495500.1	TRIUR309734-P1	T. urartu	0.0125	120.5	605.5	0.4308	0.0034	0.0079	0.607692
TraesCS5A02G495800.1	TRIUR327037-P1	T. urartu	0.3232	165.6	701.4	0.4019	0.0839	0.2088	16.0615
TraesCS5A02G500600.1	TRIUR318560-P1	T. urartu	0.0668	173.1	933.9	0.0744	0.0076	0.1016	7.81538
TraesCS5A02G500700.1	TRIUR318561-P1	T. urartu	0.0202	168	888	1.1088	0.0068	0.0062	0.476923
TraesCS5A02G503500.1	TRIUR329035-P1	T. urartu	0.2457	161.7	780.3	0.5847	0.073	0.1248	9.6
TraesCS5A02G505100.1	TRIUR304029-P1	T. urartu	0.2273	172.1	676.9	0.4999	0.063	0.126	9.69231
TraesCS5A02G505900.1	TRIUR305949-P1	T. urartu	0.0177	333.3	875.7	0.5186	0.0047	0.009	0.692308
TraesCS5A02G506000.1	TRIUR305951-P1	T. urartu	0.2127	366.1	1418.9	0.4115	0.0548	0.1332	10.2462
TraesCS5A02G506100.1	TRIUR305951-P1	T. urartu	0.0852	402.8	1526.2	0.7351	0.0264	0.0359	2.76154
TraesCS5A02G508600.1	TRIUR330050-P1	T. urartu	0.1768	104	514	0.3326	0.044	0.1324	10.1846
TraesCS5A02G514700.1	TRIUR326361-P1	T. urartu	0.1777	118.4	745.6	0.3676	0.0479	0.1304	10.0308
TraesCS5A02G516600.1	TRIUR301515-P1	T. urartu	0.0097	97.2	544.8	0.1547	0.0018	0.0114	0.876923
TraesCS5A02G520200.1	TRIUR319056-P1	T. urartu	0.3671	111.3	377.7	0.6936	0.1112	0.1603	12.3308
TraesCS5A02G524700.1	TRIUR329732-P1	T. urartu	0.0943	601.3	1639.7	0.9712	0.0312	0.0321	2.46923
TraesCS5A02G526100.1	TRIUR328597-P1	T. urartu	0.1753	46.9	316.1	0.3355	0.0465	0.1386	10.6615
TraesCS5A02G533200.1	TRIUR316896-P1	T. urartu	0.5049	130.8	547.2	0.4603	0.1373	0.2982	22.9385
TraesCS5A02G549700.1	TRIUR314835-P1	T. urartu	0.0295	671.8	1698.2	0.0373	0.0012	0.0317	2.43846
TraesCS5A02G555300.1	TRIUR301224-P1	T. urartu	0.0722	149.2	540.8	0.2116	0.0133	0.063	4.84615
TraesCS5B02G004400.1	TRIDC5BG000790.3	T. dicoccoides	0.0061	934.2	2572.8	0.1419	0.0008	0.0055	0.423077
TraesCS5B02G006400.1	TRIDC5BG001240.3	T. dicoccoides	0.0032	451.2	1498.8	0.2856	0.0007	0.0023	0.176923
TraesCS5B02G025100.1	TRIDC5BG003960.1	T. dicoccoides	0.0402	173.9	447.1	0.1245	0.0045	0.0363	2.79231
TraesCS5B02G032000.1	TRIDC5BG005070.4	T. dicoccoides	0.0068	198.4	701.6	0.2904	0.0015	0.005	0.384615
TraesCS5B02G039800.1	TRIDC5BG006630.1	T. dicoccoides	0.0069	752.2	1920.8	0.3785	0.0016	0.0042	0.323077
TraesCS5B02G047200.1	TRIDC5BG007760.2	T. dicoccoides	0.0105	768.6	1868.4	0.1149	0.0011	0.0094	0.723077
TraesCS5B02G062400.1	TRIDC5BG010270.2	T. dicoccoides	0.004	736.9	1558.1	0.24	0.0007	0.0027	0.207692
TraesCS5B02G068000.1	TRIDC5BG011660.1	T. dicoccoides	0.0125	134.3	351.7	0.3757	0.0029	0.0076	0.584615
TraesCS5B02G072600.1	TRIDC5BG011780.1	T. dicoccoides	0.0403	253.1	898.9	0.4231	0.0103	0.0244	1.87692
TraesCS5B02G073500.1	TRIDC5BG012020.3	T. dicoccoides	0.3938	516.3	1385.7	0.742	0.12	0.1617	12.4385
TraesCS5B02G073600.1	TRIDC5BG012020.1	T. dicoccoides	0.5049	297.4	824.6	0.6708	0.1489	0.222	17.0769
TraesCS5B02G073800.1	TRIDC5BG012020.3	T. dicoccoides	0.1407	577.4	1456.6	0.5343	0.0376	0.0704	5.41538
TraesCS5B02G086900.1	TRIDC5BG014280.2	T. dicoccoides	0.0084	109.8	979.2	0.211	0.002	0.0097	0.746154
TraesCS5B02G087600.1	TRIDC5BG014380.2	T. dicoccoides	0.0403	172.7	814.3	0.8134	0.0129	0.0159	1.22308
TraesCS5B02G093000.1	TRIDC5BG015420.4	T. dicoccoides	0.0118	179.6	597.4	0.5834	0.0034	0.0058	0.446154
TraesCS5B02G095900.1	TRIDC5BG015910.5	T. dicoccoides	0.0028	1091.2	2118.8	1.0221	0.001	0.0009	0.0692308
TraesCS5B02G105500.1	TRIDC5BG017440.4	T. dicoccoides	0.0051	372.7	1415.3	0.5194	0.0014	0.0027	0.207692
TraesCS5B02G105900.1	TRIDC5BG017510.1	T. dicoccoides	0.0053	228.3	941.7	0.232	0.0011	0.0046	0.353846
TraesCS5B02G110600.1	TRIDC5BG019490.4	T. dicoccoides	0.0044	1065.2	3119.8	0.187	0.0007	0.0037	0.284615
TraesCS5B02G113400.1	TRIDC5BG018910.1	T. dicoccoides	0.0059	531.2	995.8	1.0528	0.002	0.0019	0.146154
TraesCS5B02G117100.1	TRIDC5BG020460.1	T. dicoccoides	0.0075	236.2	972.8	0.511	0.0021	0.0041	0.315385
TraesCS5B02G117700.1	TRIDC5BG020600.2	T. dicoccoides	0.0107	336.2	1067.8	0.2126	0.0019	0.0089	0.684615
TraesCS5B02G118200.1	TRIDC5BG020680.1	T. dicoccoides	0.6239	223.5	631.5	0.5928	0.1763	0.2974	22.8769
TraesCS5B02G122000.1	TRIDC5BG021190.2	T. dicoccoides	0.2752	242.2	837.8	0.6705	0.0826	0.1233	9.48462
TraesCS5B02G126200.1	TRIDC5BG022130.2	T. dicoccoides	0.0152	178.7	616.3	0.285	0.0032	0.0114	0.876923
TraesCS5B02G126300.1	TRIDC5BG022160.2	T. dicoccoides	0.0644	129.9	587.1	1.2233	0.0222	0.0181	1.39231
TraesCS5B02G133800.1	TRIDC5BG023750.1	T. dicoccoides	0.0757	232.9	1387.1	0.3439	0.0198	0.0576	4.43077
TraesCS5B02G141200.1	TRIDC5BG025130.4	T. dicoccoides	0.0063	122.4	858.6	0.1348	0.0012	0.0087	0.669231
TraesCS5B02G142100.1	TRIDC5BG025270.1	T. dicoccoides	0.029	114	948	0.1173	0.0054	0.0457	3.51538
TraesCS5B02G143100.1	TRIDC5BG025400.3	T. dicoccoides	0.0047	237.6	1676.4	0.278	0.0012	0.0043	0.330769
TraesCS5B02G145400.1	TRIDC5BG025730.1	T. dicoccoides	0.0079	175.8	592.2	0.294	0.0017	0.0058	0.446154
TraesCS5B02G151800.1	TRIDC5BG026670.1	T. dicoccoides	0.0334	311.7	693.3	1.9888	0.0131	0.0066	0.507692
TraesCS5B02G154100.1	TRIDC5BG027030.1	T. dicoccoides	0.0188	278.2	705.8	0.1893	0.0028	0.015	1.15385
TraesCS5B02G157300.1	TRIDC5BG027590.3	T. dicoccoides	0.006	168	837	0.2033	0.0012	0.0059	0.453846
TraesCS5B02G176300.1	TRIDC5BG030630.7	T. dicoccoides	0.0071	223.6	634.4	0.3366	0.0016	0.0047	0.361538
TraesCS5B02G178600.1	TRIDC5BG031060.5	T. dicoccoides	0.0065	328.4	598.6	0.5425	0.0017	0.0031	0.238462
TraesCS5B02G183700.1	TRIDC5BG031790.3	T. dicoccoides	0.015	149.2	867.8	0.2486	0.0035	0.014	1.07692
TraesCS5B02G201900.1	TRIDC5BG034650.2	T. dicoccoides	0.0517	242.8	942.2	0.9206	0.0169	0.0184	1.41538
TraesCS5B02G214400.1	TRIDC5BG036510.1	T. dicoccoides	0.0321	330.2	818.8	0.2866	0.0062	0.0218	1.67692
TraesCS5B02G220400.1	TRIDC5BG037390.2	T. dicoccoides	0.0078	135.7	1046.3	0.2595	0.0019	0.0075	0.576923
TraesCS5B02G225700.1	TRIDC5BG038220.1	T. dicoccoides	0.0077	131.6	1038.4	0.2617	0.002	0.0075	0.576923
TraesCS5B02G229000.1	TRIDC5BG038590.1	T. dicoccoides	0.0092	142.1	859.9	0.0802	0.0012	0.0146	1.12308
TraesCS5B02G236100.1	TRIDC5BG039670.1	T. dicoccoides	0.0103	123	1041	0.1194	0.0019	0.0162	1.24615
TraesCS5B02G236400.1	TRIDC5BG039720.2	T. dicoccoides	0.0101	130	764	0.3397	0.0026	0.0077	0.592308
TraesCS5B02G243800.1	TRIDC5BG040690.2	T. dicoccoides	0.0356	120.2	770.8	0.1802	0.0073	0.0408	3.13846
TraesCS5B02G248100.1	TRIDC5BG041450.6	T. dicoccoides	0.0037	941	2398	0.126	0.0004	0.0033	0.253846
TraesCS5B02G248600.1	TRIDC5BG041520.1	T. dicoccoides	0.008	253	896	0.1415	0.0011	0.008	0.615385
TraesCS5B02G257300.1	TRIDC5BG042760.5	T. dicoccoides	0.0091	600.7	1436.3	0.3937	0.0021	0.0053	0.407692
TraesCS5B02G264300.1	TRIDC5BG043800.2	T. dicoccoides	0.1115	142.6	1075.4	0.2666	0.0281	0.1054	8.10769
TraesCS5B02G265300.1	TRIDC5BG043930.4	T. dicoccoides	0.0544	227.5	1344.5	0.1099	0.0083	0.0759	5.83846
TraesCS5B02G265600.1	TRIDC5BG043980.1	T. dicoccoides	0.0131	217.8	958.2	0.146	0.0021	0.0144	1.10769
TraesCS5B02G266200.1	TRIDC5BG044080.2	T. dicoccoides	0.1024	246.4	1475.6	0.1146	0.0162	0.1415	10.8846
TraesCS5B02G277900.1	TRIDC5BG045810.1	T. dicoccoides	0.0501	31.8	232.2	0.0404	0.0043	0.107	8.23077
TraesCS5B02G282700.1	TRIDC5BG046390.1	T. dicoccoides	0.0411	21.3	203.7	0.2015	0.01	0.0494	3.8
TraesCS5B02G290200.1	TRIDC5BG047620.2	T. dicoccoides	0.0138	119.2	546.8	0.4125	0.0037	0.0089	0.684615
TraesCS5B02G290500.1	TRIDC5BG047650.9	T. dicoccoides	0.0065	777.7	2036.3	0.3702	0.0015	0.004	0.307692
TraesCS5B02G308800.1	TRIDC5BG049760.1	T. dicoccoides	0.0694	185.2	528.8	0.4346	0.0173	0.0398	3.06154
TraesCS5B02G312900.1	TRIDC5BG050150.2	T. dicoccoides	0.4269	143.2	570.8	0.3894	0.1083	0.278	21.3846
TraesCS5B02G315100.1	TRIDC5BG050400.7	T. dicoccoides	0.0065	248	2113	0.1654	0.0014	0.0086	0.661538
TraesCS5B02G315600.1	TRIDC5BG050430.2	T. dicoccoides	0.0102	173.3	1023.7	0.1678	0.002	0.0118	0.907692
TraesCS5B02G326100.1	TRIDC5BG051980.6	T. dicoccoides	0.3928	521.2	1374.8	0.5335	0.1056	0.1979	15.2231
TraesCS5B02G326400.1	TRIDC5BG051980.6	T. dicoccoides	0.1075	505.8	1384.2	0.6193	0.0308	0.0497	3.82308
TraesCS5B02G330100.1	TRIDC5BG052620.2	T. dicoccoides	0.0124	81.5	707.5	0.051	0.0014	0.0277	2.13077
TraesCS5B02G330300.1	TRIDC5BG052670.2	T. dicoccoides	0.0258	589.6	1663.4	0.6042	0.0074	0.0122	0.938462
[truncated: 692 more rows]

## Sheet: Table 4
Table S4. Statistical summary of SNPs of TF genes on the subgenomes.
[truncated: 4,007 more rows]

[truncated: 7 more sheets: Table 5, Table 6, Table 7, Table 8, Table 9, Table 10, Table 11]
